# Supplementary material
Source: publisher figshare collection journal article supplement (https://acs.figshare.com/ndownloader/files/7749838)
Supplement: Supplementary file 1 [file 7749838]

## Sheet: 16S
OTU	Size	Taxonomy	S1	S2	S3	S4	S5	S6	S7
Otu000001	407129	Bacteria(100);Proteobacteria(100);Betaproteobacteria(100);Rhodocyclales(100);Rhodocyclaceae(100);Candidatus_Accumulibacter(100);	0.0647514	0.115145	0.180783	0.166846	0.17625	0.167831	0.134534
Otu000002	373102	Bacteria(100);Chlorobi(100);Chlorobia(100);Chlorobiales(100);SJA-28(100);unclassified(100);	0.014803	0.0350853	0.0510575	0.102479	0.195324	0.264049	0.228862
Otu000003	313785	Bacteria(100);Proteobacteria(100);Betaproteobacteria(100);Rhodocyclales(100);Rhodocyclaceae(100);Candidatus_Accumulibacter(100);	0.28594	0.26753	0.120188	0.057649	0.0264801	0.00966027	0.00187555
Otu000004	102807	Bacteria(100);Bacteroidetes(100);Sphingobacteriia(100);Sphingobacteriales(100);Chitinophagaceae(100);Sediminibacterium(100);	0.0146076	0.0138051	0.0346375	0.0489446	0.0518	0.0363598	0.0546614
Otu000005	95144	Bacteria(100);Proteobacteria(100);Betaproteobacteria(100);Rhodocyclales(100);Rhodocyclaceae(100);Candidatus_Accumulibacter(100);	0.0174901	0.0221008	0.0362666	0.043889	0.051848	0.0509433	0.0161766
Otu000006	91319	Bacteria(100);Bacteroidetes(100);Sphingobacteriia(100);Sphingobacteriales(100);Saprospiraceae(100);Lewinella(100);	0.0467805	0.0763143	0.0362576	0.0206671	0.0118634	0.00831072	0.0265642
Otu000007	87109	Bacteria(100);Proteobacteria(100);Betaproteobacteria(100);Rhodocyclales(100);Rhodocyclaceae(100);Dechloromonas(99);	0.0027502	0.00557254	0.0160714	0.027484	0.0426296	0.0538108	0.0630923
Otu000008	84076	Bacteria(100);Chlorobi(100);Ignavibacteria(100);Ignavibacteriales(100);Ignavibacteriaceae(100);Ignavibacterium(100);	0.0108565	0.0404204	0.0588603	0.0752263	0.0262036	0.0047039	0.000784483
Otu000009	75005	Bacteria(100);Bacteroidetes(100);Sphingobacteriia(100);Sphingobacteriales(100);Saprospiraceae(100);unclassified(100);	0.00686799	0.0125337	0.0236547	0.0291371	0.0339823	0.0344211	0.0461853
Otu000010	72436	Bacteria(100);Bacteroidetes(100);Flavobacteriia(100);Flavobacteriales(100);Flavobacteriaceae(100);Flavobacterium(100);	0.0329633	0.051845	0.0383014	0.0310667	0.017475	0.00761941	0.00294858
Otu000011	70432	Bacteria(100);Proteobacteria(100);Betaproteobacteria(100);Rhodocyclales(100);Rhodocyclaceae(100);Thauera(99);	0.0214816	0.0500807	0.0494766	0.0194828	0.0131078	0.0139644	0.00731283
Otu000012	67497	Bacteria(100);Cyanobacteria(100);Cyanobacteria(100);SubsectionIII(100);FamilyI(100);Leptolyngbya(99);	7.21364e-05	0.00013225	0.000556051	0.0379317	0.0369849	0.0489175	0.0467173
Otu000013	67450	Bacteria(100);Bacteroidetes(100);Sphingobacteriia(100);Sphingobacteriales(100);Saprospiraceae(100);unclassified(100);	0.00540121	0.014797	0.0253409	0.0118033	0.0237088	0.0408623	0.0462935
Otu000014	48433	Bacteria(100);Proteobacteria(100);Gammaproteobacteria(100);Xanthomonadales(100);Xanthomonadaceae(100);Lysobacter(82);	0.0125638	0.0211239	0.0218333	0.0176223	0.0183828	0.0144243	0.0158069
Otu000015	42160	Bacteria(100);Bacteroidetes(100);Sphingobacteriia(100);Sphingobacteriales(100);Chitinophagaceae(100);unclassified(100);	0.0181273	0.0180431	0.0155003	0.0120378	0.0142019	0.0135677	0.0118664
Otu000016	37527	Bacteria(100);Bacteroidetes(100);Flavobacteriia(100);Flavobacteriales(100);Flavobacteriaceae(100);Chryseobacterium(97);	0.0463537	0.0127231	0.00714752	0.0081424	0.0101442	0.0044965	0.000189358
Otu000017	32499	Bacteria(100);Proteobacteria(100);Betaproteobacteria(100);Burkholderiales(100);Comamonadaceae(100);Inhella(99);	0.00238351	0.0239613	0.0202252	0.00965726	0.00725873	0.00716254	0.0102163
Otu000018	29373	Bacteria(100);Proteobacteria(100);Betaproteobacteria(100);Rhodocyclales(100);Rhodocyclaceae(100);Sulfuritalea(100);	0.00015329	0.000610154	0.0020108	0.00577392	0.0108295	0.0133512	0.0359871
Otu000019	28523	Bacteria(100);Bacteroidetes(100);Sphingobacteriia(100);Sphingobacteriales(100);Chitinophagaceae(100);Ferruginibacter(100);	0.00135857	0.00279529	0.00546734	0.00838285	0.0130717	0.0157197	0.0221008
Otu000020	27742	Bacteria(100);Cyanobacteria(100);Melainabacteria(100);Obscuribacterales(100);unclassified(100);unclassified(100);	0.00148781	0.00189058	0.00660649	0.00702128	0.005287	0.0156205	0.0260052
Otu000021	27606	Bacteria(100);Bacteroidetes(100);unclassified(100);unclassified(100);unclassified(100);unclassified(100);	0.00325516	0.00462575	0.0169941	0.0119536	0.0135136	0.00620674	0.0117222
Otu000022	27350	Bacteria(100);Proteobacteria(100);Alphaproteobacteria(100);Caulobacterales(100);Caulobacteraceae(100);Brevundimonas(100);	0.0211179	0.00277124	0.00787189	0.0146828	0.0139764	0.00568976	0.00141568
Otu000023	22806	Bacteria(100);Proteobacteria(100);Betaproteobacteria(100);Rhodocyclales(100);Rhodocyclaceae(100);Dechloromonas(97);	0.00422299	0.00304175	0.00854816	0.00779073	0.00716856	0.0123383	0.0125337
Otu000024	19593	Bacteria(100);Proteobacteria(100);Gammaproteobacteria(100);Xanthomonadales(100);Xanthomonadaceae(100);unclassified(100);	0.00828066	0.0284037	0.00552445	0.00108205	0.00187555	0.00149683	0.00326417
Otu000025	19563	Bacteria(100);Proteobacteria(100);Deltaproteobacteria(100);Bdellovibrionales(100);Bdellovibrionaceae(100);Bdellovibrio(100);	0.000159301	0.000565069	0.0038623	0.032804	0.00702729	0.00505556	0.000297563
Otu000026	19476	Bacteria(100);Proteobacteria(100);Gammaproteobacteria(100);Xanthomonadales(100);Xanthomonadaceae(100);Aquimonas(100);	0.00348659	0.0108746	0.0138442	0.00796206	0.00664557	0.00521787	0.001587
Otu000027	19256	Bacteria(100);unclassified(100);unclassified(100);unclassified(100);unclassified(100);unclassified(100);	0.0150615	0.00339041	0.0141387	0.0101352	0.00257287	0.00074541	0.00149683
Otu000028	19057	Bacteria(100);Bacteroidetes(100);Sphingobacteriia(100);Sphingobacteriales(100);Chitinophagaceae(100);Terrimonas(56);	0.0114517	0.00956709	0.00737595	0.00563566	0.00495337	0.00404866	0.00394045
Otu000029	19002	Bacteria(100);Proteobacteria(100);Gammaproteobacteria(100);Chromatiales(100);Chromatiaceae(100);Rheinheimera(100);	4.50853e-05	0.00909219	0.00736092	0.0144934	0.0120197	0.00426206	0.00123534
Otu000030	18130	Bacteria(100);Bacteroidetes(100);Flavobacteriia(100);Flavobacteriales(100);Flavobacteriaceae(100);Flavobacterium(100);	0.0363177	0.00431015	0.000646222	0.000213404	6.6125e-05	2.70512e-05	9.01705e-06
Otu000031	17004	Bacteria(100);Planctomycetes(100);Phycisphaerae(100);Phycisphaerales(100);Phycisphaeraceae(100);SM1A02(100);	0.0151817	0.00636303	0.00458667	0.00476701	0.00514573	0.00461072	0.000748415
Otu000032	14429	Bacteria(100);Proteobacteria(100);Deltaproteobacteria(100);Bdellovibrionales(100);Bdellovibrionaceae(100);Bdellovibrio(100);	0.00326718	0.000267506	0.000297563	0.000781478	0.000303574	0.00367896	0.0260142
Otu000033	13441	Bacteria(100);Proteobacteria(100);Betaproteobacteria(100);Burkholderiales(100);Comamonadaceae(100);unclassified(100);	0.00888781	0.00791697	0.005287	0.00394346	0.00394045	0.00181243	0.00120828
Otu000034	12521	Bacteria(100);Proteobacteria(100);Alphaproteobacteria(100);Caulobacterales(100);Hyphomonadaceae(100);Woodsholea(100);	0.000772461	0.00111811	0.00521186	0.00970235	0.00733687	0.00424703	0.00305678
Otu000035	12316	Bacteria(100);Proteobacteria(100);Alphaproteobacteria(100);unclassified(100);unclassified(100);unclassified(100);	0.00135556	0.00563265	0.0118183	0.00691007	0.00418692	0.00159902	0.000135256
Otu000036	10800	Bacteria(100);Bacteroidetes(100);Sphingobacteriia(100);Sphingobacteriales(100);Chitinophagaceae(100);unclassified(100);	0.00159602	0.00189659	0.00360381	0.00723769	0.00644419	0.00495337	0.00128042
Otu000037	9670	Bacteria(100);Bacteroidetes(100);Cytophagia(100);Cytophagales(100);Cytophagaceae(100);Chryseolinea(100);	0.00585507	0.00197774	0.00155995	0.00120227	0.00155995	0.00241056	0.00833176
Otu000038	9383	Bacteria(100);Cyanobacteria(100);Chloroplast(100);unclassified(100);unclassified(100);unclassified(100);	0.00137961	0.00178237	0.00561762	0.00359179	0.00489626	0.00416888	0.00182144
Otu000039	9180	Bacteria(100);Proteobacteria(100);Gammaproteobacteria(100);Xanthomonadales(100);Xanthomonadaceae(100);Thermomonas(100);	0.000601137	0.00114517	0.00191161	0.00289147	0.00641112	0.00491429	0.00499545
Otu000040	8972	Bacteria(100);Proteobacteria(100);Betaproteobacteria(100);Rhodocyclales(100);Rhodocyclaceae(100);Zoogloea(100);	0.000628188	0.00284638	0.00411178	0.00366994	0.00252177	0.00295459	0.00484216
Otu000041	8906	Bacteria(100);Cyanobacteria(100);unclassified(100);unclassified(100);unclassified(100);unclassified(100);	0.00887879	0.00513371	0.00372104	0.00140065	0.00123834	0.000931762	0.000279529
Otu000042	8163	Bacteria(100);Bacteroidetes(100);Sphingobacteriia(100);Sphingobacteriales(100);Saprospiraceae(100);unclassified(100);	0.00119927	0.00160804	0.00179439	0.00143371	0.00251275	0.00320706	0.00786287
Otu000043	8103	Bacteria(100);Proteobacteria(100);Gammaproteobacteria(100);Xanthomonadales(100);Xanthomonadaceae(100);Pseudoxanthomonas(100);	0.000949796	0.00120227	0.00217311	0.0032792	0.00560259	0.00368497	0.00345353
Otu000044	7467	Bacteria(100);Bacteroidetes(100);Sphingobacteriia(100);Sphingobacteriales(100);env.OPS_17(100);unclassified(100);	0.00122632	0.000976847	0.00197774	0.00276222	0.0022723	0.00361884	0.00519382
Otu000045	6867	Bacteria(100);Proteobacteria(100);Alphaproteobacteria(100);Rhizobiales(100);Methylobacteriaceae(97);Meganema(97);	0.000670267	0.000928756	0.0022723	0.00308684	0.00310487	0.00293355	0.00454459
Otu000046	6825	Bacteria(100);Proteobacteria(100);Betaproteobacteria(100);Burkholderiales(100);Comamonadaceae(100);unclassified(100);	0.00155093	0.00201681	0.00308083	0.00286742	0.00220016	0.00152689	0.00348058
Otu000047	6765	Bacteria(100);Proteobacteria(100);Betaproteobacteria(100);Rhodocyclales(100);Rhodocyclaceae(100);Zoogloea(100);	0.002645	0.00204386	0.0032281	0.00273517	0.00189358	0.00210398	0.00152388
Otu000048	6553	Bacteria(100);Proteobacteria(100);Alphaproteobacteria(100);Rhizobiales(100);Methylobacteriaceae(81);Meganema(81);	0.0015359	0.00115719	0.00199277	0.0034385	0.00356775	0.00262096	0.00219114
Otu000049	6481	Bacteria(100);Proteobacteria(100);Alphaproteobacteria(100);Sphingomonadales(100);Sphingomonadaceae(99);Novosphingobium(97);	0.000495938	0.000655239	0.00155093	0.00325215	0.00479407	0.00269009	0.00282234
Otu000050	6240	Bacteria(100);Proteobacteria(100);Gammaproteobacteria(100);Xanthomonadales(100);Xanthomonadaceae(100);Dokdonella(100);	0.00165613	0.00149382	0.00125036	0.00150585	0.00268708	0.00209797	0.00485117
Otu000051	5956	Bacteria(100);Bacteroidetes(100);Flavobacteriia(100);Flavobacteriales(100);Flavobacteriaceae(100);Cloacibacterium(100);	0.0109948	0.00176734	0.000574086	0.000177335	0.00015329	4.50853e-05	0
Otu000052	5955	Bacteria(100);Nitrospirae(100);Nitrospira(100);Nitrospirales(100);Nitrospiraceae(100);Nitrospira(100);	0.0122752	0.000709341	0.000231438	9.01705e-05	4.80909e-05	4.80909e-05	4.50853e-05
Otu000053	5922	Bacteria(100);Proteobacteria(100);Betaproteobacteria(100);Rhodocyclales(100);Rhodocyclaceae(100);Azospira(99);	0.000123233	0.0013225	0.00323111	0.0030117	0.00214005	0.00214305	0.00293054
Otu000054	5690	Bacteria(100);Proteobacteria(100);Betaproteobacteria(100);Rhodocyclales(100);Rhodocyclaceae(100);Zoogloea(100);	0.000255483	0.00074541	0.00217612	0.00334533	0.00223923	0.00316198	0.00187555
Otu000055	5400	Bacteria(100);Chlorobi(100);Chlorobia(100);Chlorobiales(100);SJA-28(100);unclassified(100);	0.000718358	0.000117222	0.000204386	0.00110309	0.00291251	0.00394646	0.00421096
Otu000056	5337	Bacteria(100);Proteobacteria(100);Betaproteobacteria(100);Burkholderiales(100);Comamonadaceae(100);unclassified(60);	0.00385028	0.00176734	0.00219114	0.0018515	0.0015329	0.000754427	0.00108205
Otu000057	5068	Bacteria(100);Bacteroidetes(100);Flavobacteriia(100);Flavobacteriales(100);Flavobacteriaceae(100);Flavobacterium(100);	0.000411779	0.00339642	0.00188456	0.00321308	0.00169521	0.000748415	0.00174029
Otu000058	4897	Bacteria(100);Acidobacteria(100);Acidobacteria(100);Subgroup_4(100);Unknown_Family(100);Blastocatella(100);	0.00879162	0.00195971	0.000390739	4.80909e-05	2.70512e-05	6.01137e-06	0
Otu000059	4648	Bacteria(100);Proteobacteria(100);Gammaproteobacteria(100);unclassified(100);unclassified(100);unclassified(100);	0.00732485	0.00199577	0.000919739	0.000258489	0.000126239	0.000102193	9.01705e-05
Otu000060	4499	Bacteria(100);Chloroflexi(100);Anaerolineae(100);Anaerolineales(100);Anaerolineaceae(100);unclassified(100);	0.000628188	0.000706336	0.00151186	0.00163509	0.00247368	0.00227831	0.00172226
Otu000061	4385	Bacteria(100);Proteobacteria(100);Alphaproteobacteria(100);Rickettsiales(100);SM2D12(100);unclassified(100);	1.50284e-05	2.10398e-05	6.31194e-05	0.00425905	0.00447246	0.00201982	0.000297563
Otu000062	4309	Bacteria(100);Bacteroidetes(100);Sphingobacteriia(100);Sphingobacteriales(100);KD3-93(100);unclassified(100);	0.00165914	0.00221218	0.00380219	0.00127441	0.00101592	0.000751421	0.000117222
Otu000063	4233	Bacteria(100);Bacteroidetes(100);Cytophagia(100);Cytophagales(100);Cytophagaceae(98);unclassified(98);	0.0067177	0.00165613	0.00070333	0.000255483	0.000135256	0.000141267	0.000252477
Otu000064	4184	Bacteria(100);Proteobacteria(100);Betaproteobacteria(100);Burkholderiales(100);Comamonadaceae(100);unclassified(100);	0.00442437	0.00316498	0.00149382	0.00041779	0.00032762	0.000138261	0.000144273
Otu000065	4026	Bacteria(100);Proteobacteria(100);Gammaproteobacteria(100);unclassified(100);unclassified(100);unclassified(100);	0.00229935	0.00109407	0.00167417	0.000805523	0.00120528	0.00112413	0.00151486
Otu000066	3858	Bacteria(100);Proteobacteria(100);unclassified(100);unclassified(100);unclassified(100);unclassified(100);	0	3.90739e-05	9.31762e-05	0.0020078	0.00299667	0.00328221	0.0011632
Otu000067	3751	Bacteria(100);Spirochaetae(100);Spirochaetes(100);Spirochaetales(100);Leptospiraceae(100);Turneriella(100);	0.000925751	0.00263899	0.00215207	0.00120528	0.00068229	0.000601137	0.00143371
Otu000068	3693	Bacteria(100);Bacteroidetes(100);Sphingobacteriia(100);Sphingobacteriales(100);unclassified(100);unclassified(100);	6.01137e-06	6.01137e-06	0.00716254	0.000805523	0.00098887	0.000300568	0.000171324
Otu000069	3638	Bacteria(100);Proteobacteria(100);Gammaproteobacteria(100);Xanthomonadales(100);Xanthomonadaceae(100);Pseudoxanthomonas(100);	0.00140365	0.0012143	0.00166815	0.00125337	0.00164411	0.00140967	0.000504955
Otu000070	3541	Bacteria(100);Planctomycetes(100);Phycisphaerae(100);Phycisphaerales(100);Phycisphaeraceae(100);SM1A02(100);	0.00524492	0.00231438	0.000297563	0.000201381	0.000108205	8.71648e-05	8.11535e-05
Otu000071	3535	Bacteria(100);Chlorobi(100);Chlorobia(100);Chlorobiales(100);OPB56(100);unclassified(100);	0.000529	0.000565069	0.00284939	0.00142469	0.00105199	0.00108505	0.00135256
Otu000072	3340	Bacteria(100);Bacteroidetes(100);Sphingobacteriia(100);Sphingobacteriales(100);Chitinophagaceae(100);Sediminibacterium(100);	0.00742404	2.40455e-05	9.01705e-06	0	0	0	0
Otu000073	2950	Bacteria(100);Bacteroidetes(100);Sphingobacteriia(100);Sphingobacteriales(100);NS11-12_marine_group(100);unclassified(100);	0.0033303	0.000360682	0.000432818	0.00286141	0.000102193	6.01137e-06	9.01705e-06
Otu000074	2878	Bacteria(100);Candidate_division_TM7(100);unclassified(100);unclassified(100);unclassified(100);unclassified(100);	0.00624281	0.000288546	4.20796e-05	0	3.00568e-06	0	0
Otu000075	2872	Bacteria(100);Proteobacteria(100);Alphaproteobacteria(100);Rickettsiales(100);Rickettsiaceae(100);Rickettsia(100);	8.11535e-05	2.10398e-05	0.00017433	0.000384728	0.000462875	0.00421397	0.00125337
Otu000076	2844	Bacteria(100);Verrucomicrobia(100);Verrucomicrobiae(100);Verrucomicrobiales(100);Verrucomicrobiaceae(100);Prosthecobacter(100);	0.000568074	8.41591e-05	0.0019056	0.00166214	0.000970836	0.0012143	0.000676279
Otu000077	2753	Bacteria(100);Proteobacteria(100);Betaproteobacteria(100);Rhodocyclales(100);Rhodocyclaceae(100);Thauera(100);	0.000901705	0.00268708	0.00129244	0.000865637	0.000414784	0.000321608	0.00045987
Otu000078	2746	Bacteria(100);Chloroflexi(100);Chloroflexia(100);Chloroflexales(100);Roseiflexaceae(100);Roseiflexus(100);	0.00129244	0.000865637	0.00133753	0.000853614	0.00098887	0.000706336	0.000892688
Otu000079	2705	Bacteria(100);Proteobacteria(100);Alphaproteobacteria(100);DB1-14(100);unclassified(100);unclassified(100);	0.00109106	0.000240455	0.000420796	0.000525995	0.000348659	0.000213404	0.00339943
Otu000080	2660	Bacteria(100);Chlorobi(100);unclassified(100);unclassified(100);unclassified(100);unclassified(100);	0.00364589	0.0011091	0.00101292	0.000282534	0.000147279	8.41591e-05	0
Otu000081	2608	Bacteria(100);Proteobacteria(100);Alphaproteobacteria(100);Rhodobacterales(100);Rhodobacteraceae(100);Rhodobacter(98);	0.00105199	0.000763444	0.000658245	0.000937773	0.0011091	0.00100991	0.000883671
Otu000082	2364	Bacteria(100);Proteobacteria(100);Alphaproteobacteria(100);Rickettsiales(100);SM2D12(100);unclassified(100);	0.00265702	0.00134354	0.0011121	0.000267506	0.000147279	9.01705e-05	1.80341e-05
Otu000083	2341	Bacteria(100);Proteobacteria(100);Alphaproteobacteria(100);DB1-14(100);unclassified(100);unclassified(100);	0.00403964	0.00108806	0.000294557	3.30625e-05	3.60682e-05	1.50284e-05	0
Otu000084	2243	Bacteria(100);Bacteroidetes(100);Flavobacteriia(100);Flavobacteriales(100);Flavobacteriaceae(100);Myroides(100);	0.00489926	6.01137e-06	3.00568e-06	0	0	0	0
Otu000085	2238	Bacteria(100);Proteobacteria(100);Alphaproteobacteria(100);Rhodobacterales(100);Rhodobacteraceae(100);Gemmobacter(98);	0.00261795	0.000931762	0.000507961	0.000525995	0.000420796	0.000222421	8.11535e-05
Otu000086	2119	Bacteria(100);Proteobacteria(100);Deltaproteobacteria(100);Myxococcales(100);Sandaracinaceae(100);Sandaracinus(100);	4.50853e-05	5.10966e-05	0.000204386	0.000183347	0.000423801	0.00074541	0.00293054
Otu000087	2087	Bacteria(100);Bacteroidetes(100);Sphingobacteriia(100);Sphingobacteriales(100);unclassified(100);unclassified(100);	0.00241056	0.000120227	0.000691307	0.00150284	0.000411779	5.7108e-05	0
Otu000088	2060	Bacteria(100);Proteobacteria(100);Betaproteobacteria(100);Burkholderiales(100);Comamonadaceae(100);Rubrivivax(94);	0.00111511	0.00132551	0.00115118	0.000501949	0.000408773	0.000270512	0.000324614
Otu000089	2005	Bacteria(100);Bacteroidetes(100);Flavobacteriia(100);Flavobacteriales(100);Flavobacteriaceae(100);Flavobacterium(99);	0.000808529	0.00132851	0.00109407	0.000976847	0.000628188	0.000279529	6.31194e-05
Otu000090	1967	Bacteria(100);Proteobacteria(100);Betaproteobacteria(100);B1-7BS(100);unclassified(100);unclassified(100);	0.00144874	0.000477904	0.000450853	0.000342648	0.000495938	0.000510966	0.000730381
Otu000091	1961	Bacteria(100);SHA-109(100);unclassified(100);unclassified(100);unclassified(100);unclassified(100);	0.00363688	0.000444841	0.000150284	7.21364e-05	8.11535e-05	3.60682e-05	2.70512e-05
Otu000092	1939	Bacteria(100);Proteobacteria(100);Betaproteobacteria(100);Rhodocyclales(100);Rhodocyclaceae(100);Methyloversatilis(100);	0.000700324	0.000607148	0.00143972	0.000769455	0.000580097	0.000429813	0.000279529
Otu000093	1927	Bacteria(100);Proteobacteria(100);Alphaproteobacteria(100);Rhodobacterales(100);Rhodobacteraceae(100);unclassified(98);	0.000610154	0.000357676	0.000297563	0.000733387	0.000868643	0.000832574	0.000955807
Otu000094	1856	Bacteria(100);Bacteroidetes(100);Sphingobacteriia(100);Sphingobacteriales(100);Chitinophagaceae(100);Terrimonas(100);	0.00268708	0.00114517	0.000330625	9.91876e-05	7.81478e-05	2.40455e-05	3.60682e-05
Otu000095	1843	Bacteria(100);Bacteroidetes(100);Flavobacteriia(100);Flavobacteriales(100);Flavobacteriaceae(100);Myroides(100);	0.00412981	0	0	0	0	0	0
Otu000096	1818	Bacteria(100);Verrucomicrobia(100);Verrucomicrobiae(100);Verrucomicrobiales(100);Verrucomicrobiaceae(100);Luteolibacter(100);	0.00278627	0.000219415	0.000943785	0.000255483	6.31194e-05	5.41023e-05	0
Otu000097	1799	Bacteria(100);Chloroflexi(100);Anaerolineae(100);Anaerolineales(100);Anaerolineaceae(100);unclassified(100);	0.000147279	0.000270512	0.000691307	0.000883671	0.00114216	0.00103396	0.000369699
Otu000098	1759	Bacteria(100);Acidobacteria(100);Acidobacteria(100);Subgroup_4(100);Unknown_Family(100);Blastocatella(100);	0.00204086	0.0015359	0.000390739	0.000117222	9.31762e-05	6.31194e-05	3.60682e-05
Otu000099	1748	Bacteria(100);Proteobacteria(100);Betaproteobacteria(100);Rhodocyclales(100);Rhodocyclaceae(100);unclassified(100);	0.000904711	0.0010069	0.000895694	0.00045987	0.000610154	0.000360682	3.60682e-05
Otu000100	1726	Bacteria(100);Chloroflexi(100);Anaerolineae(100);Anaerolineales(100);Anaerolineaceae(100);unclassified(100);	0.00011121	0.00039675	0.000883671	0.00074541	0.000850609	0.000697319	0.000595125
Otu000101	1681	Bacteria(100);Proteobacteria(100);unclassified(100);unclassified(100);unclassified(100);unclassified(100);	0	0.000114216	0.00346255	3.60682e-05	1.50284e-05	2.40455e-05	0.000486921
Otu000102	1654	Bacteria(100);Proteobacteria(100);Gammaproteobacteria(100);Enterobacteriales(100);Enterobacteriaceae(100);Providencia(100);	0.00361884	6.01137e-05	6.01137e-06	3.00568e-06	0	0	0
Otu000103	1615	Bacteria(100);Chlorobi(100);Ignavibacteria(100);Ignavibacteriales(100);Ignavibacteriaceae(100);Ignavibacterium(100);	0.00275321	0.000574086	0.000228432	8.11535e-05	3.30625e-05	2.10398e-05	0
Otu000104	1610	Bacteria(100);Proteobacteria(100);Betaproteobacteria(100);Rhodocyclales(100);Rhodocyclaceae(100);Sulfuritalea(100);	0.000351665	0.000270512	0.000339642	0.000309585	0.000712347	0.000598131	0.0012173
Otu000105	1602	Bacteria(100);Bacteroidetes(100);Sphingobacteriia(100);Sphingobacteriales(100);Chitinophagaceae(100);unclassified(100);	0.000727375	0.00017433	0.00137961	0.00146978	0.000156296	8.41591e-05	3.60682e-05
Otu000106	1594	Bacteria(100);Proteobacteria(100);Alphaproteobacteria(100);Rhodobacterales(100);Rhodobacteraceae(100);Rhodobacter(98);	0.000628188	0.000583103	0.000462875	0.000862631	0.000730381	0.000420796	0.000252477
Otu000107	1566	Bacteria(100);Proteobacteria(100);Alphaproteobacteria(100);Caulobacterales(100);Caulobacteraceae(100);Caulobacter(64);	0.00193566	0.000219415	0.000339642	0.000408773	0.000369699	0.000168318	0.000180341
Otu000108	1522	Bacteria(100);Acidobacteria(100);Acidobacteria(100);Subgroup_4(100);11-24(100);unclassified(100);	2.40455e-05	3.00568e-06	2.70512e-05	0.000108205	0.00013225	0.000237449	0.00261494
Otu000109	1423	Bacteria(100);Proteobacteria(100);Alphaproteobacteria(100);Rhodospirillales(100);Rhodospirillaceae(100);Defluviicoccus(100);	0.00144273	0.000393745	0.000492932	0.000138261	0.000177335	0.000333631	0.000477904
Otu000110	1396	Bacteria(100);Planctomycetes(100);OM190(100);unclassified(100);unclassified(100);unclassified(100);	0.000129244	0.000324614	0.000447847	0.000748415	0.000246466	0.000273517	0.0012714
Otu000111	1340	Bacteria(100);Proteobacteria(100);Alphaproteobacteria(100);Caulobacterales(100);Caulobacteraceae(100);unclassified(96);	0.00263899	8.41591e-05	6.01137e-05	4.80909e-05	5.10966e-05	2.10398e-05	3.60682e-05
Otu000112	1339	Bacteria(100);Verrucomicrobia(100);OPB35_soil_group(100);unclassified(100);unclassified(100);unclassified(100);	0.000222421	0.000249472	0.000631194	0.000435824	0.000553046	0.000688302	0.000658245
Otu000113	1316	Bacteria(100);Chloroflexi(100);Anaerolineae(100);Anaerolineales(100);Anaerolineaceae(100);unclassified(100);	0.000820552	0.000622177	0.000625182	0.000333631	0.000312591	0.000315597	0.000171324
Otu000114	1292	Bacteria(100);Chloroflexi(100);Caldilineae(100);Caldilineales(100);Caldilineaceae(100);unclassified(100);	9.91876e-05	5.10966e-05	0.000246466	0.000426807	0.000685296	0.000736393	0.00104598
Otu000115	1195	Bacteria(100);Proteobacteria(100);Alphaproteobacteria(100);Rickettsiales(100);Rickettsiales_Incertae_Sedis(100);Candidatus_Captivus(100);	3.00568e-06	0.000294557	0.00266304	9.31762e-05	1.80341e-05	9.01705e-06	0
Otu000116	1186	Bacteria(100);Bacteroidetes(100);Cytophagia(100);Cytophagales(100);Cytophagaceae(100);Runella(100);	0.00141868	0.000234443	0.000186352	0.000120227	0.000129244	0.000228432	0.000450853
Otu000117	1181	Bacteria(100);Bacteroidetes(100);Sphingobacteriia(100);Sphingobacteriales(100);NS11-12_marine_group(100);unclassified(100);	0.000525995	0.000541023	0.00103696	0.000474898	0.000207392	7.51421e-05	0.000108205
Otu000118	1171	Bacteria(100);Proteobacteria(100);Betaproteobacteria(100);Rhodocyclales(100);Rhodocyclaceae(100);Uliginosibacterium(100);	0.000300568	0.00013225	0.000441836	0.00070333	0.000754427	0.000495938	7.21364e-05
Otu000119	1170	Bacteria(100);Cyanobacteria(100);Cyanobacteria(100);SubsectionIII(100);FamilyI(100);Leptolyngbya(100);	0	0	1.50284e-05	0.000114216	0.0002645	0.00057108	0.00160504
Otu000120	1136	Bacteria(100);Proteobacteria(100);Betaproteobacteria(100);Nitrosomonadales(100);Nitrosomonadaceae(100);Nitrosomonas(100);	0.00170723	0.000321608	0.000234443	0.000231438	0.000102193	9.91876e-05	2.70512e-05
Otu000121	1049	Bacteria(100);Proteobacteria(100);Alphaproteobacteria(100);Rickettsiales(100);unclassified(100);unclassified(100);	0	0	0	6.01137e-06	6.91307e-05	0.000658245	0.00170422
Otu000122	1030	Bacteria(100);Candidate_division_TM7(100);unclassified(100);unclassified(100);unclassified(100);unclassified(100);	0.0021671	9.61819e-05	6.01137e-06	0	0	0	0
Otu000123	995	Bacteria(100);Bacteroidetes(100);unclassified(100);unclassified(100);unclassified(100);unclassified(100);	0.00192664	0.000138261	0.000117222	3.60682e-05	1.20227e-05	9.01705e-06	0
Otu000124	994	Bacteria(100);Proteobacteria(100);Alphaproteobacteria(100);Sphingomonadales(100);Sphingomonadaceae(98);Sphingopyxis(98);	0.000922745	0.000444841	0.00039675	0.0002645	0.000165313	0.000123233	8.11535e-05
Otu000125	969	Bacteria(100);Acidobacteria(100);Acidobacteria(100);Subgroup_3(100);Unknown_Family(99);Bryobacter(99);	0.000435824	0.000222421	0.000228432	0.000291551	0.000225426	0.000282534	0.000613159
Otu000126	957	Bacteria(100);Planctomycetes(100);vadinHA49(100);unclassified(100);unclassified(100);unclassified(100);	3.00568e-06	0.00017433	0.000240455	0.000679285	0.00032762	0.000784483	0.000198375
Otu000127	933	Bacteria(100);Bacteroidetes(100);Cytophagia(100);Cytophagales(100);Cytophagaceae(100);Cytophaga(100);	0.00142469	0.000282534	0.000171324	0.000273517	6.01137e-06	2.10398e-05	1.80341e-05
Otu000128	932	Bacteria(100);Proteobacteria(100);Alphaproteobacteria(100);DB1-14(100);unclassified(100);unclassified(100);	0.00104898	0.000847603	0.000312591	6.01137e-05	3.00568e-05	6.01137e-06	0
Otu000129	923	Bacteria(100);Bacteroidetes(100);Cytophagia(100);unclassified(100);unclassified(100);unclassified(100);	0.00199277	2.40455e-05	1.20227e-05	3.00568e-05	1.50284e-05	0	0
Otu000130	916	Bacteria(100);Proteobacteria(100);Alphaproteobacteria(100);unclassified(100);unclassified(100);unclassified(100);	0.00110609	8.71648e-05	6.01137e-05	4.20796e-05	9.01705e-05	0.000309585	0.000342648
Otu000131	898	Bacteria(100);Bacteroidetes(100);Cytophagia(100);Cytophagales(100);Cytophagaceae(100);Ohtaekwangia(100);	0.00167717	0.000339642	0.000102193	1.20227e-05	6.01137e-06	3.00568e-06	0
Otu000132	861	Bacteria(100);Proteobacteria(100);Betaproteobacteria(100);Rhodocyclales(100);Rhodocyclaceae(100);Zoogloea(100);	6.01137e-06	2.10398e-05	0.00120227	0.000381722	0.000261494	2.40455e-05	1.80341e-05
Otu000133	835	Bacteria(100);Chloroflexi(100);Caldilineae(100);Caldilineales(100);Caldilineaceae(100);unclassified(100);	0.000297563	0.000192364	0.000303574	0.000276523	0.000303574	0.000432818	0.000315597
Otu000134	827	Bacteria(100);Bacteroidetes(100);Sphingobacteriia(100);Sphingobacteriales(100);env.OPS_17(100);unclassified(100);	5.10966e-05	0.00143371	9.61819e-05	7.21364e-05	0.000270512	0.000123233	4.50853e-05
Otu000135	809	Bacteria(100);unclassified(100);unclassified(100);unclassified(100);unclassified(100);unclassified(100);	0.000279529	0.000135256	0.000354671	0.000336637	0.000195369	0.000189358	0.000504955
Otu000136	791	Bacteria(100);Acidobacteria(100);Acidobacteria(100);Subgroup_4(100);Unknown_Family(100);Blastocatella(100);	0.00118123	0.000516978	0.000126239	2.70512e-05	1.80341e-05	1.50284e-05	9.01705e-06
Otu000137	785	Bacteria(100);Planctomycetes(100);Phycisphaerae(100);Phycisphaerales(100);Phycisphaeraceae(100);CL500-3(100);	3.00568e-06	4.80909e-05	0.000225426	0.000595125	0.000559057	0.000426807	0.000171324
Otu000138	771	Bacteria(100);Proteobacteria(100);Alphaproteobacteria(100);unclassified(100);unclassified(100);unclassified(100);	0.00037571	0.00149082	0.000120227	1.80341e-05	6.01137e-06	0	0
Otu000139	762	Bacteria(100);Candidate_division_TM7(100);unclassified(100);unclassified(100);unclassified(100);unclassified(100);	0.00163509	6.01137e-05	3.00568e-06	3.00568e-06	3.00568e-06	0	0
Otu000140	761	Bacteria(100);Bacteroidetes(100);Sphingobacteriia(100);Sphingobacteriales(100);Saprospiraceae(100);unclassified(100);	0.000862631	0.000453858	0.000246466	0.00015329	7.81478e-05	4.50853e-05	9.01705e-06
Otu000141	748	Bacteria(100);Planctomycetes(100);Phycisphaerae(100);Phycisphaerales(100);Phycisphaeraceae(100);SM1A02(99);	2.70512e-05	9.61819e-05	7.81478e-05	0.000294557	0.000195369	0.000168318	0.000730381
Otu000142	735	Bacteria(100);Bacteroidetes(100);Sphingobacteriia(100);Sphingobacteriales(100);unclassified(100);unclassified(100);	0.00154793	2.10398e-05	3.30625e-05	3.00568e-06	0	0	0
Otu000143	715	Bacteria(100);Proteobacteria(100);Alphaproteobacteria(100);Rhodospirillales(100);I-10(100);unclassified(100);	0.000535012	0.000294557	0.000249472	0.000162307	0.000105199	0.000123233	0.00030658
Otu000144	712	Bacteria(100);Verrucomicrobia(100);Verrucomicrobiae(100);Verrucomicrobiales(100);Verrucomicrobiaceae(100);Prosthecobacter(100);	0.000622177	0.000168318	0.00032762	0.000165313	0.000102193	0.000165313	0.000198375
Otu000145	709	Bacteria(100);Proteobacteria(100);Betaproteobacteria(100);Rhodocyclales(100);Rhodocyclaceae(100);unclassified(100);	0.000189358	0.000513972	0.00039675	0.000288546	0.000141267	0.000150284	0.000144273
Otu000146	704	Bacteria(100);Candidate_division_TM7(100);unclassified(100);unclassified(100);unclassified(100);unclassified(100);	0.00147279	6.6125e-05	6.01137e-06	0	3.00568e-06	0	0
Otu000147	698	Bacteria(100);Proteobacteria(100);Alphaproteobacteria(100);Rhizobiales(100);Phyllobacteriaceae(100);Mesorhizobium(59);	0.00110008	0.000228432	3.90739e-05	5.10966e-05	0.000108205	4.50853e-05	5.41023e-05
Otu000148	694	Bacteria(100);Proteobacteria(100);Alphaproteobacteria(100);Rhizobiales(100);unclassified(100);unclassified(100);	0.000261494	0.000270512	0.000321608	0.0002645	0.000267506	0.000213404	0.000117222
Otu000149	691	Bacteria(100);Proteobacteria(100);Alphaproteobacteria(100);Rhodobacterales(100);Rhodobacteraceae(100);Defluviimonas(99);	0.00109407	0.000279529	8.41591e-05	5.7108e-05	5.10966e-05	2.70512e-05	0
Otu000150	691	Bacteria(100);Armatimonadetes(100);unclassified(100);unclassified(100);unclassified(100);unclassified(100);	0	0	0	9.01705e-06	9.31762e-05	0.000222421	0.00131649
Otu000151	687	Bacteria(100);Bacteroidetes(100);unclassified(100);unclassified(100);unclassified(100);unclassified(100);	0.000321608	0.00133452	2.70512e-05	4.20796e-05	3.00568e-06	0	0
Otu000152	655	Bacteria(100);Proteobacteria(100);Alphaproteobacteria(100);Rhodospirillales(100);Rhodospirillales_Incertae_Sedis(100);Reyranella(100);	0.00108505	9.31762e-05	8.41591e-05	9.31762e-05	4.50853e-05	6.31194e-05	9.91876e-05
Otu000153	652	Bacteria(100);Proteobacteria(100);Deltaproteobacteria(100);unclassified(100);unclassified(100);unclassified(100);	0.000574086	3.00568e-06	0.000234443	0.00068229	6.91307e-05	0	9.01705e-06
Otu000154	641	Bacteria(100);Bacteroidetes(100);Bacteroidia(100);Bacteroidales(100);Rikenellaceae(100);Blvii28_wastewater-sludge_group(100);	0.00141267	6.01137e-05	0	0	0	0	0
Otu000155	639	Bacteria(100);Bacteroidetes(100);unclassified(100);unclassified(100);unclassified(100);unclassified(100);	2.10398e-05	0.000450853	0.000553046	0.000108205	3.00568e-05	0.000237449	0.000234443
Otu000156	619	Bacteria(100);Proteobacteria(100);Alphaproteobacteria(100);Rhizobiales(100);unclassified(59);unclassified(59);	0.000195369	6.91307e-05	0.000129244	0.000213404	0.000258489	0.000351665	0.000333631
Otu000157	617	Bacteria(100);Acidobacteria(100);Acidobacteria(100);unclassified(100);unclassified(100);unclassified(100);	0.000796506	9.31762e-05	6.01137e-06	1.20227e-05	0	1.80341e-05	0.000369699
Otu000158	610	Bacteria(100);Proteobacteria(100);Deltaproteobacteria(100);Myxococcales(100);Cystobacteraceae(100);unclassified(100);	6.31194e-05	6.01137e-05	0.000604142	0.000192364	0.00013225	0.000192364	0.000261494
Otu000159	599	Bacteria(100);Proteobacteria(100);Gammaproteobacteria(100);Legionellales(100);Legionellaceae(100);Legionella(100);	3.00568e-06	0	9.31762e-05	0.00129244	0.000135256	1.20227e-05	0
Otu000160	585	Bacteria(100);Firmicutes(100);Clostridia(100);Clostridiales(100);Family_XII(100);Fusibacter(100);	0.00125337	4.20796e-05	3.00568e-06	0	0	0	0
Otu000161	585	Bacteria(100);Bacteroidetes(100);Cytophagia(100);Cytophagales(100);Cytophagaceae(100);Ohtaekwangia(100);	0.000691307	0.000303574	6.91307e-05	3.90739e-05	1.80341e-05	5.10966e-05	0.000189358
Otu000162	576	Bacteria(100);Planctomycetes(100);Planctomycetacia(100);Planctomycetales(100);Planctomycetaceae(100);Pirellula(100);	0.000105199	0.000267506	0.000135256	0.000126239	0.000102193	0.000450853	0.000207392
Otu000163	569	Bacteria(100);Proteobacteria(100);Betaproteobacteria(100);SC-I-84(100);unclassified(100);unclassified(100);	0.000156296	0.000162307	0.000201381	0.000162307	0.000252477	0.000189358	0.000180341
Otu000164	569	Bacteria(100);Proteobacteria(100);Betaproteobacteria(100);Rhodocyclales(100);Rhodocyclaceae(100);unclassified(100);	9.01705e-06	0.000465881	0.000405767	0.000216409	0.00024346	8.41591e-05	4.50853e-05
Otu000165	565	Bacteria(100);Proteobacteria(100);Alphaproteobacteria(100);Sphingomonadales(100);Sphingomonadaceae(100);unclassified(100);	0.000333631	0.000195369	0.000180341	0.000198375	0.000237449	0.000159301	8.11535e-05
Otu000166	555	Bacteria(100);Proteobacteria(100);Betaproteobacteria(100);Rhodocyclales(100);Rhodocyclaceae(100);unclassified(99);	8.11535e-05	4.20796e-05	3.90739e-05	0.000228432	0.00070333	0.000222421	3.60682e-05
Otu000167	550	Bacteria(100);Bacteroidetes(100);Cytophagia(100);Cytophagales(100);unclassified(100);unclassified(100);	0.00106101	0.000159301	1.50284e-05	1.50284e-05	0	0	9.01705e-06
Otu000168	529	Bacteria(100);Chlamydiae(100);Chlamydiae(100);Chlamydiales(100);Parachlamydiaceae(100);Candidatus_Protochlamydia(100);	1.50284e-05	3.00568e-05	0.000102193	0.000165313	0.000321608	0.000426807	0.000288546
Otu000169	528	Bacteria(100);Proteobacteria(100);Alphaproteobacteria(100);Rhizobiales(100);Hyphomicrobiaceae(100);Devosia(99);	0.000568074	0.000117222	0.000117222	0.000108205	0.000144273	0.000102193	7.21364e-05
Otu000170	503	Bacteria(100);Gemmatimonadetes(100);Gemmatimonadetes(100);Gemmatimonadales(100);Gemmatimonadaceae(100);unclassified(100);	0.00105199	6.01137e-05	6.01137e-06	0	0	6.01137e-06	0
Otu000171	491	Bacteria(100);Proteobacteria(100);Gammaproteobacteria(100);unclassified(100);unclassified(100);unclassified(100);	9.91876e-05	0.000772461	0.000390739	3.00568e-06	1.50284e-05	3.00568e-06	9.01705e-06
Otu000172	472	Bacteria(100);Acidobacteria(100);Acidobacteria(100);Subgroup_4(100);11-24(100);unclassified(100);	0.000712347	0.000147279	7.51421e-05	5.41023e-05	6.31194e-05	1.50284e-05	9.01705e-06
Otu000173	467	Bacteria(100);Planctomycetes(100);Planctomycetacia(100);Planctomycetales(100);Planctomycetaceae(100);unclassified(98);	0.000105199	5.41023e-05	0.00011121	0.000105199	0.000162307	0.000147279	0.000450853
Otu000174	460	Bacteria(100);Chloroflexi(100);Caldilineae(100);Caldilineales(100);Caldilineaceae(100);unclassified(100);	0.000108205	7.21364e-05	0.000123233	0.000147279	0.000168318	0.000210398	0.000261494
Otu000175	447	Bacteria(100);Candidate_division_TM7(100);unclassified(100);unclassified(100);unclassified(100);unclassified(100);	0.000303574	0.000360682	0.000219415	0.000156296	4.80909e-05	9.01705e-06	0
Otu000176	410	Bacteria(100);Proteobacteria(100);Alphaproteobacteria(100);Rickettsiales(100);SM2D12(100);unclassified(100);	0.000766449	4.50853e-05	2.40455e-05	1.80341e-05	3.00568e-06	3.00568e-06	4.50853e-05
Otu000177	409	Bacteria(100);Bacteroidetes(100);Sphingobacteriia(100);Sphingobacteriales(100);PHOS-HE51(100);unclassified(100);	0.000673273	0.00024346	9.01705e-06	0	0	0	0
Otu000178	407	Bacteria(100);Proteobacteria(100);Betaproteobacteria(100);unclassified(100);unclassified(100);unclassified(100);	4.20796e-05	8.11535e-05	0.000129244	0.000135256	0.000129244	0.00011121	0.000405767
Otu000179	407	Bacteria(100);Chloroflexi(100);Anaerolineae(100);Anaerolineales(100);Anaerolineaceae(100);unclassified(100);	0.000270512	0.00015329	0.000180341	0.000141267	0.000135256	0.000114216	5.41023e-05
Otu000180	390	Bacteria(100);Proteobacteria(100);Alphaproteobacteria(100);Rhodospirillales(100);Rhodospirillales_Incertae_Sedis(100);Reyranella(100);	0.000258489	0.000129244	0.000120227	5.41023e-05	9.31762e-05	0.000129244	0.000135256
Otu000181	386	Bacteria(100);Proteobacteria(100);Alphaproteobacteria(100);Sphingomonadales(100);unclassified(94);unclassified(94);	0.000577091	0.000144273	2.70512e-05	7.81478e-05	6.31194e-05	3.30625e-05	9.01705e-06
Otu000182	385	Bacteria(100);Proteobacteria(100);SPOTSOCT00m83(100);unclassified(100);unclassified(100);unclassified(100);	8.11535e-05	7.51421e-05	0.000183347	9.61819e-05	9.91876e-05	0.000150284	0.000288546
Otu000183	382	Bacteria(100);Candidate_division_TM7(100);unclassified(100);unclassified(100);unclassified(100);unclassified(100);	0.000667262	0.000198375	6.01137e-06	0	0	3.00568e-06	0
Otu000184	368	Bacteria(100);Verrucomicrobia(100);OPB35_soil_group(100);unclassified(100);unclassified(100);unclassified(100);	6.01137e-06	6.01137e-06	4.20796e-05	0.000126239	0.000126239	0.000234443	0.000369699
Otu000185	366	Bacteria(100);Proteobacteria(100);Alphaproteobacteria(100);Rhizobiales(100);JG35-K1-AG5(100);unclassified(100);	0.000123233	0.000102193	0.000123233	9.61819e-05	0.00015329	0.000135256	0.000135256
Otu000186	365	Bacteria(100);Chlorobi(100);Chlorobia(100);Chlorobiales(100);OPB56(100);unclassified(100);	0.00041779	0.00024346	6.01137e-05	9.01705e-06	3.00568e-06	0.000108205	3.60682e-05
Otu000187	362	Bacteria(100);Cyanobacteria(100);Melainabacteria(100);Obscuribacterales(100);unclassified(100);unclassified(100);	0.000583103	0.000138261	6.01137e-05	1.50284e-05	1.50284e-05	2.10398e-05	0
Otu000188	361	Bacteria(100);Planctomycetes(100);Phycisphaerae(100);Phycisphaerales(100);Phycisphaeraceae(100);SM1A02(100);	6.91307e-05	0.000108205	9.61819e-05	0.000195369	0.000126239	0.000126239	6.31194e-05
Otu000189	358	Bacteria(100);unclassified(100);unclassified(100);unclassified(100);unclassified(100);unclassified(100);	3.00568e-05	5.10966e-05	0.000246466	0.00015329	0.000204386	7.51421e-05	0.000126239
Otu000190	355	Bacteria(100);Proteobacteria(100);Betaproteobacteria(100);Burkholderiales(100);Comamonadaceae(100);Diaphorobacter(97);	0.000105199	0.000150284	0.000225426	0.000183347	0.000138261	6.91307e-05	2.70512e-05
Otu000191	349	Bacteria(100);Planctomycetes(100);OM190(100);unclassified(100);unclassified(100);unclassified(100);	0.000315597	0.000276523	7.51421e-05	9.01705e-05	2.40455e-05	1.80341e-05	2.70512e-05
Otu000192	333	Bacteria(100);Proteobacteria(100);SPOTSOCT00m83(100);unclassified(100);unclassified(100);unclassified(100);	0.000228432	0.000120227	9.61819e-05	6.6125e-05	5.7108e-05	0.000114216	9.91876e-05
Otu000193	330	Bacteria(100);Proteobacteria(100);Alphaproteobacteria(100);Sphingomonadales(100);Sphingomonadaceae(100);Sphingopyxis(100);	0.000276523	0.000108205	9.91876e-05	0.000123233	0.000105199	0.000108205	9.01705e-06
Otu000194	315	Bacteria(100);Proteobacteria(100);Gammaproteobacteria(100);unclassified(100);unclassified(100);unclassified(100);	9.01705e-05	4.50853e-05	4.50853e-05	7.21364e-05	0.000120227	0.000138261	0.000234443
Otu000195	290	Bacteria(100);Planctomycetes(100);Planctomycetacia(100);Planctomycetales(100);Planctomycetaceae(100);Planctomyces(100);	0.000492932	9.31762e-05	6.6125e-05	9.01705e-06	1.20227e-05	0	9.01705e-06
Otu000196	290	Bacteria(100);Proteobacteria(100);Betaproteobacteria(100);Rhodocyclales(100);Rhodocyclaceae(100);unclassified(84);	0.00017433	0.000102193	0.000159301	9.91876e-05	4.20796e-05	9.31762e-05	9.91876e-05
Otu000197	288	Bacteria(100);Planctomycetes(100);OM190(100);unclassified(100);unclassified(100);unclassified(100);	0.000339642	0.000117222	6.01137e-05	1.50284e-05	4.20796e-05	3.30625e-05	1.80341e-05
Otu000198	285	Bacteria(100);Chlamydiae(100);Chlamydiae(100);Chlamydiales(100);Parachlamydiaceae(100);Candidatus_Protochlamydia(100);	6.01137e-06	0.000742404	1.20227e-05	0	3.00568e-06	0	0
Otu000199	279	Bacteria(100);Chloroflexi(100);Chloroflexia(100);Chloroflexales(100);Roseiflexaceae(100);Roseiflexus(100);	7.81478e-05	0.000147279	0.000105199	7.81478e-05	9.61819e-05	5.41023e-05	0.000207392
Otu000200	279	Bacteria(100);Bacteroidetes(100);Cytophagia(100);Cytophagales(100);Cytophagaceae(100);unclassified(99);	0.000126239	0.000123233	8.11535e-05	7.51421e-05	5.7108e-05	5.10966e-05	0.000180341
Otu000201	278	Bacteria(100);Proteobacteria(100);Alphaproteobacteria(100);Rhizobiales(100);unclassified(100);unclassified(100);	0.000204386	7.81478e-05	8.71648e-05	3.60682e-05	6.6125e-05	9.31762e-05	0.000144273
Otu000202	273	Bacteria(100);Proteobacteria(100);Alphaproteobacteria(100);Rhizobiales(100);Bradyrhizobiaceae(100);Bradyrhizobium(94);	0.000177335	6.91307e-05	4.80909e-05	6.91307e-05	0.000108205	5.41023e-05	0.00015329
Otu000203	273	Bacteria(100);Chlorobi(100);Chlorobia(100);Chlorobiales(100);SJA-28(100);unclassified(100);	3.00568e-06	3.00568e-06	3.00568e-06	7.21364e-05	0.000225426	0.000210398	0.000189358
Otu000204	272	Bacteria(100);Proteobacteria(100);TA18(100);unclassified(100);unclassified(100);unclassified(100);	4.50853e-05	8.71648e-05	0.00024346	3.00568e-05	1.80341e-05	8.11535e-05	0.000234443
Otu000205	267	Bacteria(100);Proteobacteria(100);Alphaproteobacteria(100);Caulobacterales(100);Hyphomonadaceae(100);Woodsholea(100);	0.000318602	0.000201381	7.51421e-05	3.30625e-05	1.50284e-05	2.10398e-05	9.01705e-06
Otu000206	263	Bacteria(100);Planctomycetes(100);Phycisphaerae(100);Phycisphaerales(100);Phycisphaeraceae(100);SM1A02(100);	3.00568e-06	9.01705e-06	2.10398e-05	6.6125e-05	5.41023e-05	0.000102193	0.000297563
Otu000207	260	Bacteria(100);Proteobacteria(100);Alphaproteobacteria(100);Rickettsiales(100);Rickettsiales_Incertae_Sedis(100);Candidatus_Captivus(100);	6.01137e-06	0.000273517	7.81478e-05	6.01137e-06	0	6.01137e-06	0.00030658
Otu000208	260	Bacteria(100);Candidate_division_OD1(100);unclassified(100);unclassified(100);unclassified(100);unclassified(100);	0.000504955	6.01137e-06	6.01137e-06	2.40455e-05	1.80341e-05	0	0
Otu000209	254	Bacteria(100);Candidate_division_TM7(100);unclassified(100);unclassified(100);unclassified(100);unclassified(100);	0.000516978	5.41023e-05	6.01137e-06	0	0	3.00568e-06	0
Otu000210	252	Bacteria(100);Proteobacteria(100);Deltaproteobacteria(100);Myxococcales(100);Haliangiaceae(100);Haliangium(100);	0.000348659	0.000195369	3.60682e-05	0	0	6.01137e-06	0
Otu000211	251	Bacteria(100);Proteobacteria(100);Gammaproteobacteria(100);Pseudomonadales(100);Pseudomonadaceae(100);Pseudomonas(99);	0.00015329	5.7108e-05	4.80909e-05	5.41023e-05	0.000267506	3.30625e-05	0
Otu000212	246	Bacteria(100);Planctomycetes(100);Planctomycetacia(100);Planctomycetales(100);Planctomycetaceae(100);Planctomyces(100);	2.40455e-05	3.30625e-05	6.6125e-05	3.90739e-05	4.80909e-05	0.000102193	0.000360682
Otu000213	245	Bacteria(100);Proteobacteria(100);Gammaproteobacteria(100);Enterobacteriales(100);Enterobacteriaceae(100);Morganella(100);	0.000516978	1.20227e-05	0	0	0	0	0
Otu000214	241	Bacteria(100);Proteobacteria(100);Betaproteobacteria(100);Rhodocyclales(100);Rhodocyclaceae(100);Candidatus_Accumulibacter(97);	1.20227e-05	1.80341e-05	9.01705e-05	9.91876e-05	0.000156296	0.000210398	2.70512e-05
Otu000215	235	Bacteria(100);Acidobacteria(100);Acidobacteria(100);Subgroup_4(100);Unknown_Family(100);Blastocatella(100);	3.30625e-05	3.60682e-05	5.41023e-05	6.31194e-05	6.91307e-05	0.000114216	0.000270512
Otu000216	235	Bacteria(100);Bacteroidetes(100);Cytophagia(100);Cytophagales(100);Cytophagaceae(100);Runella(100);	0.000150284	6.6125e-05	5.10966e-05	6.01137e-05	5.10966e-05	8.11535e-05	0.000144273
Otu000217	229	Bacteria(100);Proteobacteria(100);Alphaproteobacteria(100);Rhodospirillales(100);Acetobacteraceae(100);unclassified(69);	9.61819e-05	3.00568e-05	3.30625e-05	4.80909e-05	5.7108e-05	7.81478e-05	0.000171324
Otu000218	227	Bacteria(100);Verrucomicrobia(100);Opitutae(100);Opitutales(100);Opitutaceae(100);Opitutus(100);	2.40455e-05	9.01705e-06	9.01705e-05	0.000198375	0.00013225	7.21364e-05	3.60682e-05
Otu000219	223	Bacteria(100);Proteobacteria(100);Betaproteobacteria(100);Burkholderiales(100);Comamonadaceae(100);unclassified(94);	9.01705e-06	1.50284e-05	0.000117222	0.00017433	0.000114216	0.000159301	0
Otu000220	220	Bacteria(100);Planctomycetes(100);unclassified(100);unclassified(100);unclassified(100);unclassified(100);	7.21364e-05	4.80909e-05	6.01137e-05	0.000141267	9.91876e-05	0.000102193	5.41023e-05
Otu000221	219	Bacteria(100);Proteobacteria(100);Betaproteobacteria(100);Rhodocyclales(100);Rhodocyclaceae(100);unclassified(100);	0.000168318	0.000141267	7.21364e-05	5.7108e-05	3.60682e-05	3.30625e-05	1.80341e-05
Otu000222	219	Bacteria(100);Proteobacteria(100);unclassified(100);unclassified(100);unclassified(100);unclassified(100);	4.80909e-05	3.60682e-05	4.80909e-05	9.01705e-05	8.71648e-05	6.31194e-05	0.000162307
Otu000223	218	Bacteria(100);Proteobacteria(100);Betaproteobacteria(100);Burkholderiales(100);Comamonadaceae(100);Alicycliphilus(95);	0.000246466	0.000102193	5.10966e-05	4.80909e-05	5.10966e-05	2.40455e-05	0
Otu000224	217	Bacteria(100);Proteobacteria(100);Alphaproteobacteria(100);unclassified(100);unclassified(100);unclassified(100);	3.00568e-06	0	6.01137e-06	1.20227e-05	3.00568e-05	0.000183347	0.000207392
Otu000225	216	Bacteria(100);Acidobacteria(100);Acidobacteria(100);Subgroup_3(100);Elev-16S-1166(100);unclassified(100);	0.000195369	0.00013225	6.31194e-05	4.50853e-05	2.10398e-05	2.10398e-05	9.01705e-06
Otu000226	215	Bacteria(100);Verrucomicrobia(100);OPB35_soil_group(100);unclassified(100);unclassified(100);unclassified(100);	5.10966e-05	0.000126239	0.000117222	3.30625e-05	4.50853e-05	6.91307e-05	9.01705e-05
Otu000227	214	Bacteria(100);Bacteroidetes(100);Flavobacteriia(100);Flavobacteriales(100);NS9_marine_group(100);unclassified(100);	0.000141267	0.000126239	0.00011121	3.00568e-05	6.01137e-06	1.20227e-05	9.91876e-05
Otu000228	213	Bacteria(100);Bacteroidetes(100);Flavobacteriia(100);Flavobacteriales(100);Flavobacteriaceae(100);Flavobacterium(100);	3.00568e-06	6.01137e-06	3.90739e-05	9.91876e-05	0.000216409	9.01705e-05	7.21364e-05
Otu000229	210	Bacteria(100);Proteobacteria(100);Alphaproteobacteria(100);Rickettsiales(100);SM2D12(100);unclassified(100);	4.20796e-05	9.01705e-06	6.01137e-06	4.20796e-05	5.10966e-05	0.000144273	0.000180341
Otu000230	207	Bacteria(100);Proteobacteria(100);Betaproteobacteria(100);Rhodocyclales(100);Rhodocyclaceae(100);Azovibrio(100);	0.000135256	6.91307e-05	0.000105199	5.10966e-05	6.6125e-05	5.41023e-05	5.41023e-05
Otu000231	206	Bacteria(100);Proteobacteria(100);Alphaproteobacteria(100);Rhizobiales(100);Rhizobiales_Incertae_Sedis(100);Nordella(100);	0.000216409	6.31194e-05	4.80909e-05	3.00568e-05	5.7108e-05	4.50853e-05	3.60682e-05
Otu000232	204	Bacteria(100);Actinobacteria(100);Actinobacteria(100);Micrococcales(100);Intrasporangiaceae(100);Tetrasphaera(100);	0.000432818	1.50284e-05	6.01137e-06	0	0	0	0
Otu000233	203	Bacteria(100);Proteobacteria(100);Betaproteobacteria(100);Burkholderiales(100);Comamonadaceae(100);Paucibacter(69);	0.00013225	0.000192364	6.01137e-05	6.6125e-05	3.60682e-05	2.10398e-05	9.01705e-06
Otu000234	201	Bacteria(100);Proteobacteria(100);Deltaproteobacteria(100);Bdellovibrionales(100);Bdellovibrionaceae(100);Bdellovibrio(100);	0	1.80341e-05	0.000354671	2.40455e-05	0	4.80909e-05	0.000117222
Otu000235	199	Bacteria(100);Planctomycetes(100);Phycisphaerae(100);Phycisphaerales(100);Phycisphaeraceae(100);SM1A02(100);	0	0	6.01137e-06	1.50284e-05	6.01137e-06	0.00017433	0.000252477
Otu000236	195	Bacteria(100);Proteobacteria(100);Gammaproteobacteria(100);Xanthomonadales(100);Xanthomonadaceae(100);Dokdonella(100);	0.000282534	0.000114216	3.60682e-05	1.80341e-05	6.01137e-06	3.00568e-06	0
Otu000237	195	Bacteria(100);Acidobacteria(100);Acidobacteria(100);Subgroup_3(100);SJA-149(100);unclassified(100);	3.60682e-05	1.80341e-05	2.40455e-05	7.81478e-05	4.50853e-05	6.31194e-05	0.000279529
Otu000238	194	Bacteria(100);Proteobacteria(100);Betaproteobacteria(100);Rhodocyclales(100);Rhodocyclaceae(100);12up(100);	9.91876e-05	1.20227e-05	3.00568e-05	5.41023e-05	9.91876e-05	0.000117222	6.31194e-05
Otu000239	193	Bacteria(100);Proteobacteria(100);Betaproteobacteria(100);Burkholderiales(100);Comamonadaceae(100);Piscinibacter(61);	0.000252477	5.41023e-05	5.41023e-05	5.41023e-05	2.70512e-05	1.80341e-05	3.60682e-05
Otu000240	187	Bacteria(100);TM6(100);unclassified(100);unclassified(100);unclassified(100);unclassified(100);	0	0.000489926	3.00568e-06	0	0	0	0
Otu000241	186	Bacteria(100);Gemmatimonadetes(100);Gemmatimonadetes(100);Gemmatimonadales(100);Gemmatimonadaceae(100);unclassified(100);	0.000258489	3.30625e-05	6.01137e-06	1.20227e-05	3.00568e-06	1.80341e-05	3.60682e-05
Otu000242	185	Bacteria(100);Proteobacteria(100);Betaproteobacteria(100);Burkholderiales(100);Comamonadaceae(100);unclassified(87);	5.10966e-05	5.10966e-05	8.71648e-05	6.01137e-05	9.61819e-05	6.6125e-05	7.21364e-05
Otu000243	183	Bacteria(100);Verrucomicrobia(100);Verrucomicrobiae(100);Verrucomicrobiales(100);Verrucomicrobiaceae(100);unclassified(97);	0.000246466	7.51421e-05	5.7108e-05	1.80341e-05	9.01705e-06	0	0
Otu000244	183	Bacteria(100);Bacteroidetes(100);Sphingobacteriia(100);Sphingobacteriales(100);NS11-12_marine_group(100);unclassified(100);	0.000198375	1.80341e-05	9.61819e-05	3.90739e-05	2.10398e-05	0	3.60682e-05
Otu000245	180	Bacteria(100);Actinobacteria(100);Actinobacteria(100);Micrococcales(100);Microbacteriaceae(100);Leucobacter(100);	0.000378716	3.00568e-05	3.00568e-06	6.01137e-06	3.00568e-06	0	0
Otu000246	180	Bacteria(100);Acidobacteria(100);Acidobacteria(100);Subgroup_4(100);Unknown_Family(100);Blastocatella(100);	0.000150284	0.000117222	5.41023e-05	2.10398e-05	9.01705e-06	3.60682e-05	9.01705e-05
Otu000247	179	Bacteria(100);Planctomycetes(100);Phycisphaerae(100);Phycisphaerales(100);Phycisphaeraceae(100);SM1A02(100);	5.10966e-05	8.11535e-05	5.41023e-05	0.000129244	6.01137e-05	4.50853e-05	4.50853e-05
Otu000248	176	Bacteria(100);Proteobacteria(100);Betaproteobacteria(100);Burkholderiales(100);Oxalobacteraceae(100);Undibacterium(99);	0.000369699	5.41023e-05	0	0	0	0	0
Otu000249	176	Bacteria(100);Proteobacteria(100);Alphaproteobacteria(100);Rickettsiales(100);SM2D12(100);unclassified(100);	0	8.71648e-05	0.00032762	1.80341e-05	0	9.01705e-06	0
Otu000250	175	Bacteria(100);Proteobacteria(100);Gammaproteobacteria(100);unclassified(100);unclassified(100);unclassified(100);	4.50853e-05	0.000117222	3.60682e-05	6.01137e-05	2.40455e-05	5.7108e-05	0
Otu000251	174	Bacteria(100);Verrucomicrobia(100);OPB35_soil_group(100);unclassified(100);unclassified(100);unclassified(100);	0.000231438	4.50853e-05	6.01137e-05	4.80909e-05	0	6.01137e-06	1.80341e-05
Otu000252	173	Bacteria(100);unclassified(100);unclassified(100);unclassified(100);unclassified(100);unclassified(100);	0.000426807	1.20227e-05	0	0	0	0	0
Otu000253	170	Bacteria(100);Verrucomicrobia(100);OPB35_soil_group(100);unclassified(100);unclassified(100);unclassified(100);	6.01137e-06	2.70512e-05	3.90739e-05	7.81478e-05	6.01137e-05	9.01705e-05	9.91876e-05
Otu000254	170	Bacteria(100);Acidobacteria(100);Acidobacteria(100);Subgroup_3(100);Unknown_Family(100);Bryobacter(100);	0.000141267	9.01705e-05	7.51421e-05	4.50853e-05	1.80341e-05	3.90739e-05	1.80341e-05
Otu000255	169	Bacteria(100);Bacteroidetes(100);Cytophagia(100);Cytophagales(100);Cytophagaceae(100);Leadbetterella(100);	0.000330625	3.00568e-05	2.70512e-05	6.01137e-06	0	0	0
Otu000256	165	Bacteria(100);Planctomycetes(100);Planctomycetacia(100);Planctomycetales(100);Planctomycetaceae(100);Planctomyces(100);	2.70512e-05	2.70512e-05	5.41023e-05	5.10966e-05	8.11535e-05	0.000120227	3.60682e-05
Otu000257	163	Bacteria(100);Planctomycetes(100);Planctomycetacia(100);Planctomycetales(100);Planctomycetaceae(100);Planctomyces(100);	0	0	0	1.20227e-05	4.80909e-05	0.000189358	8.11535e-05
Otu000258	162	Bacteria(100);Gemmatimonadetes(100);Gemmatimonadetes(100);Gemmatimonadales(100);Gemmatimonadaceae(100);unclassified(100);	0.000303574	3.30625e-05	3.00568e-06	0	0	0	0
Otu000259	162	Bacteria(100);Proteobacteria(100);Betaproteobacteria(100);Rhodocyclales(100);Rhodocyclaceae(100);unclassified(96);	0.000231438	7.21364e-05	2.10398e-05	1.50284e-05	2.40455e-05	9.01705e-06	0
Otu000260	160	Bacteria(100);Chlorobi(100);Chlorobia(100);Chlorobiales(100);SJA-28(100);unclassified(100);	9.01705e-06	1.50284e-05	1.50284e-05	3.00568e-05	8.71648e-05	0.000123233	0.000126239
Otu000261	159	Bacteria(100);Planctomycetes(100);Phycisphaerae(100);Phycisphaerales(100);Phycisphaeraceae(100);SM1A02(100);	0	1.20227e-05	1.20227e-05	7.51421e-05	6.91307e-05	8.71648e-05	0.000171324
Otu000262	156	Bacteria(100);Proteobacteria(100);TA18(100);unclassified(100);unclassified(100);unclassified(100);	6.01137e-06	0	0	0	3.00568e-06	9.01705e-06	0.000342648
Otu000263	155	Bacteria(100);Bacteroidetes(100);Sphingobacteriia(100);Sphingobacteriales(100);Chitinophagaceae(100);Hydrotalea(66);	0.000291551	3.00568e-06	1.80341e-05	6.01137e-06	0	0	9.01705e-06
Otu000264	148	Bacteria(100);Proteobacteria(100);Betaproteobacteria(100);Rhodocyclales(100);Rhodocyclaceae(100);Denitratisoma(100);	0.000123233	9.31762e-05	8.71648e-05	1.20227e-05	3.60682e-05	3.00568e-05	1.80341e-05
Otu000265	148	Bacteria(100);Proteobacteria(100);Deltaproteobacteria(100);Desulfuromonadales(100);GR-WP33-58(100);unclassified(100);	0.000297563	0	0	0	0	0	0
Otu000266	147	Bacteria(100);Proteobacteria(100);Alphaproteobacteria(100);Rickettsiales(100);Rickettsiales_Incertae_Sedis(98);unclassified(96);	6.01137e-06	1.20227e-05	0.000135256	7.21364e-05	0.00013225	1.80341e-05	0
Otu000267	146	Bacteria(100);Bacteroidetes(100);Cytophagia(100);Cytophagales(100);unclassified(100);unclassified(100);	0.000216409	5.41023e-05	4.80909e-05	3.00568e-06	0	6.01137e-06	0
Otu000268	146	Bacteria(100);Proteobacteria(100);Gammaproteobacteria(100);Xanthomonadales(100);Xanthomonadaceae(100);Stenotrophomonas(100);	2.40455e-05	3.90739e-05	7.81478e-05	0.000108205	8.41591e-05	3.90739e-05	9.01705e-06
Otu000269	145	Bacteria(100);Proteobacteria(100);Alphaproteobacteria(100);Rhizobiales(100);Bradyrhizobiaceae(100);Bosea(100);	0.000291551	6.01137e-06	1.80341e-05	3.00568e-06	0	0	0
Otu000270	145	Bacteria(100);Verrucomicrobia(100);Opitutae(100);Opitutales(100);Opitutaceae(100);Opitutus(100);	0.000141267	4.80909e-05	7.51421e-05	9.01705e-06	6.01137e-06	3.00568e-06	7.21364e-05
Otu000271	142	Bacteria(100);Proteobacteria(100);Betaproteobacteria(100);Rhodocyclales(100);Rhodocyclaceae(100);Dechloromonas(96);	5.10966e-05	3.00568e-05	0.000105199	4.20796e-05	2.40455e-05	1.80341e-05	4.50853e-05
Otu000272	142	Bacteria(100);Proteobacteria(100);Alphaproteobacteria(100);Rhizobiales(100);Phyllobacteriaceae(98);unclassified(98);	0.000120227	9.01705e-06	3.90739e-05	3.00568e-05	3.30625e-05	6.01137e-05	4.50853e-05
Otu000273	139	Bacteria(100);Bacteroidetes(100);Sphingobacteriia(100);Sphingobacteriales(100);Sphingobacteriaceae(100);Pedobacter(98);	0.000282534	2.40455e-05	9.01705e-06	0	0	6.01137e-06	0
Otu000274	135	Bacteria(100);Bacteroidetes(100);Sphingobacteriia(100);Sphingobacteriales(100);Saprospiraceae(100);unclassified(100);	8.71648e-05	9.91876e-05	4.80909e-05	3.00568e-05	9.01705e-06	2.10398e-05	9.01705e-06
Otu000275	132	Bacteria(100);Proteobacteria(100);Gammaproteobacteria(100);Legionellales(100);Legionellaceae(100);Legionella(100);	0.000294557	0	0	0	0	0	0
Otu000276	132	Bacteria(100);Chloroflexi(100);TK10(100);unclassified(100);unclassified(100);unclassified(100);	0.000288546	3.60682e-05	0	0	0	0	0
Otu000277	132	Bacteria(100);Proteobacteria(100);Alphaproteobacteria(100);Rhodobacterales(100);Rhodobacteraceae(100);Rubellimicrobium(96);	7.81478e-05	4.80909e-05	4.50853e-05	4.50853e-05	3.90739e-05	3.30625e-05	2.70512e-05
Otu000278	131	Bacteria(100);Planctomycetes(100);Planctomycetacia(100);Planctomycetales(100);Planctomycetaceae(100);Planctomyces(100);	2.10398e-05	6.01137e-06	3.90739e-05	3.30625e-05	3.30625e-05	9.31762e-05	7.21364e-05
Otu000279	128	Bacteria(100);Planctomycetes(100);Planctomycetacia(100);Planctomycetales(100);Planctomycetaceae(100);Planctomyces(100);	8.11535e-05	4.50853e-05	6.91307e-05	3.60682e-05	1.80341e-05	4.20796e-05	9.01705e-06
Otu000280	128	Bacteria(100);Proteobacteria(100);Betaproteobacteria(100);Rhodocyclales(100);Rhodocyclaceae(100);Candidatus_Accumulibacter(94);	1.20227e-05	1.80341e-05	4.50853e-05	9.01705e-05	9.31762e-05	7.51421e-05	1.80341e-05
Otu000281	128	Bacteria(100);Proteobacteria(100);Alphaproteobacteria(100);Rhodospirillales(100);Acetobacteraceae(100);Roseomonas(100);	0.000240455	2.70512e-05	2.10398e-05	9.01705e-06	0	3.00568e-06	1.80341e-05
Otu000282	128	Bacteria(100);Proteobacteria(100);Deltaproteobacteria(100);Bdellovibrionales(100);Bdellovibrionaceae(100);Bdellovibrio(100);	2.10398e-05	3.60682e-05	0.000117222	4.80909e-05	2.40455e-05	4.80909e-05	3.60682e-05
Otu000283	127	Bacteria(100);Bacteroidetes(100);Sphingobacteriia(100);Sphingobacteriales(100);Chitinophagaceae(100);Lacibacter(100);	0.000162307	4.20796e-05	3.90739e-05	1.80341e-05	1.20227e-05	1.20227e-05	1.80341e-05
Otu000284	124	Bacteria(100);Bacteroidetes(100);Sphingobacteriia(100);Sphingobacteriales(100);Saprospiraceae(100);unclassified(100);	0.000195369	3.00568e-05	0	9.01705e-06	6.01137e-06	3.00568e-06	2.70512e-05
Otu000285	122	Bacteria(100);Planctomycetes(100);OM190(100);unclassified(100);unclassified(100);unclassified(100);	0.000141267	6.6125e-05	2.40455e-05	1.50284e-05	9.01705e-06	1.50284e-05	3.60682e-05
Otu000286	120	Bacteria(100);Bacteroidetes(100);unclassified(100);unclassified(100);unclassified(100);unclassified(100);	0.000120227	6.01137e-06	3.30625e-05	8.71648e-05	2.70512e-05	9.01705e-06	0
Otu000287	117	Bacteria(100);Proteobacteria(100);Alphaproteobacteria(100);Rhizobiales(100);unclassified(100);unclassified(100);	5.41023e-05	2.70512e-05	3.00568e-05	2.40455e-05	3.60682e-05	6.6125e-05	4.50853e-05
Otu000288	116	Bacteria(100);Proteobacteria(100);Alphaproteobacteria(100);Rickettsiales(100);SM2D12(100);unclassified(100);	0.00017433	1.80341e-05	0	8.41591e-05	3.30625e-05	0	0
Otu000289	115	Bacteria(100);Proteobacteria(100);Alphaproteobacteria(100);Rhodospirillales(100);unclassified(100);unclassified(100);	0.000129244	3.60682e-05	3.00568e-05	1.50284e-05	2.40455e-05	6.01137e-06	9.01705e-06
Otu000290	114	Bacteria(100);Proteobacteria(100);Alphaproteobacteria(100);Caulobacterales(100);Hyphomonadaceae(100);Hirschia(100);	0.000114216	3.90739e-05	3.60682e-05	3.00568e-05	3.00568e-05	2.40455e-05	1.80341e-05
Otu000291	114	Bacteria(100);Proteobacteria(100);Alphaproteobacteria(100);Caulobacterales(100);Caulobacteraceae(100);Phenylobacterium(100);	8.41591e-05	9.01705e-06	3.90739e-05	3.60682e-05	2.70512e-05	1.20227e-05	6.31194e-05
Otu000292	113	Bacteria(100);Proteobacteria(100);Alphaproteobacteria(100);Rhizobiales(100);Hyphomicrobiaceae(100);Pedomicrobium(100);	0.000138261	1.50284e-05	2.40455e-05	2.10398e-05	1.50284e-05	3.90739e-05	1.80341e-05
Otu000293	112	Bacteria(100);Actinobacteria(100);Actinobacteria(100);Micrococcales(100);Intrasporangiaceae(100);Tetrasphaera(93);	0.000180341	2.70512e-05	1.50284e-05	1.20227e-05	0	6.01137e-06	0
Otu000294	111	Bacteria(100);Chloroflexi(100);Anaerolineae(100);Anaerolineales(100);Anaerolineaceae(100);unclassified(100);	0.000135256	6.6125e-05	4.20796e-05	9.01705e-06	1.20227e-05	6.01137e-06	9.01705e-06
Otu000295	111	Bacteria(100);Proteobacteria(100);Betaproteobacteria(100);B1-7BS(100);unclassified(100);unclassified(100);	0.000120227	7.51421e-05	1.50284e-05	9.01705e-06	1.20227e-05	1.20227e-05	3.60682e-05
Otu000296	110	Bacteria(100);Gemmatimonadetes(100);Gemmatimonadetes(100);Gemmatimonadales(100);Gemmatimonadaceae(100);Gemmatimonas(100);	0.000207392	4.20796e-05	0	0	0	0	0
Otu000297	108	Bacteria(100);Proteobacteria(100);Gammaproteobacteria(100);NKB5(100);unclassified(100);unclassified(100);	0.000204386	3.00568e-06	3.00568e-06	1.80341e-05	9.01705e-06	3.00568e-06	0
Otu000298	108	Bacteria(100);Bacteroidetes(100);Bacteroidia(100);Bacteroidales(100);Porphyromonadaceae(100);Paludibacter(100);	0.000222421	1.80341e-05	0	0	0	0	0
Otu000299	108	Bacteria(100);Proteobacteria(100);Deltaproteobacteria(100);Bdellovibrionales(100);Bdellovibrionaceae(100);Bdellovibrio(100);	9.01705e-06	0.00017433	4.80909e-05	6.01137e-06	3.00568e-06	0	0
Otu000300	106	Bacteria(100);Actinobacteria(100);Actinobacteria(100);PeM15(100);unclassified(100);unclassified(100);	5.41023e-05	2.40455e-05	2.70512e-05	2.40455e-05	4.20796e-05	3.30625e-05	2.70512e-05
Otu000301	106	Bacteria(100);Proteobacteria(100);Alphaproteobacteria(100);Sphingomonadales(100);Sphingomonadaceae(100);Sphingosinicella(100);	0.000210398	3.30625e-05	9.01705e-06	0	3.00568e-06	0	0
Otu000302	106	Bacteria(100);Acidobacteria(100);Acidobacteria(100);Subgroup_3(100);unclassified(82);unclassified(82);	5.7108e-05	2.70512e-05	6.01137e-05	2.10398e-05	9.01705e-06	3.30625e-05	2.70512e-05
Otu000303	106	Bacteria(100);Bacteroidetes(100);Sphingobacteriia(100);Sphingobacteriales(100);NS11-12_marine_group(100);unclassified(100);	0.000222421	0	3.00568e-06	9.01705e-06	0	0	0
Otu000304	106	Bacteria(100);Chlamydiae(100);Chlamydiae(100);Chlamydiales(100);unclassified(100);unclassified(100);	6.01137e-06	0.000198375	3.00568e-06	0	0	5.41023e-05	0
Otu000305	106	Bacteria(100);Proteobacteria(100);Gammaproteobacteria(100);Xanthomonadales(100);Xanthomonadales_Incertae_Sedis(100);Steroidobacter(100);	0.000207392	2.70512e-05	0	0	0	0	0
Otu000306	104	Bacteria(100);Proteobacteria(100);Gammaproteobacteria(100);Acidithiobacillales(100);KCM-B-112(100);unclassified(100);	0.000114216	2.70512e-05	4.80909e-05	3.90739e-05	2.40455e-05	3.00568e-06	0
Otu000307	103	Bacteria(100);Candidate_division_TM7(100);unclassified(100);unclassified(100);unclassified(100);unclassified(100);	0.000225426	2.10398e-05	0	9.01705e-06	0	0	0
Otu000308	102	Bacteria(100);Proteobacteria(100);Betaproteobacteria(100);Burkholderiales(100);Comamonadaceae(100);Alicycliphilus(100);	1.80341e-05	3.00568e-05	9.01705e-05	5.10966e-05	3.00568e-05	3.60682e-05	0
Otu000309	101	Bacteria(100);Proteobacteria(100);Gammaproteobacteria(100);Chromatiales(100);Chromatiaceae(100);Rheinheimera(100);	0.000225426	6.01137e-06	0	0	0	0	0
Otu000310	99	Bacteria(100);Proteobacteria(100);Betaproteobacteria(100);unclassified(100);unclassified(100);unclassified(100);	3.00568e-06	9.31762e-05	0.00011121	2.10398e-05	2.70512e-05	3.00568e-06	0
Otu000311	99	Bacteria(100);Armatimonadetes(100);unclassified(100);unclassified(100);unclassified(100);unclassified(100);	0	7.81478e-05	6.91307e-05	6.31194e-05	3.00568e-05	9.01705e-06	9.01705e-06
Otu000312	99	Bacteria(100);Chloroflexi(100);Caldilineae(100);Caldilineales(100);Caldilineaceae(100);unclassified(100);	4.20796e-05	2.40455e-05	1.80341e-05	2.40455e-05	4.20796e-05	3.60682e-05	5.41023e-05
Otu000313	98	Bacteria(100);Proteobacteria(100);Gammaproteobacteria(100);Xanthomonadales(100);Xanthomonadaceae(100);Thermomonas(100);	3.00568e-05	4.80909e-05	4.80909e-05	3.00568e-05	3.90739e-05	2.70512e-05	1.80341e-05
Otu000314	98	Bacteria(100);Proteobacteria(100);Betaproteobacteria(100);Burkholderiales(100);Comamonadaceae(100);Acidovorax(98);	5.41023e-05	7.51421e-05	4.50853e-05	3.00568e-05	3.60682e-05	1.20227e-05	0
Otu000315	97	Bacteria(100);Proteobacteria(100);Alphaproteobacteria(100);Rhodobacterales(100);Rhodobacteraceae(100);Pannonibacter(98);	0.000201381	9.01705e-06	0	1.20227e-05	0	0	0
Otu000316	96	Bacteria(100);Bacteroidetes(100);Sphingobacteriia(100);Sphingobacteriales(100);Saprospiraceae(100);Haliscomenobacter(100);	3.90739e-05	1.20227e-05	2.70512e-05	2.10398e-05	4.50853e-05	3.60682e-05	3.60682e-05
Otu000317	96	Bacteria(100);Proteobacteria(100);Alphaproteobacteria(100);Rhizobiales(100);Hyphomicrobiaceae(100);Hyphomicrobium(100);	3.60682e-05	3.60682e-05	1.20227e-05	3.90739e-05	3.90739e-05	3.90739e-05	9.01705e-06
Otu000318	95	Bacteria(100);Bacteroidetes(100);Flavobacteriia(100);Flavobacteriales(100);Flavobacteriaceae(100);unclassified(100);	0.000171324	3.30625e-05	1.20227e-05	1.20227e-05	0	0	0
Otu000319	95	Bacteria(100);Proteobacteria(100);Alphaproteobacteria(100);Rhizobiales(100);Hyphomicrobiaceae(100);Hyphomicrobium(98);	5.7108e-05	2.70512e-05	1.80341e-05	2.10398e-05	4.50853e-05	4.20796e-05	9.01705e-06
Otu000320	94	Bacteria(100);Proteobacteria(100);Deltaproteobacteria(100);Bdellovibrionales(100);Bacteriovoracaceae(100);Peredibacter(100);	0.000141267	0	2.40455e-05	1.80341e-05	0	0	0
Otu000321	91	Bacteria(100);Proteobacteria(100);Alphaproteobacteria(100);Rhizobiales(100);Phyllobacteriaceae(96);unclassified(62);	2.70512e-05	1.50284e-05	3.30625e-05	1.80341e-05	4.20796e-05	4.20796e-05	3.60682e-05
Otu000322	90	Bacteria(100);Proteobacteria(100);Betaproteobacteria(100);Nitrosomonadales(100);Nitrosomonadaceae(100);Nitrosomonas(100);	1.50284e-05	0	3.00568e-05	5.7108e-05	1.80341e-05	2.10398e-05	8.11535e-05
Otu000323	89	Bacteria(100);Acidobacteria(100);Acidobacteria(100);Subgroup_3(100);Unknown_Family(100);Bryobacter(100);	0.000168318	1.80341e-05	1.80341e-05	0	3.00568e-06	9.01705e-06	0
Otu000324	89	Bacteria(100);Verrucomicrobia(100);OPB35_soil_group(100);unclassified(100);unclassified(100);unclassified(100);	6.01137e-06	1.50284e-05	3.00568e-05	3.30625e-05	3.60682e-05	1.80341e-05	5.41023e-05
Otu000325	88	Bacteria(100);Cyanobacteria(100);Chloroplast(100);unclassified(100);unclassified(100);unclassified(100);	6.01137e-06	2.70512e-05	3.90739e-05	3.30625e-05	6.31194e-05	3.30625e-05	2.70512e-05
Otu000326	88	Bacteria(100);Proteobacteria(100);Gammaproteobacteria(100);unclassified(100);unclassified(100);unclassified(100);	2.40455e-05	0.00013225	3.00568e-05	1.80341e-05	1.20227e-05	9.01705e-06	9.01705e-06
Otu000327	87	Bacteria(100);Proteobacteria(100);Betaproteobacteria(100);Nitrosomonadales(100);Nitrosomonadaceae(100);Nitrosomonas(100);	0.000129244	4.80909e-05	1.20227e-05	0	0	3.00568e-06	0
Otu000328	85	Bacteria(100);Bacteroidetes(100);Cytophagia(100);Cytophagales(100);Cytophagaceae(100);Emticicia(100);	0.000201381	1.50284e-05	0	0	3.00568e-06	0	0
Otu000329	84	Bacteria(100);Proteobacteria(100);Alphaproteobacteria(100);Rhizobiales(100);Rhizobiaceae(92);Shinella(91);	0.00017433	9.01705e-06	9.01705e-06	9.01705e-06	0	0	0
Otu000330	82	Bacteria(100);Planctomycetes(100);Phycisphaerae(100);Phycisphaerales(100);Phycisphaeraceae(100);SM1A02(100);	3.90739e-05	5.10966e-05	2.70512e-05	4.80909e-05	2.40455e-05	1.50284e-05	0
Otu000331	80	Bacteria(100);Proteobacteria(100);Alphaproteobacteria(100);Rhodospirillales(100);Rhodospirillaceae(100);Defluviicoccus(100);	0.000123233	3.60682e-05	1.80341e-05	3.00568e-06	0	3.00568e-06	0
Otu000332	80	Bacteria(100);Cyanobacteria(100);Melainabacteria(100);Obscuribacterales(100);unclassified(100);unclassified(100);	0.00011121	3.60682e-05	3.00568e-05	3.00568e-06	0	0	0
Otu000333	79	Bacteria(100);Proteobacteria(100);unclassified(100);unclassified(100);unclassified(100);unclassified(100);	0	2.40455e-05	3.90739e-05	5.10966e-05	4.80909e-05	2.10398e-05	1.80341e-05
Otu000334	79	Bacteria(100);Bacteroidetes(100);Flavobacteriia(100);Flavobacteriales(100);Flavobacteriaceae(100);Chryseobacterium(100);	0.00015329	0	0	0	0	0	9.01705e-06
Otu000335	78	Bacteria(100);Chloroflexi(100);Anaerolineae(100);Anaerolineales(100);Anaerolineaceae(100);unclassified(100);	0.000168318	9.01705e-06	6.01137e-06	0	0	0	0
Otu000336	78	Bacteria(100);Proteobacteria(100);Betaproteobacteria(100);Burkholderiales(100);Comamonadaceae(100);Aquabacterium(100);	0	0	2.70512e-05	0	5.41023e-05	0.000105199	0
Otu000337	76	Bacteria(100);Proteobacteria(100);Alphaproteobacteria(100);Rhizobiales(100);F0723(100);unclassified(100);	2.10398e-05	1.80341e-05	2.10398e-05	3.60682e-05	4.20796e-05	1.20227e-05	0
Otu000338	76	Bacteria(100);Verrucomicrobia(100);Verrucomicrobiae(100);Verrucomicrobiales(100);Verrucomicrobiaceae(100);Prosthecobacter(100);	0.000156296	6.01137e-06	1.50284e-05	0	0	0	0
Otu000339	75	Bacteria(100);Proteobacteria(100);Gammaproteobacteria(100);Xanthomonadales(100);Xanthomonadaceae(100);unclassified(98);	0	0.000129244	6.31194e-05	6.01137e-06	9.01705e-06	0	0
Otu000340	75	Bacteria(100);Proteobacteria(100);Gammaproteobacteria(100);NKB5(100);unclassified(100);unclassified(100);	4.50853e-05	0	9.01705e-06	2.70512e-05	2.10398e-05	6.01137e-05	1.80341e-05
Otu000341	74	Bacteria(100);Proteobacteria(100);Betaproteobacteria(100);Rhodocyclales(100);Rhodocyclaceae(100);Propionivibrio(100);	0.000102193	4.20796e-05	9.01705e-06	6.01137e-06	2.10398e-05	3.00568e-06	0
Otu000342	74	Bacteria(100);Proteobacteria(100);Betaproteobacteria(100);Rhodocyclales(100);Rhodocyclaceae(100);Candidatus_Accumulibacter(100);	6.01137e-06	6.01137e-06	3.30625e-05	2.70512e-05	5.7108e-05	4.80909e-05	0
Otu000343	73	Bacteria(100);Bacteroidetes(100);Flavobacteriia(100);Flavobacteriales(100);Flavobacteriaceae(100);Chryseobacterium(100);	1.20227e-05	9.01705e-06	3.60682e-05	8.11535e-05	3.00568e-05	1.50284e-05	1.80341e-05
Otu000344	72	Bacteria(100);Bacteroidetes(100);Flavobacteriia(100);Flavobacteriales(100);Flavobacteriaceae(100);Chryseobacterium(99);	9.01705e-06	1.50284e-05	9.01705e-06	0.000105199	3.00568e-05	2.40455e-05	9.01705e-06
Otu000345	72	Bacteria(100);Planctomycetes(100);unclassified(100);unclassified(100);unclassified(100);unclassified(100);	0	0	0	0	9.01705e-06	1.20227e-05	0.000126239
Otu000346	72	Bacteria(100);Verrucomicrobia(100);Opitutae(100);Opitutales(100);Opitutaceae(100);Opitutus(100);	3.00568e-06	3.00568e-06	4.20796e-05	3.90739e-05	4.20796e-05	1.50284e-05	3.60682e-05
Otu000347	71	Bacteria(100);Proteobacteria(100);Alphaproteobacteria(100);unclassified(100);unclassified(100);unclassified(100);	0.000135256	0	0	0	0	0	0
Otu000348	71	Bacteria(100);Proteobacteria(100);Betaproteobacteria(100);B1-7BS(100);unclassified(100);unclassified(100);	8.41591e-05	3.90739e-05	1.20227e-05	1.20227e-05	6.01137e-06	0	0
Otu000349	71	Bacteria(100);Bacteroidetes(100);Cytophagia(100);Cytophagales(100);Cytophagaceae(100);Cytophaga(100);	9.01705e-06	0	9.01705e-06	6.01137e-05	3.60682e-05	5.41023e-05	3.60682e-05
Otu000350	69	Bacteria(100);Bacteroidetes(100);Sphingobacteriia(100);Sphingobacteriales(100);Saprospiraceae(100);unclassified(100);	4.80909e-05	6.01137e-06	1.50284e-05	6.01137e-06	1.50284e-05	1.50284e-05	6.31194e-05
Otu000351	69	Bacteria(100);Planctomycetes(100);Phycisphaerae(100);Phycisphaerales(100);Phycisphaeraceae(100);SM1A02(95);	0	6.01137e-06	6.01137e-06	2.40455e-05	3.00568e-05	4.80909e-05	2.70512e-05
Otu000352	68	Bacteria(100);Candidate_division_BRC1(100);unclassified(100);unclassified(100);unclassified(100);unclassified(100);	2.40455e-05	0	0	0	1.50284e-05	3.00568e-06	0.000144273
Otu000353	66	Bacteria(100);Proteobacteria(100);Alphaproteobacteria(100);Rickettsiales(100);Rickettsiales_Incertae_Sedis(100);Candidatus_Captivus(100);	3.00568e-06	0	0	3.00568e-06	0	2.40455e-05	9.91876e-05
Otu000354	66	Bacteria(100);Proteobacteria(100);Gammaproteobacteria(100);Aeromonadales(100);Aeromonadaceae(100);Aeromonas(100);	0.000138261	0	0	3.00568e-06	3.00568e-06	0	0
Otu000355	65	Bacteria(100);Proteobacteria(100);Alphaproteobacteria(100);Rhizobiales(100);Hyphomicrobiaceae(100);Hyphomicrobium(100);	4.20796e-05	6.01137e-06	1.80341e-05	2.10398e-05	9.01705e-06	1.80341e-05	9.01705e-06
Otu000356	63	Bacteria(100);Bacteroidetes(100);Cytophagia(100);Cytophagales(100);Cytophagaceae(100);Ohtaekwangia(100);	5.41023e-05	6.6125e-05	1.20227e-05	6.01137e-06	3.00568e-06	6.01137e-06	0
Otu000357	60	Bacteria(100);Bacteroidetes(100);Sphingobacteriia(100);Sphingobacteriales(100);Chitinophagaceae(100);Flavihumibacter(100);	9.01705e-05	9.01705e-06	1.50284e-05	1.50284e-05	2.10398e-05	3.00568e-06	0
Otu000358	60	Bacteria(100);Proteobacteria(100);Deltaproteobacteria(100);Myxococcales(100);Haliangiaceae(100);Haliangium(100);	9.61819e-05	2.10398e-05	3.00568e-06	3.00568e-06	3.00568e-06	0	0
Otu000359	60	Bacteria(100);Proteobacteria(100);Betaproteobacteria(100);Burkholderiales(100);Comamonadaceae(100);unclassified(92);	3.60682e-05	6.91307e-05	1.80341e-05	6.01137e-06	0	0	4.50853e-05
Otu000360	60	Bacteria(100);Proteobacteria(100);Betaproteobacteria(100);Rhodocyclales(100);Rhodocyclaceae(100);Candidatus_Accumulibacter(69);	1.20227e-05	1.80341e-05	1.80341e-05	2.70512e-05	4.20796e-05	1.20227e-05	9.01705e-06
Otu000361	59	Bacteria(100);Proteobacteria(100);Betaproteobacteria(100);Burkholderiales(100);Comamonadaceae(100);Hydrogenophaga(94);	0.000114216	1.20227e-05	3.00568e-06	0	1.80341e-05	0	0
Otu000362	57	Bacteria(100);Proteobacteria(100);Alphaproteobacteria(100);Rickettsiales(100);Rickettsiaceae(100);Rickettsia(100);	0	3.00568e-06	8.11535e-05	3.60682e-05	3.30625e-05	0	0
Otu000363	57	Bacteria(100);Proteobacteria(100);Alphaproteobacteria(100);unclassified(100);unclassified(100);unclassified(100);	0.00013225	0	0	0	0	0	0
Otu000364	57	Bacteria(100);Acidobacteria(100);Acidobacteria(100);Subgroup_6(100);unclassified(100);unclassified(100);	5.41023e-05	6.01137e-06	3.00568e-06	3.00568e-06	0	6.01137e-06	6.31194e-05
Otu000365	57	Bacteria(100);unclassified(100);unclassified(100);unclassified(100);unclassified(100);unclassified(100);	7.81478e-05	3.60682e-05	1.80341e-05	0	0	6.01137e-06	9.01705e-06
Otu000366	57	Bacteria(100);Proteobacteria(100);Gammaproteobacteria(100);Legionellales(100);Legionellaceae(100);Legionella(100);	9.01705e-05	2.10398e-05	6.01137e-06	0	0	0	0
Otu000367	56	Bacteria(100);Proteobacteria(100);Alphaproteobacteria(100);Sphingomonadales(100);Sphingomonadaceae(99);Sphingobium(99);	0.000114216	0	0	0	9.01705e-06	0	0
Otu000368	56	Bacteria(100);TM6(100);unclassified(100);unclassified(100);unclassified(100);unclassified(100);	0.000117222	6.01137e-06	6.01137e-06	0	0	0	0
Otu000369	56	Bacteria(100);Proteobacteria(100);Deltaproteobacteria(100);Bdellovibrionales(100);Bdellovibrionaceae(100);Bdellovibrio(100);	2.40455e-05	6.31194e-05	5.41023e-05	3.00568e-06	0	0	0
Otu000370	56	Bacteria(100);Proteobacteria(100);Alphaproteobacteria(100);Rickettsiales(100);SM2D12(97);unclassified(97);	3.00568e-05	1.20227e-05	9.01705e-06	3.30625e-05	3.00568e-06	1.50284e-05	3.60682e-05
Otu000371	55	Bacteria(100);Proteobacteria(100);Betaproteobacteria(100);Rhodocyclales(100);Rhodocyclaceae(100);unclassified(95);	9.01705e-06	0	1.20227e-05	1.20227e-05	4.20796e-05	3.60682e-05	2.70512e-05
Otu000372	55	Bacteria(100);Proteobacteria(100);Deltaproteobacteria(100);Sh765B-TzT-29(100);unclassified(100);unclassified(100);	6.91307e-05	1.50284e-05	1.80341e-05	6.01137e-06	6.01137e-06	3.00568e-06	0
Otu000373	55	Bacteria(100);Proteobacteria(100);Betaproteobacteria(100);unclassified(100);unclassified(100);unclassified(100);	0.00011121	6.01137e-06	0	0	0	0	0
Otu000374	54	Bacteria(100);Proteobacteria(100);Gammaproteobacteria(100);Xanthomonadales(100);Xanthomonadaceae(100);unclassified(100);	5.41023e-05	3.00568e-06	9.01705e-06	2.70512e-05	1.80341e-05	1.50284e-05	9.01705e-06
Otu000375	54	Bacteria(100);Proteobacteria(100);unclassified(100);unclassified(100);unclassified(100);unclassified(100);	0.000117222	9.01705e-06	0	0	0	0	0
Otu000376	54	Bacteria(100);Bacteroidetes(100);Sphingobacteriia(100);Sphingobacteriales(100);env.OPS_17(100);unclassified(100);	0.000129244	0	0	0	0	0	0
Otu000377	53	Bacteria(100);Chloroflexi(100);Caldilineae(100);Caldilineales(100);Caldilineaceae(100);unclassified(100);	0.000108205	9.01705e-06	0	0	0	0	0
Otu000378	52	Bacteria(100);Planctomycetes(100);Phycisphaerae(100);Phycisphaerales(100);Phycisphaeraceae(100);SM1A02(100);	2.40455e-05	1.50284e-05	4.20796e-05	1.50284e-05	0	2.40455e-05	0
Otu000379	51	Bacteria(100);Bacteroidetes(100);Flavobacteriia(100);Flavobacteriales(100);Flavobacteriaceae(100);Chryseobacterium(100);	3.00568e-06	2.70512e-05	5.41023e-05	1.80341e-05	9.01705e-06	2.70512e-05	0
Otu000380	51	Bacteria(100);Bacteroidetes(100);Cytophagia(100);Cytophagales(100);Cytophagaceae(100);Cytophaga(100);	0	0	6.01137e-06	5.41023e-05	6.01137e-06	3.30625e-05	4.50853e-05
Otu000381	50	Bacteria(100);Proteobacteria(100);Betaproteobacteria(100);Burkholderiales(100);Comamonadaceae(100);unclassified(100);	5.7108e-05	2.10398e-05	4.50853e-05	9.01705e-06	6.01137e-06	0	0
Otu000382	49	Bacteria(100);Proteobacteria(100);Alphaproteobacteria(100);Rickettsiales(100);unclassified(100);unclassified(100);	9.61819e-05	1.50284e-05	0	0	0	0	0
Otu000383	49	Bacteria(100);Proteobacteria(100);Alphaproteobacteria(100);Rhodospirillales(100);Rhodospirillaceae(100);Ferrovibrio(100);	8.11535e-05	3.00568e-06	2.10398e-05	1.50284e-05	0	0	0
Otu000384	48	Bacteria(100);Proteobacteria(100);Deltaproteobacteria(100);Myxococcales(100);Phaselicystidaceae(100);Phaselicystis(100);	6.31194e-05	1.80341e-05	9.01705e-06	9.01705e-06	3.00568e-06	0	9.01705e-06
Otu000385	48	Bacteria(100);Proteobacteria(100);Betaproteobacteria(100);Rhodocyclales(100);Rhodocyclaceae(100);Candidatus_Accumulibacter(100);	4.20796e-05	3.30625e-05	2.70512e-05	9.01705e-06	0	6.01137e-06	0
Otu000386	48	Bacteria(100);Proteobacteria(100);Deltaproteobacteria(100);Myxococcales(100);Phaselicystidaceae(100);Phaselicystis(100);	0	0	0	0	0	0	0.00015329
Otu000387	47	Bacteria(100);Proteobacteria(100);unclassified(100);unclassified(100);unclassified(100);unclassified(100);	0.000123233	0	0	0	0	0	0
Otu000388	47	Bacteria(100);Proteobacteria(100);Deltaproteobacteria(100);Bdellovibrionales(100);Bdellovibrionaceae(100);Bdellovibrio(100);	9.91876e-05	0	3.00568e-06	0	0	0	0
Otu000389	45	Bacteria(100);unclassified(100);unclassified(100);unclassified(100);unclassified(100);unclassified(100);	0	0	0	3.00568e-06	1.20227e-05	7.51421e-05	9.01705e-06
Otu000390	45	Bacteria(100);Gemmatimonadetes(100);Gemmatimonadetes(100);Gemmatimonadales(100);Gemmatimonadaceae(100);Gemmatimonas(100);	9.01705e-05	1.20227e-05	0	0	0	0	0
Otu000391	44	Bacteria(100);Bacteroidetes(100);Sphingobacteriia(100);Sphingobacteriales(100);WCHB1-69(100);unclassified(100);	9.91876e-05	0	0	0	0	0	0
Otu000392	44	Bacteria(100);Proteobacteria(100);Alphaproteobacteria(100);unclassified(100);unclassified(100);unclassified(100);	0	0	0	2.70512e-05	9.01705e-06	4.20796e-05	1.80341e-05
Otu000393	44	Bacteria(100);Proteobacteria(100);Alphaproteobacteria(100);unclassified(100);unclassified(100);unclassified(100);	7.51421e-05	9.01705e-06	1.20227e-05	6.01137e-06	0	6.01137e-06	0
Otu000394	44	Bacteria(100);Proteobacteria(100);Alphaproteobacteria(100);Rhodospirillales(100);I-10(100);unclassified(100);	3.00568e-05	9.01705e-06	0	1.20227e-05	6.01137e-06	9.01705e-06	3.60682e-05
Otu000395	44	Bacteria(100);Proteobacteria(100);Betaproteobacteria(100);Burkholderiales(100);Comamonadaceae(100);unclassified(100);	4.80909e-05	0	6.01137e-06	6.01137e-06	1.50284e-05	3.00568e-06	2.70512e-05
Otu000396	43	Bacteria(100);Proteobacteria(100);Gammaproteobacteria(100);Xanthomonadales(100);Xanthomonadaceae(100);Thermomonas(96);	2.10398e-05	6.01137e-06	9.01705e-06	9.01705e-06	1.80341e-05	3.30625e-05	4.50853e-05
Otu000397	43	Bacteria(100);unclassified(100);unclassified(100);unclassified(100);unclassified(100);unclassified(100);	1.20227e-05	3.00568e-06	6.91307e-05	9.01705e-06	1.20227e-05	6.01137e-06	9.01705e-06
Otu000398	43	Bacteria(100);Proteobacteria(100);Alphaproteobacteria(100);unclassified(100);unclassified(100);unclassified(100);	0	0	0	6.6125e-05	3.60682e-05	1.80341e-05	9.01705e-06
Otu000399	43	Bacteria(100);Proteobacteria(100);Deltaproteobacteria(100);Myxococcales(100);Cystobacteraceae(100);unclassified(100);	9.61819e-05	0	0	0	0	0	0
Otu000400	43	Bacteria(100);Bacteroidetes(100);Flavobacteriia(100);Flavobacteriales(100);Flavobacteriaceae(100);unclassified(100);	9.31762e-05	1.80341e-05	6.01137e-06	0	3.00568e-06	0	0
Otu000401	43	Bacteria(100);NPL-UPA2(100);unclassified(100);unclassified(100);unclassified(100);unclassified(100);	0	0	3.00568e-06	4.20796e-05	1.80341e-05	9.01705e-06	2.70512e-05
Otu000402	43	Bacteria(100);Verrucomicrobia(100);Verrucomicrobiae(100);Verrucomicrobiales(100);Verrucomicrobiaceae(100);Luteolibacter(87);	3.00568e-06	1.20227e-05	1.20227e-05	3.90739e-05	2.10398e-05	1.50284e-05	9.01705e-06
Otu000403	43	Bacteria(100);Proteobacteria(100);Deltaproteobacteria(100);Bdellovibrionales(100);Bdellovibrionaceae(100);Bdellovibrio(100);	2.40455e-05	0	0	3.00568e-06	0	3.00568e-06	8.11535e-05
Otu000404	43	Bacteria(100);Proteobacteria(100);Betaproteobacteria(100);unclassified(100);unclassified(100);unclassified(100);	7.81478e-05	1.50284e-05	0	0	0	0	0
Otu000405	43	Bacteria(100);Proteobacteria(100);Betaproteobacteria(100);Rhodocyclales(100);Rhodocyclaceae(100);Candidatus_Accumulibacter(98);	1.50284e-05	6.01137e-06	2.40455e-05	1.20227e-05	2.40455e-05	2.10398e-05	0
Otu000406	42	Bacteria(100);Proteobacteria(100);Gammaproteobacteria(100);Alteromonadales(100);Alteromonadaceae(100);Alishewanella(100);	1.50284e-05	3.00568e-06	3.60682e-05	9.01705e-06	6.01137e-06	3.60682e-05	0
Otu000407	42	Bacteria(100);Chloroflexi(100);Chloroflexia(100);Chloroflexales(100);Chloroflexaceae(100);Chloronema(100);	6.01137e-06	0	3.00568e-06	2.10398e-05	0	1.20227e-05	6.31194e-05
Otu000408	42	Bacteria(100);unclassified(100);unclassified(100);unclassified(100);unclassified(100);unclassified(100);	5.10966e-05	2.40455e-05	1.50284e-05	3.00568e-06	9.01705e-06	3.00568e-06	0
Otu000409	42	Bacteria(100);Firmicutes(100);Clostridia(100);Clostridiales(100);Family_XII(100);Acidaminobacter(100);	1.20227e-05	3.00568e-06	0	7.51421e-05	6.01137e-06	3.00568e-06	0
Otu000410	42	Bacteria(100);Proteobacteria(100);Betaproteobacteria(100);Burkholderiales(100);Comamonadaceae(100);unclassified(100);	3.90739e-05	3.30625e-05	2.40455e-05	0	0	0	0
Otu000411	42	Bacteria(100);Proteobacteria(100);Betaproteobacteria(100);TRA3-20(100);unclassified(100);unclassified(100);	6.91307e-05	9.01705e-06	1.20227e-05	0	0	0	0
Otu000412	42	Bacteria(100);Proteobacteria(100);Betaproteobacteria(100);Burkholderiales(100);Oxalobacteraceae(100);Undibacterium(100);	1.50284e-05	2.70512e-05	0	1.50284e-05	9.01705e-06	1.50284e-05	2.70512e-05
Otu000413	41	Bacteria(100);Chloroflexi(100);Caldilineae(100);Caldilineales(100);Caldilineaceae(100);unclassified(100);	2.40455e-05	6.01137e-06	1.20227e-05	2.40455e-05	1.50284e-05	2.10398e-05	0
Otu000414	41	Bacteria(100);Chloroflexi(100);Ardenticatenia(100);unclassified(100);unclassified(100);unclassified(100);	6.6125e-05	9.01705e-06	9.01705e-06	0	0	0	9.01705e-06
Otu000415	41	Bacteria(100);Chloroflexi(100);Chloroflexia(100);Chloroflexales(100);Chloroflexaceae(100);Chloronema(100);	0	0	6.01137e-06	9.01705e-06	3.00568e-06	1.20227e-05	4.50853e-05
Otu000416	40	Bacteria(100);Proteobacteria(100);Gammaproteobacteria(100);NKB5(100);unclassified(100);unclassified(100);	7.81478e-05	6.01137e-06	0	3.00568e-06	0	0	0
Otu000417	40	Bacteria(100);Chloroflexi(100);Anaerolineae(100);Anaerolineales(100);Anaerolineaceae(100);unclassified(100);	6.91307e-05	3.00568e-06	3.00568e-06	0	3.00568e-06	1.20227e-05	0
Otu000418	40	Bacteria(100);Proteobacteria(100);Alphaproteobacteria(100);Rhodobacterales(100);Rhodobacteraceae(100);Paracoccus(58);	2.70512e-05	2.40455e-05	2.70512e-05	1.20227e-05	9.01705e-06	0	9.01705e-06
Otu000419	40	Bacteria(100);Proteobacteria(100);Gammaproteobacteria(100);PYR10d3(100);unclassified(100);unclassified(100);	4.50853e-05	1.80341e-05	6.01137e-06	6.01137e-06	0	6.01137e-06	0
Otu000420	40	Bacteria(100);Proteobacteria(100);Deltaproteobacteria(100);GR-WP33-30(100);unclassified(100);unclassified(100);	4.50853e-05	1.50284e-05	3.00568e-06	9.01705e-06	6.01137e-06	6.01137e-06	9.01705e-06
Otu000421	39	Bacteria(100);Proteobacteria(100);Deltaproteobacteria(100);Myxococcales(100);mle1-27(100);unclassified(100);	0	0	0	9.01705e-06	2.40455e-05	3.90739e-05	2.70512e-05
Otu000422	39	Bacteria(100);Proteobacteria(100);Betaproteobacteria(100);Burkholderiales(100);Comamonadaceae(100);Comamonas(100);	1.80341e-05	0	6.01137e-06	6.01137e-06	3.30625e-05	2.40455e-05	0
Otu000423	38	Bacteria(100);Candidate_division_TM7(100);unclassified(100);unclassified(100);unclassified(100);unclassified(100);	8.11535e-05	3.00568e-06	0	0	0	0	0
Otu000424	38	Bacteria(100);Proteobacteria(100);TA18(100);unclassified(100);unclassified(100);unclassified(100);	0	3.00568e-06	1.20227e-05	2.10398e-05	6.01137e-06	3.00568e-06	2.70512e-05
Otu000425	38	Bacteria(100);Proteobacteria(100);Deltaproteobacteria(100);Bdellovibrionales(100);Bdellovibrionaceae(100);OM27_clade(100);	9.91876e-05	0	0	0	0	0	0
Otu000426	37	Bacteria(100);Proteobacteria(100);Betaproteobacteria(100);Rhodocyclales(100);Rhodocyclaceae(100);Candidatus_Accumulibacter(98);	3.00568e-06	3.00568e-06	1.50284e-05	2.40455e-05	2.10398e-05	3.60682e-05	0
Otu000427	37	Bacteria(100);Cyanobacteria(100);Chloroplast(100);unclassified(100);unclassified(100);unclassified(100);	3.00568e-06	6.01137e-06	9.01705e-06	3.60682e-05	2.40455e-05	1.20227e-05	1.80341e-05
Otu000428	37	Bacteria(100);Proteobacteria(100);Deltaproteobacteria(100);Bdellovibrionales(100);Bdellovibrionaceae(100);Bdellovibrio(100);	1.50284e-05	3.60682e-05	1.20227e-05	3.00568e-06	9.01705e-06	3.00568e-06	2.70512e-05
Otu000429	36	Bacteria(100);Proteobacteria(100);Betaproteobacteria(100);Rhodocyclales(100);Rhodocyclaceae(100);Candidatus_Accumulibacter(100);	1.20227e-05	1.20227e-05	1.50284e-05	1.50284e-05	1.50284e-05	1.80341e-05	9.01705e-06
Otu000430	36	Bacteria(100);Proteobacteria(100);Betaproteobacteria(100);Rhodocyclales(100);Rhodocyclaceae(100);Candidatus_Accumulibacter(100);	6.01137e-06	6.01137e-06	1.50284e-05	2.10398e-05	2.40455e-05	1.80341e-05	0
Otu000431	34	Bacteria(100);Bacteroidetes(100);Cytophagia(100);Cytophagales(100);Cytophagaceae(100);Ohtaekwangia(100);	4.20796e-05	3.00568e-05	1.20227e-05	0	0	0	0
Otu000432	34	Bacteria(100);Proteobacteria(100);Deltaproteobacteria(100);Bdellovibrionales(100);Bdellovibrionaceae(100);Bdellovibrio(100);	4.20796e-05	6.01137e-06	2.40455e-05	3.00568e-06	0	0	0
Otu000433	33	Bacteria(100);Bacteroidetes(100);Cytophagia(100);Cytophagales(100);Cytophagaceae(100);Runella(100);	0	0	0	0	0	0	4.50853e-05
Otu000434	33	Bacteria(100);Proteobacteria(100);Betaproteobacteria(100);unclassified(100);unclassified(100);unclassified(100);	1.50284e-05	1.50284e-05	9.01705e-06	1.50284e-05	9.01705e-06	3.00568e-06	2.70512e-05
Otu000435	33	Bacteria(100);Proteobacteria(100);Alphaproteobacteria(100);unclassified(100);unclassified(100);unclassified(100);	0	0	0	0	0	1.20227e-05	7.21364e-05
Otu000436	33	Bacteria(100);Chlorobi(100);Chlorobia(100);Chlorobiales(100);SJA-28(100);unclassified(100);	3.00568e-06	6.01137e-06	6.01137e-06	3.00568e-06	1.20227e-05	1.50284e-05	2.70512e-05
Otu000437	32	Bacteria(100);Bacteroidetes(100);Cytophagia(100);Cytophagales(100);unclassified(100);unclassified(100);	6.6125e-05	9.01705e-06	0	0	0	0	0
Otu000438	32	Bacteria(100);Proteobacteria(100);Deltaproteobacteria(100);Bdellovibrionales(100);Bdellovibrionaceae(100);Bdellovibrio(100);	7.21364e-05	0	3.00568e-06	0	0	0	0
Otu000439	32	Bacteria(100);Planctomycetes(100);Phycisphaerae(100);Phycisphaerales(100);Phycisphaeraceae(100);SM1A02(100);	3.00568e-06	0	0	6.01137e-06	9.01705e-06	1.50284e-05	2.70512e-05
Otu000440	32	Bacteria(100);Proteobacteria(100);Gammaproteobacteria(100);Chromatiales(100);Chromatiaceae(100);Rheinheimera(100);	9.01705e-06	7.81478e-05	0	0	0	0	0
Otu000441	31	Bacteria(100);Proteobacteria(100);Gammaproteobacteria(100);Xanthomonadales(100);Xanthomonadaceae(100);Stenotrophomonas(97);	0	0	2.10398e-05	1.80341e-05	3.00568e-06	3.30625e-05	9.01705e-06
Otu000442	31	Bacteria(100);TM6(100);unclassified(100);unclassified(100);unclassified(100);unclassified(100);	1.50284e-05	2.70512e-05	1.20227e-05	3.00568e-06	3.00568e-06	3.00568e-06	1.80341e-05
Otu000443	31	Bacteria(100);Proteobacteria(100);Alphaproteobacteria(100);Rickettsiales(100);AKIW1012(100);unclassified(100);	1.80341e-05	4.50853e-05	1.20227e-05	3.00568e-06	0	0	0
Otu000444	31	Bacteria(100);Proteobacteria(100);Betaproteobacteria(100);Burkholderiales(100);Comamonadaceae(100);Aquabacterium(100);	3.00568e-06	3.00568e-06	1.50284e-05	0	3.60682e-05	9.01705e-06	0
Otu000445	30	Bacteria(100);Proteobacteria(100);Alphaproteobacteria(100);Rhodospirillales(100);unclassified(100);unclassified(100);	3.00568e-05	2.10398e-05	1.50284e-05	0	6.01137e-06	0	0
Otu000446	30	Bacteria(100);Proteobacteria(100);Alphaproteobacteria(100);unclassified(100);unclassified(100);unclassified(100);	3.00568e-06	3.00568e-06	0	0	2.70512e-05	6.01137e-06	1.80341e-05
Otu000447	30	Bacteria(100);Chlorobi(100);Chlorobia(100);Chlorobiales(100);SJA-28(100);unclassified(100);	6.01137e-06	0	0	6.01137e-06	1.20227e-05	1.80341e-05	3.60682e-05
Otu000448	29	Bacteria(100);Bacteroidetes(100);Cytophagia(100);Cytophagales(100);unclassified(100);unclassified(100);	4.50853e-05	1.80341e-05	0	3.00568e-06	0	0	0
Otu000449	29	Bacteria(100);Verrucomicrobia(100);Verrucomicrobiae(100);Verrucomicrobiales(100);Verrucomicrobiaceae(100);Verrucomicrobium(100);	6.6125e-05	0	0	0	0	0	0
Otu000450	29	Bacteria(100);Proteobacteria(100);Gammaproteobacteria(100);Xanthomonadales(100);Xanthomonadaceae(100);unclassified(59);	1.50284e-05	1.50284e-05	1.80341e-05	3.00568e-06	1.50284e-05	0	0
Otu000451	29	Bacteria(100);Armatimonadetes(100);unclassified(100);unclassified(100);unclassified(100);unclassified(100);	0	9.01705e-06	1.50284e-05	9.01705e-06	1.20227e-05	2.10398e-05	2.70512e-05
Otu000452	28	Bacteria(100);Bacteroidetes(100);Cytophagia(100);Cytophagales(100);Cytophagaceae(100);Chryseolinea(100);	2.40455e-05	3.00568e-06	6.01137e-06	1.50284e-05	0	6.01137e-06	0
Otu000453	28	Bacteria(100);Actinobacteria(100);Acidimicrobiia(100);Acidimicrobiales(100);Iamiaceae(100);Iamia(100);	3.60682e-05	3.00568e-06	3.00568e-06	1.50284e-05	1.50284e-05	0	0
Otu000454	28	Bacteria(100);Chlamydiae(100);Chlamydiae(100);Chlamydiales(100);Parachlamydiaceae(100);unclassified(100);	6.6125e-05	0	0	0	0	0	9.01705e-06
Otu000455	28	Bacteria(100);Bacteroidetes(100);unclassified(100);unclassified(100);unclassified(100);unclassified(100);	5.41023e-05	0	0	0	3.00568e-06	0	0
Otu000456	28	Bacteria(100);Proteobacteria(100);Deltaproteobacteria(100);Bdellovibrionales(100);Bdellovibrionaceae(100);Bdellovibrio(100);	5.41023e-05	9.01705e-06	3.00568e-06	0	0	0	0
Otu000457	27	Bacteria(100);Proteobacteria(100);Gammaproteobacteria(100);Xanthomonadales(100);Xanthomonadaceae(100);Thermomonas(100);	3.60682e-05	1.20227e-05	6.01137e-06	3.00568e-06	6.01137e-06	9.01705e-06	0
Otu000458	27	Bacteria(100);Bacteroidetes(100);Sphingobacteriia(100);Sphingobacteriales(100);Chitinophagaceae(100);Sediminibacterium(100);	0	0	1.20227e-05	3.00568e-05	1.80341e-05	6.01137e-06	1.80341e-05
Otu000459	27	Bacteria(100);Acidobacteria(100);Acidobacteria(100);Subgroup_4(100);Unknown_Family(100);Blastocatella(100);	2.40455e-05	1.50284e-05	1.20227e-05	3.00568e-06	3.00568e-06	0	1.80341e-05
Otu000460	27	Bacteria(100);Proteobacteria(100);Gammaproteobacteria(100);Pseudomonadales(100);Pseudomonadaceae(100);Pseudomonas(100);	4.80909e-05	0	6.01137e-06	3.00568e-06	1.20227e-05	3.00568e-06	0
Otu000461	27	Bacteria(100);Proteobacteria(100);Alphaproteobacteria(100);unclassified(100);unclassified(100);unclassified(100);	4.20796e-05	1.50284e-05	6.01137e-06	6.01137e-06	3.00568e-06	0	0
Otu000462	27	Bacteria(100);Proteobacteria(100);Deltaproteobacteria(100);Myxococcales(100);0319-6G20(100);unclassified(100);	1.80341e-05	2.40455e-05	1.80341e-05	0	0	0	0
Otu000463	27	Bacteria(100);Proteobacteria(100);Betaproteobacteria(100);Rhodocyclales(100);Rhodocyclaceae(100);Candidatus_Accumulibacter(97);	1.20227e-05	3.00568e-06	3.00568e-06	1.80341e-05	1.50284e-05	1.50284e-05	0
Otu000464	26	Bacteria(100);unclassified(100);unclassified(100);unclassified(100);unclassified(100);unclassified(100);	0	6.01137e-06	5.10966e-05	3.00568e-06	0	3.00568e-06	0
Otu000465	26	Bacteria(100);Proteobacteria(100);unclassified(100);unclassified(100);unclassified(100);unclassified(100);	5.10966e-05	0	0	0	0	0	0
Otu000466	26	Bacteria(100);Planctomycetes(100);OM190(100);unclassified(100);unclassified(100);unclassified(100);	0	0	9.01705e-06	3.00568e-06	3.00568e-06	1.80341e-05	1.80341e-05
Otu000467	26	Bacteria(100);Proteobacteria(100);Alphaproteobacteria(100);Rhizobiales(100);Hyphomicrobiaceae(54);Rhodoplanes(54);	1.80341e-05	6.01137e-06	0	0	0	1.50284e-05	9.01705e-06
Otu000468	26	Bacteria(100);Chlamydiae(100);Chlamydiae(100);Chlamydiales(100);Parachlamydiaceae(100);unclassified(100);	6.91307e-05	0	0	0	0	0	0
Otu000469	26	Bacteria(100);Chloroflexi(100);Ardenticatenia(100);unclassified(100);unclassified(100);unclassified(100);	6.31194e-05	3.00568e-06	0	0	0	6.01137e-06	0
Otu000470	26	Bacteria(100);Proteobacteria(100);Betaproteobacteria(100);Rhodocyclales(100);Rhodocyclaceae(100);Dechloromonas(85);	0	0	3.00568e-06	1.20227e-05	1.20227e-05	1.20227e-05	2.70512e-05
Otu000471	25	Bacteria(100);Proteobacteria(100);Betaproteobacteria(100);Methylophilales(100);Methylophilaceae(100);Methylotenera(100);	2.70512e-05	1.20227e-05	9.01705e-06	9.01705e-06	6.01137e-06	3.00568e-06	0
Otu000472	25	Bacteria(100);Actinobacteria(100);Actinobacteria(100);Propionibacteriales(100);Propionibacteriaceae(100);Microlunatus(100);	5.10966e-05	0	3.00568e-06	0	0	0	0
Otu000473	25	Bacteria(100);Proteobacteria(100);Alphaproteobacteria(100);Caulobacterales(100);Hyphomonadaceae(100);Hyphomonas(100);	0	0	1.20227e-05	3.00568e-06	3.30625e-05	1.50284e-05	9.01705e-06
Otu000474	25	Bacteria(100);Proteobacteria(100);Betaproteobacteria(100);Burkholderiales(100);Burkholderiaceae(100);Limnobacter(100);	4.20796e-05	9.01705e-06	3.00568e-06	0	0	0	0
Otu000475	25	Bacteria(100);Bacteroidetes(100);Bacteroidia(100);Bacteroidales(100);Rikenellaceae(100);Blvii28_wastewater-sludge_group(100);	3.60682e-05	0	0	0	0	3.00568e-06	0
Otu000476	25	Bacteria(100);Acidobacteria(100);Holophagae(100);Holophagales(100);Holophagaceae(100);marine_group(100);	6.01137e-05	6.01137e-06	0	0	0	0	0
Otu000477	25	Bacteria(100);Verrucomicrobia(100);Spartobacteria(100);Chthoniobacterales(100);Chthoniobacteraceae(100);Chthoniobacter(100);	0	0	6.01137e-06	1.20227e-05	1.50284e-05	1.80341e-05	0
Otu000478	25	Bacteria(100);unclassified(100);unclassified(100);unclassified(100);unclassified(100);unclassified(100);	3.30625e-05	0	1.50284e-05	6.01137e-06	0	0	1.80341e-05
Otu000479	24	Bacteria(100);Proteobacteria(100);Betaproteobacteria(100);Burkholderiales(100);Comamonadaceae(100);Delftia(100);	2.10398e-05	6.01137e-06	9.01705e-06	0	6.01137e-06	0	0
Otu000480	24	Bacteria(100);Planctomycetes(100);unclassified(100);unclassified(100);unclassified(100);unclassified(100);	0	0	0	0	0	0	1.80341e-05
Otu000481	24	Bacteria(100);Chlorobi(100);Ignavibacteria(100);Ignavibacteriales(100);Ignavibacteriaceae(100);Ignavibacterium(100);	0	6.01137e-06	1.20227e-05	2.70512e-05	3.00568e-06	3.00568e-06	0
Otu000482	24	Bacteria(100);Cyanobacteria(100);unclassified(100);unclassified(100);unclassified(100);unclassified(100);	6.01137e-06	1.80341e-05	6.01137e-06	0	0	3.60682e-05	0
Otu000483	24	Bacteria(100);Proteobacteria(100);Betaproteobacteria(100);Rhodocyclales(100);Rhodocyclaceae(100);Sulfuritalea(100);	5.41023e-05	0	3.00568e-06	0	0	0	0
Otu000484	24	Bacteria(100);Proteobacteria(100);Alphaproteobacteria(100);Rhodospirillales(100);Rhodospirillaceae(100);Defluviicoccus(100);	3.00568e-06	0	3.00568e-06	3.00568e-06	3.00568e-05	9.01705e-06	9.01705e-06
Otu000485	24	Bacteria(100);Chlorobi(100);Chlorobia(100);Chlorobiales(100);SJA-28(100);unclassified(100);	0	3.00568e-06	0	9.01705e-06	2.40455e-05	2.70512e-05	0
Otu000486	24	Bacteria(100);Proteobacteria(100);Alphaproteobacteria(100);Rickettsiales(100);SM2D12(100);unclassified(100);	6.6125e-05	0	0	0	0	0	0
Otu000487	23	Bacteria(100);Cyanobacteria(100);Melainabacteria(100);Obscuribacterales(100);unclassified(100);unclassified(100);	1.80341e-05	1.20227e-05	3.00568e-06	0	0	2.10398e-05	0
Otu000488	23	Bacteria(100);Proteobacteria(100);Betaproteobacteria(100);Rhodocyclales(100);Rhodocyclaceae(100);Candidatus_Accumulibacter(96);	6.01137e-06	3.00568e-06	9.01705e-06	3.00568e-06	9.01705e-06	2.10398e-05	1.80341e-05
Otu000489	23	Bacteria(100);Bacteroidetes(100);Sphingobacteriia(100);Sphingobacteriales(100);Chitinophagaceae(100);Niabella(100);	3.00568e-05	1.20227e-05	3.00568e-06	0	0	0	0
Otu000490	23	Bacteria(100);Proteobacteria(100);Betaproteobacteria(100);Rhodocyclales(100);Rhodocyclaceae(100);Candidatus_Accumulibacter(100);	6.01137e-06	1.20227e-05	6.01137e-06	0	1.50284e-05	6.01137e-06	2.70512e-05
Otu000491	23	Bacteria(100);Proteobacteria(100);Betaproteobacteria(100);Nitrosomonadales(100);Nitrosomonadaceae(100);unclassified(100);	3.00568e-06	9.01705e-06	3.00568e-06	1.50284e-05	1.20227e-05	1.50284e-05	0
Otu000492	23	Bacteria(100);Proteobacteria(100);Deltaproteobacteria(100);Myxococcales(100);mle1-27(100);unclassified(100);	0	0	6.01137e-06	9.01705e-06	6.01137e-06	1.20227e-05	2.70512e-05
Otu000493	23	Bacteria(100);Proteobacteria(100);Deltaproteobacteria(100);Bdellovibrionales(100);Bdellovibrionaceae(100);Bdellovibrio(100);	2.40455e-05	1.20227e-05	0	1.20227e-05	3.00568e-06	0	0
Otu000494	23	Bacteria(100);Bacteroidetes(100);Sphingobacteriia(100);Sphingobacteriales(100);Chitinophagaceae(100);Sediminibacterium(74);	6.01137e-06	0	3.00568e-06	9.01705e-06	6.01137e-06	2.70512e-05	9.01705e-06
Otu000495	23	Bacteria(100);Chloroflexi(100);KD4-96(100);unclassified(100);unclassified(100);unclassified(100);	2.40455e-05	0	0	0	9.01705e-06	0	0
Otu000496	23	Bacteria(100);Proteobacteria(100);Deltaproteobacteria(100);Bdellovibrionales(100);Bdellovibrionaceae(100);Bdellovibrio(100);	4.80909e-05	0	0	0	0	0	0
Otu000497	23	Bacteria(100);Proteobacteria(100);Deltaproteobacteria(100);Myxococcales(100);mle1-27(100);unclassified(100);	0	6.01137e-06	6.01137e-06	9.01705e-06	2.10398e-05	1.80341e-05	0
Otu000498	23	Bacteria(100);Verrucomicrobia(100);Verrucomicrobiae(100);Verrucomicrobiales(100);Verrucomicrobiaceae(100);unclassified(100);	4.50853e-05	3.00568e-06	0	0	0	0	0
Otu000499	22	Bacteria(100);Bacteroidetes(100);Sphingobacteriia(100);Sphingobacteriales(100);Sphingobacteriaceae(100);Pedobacter(64);	9.01705e-06	9.01705e-06	1.50284e-05	1.80341e-05	6.01137e-06	3.00568e-06	0
Otu000500	22	Bacteria(100);Proteobacteria(100);Gammaproteobacteria(100);unclassified(100);unclassified(100);unclassified(100);	3.60682e-05	3.00568e-06	0	0	0	0	0
Otu000501	22	Bacteria(100);Chlorobi(100);Chlorobia(100);Chlorobiales(100);SJA-28(100);unclassified(100);	0	6.01137e-06	3.00568e-06	1.20227e-05	1.80341e-05	1.50284e-05	0
Otu000502	22	Bacteria(100);Proteobacteria(100);Betaproteobacteria(100);B1-7BS(100);unclassified(100);unclassified(100);	2.70512e-05	6.01137e-06	1.20227e-05	6.01137e-06	0	0	0
Otu000503	22	Bacteria(100);Proteobacteria(100);Alphaproteobacteria(100);Rhizobiales(100);A0839(100);unclassified(100);	2.40455e-05	9.01705e-06	3.00568e-06	0	9.01705e-06	3.00568e-06	0
Otu000504	22	Bacteria(100);unclassified(100);unclassified(100);unclassified(100);unclassified(100);unclassified(100);	3.90739e-05	9.01705e-06	3.00568e-06	0	0	0	0
Otu000505	22	Bacteria(100);Proteobacteria(100);Alphaproteobacteria(100);Rhizobiales(100);MNG7(100);unclassified(100);	6.01137e-06	0	9.01705e-06	9.01705e-06	0	3.00568e-06	9.01705e-06
Otu000506	21	Bacteria(100);Bacteroidetes(100);Flavobacteriia(100);Flavobacteriales(100);Flavobacteriaceae(100);Flavobacterium(100);	9.01705e-06	1.80341e-05	9.01705e-06	1.20227e-05	9.01705e-06	0	0
Otu000507	21	Bacteria(100);Bacteroidetes(100);unclassified(100);unclassified(100);unclassified(100);unclassified(100);	0	0	3.00568e-06	1.50284e-05	3.00568e-05	0	0
Otu000508	21	Bacteria(100);Proteobacteria(100);Betaproteobacteria(100);Rhodocyclales(100);Rhodocyclaceae(100);unclassified(100);	9.01705e-06	3.00568e-06	1.20227e-05	1.20227e-05	3.00568e-06	3.00568e-06	0
Otu000509	21	Bacteria(100);Proteobacteria(100);Gammaproteobacteria(100);Xanthomonadales(100);Xanthomonadaceae(100);unclassified(100);	0	1.20227e-05	9.01705e-06	3.00568e-06	2.10398e-05	9.01705e-06	0
Otu000510	20	Bacteria(100);Bacteroidetes(100);Sphingobacteriia(100);Sphingobacteriales(100);WCHB1-69(100);unclassified(100);	3.90739e-05	0	0	0	0	0	0
Otu000511	20	Bacteria(100);Bacteroidetes(100);Cytophagia(100);Cytophagales(100);Cytophagaceae(100);Dyadobacter(100);	0	0	1.50284e-05	1.80341e-05	1.50284e-05	0	0
Otu000512	20	Bacteria(100);Proteobacteria(100);Betaproteobacteria(100);Nitrosomonadales(100);Nitrosomonadaceae(100);Nitrosomonas(100);	2.70512e-05	0	3.00568e-06	6.01137e-06	0	9.01705e-06	0
Otu000513	20	Bacteria(100);Proteobacteria(100);Betaproteobacteria(100);Rhodocyclales(100);Rhodocyclaceae(100);Candidatus_Accumulibacter(100);	6.01137e-06	9.01705e-06	1.50284e-05	0	3.00568e-06	9.01705e-06	0
Otu000514	20	Bacteria(100);Proteobacteria(100);Deltaproteobacteria(100);Bdellovibrionales(100);Bdellovibrionaceae(100);Bdellovibrio(100);	9.01705e-06	9.01705e-06	1.20227e-05	9.01705e-06	0	0	0
Otu000515	20	Bacteria(100);Chlorobi(100);Ignavibacteria(100);Ignavibacteriales(100);Ignavibacteriaceae(100);Ignavibacterium(100);	0	3.00568e-06	2.40455e-05	1.50284e-05	9.01705e-06	0	0
Otu000516	20	Bacteria(100);Chloroflexi(100);Anaerolineae(100);Anaerolineales(100);Anaerolineaceae(100);unclassified(100);	6.01137e-06	3.00568e-06	0	1.80341e-05	9.01705e-06	1.20227e-05	0
Otu000517	19	Bacteria(100);Proteobacteria(100);Alphaproteobacteria(100);Rhodospirillales(100);Rhodospirillaceae(95);unclassified(95);	2.40455e-05	1.50284e-05	3.00568e-06	0	6.01137e-06	0	0
Otu000518	19	Bacteria(100);Proteobacteria(100);Deltaproteobacteria(100);Myxococcales(100);0319-6G20(100);unclassified(100);	0	0	6.01137e-06	1.80341e-05	1.20227e-05	1.20227e-05	0
Otu000519	19	Bacteria(100);Proteobacteria(100);Betaproteobacteria(100);Rhodocyclales(100);Rhodocyclaceae(100);Candidatus_Accumulibacter(95);	3.00568e-06	0	6.01137e-06	6.01137e-06	9.01705e-06	1.80341e-05	0
Otu000520	19	Bacteria(100);Proteobacteria(100);Betaproteobacteria(100);Rhodocyclales(100);Rhodocyclaceae(100);Candidatus_Accumulibacter(85);	0	3.00568e-06	6.01137e-06	9.01705e-06	1.20227e-05	9.01705e-06	0
Otu000521	19	Bacteria(100);Proteobacteria(100);Betaproteobacteria(100);unclassified(100);unclassified(100);unclassified(100);	9.01705e-06	2.10398e-05	1.50284e-05	6.01137e-06	0	0	0
Otu000522	19	Bacteria(100);Cyanobacteria(100);Chloroplast(100);unclassified(100);unclassified(100);unclassified(100);	3.00568e-06	0	6.01137e-06	6.01137e-06	6.01137e-06	6.01137e-06	2.70512e-05
Otu000523	19	Bacteria(100);Verrucomicrobia(100);OPB35_soil_group(100);unclassified(100);unclassified(100);unclassified(100);	3.90739e-05	3.00568e-06	0	0	0	0	0
Otu000524	19	Bacteria(100);Proteobacteria(100);Betaproteobacteria(100);Rhodocyclales(100);Rhodocyclaceae(100);Propionivibrio(100);	3.30625e-05	9.01705e-06	3.00568e-06	3.00568e-06	3.00568e-06	0	0
Otu000525	19	Bacteria(100);Proteobacteria(100);Alphaproteobacteria(100);Sphingomonadales(100);Erythrobacteraceae(100);Altererythrobacter(100);	3.00568e-06	1.20227e-05	9.01705e-06	6.01137e-06	6.01137e-06	0	0
Otu000526	18	Bacteria(100);Proteobacteria(100);Betaproteobacteria(100);Nitrosomonadales(100);Nitrosomonadaceae(100);Nitrosomonas(100);	3.60682e-05	0	6.01137e-06	0	0	0	0
Otu000527	18	Bacteria(100);Proteobacteria(100);Alphaproteobacteria(100);Rickettsiales(100);unclassified(100);unclassified(100);	3.30625e-05	3.00568e-06	0	0	0	0	0
Otu000528	18	Bacteria(100);Proteobacteria(100);Alphaproteobacteria(100);Rhizobiales(100);Hyphomicrobiaceae(100);Pedomicrobium(100);	0	0	6.01137e-06	9.01705e-06	1.20227e-05	6.01137e-06	1.80341e-05
Otu000529	18	Bacteria(100);Chlorobi(100);Chlorobia(100);Chlorobiales(100);SJA-28(100);unclassified(100);	0	0	9.01705e-06	3.00568e-06	3.00568e-06	9.01705e-06	9.01705e-06
Otu000530	18	Bacteria(100);Bacteroidetes(100);Sphingobacteriia(100);Sphingobacteriales(100);Chitinophagaceae(100);unclassified(100);	4.50853e-05	6.01137e-06	0	0	0	0	0
Otu000531	18	Bacteria(100);Armatimonadetes(100);unclassified(100);unclassified(100);unclassified(100);unclassified(100);	2.10398e-05	1.20227e-05	3.00568e-06	0	0	3.00568e-06	0
Otu000532	18	Bacteria(100);Bacteroidetes(100);Sphingobacteriia(100);Sphingobacteriales(100);Saprospiraceae(95);Lewinella(95);	9.01705e-06	1.50284e-05	3.00568e-06	6.01137e-06	0	0	0
Otu000533	18	Bacteria(100);Proteobacteria(100);Deltaproteobacteria(100);Bdellovibrionales(100);Bdellovibrionaceae(100);Bdellovibrio(100);	4.20796e-05	0	0	0	6.01137e-06	0	0
Otu000534	17	Bacteria(100);Bacteroidetes(100);Sphingobacteriia(100);Sphingobacteriales(100);Saprospiraceae(100);unclassified(100);	3.00568e-06	0	9.01705e-06	3.00568e-06	0	1.20227e-05	1.80341e-05
Otu000535	17	Bacteria(100);Bacteroidetes(100);Sphingobacteriia(100);Sphingobacteriales(100);Chitinophagaceae(100);Sediminibacterium(100);	0	1.80341e-05	0	0	1.20227e-05	3.00568e-06	0
Otu000536	17	Bacteria(100);Proteobacteria(100);Deltaproteobacteria(100);Myxococcales(100);Sandaracinaceae(100);unclassified(100);	2.10398e-05	6.01137e-06	0	0	6.01137e-06	0	0
Otu000537	17	Bacteria(100);Planctomycetes(100);Planctomycetacia(100);Planctomycetales(100);Planctomycetaceae(100);Pirellula(100);	1.80341e-05	9.01705e-06	3.00568e-06	0	0	0	0
Otu000538	17	Bacteria(100);Spirochaetae(100);Spirochaetes(100);Spirochaetales(100);Leptospiraceae(100);Leptospira(100);	2.10398e-05	0	0	0	2.10398e-05	0	0
Otu000539	17	Bacteria(100);Proteobacteria(100);Betaproteobacteria(100);Rhodocyclales(100);Rhodocyclaceae(100);Candidatus_Accumulibacter(100);	1.20227e-05	2.10398e-05	9.01705e-06	0	0	0	0
Otu000540	17	Bacteria(100);Bacteroidetes(100);VC2.1_Bac22(100);unclassified(100);unclassified(100);unclassified(100);	3.90739e-05	0	0	0	0	0	0
Otu000541	17	Bacteria(100);unclassified(100);unclassified(100);unclassified(100);unclassified(100);unclassified(100);	1.80341e-05	2.40455e-05	3.00568e-06	0	0	0	0
Otu000542	17	Bacteria(100);Bacteroidetes(100);Sphingobacteriia(100);Sphingobacteriales(100);Chitinophagaceae(100);Sediminibacterium(100);	3.00568e-05	0	0	6.01137e-06	0	0	9.01705e-06
Otu000543	17	Bacteria(100);Planctomycetes(100);OM190(100);unclassified(100);unclassified(100);unclassified(100);	0	0	0	0	0	0	2.70512e-05
Otu000544	17	Bacteria(100);Proteobacteria(100);Alphaproteobacteria(100);Rickettsiales(100);SM2D12(100);unclassified(100);	3.30625e-05	3.00568e-06	0	0	0	0	0
Otu000545	17	Bacteria(100);Proteobacteria(100);Betaproteobacteria(100);Rhodocyclales(100);Rhodocyclaceae(100);Candidatus_Accumulibacter(65);	6.01137e-06	3.00568e-06	0	1.50284e-05	1.20227e-05	6.01137e-06	1.80341e-05
Otu000546	17	Bacteria(100);Proteobacteria(100);Betaproteobacteria(100);Rhodocyclales(100);Rhodocyclaceae(100);unclassified(59);	3.00568e-06	3.00568e-06	3.00568e-06	1.80341e-05	3.00568e-06	6.01137e-06	0
Otu000547	17	Bacteria(100);Proteobacteria(100);Betaproteobacteria(100);Rhodocyclales(100);Rhodocyclaceae(100);unclassified(95);	9.01705e-06	1.20227e-05	1.50284e-05	6.01137e-06	0	0	0
Otu000548	17	Bacteria(100);Proteobacteria(100);Betaproteobacteria(100);Rhodocyclales(100);Rhodocyclaceae(100);unclassified(77);	3.00568e-06	3.00568e-06	6.01137e-06	1.80341e-05	6.01137e-06	6.01137e-06	0
Otu000549	17	Bacteria(100);Bacteroidetes(100);Flavobacteriia(100);Flavobacteriales(100);Flavobacteriaceae(100);Flavobacterium(100);	2.10398e-05	0	6.01137e-06	9.01705e-06	1.50284e-05	0	0
Otu000550	17	Bacteria(100);Proteobacteria(100);Betaproteobacteria(100);Rhodocyclales(100);Rhodocyclaceae(100);unclassified(77);	3.00568e-06	6.01137e-06	1.50284e-05	6.01137e-06	3.00568e-06	3.00568e-06	0
Otu000551	16	Bacteria(100);Firmicutes(100);Negativicutes(100);Selenomonadales(100);Veillonellaceae(100);unclassified(100);	3.30625e-05	0	0	0	0	0	0
Otu000552	16	Bacteria(100);Proteobacteria(100);Deltaproteobacteria(100);Myxococcales(100);mle1-27(100);unclassified(100);	1.80341e-05	3.00568e-06	6.01137e-06	6.01137e-06	0	6.01137e-06	0
Otu000553	16	Bacteria(100);Chlorobi(100);Chlorobia(100);Chlorobiales(100);SJA-28(100);unclassified(100);	0	3.00568e-06	0	3.00568e-06	9.01705e-06	1.20227e-05	0
Otu000554	16	Bacteria(100);Candidate_division_TM7(100);unclassified(100);unclassified(100);unclassified(100);unclassified(100);	3.00568e-05	0	0	0	0	0	0
Otu000555	16	Bacteria(100);Bacteroidetes(100);Flavobacteriia(100);Flavobacteriales(100);Flavobacteriaceae(100);unclassified(82);	1.80341e-05	3.00568e-06	3.00568e-06	0	9.01705e-06	0	0
Otu000556	16	Bacteria(100);Proteobacteria(100);Deltaproteobacteria(100);Bdellovibrionales(100);Bacteriovoracaceae(100);Peredibacter(100);	4.20796e-05	0	0	0	0	0	0
Otu000557	16	Bacteria(100);Proteobacteria(100);Alphaproteobacteria(100);unclassified(100);unclassified(100);unclassified(100);	3.00568e-06	6.01137e-06	1.20227e-05	3.00568e-06	0	6.01137e-06	0
Otu000558	16	Bacteria(100);Proteobacteria(100);Betaproteobacteria(100);Rhodocyclales(100);Rhodocyclaceae(100);Candidatus_Accumulibacter(63);	0	1.20227e-05	9.01705e-06	1.20227e-05	9.01705e-06	3.00568e-06	0
Otu000559	16	Bacteria(100);Proteobacteria(100);Betaproteobacteria(100);Rhodocyclales(100);Rhodocyclaceae(100);unclassified(88);	9.01705e-06	6.01137e-06	3.00568e-06	1.80341e-05	3.00568e-06	3.00568e-06	0
Otu000560	16	Bacteria(100);unclassified(100);unclassified(100);unclassified(100);unclassified(100);unclassified(100);	3.00568e-06	3.00568e-06	9.01705e-06	9.01705e-06	9.01705e-06	9.01705e-06	0
Otu000561	16	Bacteria(100);unclassified(100);unclassified(100);unclassified(100);unclassified(100);unclassified(100);	0	0	6.01137e-06	9.01705e-06	0	6.01137e-06	9.01705e-06
Otu000562	15	Bacteria(100);Proteobacteria(100);Gammaproteobacteria(100);unclassified(100);unclassified(100);unclassified(100);	0	0	0	3.00568e-06	1.50284e-05	2.10398e-05	0
Otu000563	15	Bacteria(100);Chlorobi(100);Chlorobia(100);Chlorobiales(100);SJA-28(100);unclassified(100);	0	3.00568e-06	6.01137e-06	0	6.01137e-06	1.20227e-05	0
Otu000564	15	Bacteria(100);unclassified(100);unclassified(100);unclassified(100);unclassified(100);unclassified(100);	0	3.00568e-06	0	9.01705e-06	6.01137e-06	1.20227e-05	9.01705e-06
Otu000565	15	Bacteria(100);Proteobacteria(100);Alphaproteobacteria(100);Rhizobiales(100);unclassified(100);unclassified(100);	3.60682e-05	0	3.00568e-06	0	0	0	0
Otu000566	15	Bacteria(100);Verrucomicrobia(100);Opitutae(100);Opitutales(100);Opitutaceae(100);Opitutus(100);	9.01705e-06	6.01137e-06	3.00568e-06	3.00568e-06	0	3.00568e-06	9.01705e-06
Otu000567	15	Bacteria(100);Firmicutes(100);Clostridia(100);Clostridiales(100);Christensenellaceae(100);unclassified(100);	3.90739e-05	0	3.00568e-06	0	0	0	0
Otu000568	15	Bacteria(100);Acidobacteria(100);Acidobacteria(100);Subgroup_3(100);SJA-149(100);unclassified(100);	3.00568e-05	3.00568e-06	0	0	0	0	0
Otu000569	15	Bacteria(100);Proteobacteria(100);Alphaproteobacteria(100);Rhizobiales(100);Phyllobacteriaceae(100);unclassified(100);	6.01137e-06	0	6.01137e-06	6.01137e-06	9.01705e-06	0	9.01705e-06
Otu000570	15	Bacteria(100);Proteobacteria(100);Betaproteobacteria(100);Rhodocyclales(100);Rhodocyclaceae(100);Dechloromonas(94);	0	0	0	0	1.20227e-05	1.20227e-05	9.01705e-06
Otu000571	15	Bacteria(100);TM6(100);unclassified(100);unclassified(100);unclassified(100);unclassified(100);	3.30625e-05	0	0	0	0	0	0
Otu000572	15	Bacteria(100);Proteobacteria(100);Betaproteobacteria(100);Burkholderiales(100);Comamonadaceae(100);unclassified(100);	6.01137e-06	0	1.50284e-05	1.80341e-05	0	3.00568e-06	0
Otu000573	15	Bacteria(100);Chloroflexi(100);Chloroflexia(100);Chloroflexales(100);Chloroflexaceae(100);unclassified(94);	0	0	0	3.00568e-06	3.00568e-06	9.01705e-06	9.01705e-06
Otu000574	15	Bacteria(100);Proteobacteria(100);Betaproteobacteria(100);Burkholderiales(100);Comamonadaceae(100);Inhella(54);	0	9.01705e-06	6.01137e-06	6.01137e-06	0	3.00568e-06	0
Otu000575	15	Bacteria(100);Proteobacteria(100);Betaproteobacteria(100);Rhodocyclales(100);Rhodocyclaceae(100);unclassified(80);	3.00568e-06	1.50284e-05	0	6.01137e-06	6.01137e-06	1.20227e-05	0
Otu000576	14	Bacteria(100);Proteobacteria(100);Betaproteobacteria(100);Rhodocyclales(100);Rhodocyclaceae(100);unclassified(100);	3.00568e-06	0	0	0	3.00568e-06	6.01137e-06	3.60682e-05
Otu000577	14	Bacteria(100);Chlorobi(100);Ignavibacteria(100);Ignavibacteriales(100);Ignavibacteriaceae(100);Ignavibacterium(100);	0	0	1.20227e-05	1.80341e-05	6.01137e-06	3.00568e-06	0
Otu000578	14	Bacteria(100);Proteobacteria(100);Betaproteobacteria(100);Burkholderiales(100);Comamonadaceae(100);unclassified(86);	6.01137e-06	3.00568e-06	3.00568e-06	1.50284e-05	3.00568e-06	3.00568e-06	1.80341e-05
Otu000579	14	Bacteria(100);Cyanobacteria(100);ML635J-21(100);unclassified(100);unclassified(100);unclassified(100);	9.01705e-06	1.80341e-05	9.01705e-06	0	0	0	0
Otu000580	14	Bacteria(100);NPL-UPA2(100);unclassified(100);unclassified(100);unclassified(100);unclassified(100);	0	0	0	3.00568e-06	0	9.01705e-06	0
Otu000581	14	Bacteria(100);Bacteroidetes(100);Sphingobacteriia(100);Sphingobacteriales(100);Chitinophagaceae(100);Sediminibacterium(100);	3.00568e-06	3.00568e-06	6.01137e-06	6.01137e-06	3.00568e-06	9.01705e-06	9.01705e-06
Otu000582	14	Bacteria(100);Chlamydiae(100);Chlamydiae(100);Chlamydiales(100);unclassified(100);unclassified(100);	2.10398e-05	3.00568e-06	0	3.00568e-06	0	0	0
Otu000583	14	Bacteria(100);Proteobacteria(100);Betaproteobacteria(100);Rhodocyclales(100);Rhodocyclaceae(100);unclassified(79);	9.01705e-06	6.01137e-06	2.10398e-05	0	3.00568e-06	0	0
Otu000584	14	Bacteria(100);Bacteroidetes(100);Flavobacteriia(100);Flavobacteriales(100);Flavobacteriaceae(100);unclassified(86);	9.01705e-06	6.01137e-06	0	3.00568e-06	6.01137e-06	6.01137e-06	0
Otu000585	14	Bacteria(100);Bacteroidetes(100);Sphingobacteriia(100);Sphingobacteriales(100);Chitinophagaceae(100);unclassified(100);	1.80341e-05	6.01137e-06	6.01137e-06	0	3.00568e-06	0	0
Otu000586	14	Bacteria(100);Proteobacteria(100);Betaproteobacteria(100);Rhodocyclales(100);Rhodocyclaceae(100);Candidatus_Accumulibacter(100);	0	3.00568e-06	1.50284e-05	6.01137e-06	1.50284e-05	3.00568e-06	0
Otu000587	14	Bacteria(100);Bacteroidetes(100);WCHB1-32(100);unclassified(100);unclassified(100);unclassified(100);	3.30625e-05	0	0	0	0	0	0
Otu000588	14	Bacteria(100);Proteobacteria(100);Deltaproteobacteria(100);Myxococcales(100);Cystobacteraceae(100);unclassified(100);	1.80341e-05	3.00568e-06	0	0	0	0	0
Otu000589	14	Bacteria(100);Proteobacteria(100);Betaproteobacteria(100);Rhodocyclales(100);Rhodocyclaceae(100);Candidatus_Accumulibacter(100);	0	0	9.01705e-06	6.01137e-06	6.01137e-06	1.50284e-05	0
Otu000590	14	Bacteria(100);Proteobacteria(100);Alphaproteobacteria(100);Rhodospirillales(100);I-10(100);unclassified(100);	2.10398e-05	0	9.01705e-06	0	0	6.01137e-06	9.01705e-06
Otu000591	14	Bacteria(100);Cyanobacteria(100);Cyanobacteria(100);SubsectionIII(100);FamilyI(100);unclassified(100);	0	0	0	0	1.20227e-05	1.20227e-05	9.01705e-06
Otu000592	14	Bacteria(100);Proteobacteria(100);Deltaproteobacteria(100);Desulfuromonadales(100);GR-WP33-58(79);unclassified(79);	2.40455e-05	6.01137e-06	0	0	6.01137e-06	0	0
Otu000593	14	Bacteria(100);Proteobacteria(100);Betaproteobacteria(100);Rhodocyclales(100);Rhodocyclaceae(100);Candidatus_Accumulibacter(79);	0	0	6.01137e-06	2.10398e-05	9.01705e-06	6.01137e-06	0
Otu000594	14	Bacteria(100);Proteobacteria(100);Gammaproteobacteria(100);Pseudomonadales(100);Moraxellaceae(100);Acinetobacter(100);	3.00568e-06	0	6.01137e-06	0	1.80341e-05	9.01705e-06	0
Otu000595	14	Bacteria(100);Bacteroidetes(100);Sphingobacteriia(100);Sphingobacteriales(100);env.OPS_17(100);unclassified(100);	3.00568e-05	0	0	0	0	9.01705e-06	0
Otu000596	13	Bacteria(100);Proteobacteria(100);Betaproteobacteria(100);Burkholderiales(100);Comamonadaceae(100);Rhizobacter(100);	0	0	1.50284e-05	6.01137e-06	6.01137e-06	0	0
Otu000597	13	Bacteria(100);Proteobacteria(100);Gammaproteobacteria(100);Xanthomonadales(100);Xanthomonadaceae(100);unclassified(62);	0	9.01705e-06	9.01705e-06	3.00568e-06	3.00568e-06	3.00568e-06	0
Otu000598	13	Bacteria(100);Proteobacteria(100);Gammaproteobacteria(100);Xanthomonadales(100);Xanthomonadaceae(100);Tahibacter(100);	9.01705e-06	3.00568e-06	3.00568e-06	3.00568e-06	9.01705e-06	3.00568e-06	0
Otu000599	13	Bacteria(100);Chloroflexi(100);TK10(100);unclassified(100);unclassified(100);unclassified(100);	2.70512e-05	0	0	0	0	0	0
Otu000600	13	Bacteria(100);Planctomycetes(100);Planctomycetacia(100);Planctomycetales(100);Planctomycetaceae(100);unclassified(93);	9.01705e-06	9.01705e-06	0	3.00568e-06	3.00568e-06	9.01705e-06	0
Otu000601	13	Bacteria(100);Cyanobacteria(100);Cyanobacteria(100);SubsectionIII(100);FamilyI(100);Leptolyngbya(93);	0	0	0	3.00568e-06	6.01137e-06	9.01705e-06	0
Otu000602	13	Bacteria(100);Proteobacteria(100);Betaproteobacteria(100);Rhodocyclales(100);Rhodocyclaceae(100);Candidatus_Accumulibacter(85);	0	3.00568e-06	6.01137e-06	6.01137e-06	1.20227e-05	0	0
Otu000603	13	Bacteria(100);Proteobacteria(100);Betaproteobacteria(100);Rhodocyclales(100);Rhodocyclaceae(100);Candidatus_Accumulibacter(100);	3.00568e-06	3.00568e-06	0	1.20227e-05	9.01705e-06	3.00568e-06	0
Otu000604	13	Bacteria(100);Proteobacteria(100);Betaproteobacteria(100);Rhodocyclales(100);Rhodocyclaceae(100);unclassified(100);	0	9.01705e-06	0	6.01137e-06	6.01137e-06	6.01137e-06	0
Otu000605	13	Bacteria(100);Proteobacteria(100);Alphaproteobacteria(100);Rickettsiales(100);SM2D12(100);unclassified(100);	2.40455e-05	0	3.00568e-06	0	0	0	0
Otu000606	13	Bacteria(100);Proteobacteria(100);Deltaproteobacteria(100);Myxococcales(100);unclassified(100);unclassified(100);	0	0	0	6.01137e-06	0	0	3.60682e-05
Otu000607	13	Bacteria(100);Proteobacteria(100);Gammaproteobacteria(100);Legionellales(100);Coxiellaceae(100);Coxiella(100);	0	3.00568e-06	6.01137e-06	6.01137e-06	3.00568e-06	3.00568e-06	9.01705e-06
Otu000608	13	Bacteria(100);Bacteroidetes(100);unclassified(100);unclassified(100);unclassified(100);unclassified(100);	2.40455e-05	0	0	6.01137e-06	9.01705e-06	0	0
Otu000609	13	Bacteria(100);Actinobacteria(100);Actinobacteria(100);Propionibacteriales(100);Nocardioidaceae(100);Nocardioides(100);	2.70512e-05	0	0	0	0	0	0
Otu000610	13	Bacteria(100);Acidobacteria(100);Acidobacteria(100);Subgroup_4(100);Unknown_Family(100);Blastocatella(100);	1.80341e-05	1.20227e-05	0	0	3.00568e-06	0	0
Otu000611	13	Bacteria(100);Bacteroidetes(100);Sphingobacteriia(100);Sphingobacteriales(100);Saprospiraceae(100);unclassified(100);	0	3.00568e-06	6.01137e-06	0	0	1.50284e-05	0
Otu000612	13	Bacteria(100);Candidate_division_OD1(100);unclassified(100);unclassified(100);unclassified(100);unclassified(100);	2.70512e-05	0	0	0	0	0	0
Otu000613	13	Bacteria(100);Proteobacteria(100);Alphaproteobacteria(100);unclassified(100);unclassified(100);unclassified(100);	1.20227e-05	1.50284e-05	0	0	0	0	0
Otu000614	12	Bacteria(100);Proteobacteria(100);Betaproteobacteria(100);Rhodocyclales(100);Rhodocyclaceae(100);unclassified(100);	2.10398e-05	6.01137e-06	3.00568e-06	3.00568e-06	0	0	0
Otu000615	12	Bacteria(100);Chlorobi(100);Ignavibacteria(100);Ignavibacteriales(100);Ignavibacteriaceae(100);Ignavibacterium(100);	3.00568e-06	9.01705e-06	6.01137e-06	1.20227e-05	0	0	0
Otu000616	12	Bacteria(100);Proteobacteria(100);Betaproteobacteria(100);Rhodocyclales(100);Rhodocyclaceae(100);unclassified(100);	0	0	0	3.00568e-06	9.01705e-06	6.01137e-06	9.01705e-06
Otu000617	12	Bacteria(100);Proteobacteria(100);Betaproteobacteria(100);Rhodocyclales(100);Rhodocyclaceae(100);unclassified(92);	0	0	0	3.00568e-06	2.10398e-05	6.01137e-06	0
Otu000618	12	Bacteria(100);Proteobacteria(100);Betaproteobacteria(100);Rhodocyclales(100);Rhodocyclaceae(100);Candidatus_Accumulibacter(100);	0	3.00568e-06	0	3.00568e-06	1.50284e-05	6.01137e-06	0
Otu000619	12	Bacteria(100);Proteobacteria(100);Betaproteobacteria(100);Rhodocyclales(100);Rhodocyclaceae(100);unclassified(100);	6.01137e-06	6.01137e-06	1.20227e-05	0	0	3.00568e-06	0
Otu000620	12	Bacteria(100);Acidobacteria(100);Holophagae(100);Holophagales(100);Holophagaceae(100);unclassified(100);	2.70512e-05	3.00568e-06	0	0	0	0	0
Otu000621	12	Bacteria(100);Proteobacteria(100);Alphaproteobacteria(100);DB1-14(100);unclassified(100);unclassified(100);	2.70512e-05	3.00568e-06	0	0	0	0	0
Otu000622	12	Bacteria(100);Proteobacteria(100);Alphaproteobacteria(100);Rhizobiales(100);Rhizobiales_Incertae_Sedis(100);Bauldia(100);	0	0	6.01137e-06	9.01705e-06	6.01137e-06	0	9.01705e-06
Otu000623	12	Bacteria(100);Proteobacteria(100);Betaproteobacteria(100);Rhodocyclales(100);Rhodocyclaceae(100);Candidatus_Accumulibacter(59);	0	0	3.00568e-06	6.01137e-06	1.20227e-05	1.20227e-05	0
Otu000624	12	Bacteria(100);Bacteroidetes(100);Flavobacteriia(100);Flavobacteriales(100);Flavobacteriaceae(100);Flavobacterium(100);	3.00568e-06	6.01137e-06	1.80341e-05	3.00568e-06	0	3.00568e-06	0
Otu000625	12	Bacteria(100);Proteobacteria(100);Betaproteobacteria(100);Rhodocyclales(100);Rhodocyclaceae(100);unclassified(84);	0	3.00568e-06	9.01705e-06	0	3.00568e-06	1.80341e-05	0
Otu000626	12	Bacteria(100);Proteobacteria(100);Betaproteobacteria(100);Rhodocyclales(100);Rhodocyclaceae(100);unclassified(100);	6.01137e-06	3.00568e-06	9.01705e-06	0	6.01137e-06	0	0
Otu000627	12	Bacteria(100);Proteobacteria(100);Betaproteobacteria(100);Rhodocyclales(100);Rhodocyclaceae(100);Sulfuritalea(100);	0	0	0	0	9.01705e-06	0	1.80341e-05
Otu000628	12	Bacteria(100);Proteobacteria(100);Betaproteobacteria(100);Rhodocyclales(100);Rhodocyclaceae(100);Candidatus_Accumulibacter(100);	1.80341e-05	3.00568e-06	6.01137e-06	0	0	0	0
Otu000629	12	Bacteria(100);Proteobacteria(100);Betaproteobacteria(100);Burkholderiales(100);Comamonadaceae(100);unclassified(75);	0	3.00568e-06	9.01705e-06	9.01705e-06	6.01137e-06	0	0
Otu000630	12	Bacteria(100);unclassified(100);unclassified(100);unclassified(100);unclassified(100);unclassified(100);	3.00568e-06	0	3.00568e-06	6.01137e-06	9.01705e-06	3.00568e-06	0
Otu000631	12	Bacteria(100);Bacteroidetes(100);Flavobacteriia(100);Flavobacteriales(100);Flavobacteriaceae(100);Flavobacterium(100);	6.01137e-06	9.01705e-06	0	3.00568e-06	1.50284e-05	0	0
Otu000632	12	Bacteria(100);unclassified(100);unclassified(100);unclassified(100);unclassified(100);unclassified(100);	6.01137e-06	0	6.01137e-06	6.01137e-06	0	3.00568e-06	9.01705e-06
Otu000633	12	Bacteria(100);Proteobacteria(100);Gammaproteobacteria(100);unclassified(100);unclassified(100);unclassified(100);	3.00568e-06	2.10398e-05	6.01137e-06	0	0	0	9.01705e-06
Otu000634	12	Bacteria(100);Proteobacteria(100);Gammaproteobacteria(100);Xanthomonadales(100);Xanthomonadaceae(100);Luteimonas(100);	6.01137e-06	0	6.01137e-06	0	3.00568e-06	3.00568e-06	9.01705e-06
Otu000635	12	Bacteria(100);Bacteroidetes(100);Sphingobacteriia(100);Sphingobacteriales(100);Chitinophagaceae(100);Sediminibacterium(100);	0	0	0	1.20227e-05	9.01705e-06	3.00568e-06	0
Otu000636	12	Bacteria(100);Bacteroidetes(100);Sphingobacteriia(100);Sphingobacteriales(100);Sphingobacteriaceae(100);Sphingobacterium(100);	2.40455e-05	3.00568e-06	6.01137e-06	0	3.00568e-06	0	0
Otu000637	11	Bacteria(100);Proteobacteria(100);Betaproteobacteria(100);Rhodocyclales(100);Rhodocyclaceae(100);Candidatus_Accumulibacter(100);	9.01705e-06	3.00568e-06	6.01137e-06	3.00568e-06	9.01705e-06	0	0
Otu000638	11	Bacteria(100);Proteobacteria(100);Betaproteobacteria(100);Rhodocyclales(100);Rhodocyclaceae(100);unclassified(73);	3.00568e-06	9.01705e-06	6.01137e-06	3.00568e-06	9.01705e-06	3.00568e-06	0
Otu000639	11	Bacteria(100);Chlorobi(100);Chlorobia(100);Chlorobiales(100);SJA-28(100);unclassified(100);	0	0	0	0	0	1.20227e-05	9.01705e-06
Otu000640	11	Bacteria(100);Verrucomicrobia(100);Verrucomicrobiae(100);Verrucomicrobiales(100);Verrucomicrobiaceae(100);Brevifollis(100);	2.10398e-05	0	0	0	0	0	0
Otu000641	11	Bacteria(100);unclassified(100);unclassified(100);unclassified(100);unclassified(100);unclassified(100);	6.01137e-06	0	9.01705e-06	3.00568e-06	6.01137e-06	0	0
Otu000642	11	Bacteria(100);Proteobacteria(100);Betaproteobacteria(100);Rhodocyclales(100);Rhodocyclaceae(100);unclassified(100);	6.01137e-06	6.01137e-06	1.20227e-05	0	0	0	1.80341e-05
Otu000643	11	Bacteria(100);Cyanobacteria(100);Cyanobacteria(100);SubsectionIII(100);FamilyI(100);unclassified(64);	0	0	0	6.01137e-06	6.01137e-06	9.01705e-06	0
Otu000644	11	Bacteria(100);Bacteroidetes(100);Sphingobacteriia(100);Sphingobacteriales(100);Chitinophagaceae(100);Terrimonas(100);	0	3.00568e-06	6.01137e-06	9.01705e-06	3.00568e-06	6.01137e-06	0
Otu000645	11	Bacteria(100);unclassified(100);unclassified(100);unclassified(100);unclassified(100);unclassified(100);	0	3.00568e-06	1.20227e-05	3.00568e-06	3.00568e-06	6.01137e-06	0
Otu000646	11	Bacteria(100);Cyanobacteria(100);Melainabacteria(100);Obscuribacterales(100);unclassified(100);unclassified(100);	0	0	9.01705e-06	3.00568e-06	3.00568e-06	0	9.01705e-06
Otu000647	11	Bacteria(100);Bacteroidetes(100);Sphingobacteriia(100);Sphingobacteriales(100);Chitinophagaceae(55);unclassified(55);	6.01137e-06	0	3.00568e-06	3.00568e-06	1.50284e-05	3.00568e-06	9.01705e-06
Otu000648	11	Bacteria(100);Firmicutes(100);Clostridia(100);Clostridiales(100);Family_XII(82);Acidaminobacter(82);	2.70512e-05	0	0	0	0	0	0
Otu000649	11	Bacteria(100);Firmicutes(100);Bacilli(100);Bacillales(100);Family_XII(100);Exiguobacterium(100);	0	1.50284e-05	3.00568e-06	6.01137e-06	6.01137e-06	3.00568e-06	0
Otu000650	11	Bacteria(100);Proteobacteria(100);Betaproteobacteria(100);Rhodocyclales(100);Rhodocyclaceae(100);Candidatus_Accumulibacter(100);	0	0	3.00568e-06	9.01705e-06	1.50284e-05	0	0
Otu000651	11	Bacteria(100);Proteobacteria(100);Betaproteobacteria(100);Rhodocyclales(100);Rhodocyclaceae(100);Candidatus_Accumulibacter(91);	1.20227e-05	9.01705e-06	9.01705e-06	0	0	0	0
Otu000652	11	Bacteria(100);Chloroflexi(100);Anaerolineae(100);Anaerolineales(100);Anaerolineaceae(100);unclassified(100);	1.50284e-05	6.01137e-06	9.01705e-06	0	0	0	0
Otu000653	11	Bacteria(100);Actinobacteria(100);Acidimicrobiia(100);Acidimicrobiales(100);Iamiaceae(100);Iamia(100);	2.70512e-05	0	0	0	3.00568e-06	0	0
Otu000654	11	Bacteria(100);TM6(100);unclassified(100);unclassified(100);unclassified(100);unclassified(100);	0	0	0	1.20227e-05	1.20227e-05	0	0
Otu000655	11	Bacteria(100);Bacteroidetes(100);Flavobacteriia(100);Flavobacteriales(100);Flavobacteriaceae(100);Flavobacterium(100);	9.01705e-06	1.20227e-05	3.00568e-06	3.00568e-06	3.00568e-06	0	0
Otu000656	11	Bacteria(100);Proteobacteria(100);unclassified(100);unclassified(100);unclassified(100);unclassified(100);	2.40455e-05	0	0	0	0	0	0
Otu000657	11	Bacteria(100);Proteobacteria(100);Deltaproteobacteria(100);Desulfovibrionales(100);Desulfovibrionaceae(100);Desulfovibrio(100);	1.80341e-05	0	0	0	0	0	0
Otu000658	11	Bacteria(100);Acidobacteria(100);Holophagae(100);Holophagales(100);Holophagaceae(100);unclassified(100);	1.80341e-05	6.01137e-06	0	0	0	0	0
Otu000659	11	Bacteria(100);Planctomycetes(100);Planctomycetacia(100);Planctomycetales(100);Planctomycetaceae(100);Pirellula(100);	0	0	0	9.01705e-06	9.01705e-06	3.00568e-06	1.80341e-05
Otu000660	11	Bacteria(100);Planctomycetes(100);Planctomycetacia(100);Planctomycetales(100);Planctomycetaceae(100);Planctomyces(100);	0	0	0	0	0	3.00568e-06	9.01705e-06
Otu000661	11	Bacteria(100);Proteobacteria(100);Betaproteobacteria(100);TRA3-20(100);unclassified(100);unclassified(100);	2.10398e-05	0	0	0	0	0	0
Otu000662	11	Bacteria(100);Proteobacteria(100);Gammaproteobacteria(100);unclassified(100);unclassified(100);unclassified(100);	1.20227e-05	1.80341e-05	0	0	0	0	0
Otu000663	11	Bacteria(100);Proteobacteria(100);Alphaproteobacteria(100);Rickettsiales(100);SM2D12(100);unclassified(100);	6.01137e-06	1.50284e-05	0	3.00568e-06	3.00568e-06	3.00568e-06	0
Otu000664	11	Bacteria(100);Chlorobi(100);Chlorobia(100);Chlorobiales(100);SJA-28(100);unclassified(100);	0	0	3.00568e-06	3.00568e-06	6.01137e-06	1.20227e-05	0
Otu000665	11	Bacteria(100);Proteobacteria(100);unclassified(100);unclassified(100);unclassified(100);unclassified(100);	3.00568e-06	3.00568e-06	3.00568e-06	6.01137e-06	0	0	0
Otu000666	11	Bacteria(100);Proteobacteria(100);Betaproteobacteria(100);Rhodocyclales(100);Rhodocyclaceae(100);unclassified(100);	0	6.01137e-06	9.01705e-06	0	6.01137e-06	0	0
Otu000667	11	Bacteria(100);Acidobacteria(100);Acidobacteria(100);Subgroup_3(100);SJA-149(100);unclassified(100);	9.01705e-06	1.20227e-05	0	0	0	0	0
Otu000668	11	Bacteria(100);Proteobacteria(100);Betaproteobacteria(100);Rhodocyclales(100);Rhodocyclaceae(100);unclassified(73);	0	6.01137e-06	1.20227e-05	3.00568e-06	0	0	0
Otu000669	10	Bacteria(100);Proteobacteria(100);Alphaproteobacteria(100);unclassified(100);unclassified(100);unclassified(100);	0	1.20227e-05	3.00568e-06	3.00568e-06	3.00568e-06	0	0
Otu000670	10	Bacteria(100);Bacteroidetes(100);unclassified(100);unclassified(100);unclassified(100);unclassified(100);	1.20227e-05	0	0	6.01137e-06	0	0	0
Otu000671	10	Bacteria(100);Bacteroidetes(100);Sphingobacteriia(100);Sphingobacteriales(100);Chitinophagaceae(100);unclassified(100);	3.00568e-06	3.00568e-06	3.00568e-06	3.00568e-06	3.00568e-06	3.00568e-06	0
Otu000672	10	Bacteria(100);Proteobacteria(100);Betaproteobacteria(100);Rhodocyclales(100);Rhodocyclaceae(100);unclassified(90);	0	0	0	9.01705e-06	3.00568e-06	9.01705e-06	1.80341e-05
Otu000673	10	Bacteria(100);Candidate_division_TM7(100);unclassified(100);unclassified(100);unclassified(100);unclassified(100);	1.20227e-05	0	0	3.00568e-06	3.00568e-06	0	0
Otu000674	10	Bacteria(100);Proteobacteria(100);Betaproteobacteria(100);Rhodocyclales(100);Rhodocyclaceae(100);unclassified(70);	0	0	0	0	0	9.01705e-06	9.01705e-06
Otu000675	10	Bacteria(100);Bacteroidetes(100);Flavobacteriia(100);Flavobacteriales(100);Flavobacteriaceae(100);Flavobacterium(100);	3.00568e-06	6.01137e-06	1.20227e-05	0	3.00568e-06	0	0
Otu000676	10	Bacteria(100);Proteobacteria(100);Betaproteobacteria(100);Rhodocyclales(100);Rhodocyclaceae(100);Candidatus_Accumulibacter(100);	6.01137e-06	6.01137e-06	1.20227e-05	0	0	3.00568e-06	0
Otu000677	10	Bacteria(100);Verrucomicrobia(100);Spartobacteria(100);Chthoniobacterales(100);Chthoniobacteraceae(100);Chthoniobacter(100);	0	0	0	0	6.01137e-06	0	2.70512e-05
Otu000678	10	Bacteria(100);Proteobacteria(100);Betaproteobacteria(100);Rhodocyclales(100);Rhodocyclaceae(100);unclassified(70);	0	0	0	0	6.01137e-06	1.20227e-05	1.80341e-05
Otu000679	10	Bacteria(100);Proteobacteria(100);Deltaproteobacteria(100);unclassified(100);unclassified(100);unclassified(100);	1.80341e-05	0	0	0	0	0	0
Otu000680	10	Bacteria(100);Verrucomicrobia(100);OPB35_soil_group(100);unclassified(100);unclassified(100);unclassified(100);	3.00568e-06	3.00568e-06	9.01705e-06	3.00568e-06	3.00568e-06	0	0
Otu000681	10	Bacteria(100);Proteobacteria(100);Gammaproteobacteria(100);Xanthomonadales(100);Xanthomonadaceae(100);unclassified(90);	0	0	3.00568e-06	0	3.00568e-06	3.00568e-06	2.70512e-05
Otu000682	10	Bacteria(100);Bacteroidetes(100);unclassified(100);unclassified(100);unclassified(100);unclassified(100);	0	0	6.01137e-06	2.10398e-05	0	0	0
Otu000683	10	Bacteria(100);unclassified(100);unclassified(100);unclassified(100);unclassified(100);unclassified(100);	0	0	0	6.01137e-06	3.00568e-06	1.20227e-05	0
Otu000684	10	Bacteria(100);unclassified(100);unclassified(100);unclassified(100);unclassified(100);unclassified(100);	0	0	0	3.00568e-06	1.20227e-05	6.01137e-06	0
Otu000685	10	Bacteria(100);Gemmatimonadetes(100);Gemmatimonadetes(100);Gemmatimonadales(100);Gemmatimonadaceae(100);unclassified(100);	9.01705e-06	3.00568e-06	0	0	0	3.00568e-06	0
Otu000686	10	Bacteria(100);unclassified(100);unclassified(100);unclassified(100);unclassified(100);unclassified(100);	0	3.00568e-06	0	3.00568e-06	9.01705e-06	3.00568e-06	0
Otu000687	10	Bacteria(100);Proteobacteria(100);Betaproteobacteria(100);unclassified(100);unclassified(100);unclassified(100);	0	1.20227e-05	0	3.00568e-06	6.01137e-06	3.00568e-06	0
Otu000688	10	Bacteria(100);Actinobacteria(100);Thermoleophilia(100);Gaiellales(100);unclassified(100);unclassified(100);	3.00568e-06	3.00568e-06	0	3.00568e-06	9.01705e-06	3.00568e-06	9.01705e-06
Otu000689	10	Bacteria(100);Proteobacteria(100);Betaproteobacteria(100);unclassified(100);unclassified(100);unclassified(100);	0	0	0	6.01137e-06	6.01137e-06	1.20227e-05	9.01705e-06
Otu000690	10	Bacteria(100);Proteobacteria(100);unclassified(100);unclassified(100);unclassified(100);unclassified(100);	6.01137e-06	3.00568e-06	0	0	0	3.00568e-06	0
Otu000691	10	Bacteria(100);Proteobacteria(100);Betaproteobacteria(100);Rhodocyclales(100);Rhodocyclaceae(100);Candidatus_Accumulibacter(80);	6.01137e-06	2.10398e-05	0	0	3.00568e-06	0	0
Otu000692	10	Bacteria(100);Bacteroidetes(100);Sphingobacteriia(100);Sphingobacteriales(100);Sphingobacteriaceae(100);Sphingobacterium(100);	0	1.20227e-05	0	6.01137e-06	3.00568e-06	3.00568e-06	0
Otu000693	10	Bacteria(100);Actinobacteria(100);Thermoleophilia(100);Gaiellales(100);unclassified(100);unclassified(100);	9.01705e-06	1.20227e-05	0	0	0	0	0
Otu000694	10	Bacteria(100);unclassified(100);unclassified(100);unclassified(100);unclassified(100);unclassified(100);	0	0	3.00568e-06	6.01137e-06	9.01705e-06	3.00568e-06	9.01705e-06
Otu000695	10	Bacteria(100);Verrucomicrobia(100);Spartobacteria(100);Chthoniobacterales(100);Chthoniobacteraceae(100);Chthoniobacter(100);	9.01705e-06	6.01137e-06	0	0	0	0	0
Otu000696	10	Bacteria(100);Bacteroidetes(100);Sphingobacteriia(100);Sphingobacteriales(100);Saprospiraceae(90);Lewinella(61);	0	6.01137e-06	9.01705e-06	3.00568e-06	0	0	9.01705e-06
Otu000697	9	Bacteria(100);Candidate_division_TM7(100);unclassified(100);unclassified(100);unclassified(100);unclassified(100);	1.80341e-05	0	0	0	0	0	0
Otu000698	9	Bacteria(100);Proteobacteria(100);Betaproteobacteria(100);Rhodocyclales(100);Rhodocyclaceae(100);Candidatus_Accumulibacter(78);	0	3.00568e-06	1.20227e-05	3.00568e-06	6.01137e-06	0	0
Otu000699	9	Bacteria(100);Proteobacteria(100);Betaproteobacteria(100);Rhodocyclales(100);Rhodocyclaceae(100);unclassified(100);	0	0	0	0	9.01705e-06	9.01705e-06	0
Otu000700	9	Bacteria(100);Proteobacteria(100);Betaproteobacteria(100);unclassified(100);unclassified(100);unclassified(100);	0	9.01705e-06	3.00568e-06	3.00568e-06	3.00568e-06	6.01137e-06	0
Otu000701	9	Bacteria(100);Bacteroidetes(100);Sphingobacteriia(100);Sphingobacteriales(100);unclassified(100);unclassified(100);	0	0	1.80341e-05	0	6.01137e-06	0	0
Otu000702	9	Bacteria(100);Proteobacteria(100);Betaproteobacteria(100);Rhodocyclales(100);Rhodocyclaceae(100);Ferribacterium(56);	0	9.01705e-06	6.01137e-06	0	6.01137e-06	3.00568e-06	0
Otu000703	9	Bacteria(100);Actinobacteria(100);Acidimicrobiia(100);Acidimicrobiales(100);Acidimicrobiaceae(100);Ilumatobacter(100);	1.20227e-05	6.01137e-06	0	0	0	0	0
Otu000704	9	Bacteria(100);Proteobacteria(100);Deltaproteobacteria(100);unclassified(100);unclassified(100);unclassified(100);	3.00568e-06	0	3.00568e-06	3.00568e-06	0	6.01137e-06	0
Otu000705	9	Bacteria(100);Chloroflexi(100);Thermomicrobia(100);AKYG1722(100);unclassified(100);unclassified(100);	1.80341e-05	0	0	0	0	0	0
Otu000706	9	Bacteria(100);Planctomycetes(100);Planctomycetacia(100);Planctomycetales(100);Planctomycetaceae(100);Gemmata(100);	6.01137e-06	3.00568e-06	3.00568e-06	0	3.00568e-06	0	1.80341e-05
Otu000707	9	Bacteria(100);Proteobacteria(100);Betaproteobacteria(100);unclassified(100);unclassified(100);unclassified(100);	0	3.00568e-06	3.00568e-06	3.00568e-06	1.50284e-05	3.00568e-06	0
Otu000708	9	Bacteria(100);Chloroflexi(100);Chloroflexia(100);Chloroflexales(100);Roseiflexaceae(100);Roseiflexus(100);	6.01137e-06	3.00568e-06	6.01137e-06	6.01137e-06	3.00568e-06	0	0
Otu000709	9	Bacteria(100);Proteobacteria(100);Alphaproteobacteria(100);Rhizobiales(100);Rhizobiales_Incertae_Sedis(100);Bauldia(100);	6.01137e-06	3.00568e-06	0	6.01137e-06	3.00568e-06	0	0
Otu000710	9	Bacteria(100);Bacteroidetes(100);unclassified(100);unclassified(100);unclassified(100);unclassified(100);	1.50284e-05	3.00568e-06	0	0	0	0	0
Otu000711	9	Bacteria(100);Bacteroidetes(100);Flavobacteriia(100);Flavobacteriales(100);Flavobacteriaceae(100);Empedobacter(100);	0	3.00568e-06	2.40455e-05	0	0	0	0
Otu000712	9	Bacteria(100);Cyanobacteria(100);Cyanobacteria(100);SubsectionIII(100);FamilyI(100);Leptolyngbya(78);	0	0	0	0	6.01137e-06	0	1.80341e-05
Otu000713	9	Bacteria(100);Bacteroidetes(100);Flavobacteriia(100);Flavobacteriales(100);Cryomorphaceae(100);Owenweeksia(89);	2.40455e-05	0	0	0	0	0	0
Otu000714	9	Bacteria(100);Proteobacteria(100);Betaproteobacteria(100);Nitrosomonadales(100);Nitrosomonadaceae(100);Nitrosomonas(100);	1.20227e-05	0	0	1.50284e-05	0	0	0
Otu000715	9	Bacteria(100);Chloroflexi(100);TK10(100);unclassified(100);unclassified(100);unclassified(100);	2.40455e-05	0	0	0	0	0	0
Otu000716	9	Bacteria(100);Cyanobacteria(100);Cyanobacteria(100);SubsectionIII(100);FamilyI(100);unclassified(100);	0	0	0	9.01705e-06	0	6.01137e-06	0
Otu000717	9	Bacteria(100);Proteobacteria(100);Betaproteobacteria(100);Rhodocyclales(100);Rhodocyclaceae(100);unclassified(100);	0	0	3.00568e-06	9.01705e-06	9.01705e-06	3.00568e-06	0
Otu000718	9	Bacteria(100);Bacteroidetes(100);Sphingobacteriia(100);Sphingobacteriales(100);Saprospiraceae(100);unclassified(100);	3.00568e-06	0	6.01137e-06	6.01137e-06	0	0	0
Otu000719	9	Bacteria(100);Proteobacteria(100);Betaproteobacteria(100);Rhodocyclales(100);Rhodocyclaceae(100);Zoogloea(78);	6.01137e-06	3.00568e-06	3.00568e-06	6.01137e-06	0	0	9.01705e-06
Otu000720	9	Bacteria(100);Chlorobi(100);Ignavibacteria(100);Ignavibacteriales(100);Ignavibacteriaceae(100);Ignavibacterium(100);	0	0	9.01705e-06	6.01137e-06	9.01705e-06	0	9.01705e-06
Otu000721	9	Bacteria(100);Proteobacteria(100);Betaproteobacteria(100);Rhodocyclales(100);Rhodocyclaceae(100);unclassified(67);	0	0	6.01137e-06	9.01705e-06	3.00568e-06	0	0
Otu000722	9	Bacteria(100);Bacteroidetes(100);Sphingobacteriia(100);Sphingobacteriales(100);Chitinophagaceae(100);Niabella(100);	0	3.00568e-06	0	1.20227e-05	9.01705e-06	3.00568e-06	0
Otu000723	9	Bacteria(100);Proteobacteria(100);Betaproteobacteria(100);unclassified(100);unclassified(100);unclassified(100);	3.00568e-06	6.01137e-06	6.01137e-06	6.01137e-06	0	0	0
Otu000724	9	Bacteria(100);Proteobacteria(100);Alphaproteobacteria(100);Sphingomonadales(100);Sphingomonadaceae(100);Sphingomonas(100);	1.50284e-05	0	0	0	0	0	0
Otu000725	9	Bacteria(100);Proteobacteria(100);Betaproteobacteria(100);Rhodocyclales(100);Rhodocyclaceae(100);Candidatus_Accumulibacter(89);	6.01137e-06	1.20227e-05	9.01705e-06	0	0	0	0
Otu000726	9	Bacteria(100);Proteobacteria(100);Betaproteobacteria(100);Rhodocyclales(100);Rhodocyclaceae(100);unclassified(100);	3.00568e-06	3.00568e-06	6.01137e-06	3.00568e-06	9.01705e-06	0	0
Otu000727	9	Bacteria(100);Proteobacteria(100);Betaproteobacteria(100);Rhodocyclales(100);Rhodocyclaceae(100);unclassified(78);	0	0	3.00568e-06	3.00568e-06	6.01137e-06	9.01705e-06	0
Otu000728	9	Bacteria(100);Verrucomicrobia(100);Opitutae(100);unclassified(100);unclassified(100);unclassified(100);	0	1.80341e-05	0	3.00568e-06	6.01137e-06	0	0
Otu000729	9	Bacteria(100);Proteobacteria(100);Betaproteobacteria(100);Rhodocyclales(100);Rhodocyclaceae(100);Candidatus_Accumulibacter(100);	9.01705e-06	6.01137e-06	3.00568e-06	0	3.00568e-06	0	0
Otu000730	9	Bacteria(100);Verrucomicrobia(100);Verrucomicrobiae(100);Verrucomicrobiales(100);Verrucomicrobiaceae(100);Haloferula(100);	9.01705e-06	6.01137e-06	0	3.00568e-06	0	0	0
Otu000731	9	Bacteria(100);unclassified(100);unclassified(100);unclassified(100);unclassified(100);unclassified(100);	0	0	3.00568e-06	6.01137e-06	6.01137e-06	0	0
Otu000732	9	Bacteria(100);Proteobacteria(100);Betaproteobacteria(100);Rhodocyclales(100);Rhodocyclaceae(100);Candidatus_Accumulibacter(100);	9.01705e-06	3.00568e-06	6.01137e-06	0	6.01137e-06	0	0
Otu000733	9	Bacteria(100);Chloroflexi(100);Anaerolineae(100);Anaerolineales(100);Anaerolineaceae(100);unclassified(100);	1.50284e-05	3.00568e-06	0	0	0	0	0
Otu000734	9	Bacteria(100);Proteobacteria(100);Betaproteobacteria(100);Rhodocyclales(100);Rhodocyclaceae(100);Candidatus_Accumulibacter(100);	3.00568e-06	3.00568e-06	9.01705e-06	6.01137e-06	6.01137e-06	0	0
Otu000735	8	Bacteria(100);unclassified(100);unclassified(100);unclassified(100);unclassified(100);unclassified(100);	0	3.00568e-06	3.00568e-06	3.00568e-06	3.00568e-06	6.01137e-06	9.01705e-06
Otu000736	8	Bacteria(100);Actinobacteria(100);Acidimicrobiia(100);Acidimicrobiales(100);unclassified(100);unclassified(100);	1.80341e-05	0	0	0	0	0	0
Otu000737	8	Bacteria(100);unclassified(100);unclassified(100);unclassified(100);unclassified(100);unclassified(100);	1.50284e-05	3.00568e-06	0	0	0	6.01137e-06	0
Otu000738	8	Bacteria(100);Cyanobacteria(100);Melainabacteria(100);Obscuribacterales(100);unclassified(100);unclassified(100);	0	0	0	0	6.01137e-06	0	9.01705e-06
Otu000739	8	Bacteria(100);unclassified(100);unclassified(100);unclassified(100);unclassified(100);unclassified(100);	3.00568e-06	3.00568e-06	3.00568e-06	6.01137e-06	0	0	9.01705e-06
Otu000740	8	Bacteria(100);unclassified(100);unclassified(100);unclassified(100);unclassified(100);unclassified(100);	0	0	3.00568e-06	9.01705e-06	1.20227e-05	0	0
Otu000741	8	Bacteria(100);Proteobacteria(100);Gammaproteobacteria(100);Xanthomonadales(100);Xanthomonadaceae(100);unclassified(100);	9.01705e-06	6.01137e-06	0	6.01137e-06	3.00568e-06	0	0
Otu000742	8	Bacteria(100);Proteobacteria(100);Betaproteobacteria(100);SC-I-84(100);unclassified(100);unclassified(100);	3.00568e-06	3.00568e-06	9.01705e-06	0	3.00568e-06	3.00568e-06	0
Otu000743	8	Bacteria(100);Proteobacteria(100);unclassified(100);unclassified(100);unclassified(100);unclassified(100);	1.20227e-05	0	0	0	0	0	0
Otu000744	8	Bacteria(100);Cyanobacteria(100);Chloroplast(100);unclassified(100);unclassified(100);unclassified(100);	0	9.01705e-06	0	3.00568e-06	0	3.00568e-06	0
Otu000745	8	Bacteria(100);Planctomycetes(100);OM190(100);unclassified(100);unclassified(100);unclassified(100);	1.50284e-05	3.00568e-06	0	0	0	0	0
Otu000746	8	Bacteria(100);Proteobacteria(100);Alphaproteobacteria(100);Caulobacterales(100);Caulobacteraceae(100);Brevundimonas(100);	1.50284e-05	0	0	0	0	3.00568e-06	9.01705e-06
Otu000747	8	Bacteria(100);Planctomycetes(100);Planctomycetacia(100);Planctomycetales(100);Planctomycetaceae(100);Singulisphaera(100);	3.00568e-06	0	0	3.00568e-06	0	0	9.01705e-06
Otu000748	8	Bacteria(100);Proteobacteria(100);Betaproteobacteria(100);Rhodocyclales(100);Rhodocyclaceae(100);unclassified(100);	0	0	3.00568e-06	3.00568e-06	3.00568e-06	6.01137e-06	0
Otu000749	8	Bacteria(100);Proteobacteria(100);Betaproteobacteria(100);Nitrosomonadales(100);Nitrosomonadaceae(100);Nitrosomonas(100);	2.10398e-05	0	0	0	0	0	0
Otu000750	8	Bacteria(100);Proteobacteria(100);Betaproteobacteria(100);unclassified(100);unclassified(100);unclassified(100);	0	0	6.01137e-06	3.00568e-06	9.01705e-06	3.00568e-06	0
Otu000751	8	Bacteria(100);Chlorobi(100);Chlorobia(100);Chlorobiales(100);SJA-28(100);unclassified(100);	6.01137e-06	0	3.00568e-06	0	3.00568e-06	9.01705e-06	0
Otu000752	8	Bacteria(100);Bacteroidetes(100);Sphingobacteriia(100);Sphingobacteriales(100);PHOS-HE51(100);unclassified(100);	1.20227e-05	6.01137e-06	0	0	0	0	0
Otu000753	8	Bacteria(100);Bacteroidetes(100);Sphingobacteriia(100);Sphingobacteriales(100);Chitinophagaceae(100);unclassified(100);	1.50284e-05	0	0	0	3.00568e-06	0	9.01705e-06
Otu000754	8	Bacteria(100);Bacteroidetes(100);Sphingobacteriia(100);Sphingobacteriales(100);Saprospiraceae(100);Lewinella(100);	0	0	0	3.00568e-06	0	9.01705e-06	0
Otu000755	8	Bacteria(100);Bacteroidetes(100);Sphingobacteriia(100);Sphingobacteriales(100);Chitinophagaceae(100);Ferruginibacter(100);	6.01137e-06	0	0	0	0	9.01705e-06	1.80341e-05
Otu000756	8	Bacteria(100);Chloroflexi(100);unclassified(100);unclassified(100);unclassified(100);unclassified(100);	1.80341e-05	0	0	0	0	0	0
Otu000757	8	Bacteria(100);Proteobacteria(100);Betaproteobacteria(100);unclassified(100);unclassified(100);unclassified(100);	3.00568e-06	0	6.01137e-06	0	9.01705e-06	0	0
Otu000758	8	Bacteria(100);Proteobacteria(100);Betaproteobacteria(100);unclassified(100);unclassified(100);unclassified(100);	3.00568e-06	1.20227e-05	0	0	6.01137e-06	0	0
Otu000759	8	Bacteria(100);Bacteroidetes(100);Sphingobacteriia(100);Sphingobacteriales(100);Chitinophagaceae(100);unclassified(100);	9.01705e-06	6.01137e-06	0	0	0	0	0
Otu000760	8	Bacteria(100);Bacteroidetes(100);Sphingobacteriia(100);Sphingobacteriales(100);Chitinophagaceae(100);unclassified(100);	6.01137e-06	3.00568e-06	6.01137e-06	0	3.00568e-06	0	0
Otu000761	8	Bacteria(100);Chlorobi(100);Chlorobia(100);Chlorobiales(100);SJA-28(100);unclassified(100);	0	0	3.00568e-06	3.00568e-06	3.00568e-06	6.01137e-06	0
Otu000762	8	Bacteria(100);Bacteroidetes(100);Sphingobacteriia(100);Sphingobacteriales(100);Saprospiraceae(88);unclassified(88);	3.00568e-06	3.00568e-06	9.01705e-06	3.00568e-06	0	3.00568e-06	0
Otu000763	8	Bacteria(100);Bacteroidetes(100);Sphingobacteriia(100);Sphingobacteriales(100);Chitinophagaceae(100);Ferruginibacter(100);	0	0	3.00568e-06	0	3.00568e-06	9.01705e-06	2.70512e-05
Otu000764	8	Bacteria(100);Proteobacteria(100);Betaproteobacteria(100);Burkholderiales(100);Comamonadaceae(100);unclassified(100);	3.00568e-06	0	0	6.01137e-06	0	0	1.80341e-05
Otu000765	8	Bacteria(100);Chlorobi(100);Chlorobia(100);Chlorobiales(100);SJA-28(100);unclassified(100);	0	3.00568e-06	0	0	3.00568e-06	1.20227e-05	0
Otu000766	8	Bacteria(100);unclassified(100);unclassified(100);unclassified(100);unclassified(100);unclassified(100);	3.00568e-06	9.01705e-06	0	0	0	0	0
Otu000767	8	Bacteria(100);Proteobacteria(100);Alphaproteobacteria(100);Rhizobiales(100);unclassified(100);unclassified(100);	1.20227e-05	0	0	6.01137e-06	3.00568e-06	0	0
Otu000768	8	Bacteria(100);Chlamydiae(100);Chlamydiae(100);Chlamydiales(100);Parachlamydiaceae(100);Candidatus_Protochlamydia(88);	9.01705e-06	9.01705e-06	0	3.00568e-06	0	0	0
Otu000769	8	Bacteria(100);Proteobacteria(100);Betaproteobacteria(100);unclassified(100);unclassified(100);unclassified(100);	6.01137e-06	3.00568e-06	6.01137e-06	0	0	0	0
Otu000770	8	Bacteria(100);Proteobacteria(100);Alphaproteobacteria(100);Sphingomonadales(100);Sphingomonadaceae(100);Sphingobium(100);	3.00568e-06	0	3.00568e-06	3.00568e-06	0	6.01137e-06	0
Otu000771	8	Bacteria(100);Proteobacteria(100);Betaproteobacteria(100);Rhodocyclales(100);Rhodocyclaceae(100);unclassified(100);	9.01705e-06	6.01137e-06	0	0	0	6.01137e-06	0
Otu000772	8	Bacteria(100);Proteobacteria(100);Betaproteobacteria(100);Rhodocyclales(100);Rhodocyclaceae(100);Candidatus_Accumulibacter(100);	3.00568e-06	0	3.00568e-06	0	6.01137e-06	6.01137e-06	9.01705e-06
Otu000773	8	Bacteria(100);Proteobacteria(100);Betaproteobacteria(100);Rhodocyclales(100);Rhodocyclaceae(100);unclassified(100);	0	0	0	3.00568e-06	3.00568e-06	6.01137e-06	9.01705e-06
Otu000774	8	Bacteria(100);Proteobacteria(100);Betaproteobacteria(100);Rhodocyclales(100);Rhodocyclaceae(100);unclassified(100);	3.00568e-06	3.00568e-06	6.01137e-06	3.00568e-06	0	3.00568e-06	0
Otu000775	8	Bacteria(100);Proteobacteria(100);Betaproteobacteria(100);Rhodocyclales(100);Rhodocyclaceae(100);unclassified(63);	0	3.00568e-06	3.00568e-06	0	6.01137e-06	0	0
Otu000776	8	Bacteria(100);Proteobacteria(100);Betaproteobacteria(100);Rhodocyclales(100);Rhodocyclaceae(100);Candidatus_Accumulibacter(100);	3.00568e-06	3.00568e-06	0	3.00568e-06	0	3.00568e-06	0
Otu000777	8	Bacteria(100);Proteobacteria(100);Betaproteobacteria(100);Rhodocyclales(100);Rhodocyclaceae(100);Candidatus_Accumulibacter(100);	0	3.00568e-06	3.00568e-06	9.01705e-06	0	6.01137e-06	9.01705e-06
Otu000778	8	Bacteria(100);Proteobacteria(100);Betaproteobacteria(100);Rhodocyclales(100);Rhodocyclaceae(100);unclassified(88);	3.00568e-06	3.00568e-06	3.00568e-06	0	0	3.00568e-06	9.01705e-06
Otu000779	8	Bacteria(100);Actinobacteria(100);Actinobacteria(100);Micrococcales(100);Microbacteriaceae(100);unclassified(75);	9.01705e-06	0	3.00568e-06	3.00568e-06	0	0	0
Otu000780	8	Bacteria(100);Proteobacteria(100);Betaproteobacteria(100);Rhodocyclales(100);Rhodocyclaceae(100);Candidatus_Accumulibacter(88);	0	0	6.01137e-06	9.01705e-06	3.00568e-06	0	0
Otu000781	8	Bacteria(100);Actinobacteria(100);Actinobacteria(100);Micrococcales(100);Microbacteriaceae(100);Microbacterium(88);	1.50284e-05	0	0	0	0	6.01137e-06	0
Otu000782	8	Bacteria(100);Proteobacteria(100);Alphaproteobacteria(100);unclassified(100);unclassified(100);unclassified(100);	3.00568e-06	6.01137e-06	9.01705e-06	0	0	0	0
Otu000783	8	Bacteria(100);Proteobacteria(100);Betaproteobacteria(100);Rhodocyclales(100);Rhodocyclaceae(100);Candidatus_Accumulibacter(100);	0	0	3.00568e-06	3.00568e-06	6.01137e-06	3.00568e-06	9.01705e-06
Otu000784	8	Bacteria(100);Proteobacteria(100);Betaproteobacteria(100);unclassified(100);unclassified(100);unclassified(100);	0	3.00568e-06	6.01137e-06	6.01137e-06	0	9.01705e-06	0
Otu000785	8	Bacteria(100);Proteobacteria(100);Betaproteobacteria(100);Rhodocyclales(100);Rhodocyclaceae(100);unclassified(100);	0	0	0	3.00568e-06	6.01137e-06	6.01137e-06	0
Otu000786	7	Bacteria(100);Proteobacteria(100);Gammaproteobacteria(100);Alteromonadales(100);Alteromonadaceae(100);C1-B045(100);	3.00568e-06	0	0	6.01137e-06	6.01137e-06	0	0
Otu000787	7	Bacteria(100);Bacteroidetes(100);unclassified(100);unclassified(100);unclassified(100);unclassified(100);	6.01137e-06	9.01705e-06	3.00568e-06	3.00568e-06	0	0	0
Otu000788	7	Bacteria(100);Proteobacteria(100);Betaproteobacteria(100);unclassified(100);unclassified(100);unclassified(100);	3.00568e-06	0	6.01137e-06	6.01137e-06	3.00568e-06	0	0
Otu000789	7	Bacteria(100);Proteobacteria(100);Gammaproteobacteria(100);Xanthomonadales(100);Xanthomonadaceae(100);unclassified(100);	9.01705e-06	3.00568e-06	0	3.00568e-06	0	0	0
Otu000790	7	Bacteria(100);Proteobacteria(100);Betaproteobacteria(100);unclassified(100);unclassified(100);unclassified(100);	0	3.00568e-06	0	9.01705e-06	0	0	0
Otu000791	7	Bacteria(100);Bacteroidetes(100);unclassified(100);unclassified(100);unclassified(100);unclassified(100);	0	0	6.01137e-06	6.01137e-06	3.00568e-06	3.00568e-06	0
Otu000792	7	Bacteria(100);Bacteroidetes(100);Sphingobacteriia(100);Sphingobacteriales(100);Saprospiraceae(100);Lewinella(100);	0	9.01705e-06	0	3.00568e-06	0	0	0
Otu000793	7	Bacteria(100);Chloroflexi(100);unclassified(100);unclassified(100);unclassified(100);unclassified(100);	0	0	6.01137e-06	0	3.00568e-06	9.01705e-06	0
Otu000794	7	Bacteria(100);Bacteroidetes(100);Sphingobacteriia(100);Sphingobacteriales(100);Chitinophagaceae(100);Ferruginibacter(100);	0	0	3.00568e-06	0	0	3.00568e-06	2.70512e-05
Otu000795	7	Bacteria(100);Bacteroidetes(100);Sphingobacteriia(100);Sphingobacteriales(100);Saprospiraceae(100);Lewinella(100);	3.00568e-06	1.20227e-05	3.00568e-06	0	0	0	0
Otu000796	7	Bacteria(100);Bacteroidetes(100);Sphingobacteriia(100);Sphingobacteriales(100);Chitinophagaceae(100);Sediminibacterium(86);	0	0	0	0	0	6.01137e-06	0
Otu000797	7	Bacteria(100);Chloroflexi(100);Thermomicrobia(100);JG30-KF-CM45(100);unclassified(100);unclassified(100);	9.01705e-06	0	0	0	3.00568e-06	0	0
Otu000798	7	Bacteria(100);Bacteroidetes(100);Sphingobacteriia(100);Sphingobacteriales(100);Chitinophagaceae(100);unclassified(100);	9.01705e-06	0	3.00568e-06	0	0	0	1.80341e-05
Otu000799	7	Bacteria(100);Chlorobi(100);unclassified(100);unclassified(100);unclassified(100);unclassified(100);	0	3.00568e-06	3.00568e-06	3.00568e-06	9.01705e-06	0	0
Otu000800	7	Bacteria(100);Planctomycetes(100);vadinHA49(100);unclassified(100);unclassified(100);unclassified(100);	0	0	3.00568e-06	6.01137e-06	3.00568e-06	3.00568e-06	9.01705e-06
Otu000801	7	Bacteria(100);Actinobacteria(100);Actinobacteria(100);Micrococcales(100);Dermatophilaceae(100);Kineosphaera(100);	2.10398e-05	0	0	0	0	0	0
Otu000802	7	Bacteria(100);Candidate_division_TM7(100);unclassified(100);unclassified(100);unclassified(100);unclassified(100);	0	0	6.01137e-06	0	9.01705e-06	6.01137e-06	0
Otu000803	7	Bacteria(100);Proteobacteria(100);Alphaproteobacteria(100);Rhizobiales(100);Methylobacteriaceae(100);Methylobacterium(100);	3.00568e-06	3.00568e-06	0	0	3.00568e-06	3.00568e-06	0
Otu000804	7	Bacteria(100);Proteobacteria(100);Betaproteobacteria(100);Rhodocyclales(100);Rhodocyclaceae(100);Candidatus_Accumulibacter(100);	0	6.01137e-06	0	3.00568e-06	3.00568e-06	0	9.01705e-06
Otu000805	7	Bacteria(100);Proteobacteria(100);Betaproteobacteria(100);Rhodocyclales(100);Rhodocyclaceae(100);Candidatus_Accumulibacter(86);	0	0	0	6.01137e-06	6.01137e-06	3.00568e-06	0
Otu000806	7	Bacteria(100);Bacteroidetes(100);Bacteroidia(100);Bacteroidales(100);Rikenellaceae(100);vadinBC27_wastewater-sludge_group(100);	1.20227e-05	3.00568e-06	0	0	0	0	0
Otu000807	7	Bacteria(100);Proteobacteria(100);Alphaproteobacteria(100);unclassified(100);unclassified(100);unclassified(100);	1.50284e-05	0	0	0	0	0	0
Otu000808	7	Bacteria(100);Proteobacteria(100);Betaproteobacteria(100);Rhodocyclales(100);Rhodocyclaceae(100);Candidatus_Accumulibacter(86);	0	0	0	0	9.01705e-06	3.00568e-06	0
Otu000809	7	Bacteria(100);Proteobacteria(100);Betaproteobacteria(100);Rhodocyclales(100);Rhodocyclaceae(100);unclassified(86);	3.00568e-06	9.01705e-06	9.01705e-06	0	0	0	0
Otu000810	7	Bacteria(100);Proteobacteria(100);Betaproteobacteria(100);Rhodocyclales(100);Rhodocyclaceae(100);unclassified(100);	0	3.00568e-06	3.00568e-06	3.00568e-06	0	3.00568e-06	9.01705e-06
Otu000811	7	Bacteria(100);Cyanobacteria(100);Cyanobacteria(100);unclassified(100);unclassified(100);unclassified(100);	0	0	0	6.01137e-06	3.00568e-06	3.00568e-06	0
Otu000812	7	Bacteria(100);Chlorobi(100);Chlorobia(100);Chlorobiales(100);SJA-28(100);unclassified(100);	0	3.00568e-06	6.01137e-06	3.00568e-06	6.01137e-06	3.00568e-06	0
Otu000813	7	Bacteria(100);Chlorobi(100);Chlorobia(100);Chlorobiales(100);SJA-28(100);unclassified(100);	0	3.00568e-06	6.01137e-06	3.00568e-06	0	9.01705e-06	0
Otu000814	7	Bacteria(100);Proteobacteria(100);Betaproteobacteria(100);Rhodocyclales(100);Rhodocyclaceae(100);unclassified(72);	0	0	6.01137e-06	3.00568e-06	6.01137e-06	3.00568e-06	0
Otu000815	7	Bacteria(100);Proteobacteria(100);Betaproteobacteria(100);Rhodocyclales(100);Rhodocyclaceae(100);unclassified(100);	3.00568e-06	0	0	6.01137e-06	0	0	1.80341e-05
Otu000816	7	Bacteria(100);Proteobacteria(100);Betaproteobacteria(100);Rhodocyclales(100);Rhodocyclaceae(100);unclassified(86);	0	1.50284e-05	3.00568e-06	0	0	0	0
Otu000817	7	Bacteria(100);Proteobacteria(100);Betaproteobacteria(100);Rhodocyclales(100);Rhodocyclaceae(100);Candidatus_Accumulibacter(72);	0	0	3.00568e-06	0	6.01137e-06	6.01137e-06	0
Otu000818	7	Bacteria(100);Proteobacteria(100);Betaproteobacteria(100);Rhodocyclales(100);Rhodocyclaceae(100);unclassified(86);	3.00568e-06	0	0	6.01137e-06	3.00568e-06	3.00568e-06	9.01705e-06
Otu000819	7	Bacteria(100);Proteobacteria(100);Betaproteobacteria(100);Rhodocyclales(100);Rhodocyclaceae(100);unclassified(72);	3.00568e-06	9.01705e-06	0	0	0	0	0
Otu000820	7	Bacteria(100);Chloroflexi(100);Anaerolineae(100);Anaerolineales(100);Anaerolineaceae(100);unclassified(100);	0	0	6.01137e-06	0	3.00568e-06	6.01137e-06	0
Otu000821	7	Bacteria(100);Proteobacteria(100);Betaproteobacteria(100);Rhodocyclales(100);Rhodocyclaceae(100);unclassified(100);	3.00568e-06	6.01137e-06	0	6.01137e-06	3.00568e-06	0	0
Otu000822	7	Bacteria(100);Proteobacteria(100);Betaproteobacteria(100);Rhodocyclales(100);Rhodocyclaceae(100);unclassified(86);	3.00568e-06	9.01705e-06	0	3.00568e-06	0	0	0
Otu000823	7	Bacteria(100);Proteobacteria(100);Betaproteobacteria(100);Rhodocyclales(100);Rhodocyclaceae(100);unclassified(72);	3.00568e-06	0	6.01137e-06	0	3.00568e-06	0	0
Otu000824	7	Bacteria(100);Actinobacteria(100);Actinobacteria(100);Corynebacteriales(100);Mycobacteriaceae(100);Mycobacterium(100);	9.01705e-06	0	6.01137e-06	3.00568e-06	0	0	0
Otu000825	7	Bacteria(100);Proteobacteria(100);Betaproteobacteria(100);Rhodocyclales(100);Rhodocyclaceae(100);unclassified(100);	0	0	9.01705e-06	0	6.01137e-06	0	0
Otu000826	7	Bacteria(100);Actinobacteria(100);Actinobacteria(100);Corynebacteriales(100);Nocardiaceae(100);Rhodococcus(100);	9.01705e-06	0	3.00568e-06	3.00568e-06	0	0	9.01705e-06
Otu000827	7	Bacteria(100);Proteobacteria(100);Betaproteobacteria(100);Rhodocyclales(100);Rhodocyclaceae(100);unclassified(100);	0	0	0	0	0	3.00568e-06	9.01705e-06
Otu000828	7	Bacteria(100);Proteobacteria(100);unclassified(100);unclassified(100);unclassified(100);unclassified(100);	0	0	0	6.01137e-06	0	6.01137e-06	0
Otu000829	7	Bacteria(100);Chlorobi(100);Chlorobia(100);Chlorobiales(100);SJA-28(100);unclassified(100);	0	0	3.00568e-06	0	0	0	1.80341e-05
Otu000830	7	Bacteria(100);unclassified(100);unclassified(100);unclassified(100);unclassified(100);unclassified(100);	0	3.00568e-06	0	0	9.01705e-06	3.00568e-06	0
Otu000831	7	Bacteria(100);Bacteroidetes(100);Flavobacteriia(100);Flavobacteriales(100);Flavobacteriaceae(100);Flavobacterium(100);	0	9.01705e-06	3.00568e-06	3.00568e-06	3.00568e-06	0	0
Otu000832	7	Bacteria(100);Chlorobi(100);Chlorobia(100);Chlorobiales(100);SJA-28(100);unclassified(100);	0	0	0	0	3.00568e-06	9.01705e-06	0
Otu000833	7	Bacteria(100);Chlorobi(100);Chlorobia(100);Chlorobiales(100);SJA-28(100);unclassified(100);	0	0	0	3.00568e-06	9.01705e-06	3.00568e-06	0
Otu000834	7	Bacteria(100);Planctomycetes(100);Planctomycetacia(100);Planctomycetales(100);Planctomycetaceae(100);Planctomyces(100);	0	0	6.01137e-06	0	3.00568e-06	0	1.80341e-05
Otu000835	7	Bacteria(100);Cyanobacteria(100);Melainabacteria(100);Obscuribacterales(100);unclassified(100);unclassified(100);	0	0	0	0	0	3.00568e-06	9.01705e-06
Otu000836	7	Bacteria(100);Proteobacteria(100);Betaproteobacteria(100);Burkholderiales(100);Comamonadaceae(100);unclassified(100);	0	6.01137e-06	0	0	9.01705e-06	0	0
Otu000837	7	Bacteria(100);unclassified(100);unclassified(100);unclassified(100);unclassified(100);unclassified(100);	0	0	0	0	6.01137e-06	9.01705e-06	0
Otu000838	7	Bacteria(100);unclassified(100);unclassified(100);unclassified(100);unclassified(100);unclassified(100);	0	0	0	0	0	9.01705e-06	0
Otu000839	7	Bacteria(100);Proteobacteria(100);Betaproteobacteria(100);Rhodocyclales(100);Rhodocyclaceae(100);unclassified(100);	0	0	3.00568e-06	3.00568e-06	3.00568e-06	0	0
Otu000840	7	Bacteria(100);unclassified(100);unclassified(100);unclassified(100);unclassified(100);unclassified(100);	0	0	6.01137e-06	3.00568e-06	3.00568e-06	0	1.80341e-05
Otu000841	7	Bacteria(100);Bacteroidetes(100);Flavobacteriia(100);Flavobacteriales(100);Flavobacteriaceae(100);Flavobacterium(100);	0	6.01137e-06	9.01705e-06	0	3.00568e-06	3.00568e-06	0
Otu000842	7	Bacteria(100);unclassified(100);unclassified(100);unclassified(100);unclassified(100);unclassified(100);	0	0	0	0	9.01705e-06	3.00568e-06	9.01705e-06
Otu000843	7	Bacteria(100);Proteobacteria(100);Alphaproteobacteria(100);Rickettsiales(100);AKIW1012(100);unclassified(100);	1.20227e-05	3.00568e-06	0	0	0	0	0
Otu000844	6	Bacteria(100);Bacteroidetes(100);Sphingobacteriia(100);Sphingobacteriales(100);Saprospiraceae(100);unclassified(100);	0	3.00568e-06	0	6.01137e-06	6.01137e-06	3.00568e-06	0
Otu000845	6	Bacteria(100);Proteobacteria(100);unclassified(100);unclassified(100);unclassified(100);unclassified(100);	3.00568e-06	9.01705e-06	3.00568e-06	0	0	0	0
Otu000846	6	Bacteria(100);Proteobacteria(100);Betaproteobacteria(100);Rhodocyclales(100);Rhodocyclaceae(100);unclassified(100);	0	3.00568e-06	3.00568e-06	0	6.01137e-06	3.00568e-06	9.01705e-06
Otu000847	6	Bacteria(100);Proteobacteria(100);unclassified(100);unclassified(100);unclassified(100);unclassified(100);	0	0	9.01705e-06	6.01137e-06	0	0	0
Otu000848	6	Bacteria(100);Proteobacteria(100);unclassified(100);unclassified(100);unclassified(100);unclassified(100);	0	0	3.00568e-06	6.01137e-06	3.00568e-06	6.01137e-06	0
Otu000849	6	Bacteria(100);Chlorobi(100);Chlorobia(100);Chlorobiales(100);SJA-28(100);unclassified(100);	0	0	0	0	0	6.01137e-06	0
Otu000850	6	Bacteria(100);Chlorobi(100);Chlorobia(100);Chlorobiales(100);SJA-28(100);unclassified(100);	0	0	0	3.00568e-06	3.00568e-06	3.00568e-06	0
Otu000851	6	Bacteria(100);Proteobacteria(100);unclassified(100);unclassified(100);unclassified(100);unclassified(100);	0	6.01137e-06	0	6.01137e-06	3.00568e-06	0	0
Otu000852	6	Bacteria(100);Proteobacteria(100);Betaproteobacteria(100);Rhodocyclales(100);Rhodocyclaceae(100);Candidatus_Accumulibacter(84);	0	6.01137e-06	0	3.00568e-06	0	3.00568e-06	0
Otu000853	6	Bacteria(100);Proteobacteria(100);unclassified(100);unclassified(100);unclassified(100);unclassified(100);	0	6.01137e-06	6.01137e-06	0	6.01137e-06	0	0
Otu000854	6	Bacteria(100);Bacteroidetes(100);unclassified(100);unclassified(100);unclassified(100);unclassified(100);	1.20227e-05	0	0	0	0	0	0
Otu000855	6	Bacteria(100);Proteobacteria(100);Betaproteobacteria(100);Rhodocyclales(100);Rhodocyclaceae(100);Candidatus_Accumulibacter(84);	3.00568e-06	6.01137e-06	0	3.00568e-06	3.00568e-06	0	0
Otu000856	6	Bacteria(100);unclassified(100);unclassified(100);unclassified(100);unclassified(100);unclassified(100);	0	0	0	0	0	3.00568e-06	1.80341e-05
Otu000857	6	Bacteria(100);unclassified(100);unclassified(100);unclassified(100);unclassified(100);unclassified(100);	0	6.01137e-06	6.01137e-06	3.00568e-06	0	0	0
Otu000858	6	Bacteria(100);unclassified(100);unclassified(100);unclassified(100);unclassified(100);unclassified(100);	6.01137e-06	0	3.00568e-06	0	0	0	0
Otu000859	6	Bacteria(100);Proteobacteria(100);Betaproteobacteria(100);Rhodocyclales(100);Rhodocyclaceae(100);unclassified(100);	0	0	6.01137e-06	0	3.00568e-06	0	9.01705e-06
Otu000860	6	Bacteria(100);unclassified(100);unclassified(100);unclassified(100);unclassified(100);unclassified(100);	0	0	0	0	3.00568e-06	1.20227e-05	9.01705e-06
Otu000861	6	Bacteria(100);Bacteroidetes(100);Sphingobacteriia(100);Sphingobacteriales(100);Chitinophagaceae(100);unclassified(100);	0	3.00568e-06	6.01137e-06	0	0	3.00568e-06	0
Otu000862	6	Bacteria(100);Cyanobacteria(100);Melainabacteria(100);Obscuribacterales(100);unclassified(100);unclassified(100);	0	0	0	0	6.01137e-06	3.00568e-06	0
Otu000863	6	Bacteria(100);unclassified(100);unclassified(100);unclassified(100);unclassified(100);unclassified(100);	6.01137e-06	0	3.00568e-06	0	3.00568e-06	0	0
Otu000864	6	Bacteria(100);unclassified(100);unclassified(100);unclassified(100);unclassified(100);unclassified(100);	0	0	0	1.20227e-05	0	0	0
Otu000865	6	Bacteria(100);unclassified(100);unclassified(100);unclassified(100);unclassified(100);unclassified(100);	0	0	3.00568e-06	0	3.00568e-06	3.00568e-06	0
Otu000866	6	Bacteria(100);unclassified(100);unclassified(100);unclassified(100);unclassified(100);unclassified(100);	0	0	0	3.00568e-06	0	9.01705e-06	9.01705e-06
Otu000867	6	Bacteria(100);Bacteroidetes(100);Sphingobacteriia(100);Sphingobacteriales(100);Saprospiraceae(100);unclassified(100);	0	0	3.00568e-06	0	3.00568e-06	3.00568e-06	9.01705e-06
Otu000868	6	Bacteria(100);Spirochaetae(100);Spirochaetes(100);Spirochaetales(100);Spirochaetaceae(100);unclassified(100);	1.50284e-05	0	0	0	0	0	0
Otu000869	6	Bacteria(100);Gemmatimonadetes(100);Gemmatimonadetes(100);Gemmatimonadales(100);Gemmatimonadaceae(100);Gemmatimonas(100);	9.01705e-06	0	0	0	0	0	0
Otu000870	6	Bacteria(100);unclassified(100);unclassified(100);unclassified(100);unclassified(100);unclassified(100);	0	0	6.01137e-06	6.01137e-06	3.00568e-06	3.00568e-06	0
Otu000871	6	Bacteria(100);Proteobacteria(100);Gammaproteobacteria(100);Xanthomonadales(100);Xanthomonadaceae(100);Aquimonas(100);	0	9.01705e-06	0	0	0	3.00568e-06	0
Otu000872	6	Bacteria(100);Proteobacteria(100);Betaproteobacteria(100);Rhodocyclales(100);Rhodocyclaceae(100);Candidatus_Accumulibacter(100);	6.01137e-06	6.01137e-06	0	0	0	0	0
Otu000873	6	Bacteria(100);Proteobacteria(100);Betaproteobacteria(100);Rhodocyclales(100);Rhodocyclaceae(100);Sulfuritalea(84);	0	0	3.00568e-06	0	0	0	1.80341e-05
Otu000874	6	Bacteria(100);Proteobacteria(100);Betaproteobacteria(100);Rhodocyclales(100);Rhodocyclaceae(100);Candidatus_Accumulibacter(100);	6.01137e-06	0	6.01137e-06	0	0	3.00568e-06	0
Otu000875	6	Bacteria(100);Proteobacteria(100);Betaproteobacteria(100);Rhodocyclales(100);Rhodocyclaceae(100);Candidatus_Accumulibacter(100);	3.00568e-06	3.00568e-06	0	3.00568e-06	3.00568e-06	0	0
Otu000876	6	Bacteria(100);Proteobacteria(100);Betaproteobacteria(100);Rhodocyclales(100);Rhodocyclaceae(100);Candidatus_Accumulibacter(67);	0	0	0	6.01137e-06	6.01137e-06	0	0
Otu000877	6	Bacteria(100);Proteobacteria(100);Betaproteobacteria(100);Rhodocyclales(100);Rhodocyclaceae(100);unclassified(100);	0	0	0	3.00568e-06	0	6.01137e-06	0
Otu000878	6	Bacteria(100);Proteobacteria(100);Betaproteobacteria(100);Rhodocyclales(100);Rhodocyclaceae(100);Dechloromonas(100);	0	0	3.00568e-06	6.01137e-06	6.01137e-06	3.00568e-06	0
Otu000879	6	Bacteria(100);Proteobacteria(100);Betaproteobacteria(100);Rhodocyclales(100);Rhodocyclaceae(100);unclassified(100);	0	0	0	3.00568e-06	0	6.01137e-06	9.01705e-06
Otu000880	6	Bacteria(100);Bacteroidetes(100);Sphingobacteriia(100);Sphingobacteriales(100);Chitinophagaceae(100);Ferruginibacter(100);	0	6.01137e-06	0	3.00568e-06	0	0	0
Otu000881	6	Bacteria(100);Proteobacteria(100);Alphaproteobacteria(100);Caulobacterales(100);Caulobacteraceae(100);Brevundimonas(100);	0	0	0	3.00568e-06	3.00568e-06	6.01137e-06	0
Otu000882	6	Bacteria(100);Bacteroidetes(100);Sphingobacteriia(100);Sphingobacteriales(100);Chitinophagaceae(100);Sediminibacterium(100);	0	3.00568e-06	0	6.01137e-06	3.00568e-06	3.00568e-06	0
Otu000883	6	Bacteria(100);Bacteroidetes(100);Sphingobacteriia(100);Sphingobacteriales(100);Chitinophagaceae(100);Sediminibacterium(100);	0	0	3.00568e-06	6.01137e-06	0	0	9.01705e-06
Otu000884	6	Bacteria(100);Chloroflexi(100);TK10(100);unclassified(100);unclassified(100);unclassified(100);	1.20227e-05	3.00568e-06	0	0	0	0	0
Otu000885	6	Bacteria(100);Proteobacteria(100);Betaproteobacteria(100);Rhodocyclales(100);Rhodocyclaceae(100);unclassified(100);	0	0	3.00568e-06	0	3.00568e-06	9.01705e-06	0
Otu000886	6	Bacteria(100);Proteobacteria(100);Betaproteobacteria(100);Rhodocyclales(100);Rhodocyclaceae(100);unclassified(100);	0	0	0	0	6.01137e-06	3.00568e-06	9.01705e-06
Otu000887	6	Bacteria(100);Proteobacteria(100);Betaproteobacteria(100);Rhodocyclales(100);Rhodocyclaceae(100);unclassified(100);	0	9.01705e-06	6.01137e-06	0	0	0	0
Otu000888	6	Bacteria(100);unclassified(100);unclassified(100);unclassified(100);unclassified(100);unclassified(100);	0	0	1.20227e-05	0	0	0	0
Otu000889	6	Bacteria(100);Bacteroidetes(100);WCHB1-32(100);unclassified(100);unclassified(100);unclassified(100);	1.20227e-05	0	0	0	0	0	0
Otu000890	6	Bacteria(100);Armatimonadetes(100);Armatimonadia(100);Armatimonadales(100);unclassified(100);unclassified(100);	3.00568e-06	3.00568e-06	0	3.00568e-06	3.00568e-06	6.01137e-06	0
Otu000891	6	Bacteria(100);Chlorobi(100);Ignavibacteria(100);Ignavibacteriales(100);Ignavibacteriaceae(100);Ignavibacterium(100);	0	3.00568e-06	6.01137e-06	9.01705e-06	0	0	0
Otu000892	6	Bacteria(100);Proteobacteria(100);Gammaproteobacteria(100);Xanthomonadales(100);Xanthomonadaceae(100);Rhodanobacter(100);	1.50284e-05	0	0	0	0	0	0
Otu000893	6	Bacteria(100);Planctomycetes(100);Phycisphaerae(100);Phycisphaerales(100);Phycisphaeraceae(100);SM1A02(100);	6.01137e-06	0	0	6.01137e-06	6.01137e-06	0	0
Otu000894	6	Bacteria(100);unclassified(100);unclassified(100);unclassified(100);unclassified(100);unclassified(100);	0	6.01137e-06	6.01137e-06	6.01137e-06	0	0	0
Otu000895	6	Bacteria(100);Proteobacteria(100);Betaproteobacteria(100);Rhodocyclales(100);Rhodocyclaceae(100);unclassified(100);	0	3.00568e-06	3.00568e-06	6.01137e-06	3.00568e-06	3.00568e-06	0
Otu000896	6	Bacteria(100);Proteobacteria(100);Alphaproteobacteria(100);Rickettsiales(100);SM2D12(100);unclassified(100);	1.20227e-05	0	0	0	0	0	0
Otu000897	6	Bacteria(100);Proteobacteria(100);Alphaproteobacteria(100);Rhodobacterales(100);Rhodobacteraceae(100);unclassified(67);	0	0	0	0	3.00568e-06	6.01137e-06	0
Otu000898	6	Bacteria(100);Chloroflexi(100);KD4-96(100);unclassified(100);unclassified(100);unclassified(100);	9.01705e-06	0	0	0	0	0	0
Otu000899	6	Bacteria(100);Bacteroidetes(100);Flavobacteriia(100);Flavobacteriales(100);Flavobacteriaceae(100);unclassified(67);	0	3.00568e-06	3.00568e-06	9.01705e-06	3.00568e-06	0	0
Otu000900	6	Bacteria(100);Proteobacteria(100);Betaproteobacteria(100);unclassified(100);unclassified(100);unclassified(100);	0	0	3.00568e-06	3.00568e-06	3.00568e-06	3.00568e-06	0
Otu000901	6	Bacteria(100);Proteobacteria(100);Betaproteobacteria(100);unclassified(100);unclassified(100);unclassified(100);	3.00568e-06	6.01137e-06	3.00568e-06	3.00568e-06	0	0	0
Otu000902	6	Bacteria(100);Proteobacteria(100);Gammaproteobacteria(100);Xanthomonadales(100);Xanthomonadaceae(100);unclassified(100);	0	1.20227e-05	3.00568e-06	0	0	3.00568e-06	0
Otu000903	6	Bacteria(100);Proteobacteria(100);Betaproteobacteria(100);unclassified(100);unclassified(100);unclassified(100);	0	0	0	3.00568e-06	3.00568e-06	0	9.01705e-06
Otu000904	6	Bacteria(100);Proteobacteria(100);Betaproteobacteria(100);unclassified(100);unclassified(100);unclassified(100);	6.01137e-06	3.00568e-06	0	0	0	0	0
Otu000905	6	Bacteria(100);Proteobacteria(100);Deltaproteobacteria(100);unclassified(100);unclassified(100);unclassified(100);	1.20227e-05	0	0	0	0	0	0
Otu000906	6	Bacteria(100);Proteobacteria(100);Alphaproteobacteria(100);Rhizobiales(100);F0723(100);unclassified(100);	0	3.00568e-06	0	6.01137e-06	0	0	0
Otu000907	6	Bacteria(100);Proteobacteria(100);Gammaproteobacteria(100);Xanthomonadales(100);Nevskiaceae(100);Alkanibacter(100);	3.00568e-06	0	6.01137e-06	0	3.00568e-06	0	0
Otu000908	6	Bacteria(100);Bacteroidetes(100);Flavobacteriia(100);Flavobacteriales(100);Flavobacteriaceae(100);Flavobacterium(100);	6.01137e-06	3.00568e-06	0	3.00568e-06	3.00568e-06	0	0
Otu000909	6	Bacteria(100);Proteobacteria(100);Betaproteobacteria(100);unclassified(100);unclassified(100);unclassified(100);	6.01137e-06	3.00568e-06	0	3.00568e-06	3.00568e-06	0	0
Otu000910	6	Bacteria(100);Proteobacteria(100);Deltaproteobacteria(100);Bdellovibrionales(100);Bdellovibrionaceae(100);Bdellovibrio(100);	0	3.00568e-06	1.20227e-05	0	0	0	0
Otu000911	6	Bacteria(100);Proteobacteria(100);Betaproteobacteria(100);Rhodocyclales(100);Rhodocyclaceae(100);unclassified(100);	3.00568e-06	9.01705e-06	0	3.00568e-06	0	0	0
Otu000912	6	Bacteria(100);Proteobacteria(100);Betaproteobacteria(100);Rhodocyclales(100);Rhodocyclaceae(100);unclassified(84);	0	3.00568e-06	0	0	3.00568e-06	0	9.01705e-06
Otu000913	6	Bacteria(100);Proteobacteria(100);Betaproteobacteria(100);Rhodocyclales(100);Rhodocyclaceae(100);Dechloromonas(84);	0	3.00568e-06	3.00568e-06	0	3.00568e-06	0	0
Otu000914	6	Bacteria(100);Proteobacteria(100);Betaproteobacteria(100);Rhodocyclales(100);Rhodocyclaceae(100);unclassified(100);	0	0	0	0	6.01137e-06	0	9.01705e-06
Otu000915	6	Bacteria(100);unclassified(100);unclassified(100);unclassified(100);unclassified(100);unclassified(100);	0	3.00568e-06	6.01137e-06	0	0	0	0
Otu000916	6	Bacteria(100);Proteobacteria(100);Betaproteobacteria(100);Rhodocyclales(100);Rhodocyclaceae(100);Candidatus_Accumulibacter(100);	0	0	0	3.00568e-06	3.00568e-06	6.01137e-06	0
Otu000917	6	Bacteria(100);Proteobacteria(100);Betaproteobacteria(100);Rhodocyclales(100);Rhodocyclaceae(100);Candidatus_Accumulibacter(67);	0	0	0	3.00568e-06	9.01705e-06	3.00568e-06	0
Otu000918	6	Bacteria(100);Proteobacteria(100);Betaproteobacteria(100);Rhodocyclales(100);Rhodocyclaceae(100);unclassified(100);	9.01705e-06	6.01137e-06	0	0	0	0	0
Otu000919	6	Bacteria(100);Chloroflexi(100);Anaerolineae(100);Anaerolineales(100);Anaerolineaceae(100);unclassified(100);	3.00568e-06	0	0	0	0	3.00568e-06	0
Otu000920	6	Bacteria(100);Proteobacteria(100);Betaproteobacteria(100);Rhodocyclales(100);Rhodocyclaceae(100);unclassified(67);	0	3.00568e-06	3.00568e-06	0	0	0	9.01705e-06
Otu000921	6	Bacteria(100);Proteobacteria(100);Betaproteobacteria(100);Rhodocyclales(100);Rhodocyclaceae(100);unclassified(67);	0	0	3.00568e-06	3.00568e-06	0	6.01137e-06	9.01705e-06
Otu000922	6	Bacteria(100);Proteobacteria(100);Betaproteobacteria(100);Rhodocyclales(100);Rhodocyclaceae(100);Candidatus_Accumulibacter(100);	0	0	9.01705e-06	6.01137e-06	0	0	0
Otu000923	6	Bacteria(100);Proteobacteria(100);Betaproteobacteria(100);Rhodocyclales(100);Rhodocyclaceae(100);unclassified(100);	3.00568e-06	3.00568e-06	3.00568e-06	0	3.00568e-06	0	0
Otu000924	6	Bacteria(100);Proteobacteria(100);Betaproteobacteria(100);Rhodocyclales(100);Rhodocyclaceae(100);unclassified(100);	0	3.00568e-06	1.20227e-05	0	0	3.00568e-06	0
Otu000925	6	Bacteria(100);Proteobacteria(100);Alphaproteobacteria(100);DB1-14(100);unclassified(100);unclassified(100);	1.50284e-05	0	0	0	0	0	0
Otu000926	5	Bacteria(100);Bacteroidetes(100);Sphingobacteriia(100);Sphingobacteriales(100);Chitinophagaceae(100);Ferruginibacter(100);	0	0	0	0	6.01137e-06	3.00568e-06	0
Otu000927	5	Bacteria(100);Bacteroidetes(100);Sphingobacteriia(100);Sphingobacteriales(100);Chitinophagaceae(100);Terrimonas(100);	1.50284e-05	0	0	0	0	0	0
Otu000928	5	Bacteria(100);unclassified(100);unclassified(100);unclassified(100);unclassified(100);unclassified(100);	0	3.00568e-06	3.00568e-06	3.00568e-06	6.01137e-06	0	0
Otu000929	5	Bacteria(100);Bacteroidetes(100);Sphingobacteriia(100);Sphingobacteriales(100);Chitinophagaceae(80);unclassified(80);	3.00568e-06	3.00568e-06	3.00568e-06	3.00568e-06	0	0	0
Otu000930	5	Bacteria(100);unclassified(100);unclassified(100);unclassified(100);unclassified(100);unclassified(100);	0	0	0	3.00568e-06	0	3.00568e-06	9.01705e-06
Otu000931	5	Bacteria(100);Proteobacteria(100);Betaproteobacteria(100);unclassified(100);unclassified(100);unclassified(100);	0	6.01137e-06	3.00568e-06	3.00568e-06	0	0	0
Otu000932	5	Bacteria(100);unclassified(100);unclassified(100);unclassified(100);unclassified(100);unclassified(100);	9.01705e-06	3.00568e-06	0	0	0	0	0
Otu000933	5	Bacteria(100);Proteobacteria(100);unclassified(100);unclassified(100);unclassified(100);unclassified(100);	6.01137e-06	3.00568e-06	6.01137e-06	0	0	0	0
Otu000934	5	Bacteria(100);unclassified(100);unclassified(100);unclassified(100);unclassified(100);unclassified(100);	0	0	0	3.00568e-06	0	9.01705e-06	0
Otu000935	5	Bacteria(100);unclassified(100);unclassified(100);unclassified(100);unclassified(100);unclassified(100);	3.00568e-06	0	0	3.00568e-06	0	0	9.01705e-06
Otu000936	5	Bacteria(100);unclassified(100);unclassified(100);unclassified(100);unclassified(100);unclassified(100);	0	0	6.01137e-06	0	0	3.00568e-06	0
Otu000937	5	Bacteria(100);Proteobacteria(100);Betaproteobacteria(100);unclassified(100);unclassified(100);unclassified(100);	0	0	0	0	9.01705e-06	3.00568e-06	0
Otu000938	5	Bacteria(100);Proteobacteria(100);Betaproteobacteria(100);unclassified(100);unclassified(100);unclassified(100);	0	0	0	0	0	9.01705e-06	1.80341e-05
Otu000939	5	Bacteria(100);Proteobacteria(100);Betaproteobacteria(100);unclassified(100);unclassified(100);unclassified(100);	6.01137e-06	3.00568e-06	0	6.01137e-06	0	0	0
Otu000940	5	Bacteria(100);Proteobacteria(100);Betaproteobacteria(100);unclassified(100);unclassified(100);unclassified(100);	0	0	9.01705e-06	0	6.01137e-06	0	0
Otu000941	5	Bacteria(100);Cyanobacteria(100);Melainabacteria(100);Obscuribacterales(100);unclassified(100);unclassified(100);	0	0	0	0	6.01137e-06	3.00568e-06	0
Otu000942	5	Bacteria(100);Proteobacteria(100);Betaproteobacteria(100);unclassified(100);unclassified(100);unclassified(100);	0	0	0	3.00568e-06	0	9.01705e-06	0
Otu000943	5	Bacteria(100);Bacteroidetes(100);Sphingobacteriia(100);Sphingobacteriales(100);Saprospiraceae(100);unclassified(100);	0	0	0	3.00568e-06	0	3.00568e-06	9.01705e-06
Otu000944	5	Bacteria(100);Proteobacteria(100);Betaproteobacteria(100);Rhodocyclales(100);Rhodocyclaceae(100);Candidatus_Accumulibacter(100);	6.01137e-06	3.00568e-06	0	3.00568e-06	0	0	0
Otu000945	5	Bacteria(100);Bacteroidetes(100);WCHB1-32(100);unclassified(100);unclassified(100);unclassified(100);	1.20227e-05	0	0	0	0	0	0
Otu000946	5	Bacteria(100);Bacteroidetes(100);Bacteroidia(100);Bacteroidales(100);Rikenellaceae(100);Blvii28_wastewater-sludge_group(100);	9.01705e-06	0	0	0	0	0	0
Otu000947	5	Bacteria(100);Proteobacteria(100);Betaproteobacteria(100);Rhodocyclales(100);Rhodocyclaceae(100);unclassified(100);	0	0	0	6.01137e-06	3.00568e-06	0	0
Otu000948	5	Bacteria(100);Proteobacteria(100);Betaproteobacteria(100);Rhodocyclales(100);Rhodocyclaceae(100);unclassified(100);	9.01705e-06	0	6.01137e-06	0	0	0	0
Otu000949	5	Bacteria(100);Cyanobacteria(100);Cyanobacteria(100);SubsectionIII(100);FamilyI(100);Leptolyngbya(80);	0	3.00568e-06	0	0	0	0	9.01705e-06
Otu000950	5	Bacteria(100);Bacteroidetes(100);Cytophagia(100);Cytophagales(100);unclassified(100);unclassified(100);	9.01705e-06	0	0	0	0	0	0
Otu000951	5	Bacteria(100);Planctomycetes(100);Phycisphaerae(100);Phycisphaerales(100);Phycisphaeraceae(100);SM1A02(100);	9.01705e-06	0	3.00568e-06	0	0	3.00568e-06	0
Otu000952	5	Bacteria(100);Chloroflexi(100);Chloroflexia(100);Chloroflexales(100);Chloroflexaceae(100);Chloronema(100);	0	0	3.00568e-06	0	0	0	0
Otu000953	5	Bacteria(100);Actinobacteria(100);Actinobacteria(100);Propionibacteriales(100);Propionibacteriaceae(100);Propionibacterium(100);	0	0	9.01705e-06	3.00568e-06	0	0	0
Otu000954	5	Bacteria(100);Proteobacteria(100);unclassified(100);unclassified(100);unclassified(100);unclassified(100);	0	0	3.00568e-06	6.01137e-06	6.01137e-06	0	0
Otu000955	5	Bacteria(100);unclassified(100);unclassified(100);unclassified(100);unclassified(100);unclassified(100);	0	0	3.00568e-06	3.00568e-06	0	3.00568e-06	0
Otu000956	5	Bacteria(100);Proteobacteria(100);Betaproteobacteria(100);Rhodocyclales(100);Rhodocyclaceae(100);Candidatus_Accumulibacter(61);	3.00568e-06	3.00568e-06	6.01137e-06	0	0	0	0
Otu000957	5	Bacteria(100);Proteobacteria(100);Alphaproteobacteria(100);Caulobacterales(100);Hyphomonadaceae(100);Woodsholea(100);	3.00568e-06	0	3.00568e-06	3.00568e-06	3.00568e-06	0	0
Otu000958	5	Bacteria(100);Proteobacteria(100);Betaproteobacteria(100);Rhodocyclales(100);Rhodocyclaceae(100);Candidatus_Accumulibacter(100);	0	0	6.01137e-06	3.00568e-06	3.00568e-06	0	0
Otu000959	5	Bacteria(100);Bacteroidetes(100);Bacteroidia(100);Bacteroidales(100);Porphyromonadaceae(100);Dysgonomonas(100);	9.01705e-06	0	0	0	0	0	0
Otu000960	5	Bacteria(100);unclassified(100);unclassified(100);unclassified(100);unclassified(100);unclassified(100);	6.01137e-06	0	6.01137e-06	0	3.00568e-06	0	0
Otu000961	5	Bacteria(100);Bacteroidetes(100);Bacteroidia(100);Bacteroidales(100);Porphyromonadaceae(100);Dysgonomonas(100);	9.01705e-06	0	0	0	0	0	0
Otu000962	5	Bacteria(100);Proteobacteria(100);Alphaproteobacteria(100);Rhodobacterales(100);Rhodobacteraceae(100);Defluviimonas(80);	6.01137e-06	3.00568e-06	0	0	3.00568e-06	0	0
Otu000963	5	Bacteria(100);Proteobacteria(100);Betaproteobacteria(100);unclassified(100);unclassified(100);unclassified(100);	0	0	0	0	3.00568e-06	6.01137e-06	0
Otu000964	5	Bacteria(100);Bacteroidetes(100);Sphingobacteriia(100);Sphingobacteriales(100);Saprospiraceae(100);unclassified(100);	0	0	6.01137e-06	3.00568e-06	0	0	0
Otu000965	5	Bacteria(100);Bacteroidetes(100);Sphingobacteriia(100);Sphingobacteriales(100);Chitinophagaceae(100);unclassified(100);	0	0	0	0	0	6.01137e-06	0
Otu000966	5	Bacteria(100);Bacteroidetes(100);Sphingobacteriia(100);Sphingobacteriales(100);Chitinophagaceae(100);Sediminibacterium(100);	0	3.00568e-06	3.00568e-06	3.00568e-06	0	0	0
Otu000967	5	Bacteria(100);Bacteroidetes(100);Sphingobacteriia(100);Sphingobacteriales(100);Chitinophagaceae(100);Sediminibacterium(100);	3.00568e-06	0	0	3.00568e-06	3.00568e-06	3.00568e-06	9.01705e-06
Otu000968	5	Bacteria(100);Bacteroidetes(100);Sphingobacteriia(100);Sphingobacteriales(100);env.OPS_17(100);unclassified(100);	0	0	0	3.00568e-06	3.00568e-06	0	0
Otu000969	5	Bacteria(100);Proteobacteria(100);Betaproteobacteria(100);unclassified(100);unclassified(100);unclassified(100);	3.00568e-06	3.00568e-06	0	0	6.01137e-06	0	0
Otu000970	5	Bacteria(100);Proteobacteria(100);Betaproteobacteria(100);unclassified(100);unclassified(100);unclassified(100);	3.00568e-06	3.00568e-06	0	3.00568e-06	0	0	0
Otu000971	5	Bacteria(100);Bacteroidetes(100);Sphingobacteriia(100);Sphingobacteriales(100);Saprospiraceae(100);unclassified(100);	0	0	0	6.01137e-06	0	0	0
Otu000972	5	Bacteria(100);Proteobacteria(100);Betaproteobacteria(100);Rhodocyclales(100);Rhodocyclaceae(100);unclassified(100);	3.00568e-06	6.01137e-06	0	3.00568e-06	0	0	0
Otu000973	5	Bacteria(100);unclassified(100);unclassified(100);unclassified(100);unclassified(100);unclassified(100);	0	0	0	0	3.00568e-06	3.00568e-06	0
Otu000974	5	Bacteria(100);unclassified(100);unclassified(100);unclassified(100);unclassified(100);unclassified(100);	0	6.01137e-06	3.00568e-06	0	0	0	0
Otu000975	5	Bacteria(100);Chlorobi(100);Chlorobia(100);Chlorobiales(100);SJA-28(100);unclassified(100);	0	3.00568e-06	0	0	3.00568e-06	3.00568e-06	0
Otu000976	5	Bacteria(100);Bacteroidetes(100);Sphingobacteriia(100);Sphingobacteriales(100);unclassified(61);unclassified(61);	0	0	6.01137e-06	3.00568e-06	0	0	1.80341e-05
Otu000977	5	Bacteria(100);Chlorobi(100);Chlorobia(100);Chlorobiales(100);SJA-28(100);unclassified(100);	0	0	0	0	9.01705e-06	3.00568e-06	0
Otu000978	5	Bacteria(100);Bacteroidetes(100);Sphingobacteriia(100);Sphingobacteriales(100);NS11-12_marine_group(100);unclassified(100);	0	0	0	0	0	0	2.70512e-05
Otu000979	5	Bacteria(100);Proteobacteria(100);Deltaproteobacteria(100);Bdellovibrionales(100);Bdellovibrionaceae(100);Bdellovibrio(100);	0	0	0	6.01137e-06	0	0	1.80341e-05
Otu000980	5	Bacteria(100);Bacteroidetes(100);Flavobacteriia(100);Flavobacteriales(100);Flavobacteriaceae(100);Flavobacterium(100);	6.01137e-06	6.01137e-06	0	0	0	0	0
Otu000981	5	Bacteria(100);Chlorobi(100);Chlorobia(100);Chlorobiales(100);SJA-28(100);unclassified(100);	0	0	0	0	0	1.20227e-05	0
Otu000982	5	Bacteria(100);Bacteroidetes(100);Flavobacteriia(100);Flavobacteriales(100);Flavobacteriaceae(100);Flavobacterium(100);	9.01705e-06	3.00568e-06	0	0	0	0	0
Otu000983	5	Bacteria(100);Bacteroidetes(100);Flavobacteriia(100);Flavobacteriales(100);Flavobacteriaceae(100);Flavobacterium(100);	1.20227e-05	3.00568e-06	0	0	0	0	0
Otu000984	5	Bacteria(100);Proteobacteria(100);Deltaproteobacteria(100);unclassified(100);unclassified(100);unclassified(100);	1.20227e-05	0	0	0	0	0	0
Otu000985	5	Bacteria(100);Bacteroidetes(100);unclassified(100);unclassified(100);unclassified(100);unclassified(100);	0	0	3.00568e-06	9.01705e-06	3.00568e-06	0	0
Otu000986	5	Bacteria(100);Bacteroidetes(100);Flavobacteriia(100);Flavobacteriales(100);Flavobacteriaceae(100);Cruoricaptor(100);	9.01705e-06	0	0	0	3.00568e-06	0	0
Otu000987	5	Bacteria(100);Proteobacteria(100);Betaproteobacteria(100);Burkholderiales(100);Comamonadaceae(100);Hydrogenophaga(80);	6.01137e-06	3.00568e-06	3.00568e-06	0	0	0	0
Otu000988	5	Bacteria(100);Proteobacteria(100);Betaproteobacteria(100);Rhodocyclales(100);Rhodocyclaceae(100);Candidatus_Accumulibacter(100);	3.00568e-06	0	0	3.00568e-06	6.01137e-06	0	0
Otu000989	5	Bacteria(100);Proteobacteria(100);Betaproteobacteria(100);Rhodocyclales(100);Rhodocyclaceae(100);Candidatus_Accumulibacter(100);	0	0	3.00568e-06	3.00568e-06	0	3.00568e-06	0
Otu000990	5	Bacteria(100);Proteobacteria(100);Betaproteobacteria(100);Rhodocyclales(100);Rhodocyclaceae(100);Candidatus_Accumulibacter(61);	0	3.00568e-06	0	0	3.00568e-06	3.00568e-06	0
Otu000991	5	Bacteria(100);Proteobacteria(100);Betaproteobacteria(100);Rhodocyclales(100);Rhodocyclaceae(100);Zoogloea(100);	0	3.00568e-06	3.00568e-06	6.01137e-06	0	0	0
Otu000992	5	Bacteria(100);Chlorobi(100);Ignavibacteria(100);Ignavibacteriales(100);Ignavibacteriaceae(100);Ignavibacterium(100);	0	6.01137e-06	3.00568e-06	6.01137e-06	0	0	0
Otu000993	5	Bacteria(100);Actinobacteria(100);Actinobacteria(100);Corynebacteriales(100);Mycobacteriaceae(100);Mycobacterium(100);	6.01137e-06	0	0	0	0	0	0
Otu000994	5	Bacteria(100);Actinobacteria(100);Actinobacteria(100);Micrococcales(100);Micrococcaceae(100);Micrococcus(100);	0	0	0	3.00568e-06	9.01705e-06	0	0
Otu000995	5	Bacteria(100);Proteobacteria(100);Betaproteobacteria(100);Burkholderiales(100);Comamonadaceae(100);unclassified(100);	6.01137e-06	0	3.00568e-06	0	0	0	0
Otu000996	5	Bacteria(100);Firmicutes(100);Clostridia(100);Clostridiales(100);Family_XIII(100);Anaerovorax(100);	1.50284e-05	0	0	0	0	0	0
Otu000997	5	Bacteria(100);Chloroflexi(100);Anaerolineae(100);Anaerolineales(100);Anaerolineaceae(100);unclassified(100);	1.50284e-05	0	0	0	0	0	0
Otu000998	5	Bacteria(100);Proteobacteria(100);Alphaproteobacteria(100);unclassified(100);unclassified(100);unclassified(100);	0	0	0	9.01705e-06	3.00568e-06	0	0
Otu000999	5	Bacteria(100);Candidate_division_TM7(100);unclassified(100);unclassified(100);unclassified(100);unclassified(100);	6.01137e-06	0	0	3.00568e-06	0	0	0
Otu001000	5	Bacteria(100);Proteobacteria(100);Deltaproteobacteria(100);Bdellovibrionales(100);Bdellovibrionaceae(100);Bdellovibrio(100);	0	0	0	9.01705e-06	3.00568e-06	0	0
Otu001001	5	Bacteria(100);Proteobacteria(100);Betaproteobacteria(100);Rhodocyclales(100);Rhodocyclaceae(100);Candidatus_Accumulibacter(100);	3.00568e-06	6.01137e-06	0	0	0	0	0
Otu001002	5	Bacteria(100);Proteobacteria(100);Alphaproteobacteria(100);Rhodospirillales(100);Acetobacteraceae(100);Roseomonas(100);	6.01137e-06	3.00568e-06	0	0	0	3.00568e-06	0
Otu001003	5	Bacteria(100);Proteobacteria(100);Alphaproteobacteria(100);Rhodospirillales(100);MNC12(100);unclassified(100);	9.01705e-06	6.01137e-06	0	0	0	0	0
Otu001004	5	Bacteria(100);Proteobacteria(100);Gammaproteobacteria(100);Acidithiobacillales(100);KCM-B-112(100);unclassified(100);	3.00568e-06	0	9.01705e-06	0	0	3.00568e-06	0
Otu001005	5	Bacteria(100);Proteobacteria(100);Deltaproteobacteria(100);Bdellovibrionales(100);Bdellovibrionaceae(100);Bdellovibrio(100);	1.20227e-05	0	0	0	0	0	0
Otu001006	5	Bacteria(100);Chlorobi(100);Chlorobia(100);Chlorobiales(100);SJA-28(100);unclassified(100);	0	3.00568e-06	0	3.00568e-06	0	6.01137e-06	0
Otu001007	5	Bacteria(100);Chlorobi(100);Chlorobia(100);Chlorobiales(100);SJA-28(100);unclassified(100);	0	0	0	0	0	3.00568e-06	0
Otu001008	5	Bacteria(100);Proteobacteria(100);Gammaproteobacteria(100);Pseudomonadales(100);Pseudomonadaceae(100);Pseudomonas(100);	3.00568e-06	0	0	0	1.20227e-05	0	0
Otu001009	5	Bacteria(100);Chlorobi(100);Chlorobia(100);Chlorobiales(100);SJA-28(100);unclassified(100);	0	0	0	0	6.01137e-06	6.01137e-06	0
Otu001010	5	Bacteria(100);Bacteroidetes(100);Sphingobacteriia(100);Sphingobacteriales(100);Chitinophagaceae(100);Filimonas(100);	1.50284e-05	0	0	0	0	0	0
Otu001011	5	Bacteria(100);Proteobacteria(100);Betaproteobacteria(100);Rhodocyclales(100);Rhodocyclaceae(100);unclassified(100);	0	3.00568e-06	0	0	0	9.01705e-06	0
Otu001012	5	Bacteria(100);Proteobacteria(100);Betaproteobacteria(100);Burkholderiales(100);Comamonadaceae(100);Inhella(61);	0	0	0	3.00568e-06	0	6.01137e-06	1.80341e-05
Otu001013	5	Bacteria(100);Proteobacteria(100);Betaproteobacteria(100);Burkholderiales(100);Comamonadaceae(100);unclassified(100);	3.00568e-06	0	6.01137e-06	0	0	0	0
Otu001014	5	Bacteria(100);Proteobacteria(100);Alphaproteobacteria(100);Rhizobiales(100);DUNssu371(100);unclassified(100);	0	0	0	3.00568e-06	0	3.00568e-06	0
Otu001015	5	Bacteria(100);Bacteroidetes(100);Flavobacteriia(100);Flavobacteriales(100);Flavobacteriaceae(100);Myroides(100);	1.20227e-05	0	0	0	0	0	0
Otu001016	5	Bacteria(100);Proteobacteria(100);Alphaproteobacteria(100);Rickettsiales(100);unclassified(100);unclassified(100);	6.01137e-06	9.01705e-06	0	0	0	0	0
Otu001017	5	Bacteria(100);Proteobacteria(100);Gammaproteobacteria(100);NKB5(100);unclassified(100);unclassified(100);	6.01137e-06	3.00568e-06	0	0	3.00568e-06	0	0
Otu001018	5	Bacteria(100);Proteobacteria(100);Betaproteobacteria(100);Rhodocyclales(100);Rhodocyclaceae(100);unclassified(100);	3.00568e-06	9.01705e-06	3.00568e-06	0	0	0	0
Otu001019	5	Bacteria(100);Bacteroidetes(100);Sphingobacteriia(100);Sphingobacteriales(100);Saprospiraceae(100);unclassified(100);	0	6.01137e-06	0	0	3.00568e-06	0	9.01705e-06
Otu001020	5	Bacteria(100);Proteobacteria(100);Gammaproteobacteria(100);Xanthomonadales(100);Xanthomonadaceae(100);Pseudoxanthomonas(61);	0	0	3.00568e-06	3.00568e-06	0	0	9.01705e-06
Otu001021	5	Bacteria(100);Proteobacteria(100);Gammaproteobacteria(100);Xanthomonadales(100);Xanthomonadaceae(100);unclassified(80);	0	0	0	9.01705e-06	3.00568e-06	0	0
Otu001022	5	Bacteria(100);Proteobacteria(100);Alphaproteobacteria(100);Rhizobiales(100);Xanthobacteraceae(100);Pseudoxanthobacter(100);	3.00568e-06	0	3.00568e-06	0	0	6.01137e-06	0
Otu001023	5	Bacteria(100);Proteobacteria(100);Alphaproteobacteria(100);Rhizobiales(100);Methylobacteriaceae(100);Methylobacterium(100);	6.01137e-06	0	0	3.00568e-06	3.00568e-06	3.00568e-06	0
Otu001024	5	Bacteria(100);Proteobacteria(100);Gammaproteobacteria(100);Xanthomonadales(100);Xanthomonadaceae(100);unclassified(100);	0	0	6.01137e-06	0	0	3.00568e-06	9.01705e-06
Otu001025	5	Bacteria(100);Proteobacteria(100);Gammaproteobacteria(100);Xanthomonadales(100);Xanthomonadaceae(100);Aquimonas(100);	3.00568e-06	0	0	0	0	3.00568e-06	0
Otu001026	5	Bacteria(100);Bacteroidetes(100);Sphingobacteriia(100);Sphingobacteriales(100);Saprospiraceae(80);unclassified(80);	0	0	0	3.00568e-06	3.00568e-06	0	0
Otu001027	5	Bacteria(100);Proteobacteria(100);Betaproteobacteria(100);Rhodocyclales(100);Rhodocyclaceae(100);Candidatus_Accumulibacter(100);	0	3.00568e-06	0	0	0	3.00568e-06	9.01705e-06
Otu001028	5	Bacteria(100);Proteobacteria(100);Betaproteobacteria(100);Rhodocyclales(100);Rhodocyclaceae(100);unclassified(100);	0	3.00568e-06	9.01705e-06	0	0	3.00568e-06	0
Otu001029	5	Bacteria(100);Cyanobacteria(100);Chloroplast(100);unclassified(100);unclassified(100);unclassified(100);	1.50284e-05	0	0	0	0	0	0
Otu001030	5	Bacteria(100);Bacteroidetes(100);Sphingobacteriia(100);Sphingobacteriales(100);Chitinophagaceae(100);Ferruginibacter(100);	0	0	9.01705e-06	0	0	3.00568e-06	9.01705e-06
Otu001031	5	Bacteria(100);Proteobacteria(100);Betaproteobacteria(100);Rhodocyclales(100);Rhodocyclaceae(100);unclassified(100);	0	0	6.01137e-06	6.01137e-06	0	0	0
Otu001032	5	Bacteria(100);Proteobacteria(100);Betaproteobacteria(100);Rhodocyclales(100);Rhodocyclaceae(100);Candidatus_Accumulibacter(100);	0	0	3.00568e-06	0	3.00568e-06	0	0
Otu001033	5	Bacteria(100);Proteobacteria(100);Betaproteobacteria(100);Rhodocyclales(100);Rhodocyclaceae(100);unclassified(80);	0	0	3.00568e-06	0	0	6.01137e-06	9.01705e-06
Otu001034	5	Bacteria(100);Proteobacteria(100);Alphaproteobacteria(100);Rhizobiales(100);Rhizobiales_Incertae_Sedis(100);Rhizomicrobium(100);	0	0	3.00568e-06	3.00568e-06	6.01137e-06	0	0
Otu001035	5	Bacteria(100);Proteobacteria(100);Betaproteobacteria(100);Rhodocyclales(100);Rhodocyclaceae(100);Zoogloea(100);	0	0	6.01137e-06	3.00568e-06	3.00568e-06	0	0
Otu001036	5	Bacteria(100);Proteobacteria(100);Betaproteobacteria(100);Rhodocyclales(100);Rhodocyclaceae(100);unclassified(61);	0	6.01137e-06	0	0	3.00568e-06	0	0
Otu001037	5	Bacteria(100);Verrucomicrobia(100);unclassified(100);unclassified(100);unclassified(100);unclassified(100);	1.20227e-05	0	0	0	0	0	0
Otu001038	5	Bacteria(100);Proteobacteria(100);Betaproteobacteria(100);Rhodocyclales(100);Rhodocyclaceae(100);unclassified(100);	0	0	0	0	0	6.01137e-06	0
Otu001039	5	Bacteria(100);Proteobacteria(100);Betaproteobacteria(100);Rhodocyclales(100);Rhodocyclaceae(100);unclassified(100);	0	0	0	0	6.01137e-06	3.00568e-06	0
Otu001040	5	Bacteria(100);Proteobacteria(100);Betaproteobacteria(100);Rhodocyclales(100);Rhodocyclaceae(100);Candidatus_Accumulibacter(61);	0	3.00568e-06	3.00568e-06	6.01137e-06	0	0	0
Otu001041	5	Bacteria(100);Proteobacteria(100);Betaproteobacteria(100);Rhodocyclales(100);Rhodocyclaceae(100);Candidatus_Accumulibacter(100);	3.00568e-06	0	0	0	3.00568e-06	6.01137e-06	0
Otu001042	4	Bacteria(100);unclassified(100);unclassified(100);unclassified(100);unclassified(100);unclassified(100);	0	3.00568e-06	0	0	3.00568e-06	0	0
Otu001043	4	Bacteria(100);unclassified(100);unclassified(100);unclassified(100);unclassified(100);unclassified(100);	0	0	0	0	0	6.01137e-06	9.01705e-06
Otu001044	4	Bacteria(100);Proteobacteria(100);Betaproteobacteria(100);Rhodocyclales(100);Rhodocyclaceae(100);Candidatus_Accumulibacter(100);	0	3.00568e-06	0	0	0	0	0
Otu001045	4	Bacteria(100);unclassified(100);unclassified(100);unclassified(100);unclassified(100);unclassified(100);	0	0	0	0	3.00568e-06	3.00568e-06	9.01705e-06
Otu001046	4	Bacteria(100);Proteobacteria(100);Betaproteobacteria(100);Rhodocyclales(100);Rhodocyclaceae(100);unclassified(100);	0	0	0	6.01137e-06	0	0	0
Otu001047	4	Bacteria(100);Proteobacteria(100);Betaproteobacteria(100);Rhodocyclales(100);Rhodocyclaceae(100);unclassified(100);	0	0	3.00568e-06	3.00568e-06	0	0	0
Otu001048	4	Bacteria(100);Proteobacteria(100);Betaproteobacteria(100);Rhodocyclales(100);Rhodocyclaceae(100);Candidatus_Accumulibacter(75);	0	3.00568e-06	0	0	3.00568e-06	3.00568e-06	0
Otu001049	4	Bacteria(100);Proteobacteria(100);Betaproteobacteria(100);Rhodocyclales(100);Rhodocyclaceae(100);unclassified(100);	0	0	3.00568e-06	6.01137e-06	0	3.00568e-06	0
Otu001050	4	Bacteria(100);Proteobacteria(100);Betaproteobacteria(100);Rhodocyclales(100);Rhodocyclaceae(100);unclassified(100);	0	0	3.00568e-06	0	3.00568e-06	3.00568e-06	0
Otu001051	4	Bacteria(100);Proteobacteria(100);Betaproteobacteria(100);Rhodocyclales(100);Rhodocyclaceae(100);Dechloromonas(75);	0	0	0	0	0	3.00568e-06	9.01705e-06
Otu001052	4	Bacteria(100);Proteobacteria(100);Betaproteobacteria(100);Rhodocyclales(100);Rhodocyclaceae(100);unclassified(100);	0	3.00568e-06	0	0	0	6.01137e-06	0
Otu001053	4	Bacteria(100);Proteobacteria(100);Betaproteobacteria(100);Rhodocyclales(100);Rhodocyclaceae(100);Candidatus_Accumulibacter(100);	0	0	0	0	0	6.01137e-06	0
Otu001054	4	Bacteria(100);unclassified(100);unclassified(100);unclassified(100);unclassified(100);unclassified(100);	0	0	0	0	6.01137e-06	0	9.01705e-06
Otu001055	4	Bacteria(100);Proteobacteria(100);Deltaproteobacteria(100);unclassified(100);unclassified(100);unclassified(100);	3.00568e-06	0	0	0	0	0	9.01705e-06
Otu001056	4	Bacteria(100);unclassified(100);unclassified(100);unclassified(100);unclassified(100);unclassified(100);	0	0	0	6.01137e-06	0	6.01137e-06	0
Otu001057	4	Bacteria(100);unclassified(100);unclassified(100);unclassified(100);unclassified(100);unclassified(100);	0	0	0	0	6.01137e-06	3.00568e-06	0
Otu001058	4	Bacteria(100);Proteobacteria(100);Deltaproteobacteria(100);Bdellovibrionales(100);Bdellovibrionaceae(100);Bdellovibrio(100);	3.00568e-06	0	0	0	0	0	0
Otu001059	4	Bacteria(100);unclassified(100);unclassified(100);unclassified(100);unclassified(100);unclassified(100);	0	0	0	0	0	6.01137e-06	0
Otu001060	4	Bacteria(100);Cyanobacteria(100);Melainabacteria(100);Vampirovibrionales(100);unclassified(100);unclassified(100);	0	0	3.00568e-06	3.00568e-06	3.00568e-06	0	0
Otu001061	4	Bacteria(100);Proteobacteria(100);Betaproteobacteria(100);Rhodocyclales(100);Rhodocyclaceae(100);unclassified(100);	0	0	0	3.00568e-06	3.00568e-06	3.00568e-06	0
Otu001062	4	Bacteria(100);Proteobacteria(100);Betaproteobacteria(100);Rhodocyclales(100);Rhodocyclaceae(100);unclassified(100);	0	0	3.00568e-06	3.00568e-06	3.00568e-06	0	0
Otu001063	4	Bacteria(100);Proteobacteria(100);Betaproteobacteria(100);Rhodocyclales(100);Rhodocyclaceae(100);unclassified(100);	0	3.00568e-06	0	0	0	3.00568e-06	0
Otu001064	4	Bacteria(100);Proteobacteria(100);Betaproteobacteria(100);Rhodocyclales(100);Rhodocyclaceae(100);unclassified(75);	0	0	6.01137e-06	0	0	3.00568e-06	9.01705e-06
Otu001065	4	Bacteria(100);unclassified(100);unclassified(100);unclassified(100);unclassified(100);unclassified(100);	3.00568e-06	0	0	3.00568e-06	0	3.00568e-06	9.01705e-06
Otu001066	4	Bacteria(100);Proteobacteria(100);Deltaproteobacteria(100);Bdellovibrionales(100);Bdellovibrionaceae(100);Bdellovibrio(100);	0	0	3.00568e-06	3.00568e-06	3.00568e-06	0	0
Otu001067	4	Bacteria(100);unclassified(100);unclassified(100);unclassified(100);unclassified(100);unclassified(100);	3.00568e-06	0	6.01137e-06	0	3.00568e-06	0	0
Otu001068	4	Bacteria(100);Bacteroidetes(100);Cytophagia(100);Cytophagales(100);Cytophagaceae(100);Persicitalea(100);	6.01137e-06	0	0	0	0	0	0
Otu001069	4	Bacteria(100);Proteobacteria(100);Betaproteobacteria(100);Rhodocyclales(100);Rhodocyclaceae(100);unclassified(75);	3.00568e-06	3.00568e-06	0	3.00568e-06	0	0	0
Otu001070	4	Bacteria(100);Proteobacteria(100);Betaproteobacteria(100);Rhodocyclales(100);Rhodocyclaceae(100);Candidatus_Accumulibacter(75);	0	0	0	0	6.01137e-06	0	0
Otu001071	4	Bacteria(100);Proteobacteria(100);Betaproteobacteria(100);Rhodocyclales(100);Rhodocyclaceae(100);unclassified(100);	0	0	3.00568e-06	0	3.00568e-06	6.01137e-06	0
Otu001072	4	Bacteria(100);Proteobacteria(100);Betaproteobacteria(100);Rhodocyclales(100);Rhodocyclaceae(100);unclassified(75);	0	6.01137e-06	0	3.00568e-06	0	0	9.01705e-06
Otu001073	4	Bacteria(100);Proteobacteria(100);Betaproteobacteria(100);Rhodocyclales(100);Rhodocyclaceae(100);unclassified(100);	3.00568e-06	0	0	3.00568e-06	0	3.00568e-06	0
Otu001074	4	Bacteria(100);Proteobacteria(100);Betaproteobacteria(100);Rhodocyclales(100);Rhodocyclaceae(100);unclassified(75);	0	0	6.01137e-06	0	3.00568e-06	0	0
Otu001075	4	Bacteria(100);Proteobacteria(100);Betaproteobacteria(100);Rhodocyclales(100);Rhodocyclaceae(100);unclassified(100);	0	0	3.00568e-06	3.00568e-06	0	3.00568e-06	0
Otu001076	4	Bacteria(100);Proteobacteria(100);Betaproteobacteria(100);Rhodocyclales(100);Rhodocyclaceae(100);Candidatus_Accumulibacter(100);	0	3.00568e-06	3.00568e-06	0	0	0	0
Otu001077	4	Bacteria(100);Proteobacteria(100);Betaproteobacteria(100);Rhodocyclales(100);Rhodocyclaceae(100);unclassified(100);	0	3.00568e-06	3.00568e-06	3.00568e-06	3.00568e-06	0	0
Otu001078	4	Bacteria(100);Proteobacteria(100);Betaproteobacteria(100);Rhodocyclales(100);Rhodocyclaceae(100);unclassified(100);	0	0	0	0	3.00568e-06	3.00568e-06	9.01705e-06
Otu001079	4	Bacteria(100);Bacteroidetes(100);Sphingobacteriia(100);Sphingobacteriales(100);Chitinophagaceae(100);unclassified(100);	0	0	6.01137e-06	3.00568e-06	0	0	9.01705e-06
Otu001080	4	Bacteria(100);Proteobacteria(100);Betaproteobacteria(100);Rhodocyclales(100);Rhodocyclaceae(100);unclassified(100);	0	3.00568e-06	6.01137e-06	0	0	0	0
Otu001081	4	Bacteria(100);Proteobacteria(100);Betaproteobacteria(100);Rhodocyclales(100);Rhodocyclaceae(100);unclassified(100);	6.01137e-06	6.01137e-06	0	0	0	0	0
Otu001082	4	Bacteria(100);Bacteroidetes(100);Sphingobacteriia(100);Sphingobacteriales(100);Saprospiraceae(100);Lewinella(100);	0	3.00568e-06	0	0	0	0	0
Otu001083	4	Bacteria(100);Bacteroidetes(100);Sphingobacteriia(100);Sphingobacteriales(100);Chitinophagaceae(100);Taibaiella(100);	6.01137e-06	3.00568e-06	0	0	0	0	0
Otu001084	4	Bacteria(100);Bacteroidetes(100);Sphingobacteriia(100);Sphingobacteriales(100);Saprospiraceae(100);unclassified(100);	0	0	3.00568e-06	3.00568e-06	0	0	0
Otu001085	4	Bacteria(100);Bacteroidetes(100);Sphingobacteriia(100);Sphingobacteriales(100);Chitinophagaceae(100);unclassified(100);	0	0	6.01137e-06	3.00568e-06	3.00568e-06	0	0
Otu001086	4	Bacteria(100);Bacteroidetes(100);Sphingobacteriia(100);Sphingobacteriales(100);Saprospiraceae(100);Lewinella(100);	0	3.00568e-06	0	0	3.00568e-06	0	0
Otu001087	4	Bacteria(100);Bacteroidetes(100);Sphingobacteriia(100);Sphingobacteriales(100);Chitinophagaceae(100);Sediminibacterium(100);	0	0	6.01137e-06	0	3.00568e-06	3.00568e-06	0
Otu001088	4	Bacteria(100);Bacteroidetes(100);Sphingobacteriia(100);Sphingobacteriales(100);Chitinophagaceae(100);unclassified(100);	3.00568e-06	3.00568e-06	3.00568e-06	3.00568e-06	0	0	0
Otu001089	4	Bacteria(100);Bacteroidetes(100);Sphingobacteriia(100);Sphingobacteriales(100);Saprospiraceae(100);unclassified(100);	0	0	0	0	3.00568e-06	0	0
Otu001090	4	Bacteria(100);Bacteroidetes(100);Sphingobacteriia(100);Sphingobacteriales(100);Chitinophagaceae(100);unclassified(100);	0	0	0	3.00568e-06	0	0	9.01705e-06
Otu001091	4	Bacteria(100);Bacteroidetes(100);Sphingobacteriia(100);Sphingobacteriales(100);Chitinophagaceae(100);Sediminibacterium(100);	0	0	6.01137e-06	0	3.00568e-06	0	0
Otu001092	4	Bacteria(100);Proteobacteria(100);Betaproteobacteria(100);Rhodocyclales(100);Rhodocyclaceae(100);Dechloromonas(75);	0	0	6.01137e-06	3.00568e-06	0	3.00568e-06	0
Otu001093	4	Bacteria(100);Proteobacteria(100);Betaproteobacteria(100);Rhodocyclales(100);Rhodocyclaceae(100);Candidatus_Accumulibacter(75);	6.01137e-06	6.01137e-06	0	0	0	0	0
Otu001094	4	Bacteria(100);Proteobacteria(100);Betaproteobacteria(100);Rhodocyclales(100);Rhodocyclaceae(100);unclassified(75);	0	6.01137e-06	6.01137e-06	0	0	0	0
Otu001095	4	Bacteria(100);Proteobacteria(100);Betaproteobacteria(100);Rhodocyclales(100);Rhodocyclaceae(100);Candidatus_Accumulibacter(100);	0	0	0	0	3.00568e-06	3.00568e-06	0
Otu001096	4	Bacteria(100);Cyanobacteria(100);Chloroplast(100);unclassified(100);unclassified(100);unclassified(100);	0	0	3.00568e-06	6.01137e-06	0	0	0
Otu001097	4	Bacteria(100);Proteobacteria(100);Betaproteobacteria(100);Rhodocyclales(100);Rhodocyclaceae(100);unclassified(75);	0	0	3.00568e-06	3.00568e-06	3.00568e-06	3.00568e-06	0
Otu001098	4	Bacteria(100);Proteobacteria(100);Betaproteobacteria(100);Rhodocyclales(100);Rhodocyclaceae(100);unclassified(100);	0	0	0	3.00568e-06	6.01137e-06	3.00568e-06	0
Otu001099	4	Bacteria(100);Proteobacteria(100);Betaproteobacteria(100);Rhodocyclales(100);Rhodocyclaceae(100);unclassified(100);	0	3.00568e-06	6.01137e-06	0	0	0	0
Otu001100	4	Bacteria(100);Proteobacteria(100);Betaproteobacteria(100);Rhodocyclales(100);Rhodocyclaceae(100);Candidatus_Accumulibacter(100);	0	0	3.00568e-06	3.00568e-06	6.01137e-06	0	0
Otu001101	4	Bacteria(100);Proteobacteria(100);Betaproteobacteria(100);Rhodocyclales(100);Rhodocyclaceae(100);unclassified(100);	0	0	3.00568e-06	3.00568e-06	6.01137e-06	0	0
Otu001102	4	Bacteria(100);Proteobacteria(100);Betaproteobacteria(100);Rhodocyclales(100);Rhodocyclaceae(100);Dechloromonas(75);	0	0	0	3.00568e-06	6.01137e-06	0	0
Otu001103	4	Bacteria(100);Proteobacteria(100);Betaproteobacteria(100);Rhodocyclales(100);Rhodocyclaceae(100);unclassified(100);	3.00568e-06	0	3.00568e-06	3.00568e-06	3.00568e-06	0	0
Otu001104	4	Bacteria(100);Proteobacteria(100);Betaproteobacteria(100);Rhodocyclales(100);Rhodocyclaceae(100);Candidatus_Accumulibacter(100);	0	9.01705e-06	0	3.00568e-06	0	0	0
Otu001105	4	Bacteria(100);Proteobacteria(100);Betaproteobacteria(100);Rhodocyclales(100);Rhodocyclaceae(100);unclassified(75);	0	0	0	0	3.00568e-06	3.00568e-06	0
Otu001106	4	Bacteria(100);Proteobacteria(100);Betaproteobacteria(100);Rhodocyclales(100);Rhodocyclaceae(100);unclassified(100);	0	0	6.01137e-06	0	0	3.00568e-06	0
Otu001107	4	Bacteria(100);Proteobacteria(100);Betaproteobacteria(100);Rhodocyclales(100);Rhodocyclaceae(100);unclassified(100);	0	0	0	1.20227e-05	0	0	0
Otu001108	4	Bacteria(100);Proteobacteria(100);Betaproteobacteria(100);Rhodocyclales(100);Rhodocyclaceae(100);unclassified(100);	0	6.01137e-06	3.00568e-06	3.00568e-06	0	0	0
Otu001109	4	Bacteria(100);Proteobacteria(100);Betaproteobacteria(100);Rhodocyclales(100);Rhodocyclaceae(100);unclassified(100);	0	0	0	3.00568e-06	6.01137e-06	3.00568e-06	0
Otu001110	4	Bacteria(100);Proteobacteria(100);Betaproteobacteria(100);Rhodocyclales(100);Rhodocyclaceae(100);unclassified(100);	0	6.01137e-06	0	0	0	3.00568e-06	9.01705e-06
Otu001111	4	Bacteria(100);Proteobacteria(100);Betaproteobacteria(100);Rhodocyclales(100);Rhodocyclaceae(100);unclassified(100);	0	0	0	0	0	0	9.01705e-06
Otu001112	4	Bacteria(100);Proteobacteria(100);Betaproteobacteria(100);Rhodocyclales(100);Rhodocyclaceae(100);unclassified(100);	0	0	3.00568e-06	0	0	9.01705e-06	0
Otu001113	4	Bacteria(100);Proteobacteria(100);Betaproteobacteria(100);Rhodocyclales(100);Rhodocyclaceae(100);Candidatus_Accumulibacter(75);	0	0	6.01137e-06	0	3.00568e-06	3.00568e-06	0
Otu001114	4	Bacteria(100);Proteobacteria(100);Gammaproteobacteria(100);Xanthomonadales(100);Xanthomonadaceae(100);unclassified(100);	6.01137e-06	0	3.00568e-06	0	0	0	0
Otu001115	4	Bacteria(100);Proteobacteria(100);Gammaproteobacteria(100);Xanthomonadales(100);Xanthomonadaceae(100);unclassified(100);	0	3.00568e-06	0	6.01137e-06	0	0	0
Otu001116	4	Bacteria(100);Spirochaetae(100);Spirochaetes(100);Spirochaetales(100);Spirochaetaceae(100);unclassified(100);	9.01705e-06	0	0	0	0	0	0
Otu001117	4	Bacteria(100);Bacteroidetes(100);Sphingobacteriia(100);Sphingobacteriales(100);Saprospiraceae(100);unclassified(100);	9.01705e-06	0	0	0	0	0	0
Otu001118	4	Bacteria(100);Proteobacteria(100);Gammaproteobacteria(100);Xanthomonadales(100);Xanthomonadaceae(100);unclassified(100);	3.00568e-06	3.00568e-06	3.00568e-06	0	0	0	0
Otu001119	4	Bacteria(100);Proteobacteria(100);Betaproteobacteria(100);Burkholderiales(100);Comamonadaceae(100);Inhella(100);	0	3.00568e-06	0	3.00568e-06	0	0	0
Otu001120	4	Bacteria(100);Bacteroidetes(100);unclassified(100);unclassified(100);unclassified(100);unclassified(100);	0	0	0	0	6.01137e-06	6.01137e-06	0
Otu001121	4	Bacteria(100);Proteobacteria(100);Betaproteobacteria(100);Burkholderiales(100);Comamonadaceae(100);Inhella(75);	0	3.00568e-06	6.01137e-06	0	0	0	0
Otu001122	4	Bacteria(100);Proteobacteria(100);Betaproteobacteria(100);Burkholderiales(100);Comamonadaceae(100);unclassified(100);	0	3.00568e-06	0	3.00568e-06	3.00568e-06	0	0
Otu001123	4	Bacteria(100);Proteobacteria(100);Betaproteobacteria(100);Burkholderiales(100);Comamonadaceae(100);unclassified(100);	0	3.00568e-06	0	0	0	0	0
Otu001124	4	Bacteria(100);Chlorobi(100);Chlorobia(100);Chlorobiales(100);SJA-28(100);unclassified(100);	0	0	0	6.01137e-06	3.00568e-06	3.00568e-06	0
Otu001125	4	Bacteria(100);Proteobacteria(100);Betaproteobacteria(100);Burkholderiales(100);Comamonadaceae(100);Ideonella(100);	0	0	0	3.00568e-06	3.00568e-06	0	9.01705e-06
Otu001126	4	Bacteria(100);Proteobacteria(100);Betaproteobacteria(100);Burkholderiales(100);Comamonadaceae(100);unclassified(100);	0	3.00568e-06	6.01137e-06	0	0	0	0
Otu001127	4	Bacteria(100);Proteobacteria(100);Betaproteobacteria(100);Burkholderiales(100);Comamonadaceae(100);unclassified(100);	0	0	6.01137e-06	6.01137e-06	0	0	0
Otu001128	4	Bacteria(100);Proteobacteria(100);Betaproteobacteria(100);Burkholderiales(100);Comamonadaceae(100);unclassified(100);	0	3.00568e-06	3.00568e-06	3.00568e-06	0	0	0
Otu001129	4	Bacteria(100);Proteobacteria(100);Betaproteobacteria(100);Burkholderiales(100);Comamonadaceae(100);unclassified(100);	0	3.00568e-06	3.00568e-06	0	0	3.00568e-06	0
Otu001130	4	Bacteria(100);Chlorobi(100);Chlorobia(100);Chlorobiales(100);SJA-28(100);unclassified(100);	0	3.00568e-06	0	3.00568e-06	0	3.00568e-06	0
Otu001131	4	Bacteria(100);Actinobacteria(100);Acidimicrobiia(100);Acidimicrobiales(100);Acidimicrobiales_Incertae_Sedis(75);Candidatus_Microthrix(75);	9.01705e-06	0	0	0	0	0	0
Otu001132	4	Bacteria(100);Proteobacteria(100);Alphaproteobacteria(100);Sphingomonadales(100);Sphingomonadaceae(75);unclassified(75);	0	0	3.00568e-06	3.00568e-06	6.01137e-06	0	0
Otu001133	4	Bacteria(100);Bacteroidetes(100);Cytophagia(100);Cytophagales(100);Cytophagaceae(100);unclassified(100);	6.01137e-06	0	0	0	0	0	0
Otu001134	4	Bacteria(100);Actinobacteria(100);Actinobacteria(100);unclassified(100);unclassified(100);unclassified(100);	6.01137e-06	6.01137e-06	0	0	0	0	0
Otu001135	4	Bacteria(100);Chloroflexi(100);Ardenticatenia(100);unclassified(100);unclassified(100);unclassified(100);	3.00568e-06	0	0	0	0	0	0
Otu001136	4	Bacteria(100);Proteobacteria(100);Alphaproteobacteria(100);Caulobacterales(100);Hyphomonadaceae(100);Woodsholea(100);	0	0	0	3.00568e-06	3.00568e-06	0	0
Otu001137	4	Bacteria(100);Proteobacteria(100);Alphaproteobacteria(100);Caulobacterales(100);Caulobacteraceae(100);Brevundimonas(100);	6.01137e-06	0	0	0	3.00568e-06	0	0
Otu001138	4	Bacteria(100);Proteobacteria(100);Alphaproteobacteria(100);Caulobacterales(100);Caulobacteraceae(100);Brevundimonas(100);	3.00568e-06	0	3.00568e-06	0	3.00568e-06	0	0
Otu001139	4	Bacteria(100);Chlamydiae(100);Chlamydiae(100);Chlamydiales(100);Simkaniaceae(100);unclassified(100);	9.01705e-06	0	0	0	0	0	0
Otu001140	4	Bacteria(100);Chlamydiae(100);Chlamydiae(100);Chlamydiales(100);unclassified(100);unclassified(100);	3.00568e-06	0	0	0	0	0	0
Otu001141	4	Bacteria(100);Proteobacteria(100);Gammaproteobacteria(100);unclassified(100);unclassified(100);unclassified(100);	3.00568e-06	6.01137e-06	0	0	0	0	0
Otu001142	4	Bacteria(100);Cyanobacteria(100);Melainabacteria(100);Obscuribacterales(100);unclassified(100);unclassified(100);	0	0	0	0	0	3.00568e-06	0
Otu001143	4	Bacteria(100);Cyanobacteria(100);Melainabacteria(100);Obscuribacterales(100);unclassified(100);unclassified(100);	0	0	0	0	0	0	0
Otu001144	4	Bacteria(100);Proteobacteria(100);Betaproteobacteria(100);unclassified(100);unclassified(100);unclassified(100);	0	0	3.00568e-06	6.01137e-06	3.00568e-06	0	0
Otu001145	4	Bacteria(100);Proteobacteria(100);Betaproteobacteria(100);unclassified(100);unclassified(100);unclassified(100);	0	9.01705e-06	0	0	0	0	0
Otu001146	4	Bacteria(100);Proteobacteria(100);Gammaproteobacteria(100);unclassified(100);unclassified(100);unclassified(100);	0	0	6.01137e-06	3.00568e-06	3.00568e-06	0	0
Otu001147	4	Bacteria(100);Proteobacteria(100);Gammaproteobacteria(100);unclassified(100);unclassified(100);unclassified(100);	0	0	9.01705e-06	0	3.00568e-06	0	0
Otu001148	4	Bacteria(100);Proteobacteria(100);Gammaproteobacteria(100);unclassified(100);unclassified(100);unclassified(100);	0	6.01137e-06	0	0	0	0	9.01705e-06
Otu001149	4	Bacteria(100);Proteobacteria(100);Gammaproteobacteria(100);Xanthomonadales(100);Xanthomonadaceae(100);unclassified(100);	0	3.00568e-06	0	0	0	0	1.80341e-05
Otu001150	4	Bacteria(100);Chloroflexi(100);Anaerolineae(100);Anaerolineales(100);Anaerolineaceae(100);unclassified(100);	0	0	0	0	0	3.00568e-06	0
Otu001151	4	Bacteria(100);Firmicutes(100);Clostridia(100);Clostridiales(100);Family_XIII(100);Incertae_Sedis(100);	9.01705e-06	0	0	0	0	0	0
Otu001152	4	Bacteria(100);Chloroflexi(100);Anaerolineae(100);Anaerolineales(100);Anaerolineaceae(100);unclassified(100);	3.00568e-06	0	0	0	0	3.00568e-06	0
Otu001153	4	Bacteria(100);Proteobacteria(100);Alphaproteobacteria(100);unclassified(100);unclassified(100);unclassified(100);	0	0	1.20227e-05	0	0	0	0
Otu001154	4	Bacteria(100);Chlorobi(100);Ignavibacteria(100);Ignavibacteriales(100);Ignavibacteriaceae(100);Ignavibacterium(100);	0	6.01137e-06	0	3.00568e-06	0	0	0
Otu001155	4	Bacteria(100);Chlorobi(100);Ignavibacteria(100);Ignavibacteriales(100);Ignavibacteriaceae(100);Ignavibacterium(100);	0	3.00568e-06	3.00568e-06	3.00568e-06	0	0	0
Otu001156	4	Bacteria(100);Chlorobi(100);Ignavibacteria(100);Ignavibacteriales(100);Ignavibacteriaceae(100);Ignavibacterium(100);	0	3.00568e-06	3.00568e-06	3.00568e-06	0	0	0
Otu001157	4	Bacteria(100);Bacteroidetes(100);Flavobacteriia(100);Flavobacteriales(100);Cryomorphaceae(100);Fluviicola(100);	3.00568e-06	0	9.01705e-06	0	0	0	0
Otu001158	4	Bacteria(100);Bacteroidetes(100);Flavobacteriia(100);Flavobacteriales(100);Cryomorphaceae(100);Fluviicola(100);	0	0	0	1.20227e-05	0	0	0
Otu001159	4	Bacteria(100);Bacteroidetes(100);Flavobacteriia(100);Flavobacteriales(100);Flavobacteriaceae(100);Flavobacterium(100);	3.00568e-06	0	0	0	0	0	0
Otu001160	4	Bacteria(100);Bacteroidetes(100);Flavobacteriia(100);Flavobacteriales(100);Flavobacteriaceae(100);Flavobacterium(100);	0	0	0	3.00568e-06	3.00568e-06	0	0
Otu001161	4	Bacteria(100);Bacteroidetes(100);Flavobacteriia(100);Flavobacteriales(100);Flavobacteriaceae(100);Flavobacterium(100);	3.00568e-06	0	0	0	0	0	0
Otu001162	4	Bacteria(100);Proteobacteria(100);unclassified(100);unclassified(100);unclassified(100);unclassified(100);	0	0	0	3.00568e-06	0	0	0
Otu001163	4	Bacteria(100);Proteobacteria(100);Alphaproteobacteria(100);Rickettsiales(100);unclassified(100);unclassified(100);	0	6.01137e-06	0	0	0	0	0
Otu001164	4	Bacteria(100);Proteobacteria(100);Alphaproteobacteria(100);Rickettsiales(100);SM2D12(75);unclassified(75);	0	0	0	6.01137e-06	6.01137e-06	0	0
Otu001165	4	Bacteria(100);Proteobacteria(100);Alphaproteobacteria(100);Rhizobiales(100);Brucellaceae(100);Pseudochrobactrum(75);	9.01705e-06	3.00568e-06	0	0	0	0	0
Otu001166	4	Bacteria(100);Bacteroidetes(100);Sphingobacteriia(100);Sphingobacteriales(100);Chitinophagaceae(100);Ferruginibacter(100);	9.01705e-06	0	0	0	0	0	0
Otu001167	4	Bacteria(100);Proteobacteria(100);Alphaproteobacteria(100);Rhizobiales(100);unclassified(100);unclassified(100);	0	0	0	3.00568e-06	0	0	0
Otu001168	4	Bacteria(100);Bacteroidetes(100);unclassified(100);unclassified(100);unclassified(100);unclassified(100);	0	0	0	0	0	6.01137e-06	0
Otu001169	4	Bacteria(100);Actinobacteria(100);Thermoleophilia(100);Solirubrobacterales(100);480-2(100);unclassified(100);	6.01137e-06	0	0	0	0	0	0
Otu001170	4	Bacteria(100);Bacteroidetes(100);unclassified(100);unclassified(100);unclassified(100);unclassified(100);	6.01137e-06	0	0	3.00568e-06	0	0	0
Otu001171	4	Bacteria(100);Bacteroidetes(100);unclassified(100);unclassified(100);unclassified(100);unclassified(100);	0	0	6.01137e-06	0	3.00568e-06	0	0
Otu001172	4	Bacteria(100);Chlorobi(100);Chlorobia(100);Chlorobiales(100);SJA-28(100);unclassified(100);	0	0	0	0	3.00568e-06	9.01705e-06	0
Otu001173	4	Bacteria(100);Chlorobi(100);Chlorobia(100);Chlorobiales(100);SJA-28(100);unclassified(100);	0	0	3.00568e-06	0	3.00568e-06	3.00568e-06	0
Otu001174	4	Bacteria(100);Chlorobi(100);Chlorobia(100);Chlorobiales(100);SJA-28(100);unclassified(100);	0	0	0	3.00568e-06	0	0	0
Otu001175	4	Bacteria(100);Chlorobi(100);Chlorobia(100);Chlorobiales(100);SJA-28(100);unclassified(100);	0	3.00568e-06	0	0	0	6.01137e-06	0
Otu001176	4	Bacteria(100);Chlorobi(100);Chlorobia(100);Chlorobiales(100);SJA-28(100);unclassified(100);	0	0	0	3.00568e-06	6.01137e-06	3.00568e-06	0
Otu001177	4	Bacteria(100);Proteobacteria(100);TA18(100);unclassified(100);unclassified(100);unclassified(100);	0	0	0	0	0	3.00568e-06	1.80341e-05
Otu001178	4	Bacteria(100);Firmicutes(100);Bacilli(100);Lactobacillales(100);Enterococcaceae(100);Vagococcus(100);	9.01705e-06	0	0	0	0	0	0
Otu001179	4	Bacteria(100);Proteobacteria(100);Gammaproteobacteria(100);Xanthomonadales(100);Xanthomonadaceae(100);Lysobacter(75);	0	0	3.00568e-06	0	0	0	0
Otu001180	4	Bacteria(100);unclassified(100);unclassified(100);unclassified(100);unclassified(100);unclassified(100);	0	0	0	6.01137e-06	0	0	9.01705e-06
Otu001181	4	Bacteria(100);Proteobacteria(100);Betaproteobacteria(100);Burkholderiales(100);Comamonadaceae(100);Pseudorhodoferax(100);	0	0	0	6.01137e-06	3.00568e-06	0	0
Otu001182	4	Bacteria(100);Proteobacteria(100);Betaproteobacteria(100);Burkholderiales(100);Comamonadaceae(100);Inhella(100);	0	0	3.00568e-06	6.01137e-06	0	3.00568e-06	0
Otu001183	4	Bacteria(100);Planctomycetes(100);Planctomycetacia(100);Planctomycetales(100);Planctomycetaceae(100);unclassified(100);	0	0	0	0	0	3.00568e-06	0
Otu001184	4	Bacteria(100);Planctomycetes(100);Planctomycetacia(100);Planctomycetales(100);Planctomycetaceae(100);Gemmata(100);	0	3.00568e-06	0	3.00568e-06	3.00568e-06	0	0
Otu001185	4	Bacteria(100);RsaHF231(100);unclassified(100);unclassified(100);unclassified(100);unclassified(100);	9.01705e-06	0	0	0	0	0	0
Otu001186	4	Bacteria(100);Proteobacteria(100);Alphaproteobacteria(100);unclassified(100);unclassified(100);unclassified(100);	0	0	0	9.01705e-06	3.00568e-06	0	0
Otu001187	4	Bacteria(100);Cyanobacteria(100);Cyanobacteria(100);SubsectionIII(100);FamilyI(100);Leptolyngbya(75);	0	0	0	6.01137e-06	3.00568e-06	0	9.01705e-06
Otu001188	4	Bacteria(100);Cyanobacteria(100);Cyanobacteria(100);SubsectionIII(100);FamilyI(100);Leptolyngbya(75);	0	0	0	3.00568e-06	3.00568e-06	0	0
Otu001189	4	Bacteria(100);Cyanobacteria(100);Cyanobacteria(100);SubsectionIII(100);FamilyI(100);unclassified(75);	0	0	0	6.01137e-06	3.00568e-06	0	0
Otu001190	4	Bacteria(100);Proteobacteria(100);Betaproteobacteria(100);unclassified(100);unclassified(100);unclassified(100);	0	1.20227e-05	0	0	0	0	0
Otu001191	4	Bacteria(100);Proteobacteria(100);Betaproteobacteria(100);Rhodocyclales(100);Rhodocyclaceae(100);unclassified(75);	0	0	0	3.00568e-06	0	0	9.01705e-06
Otu001192	4	Bacteria(100);unclassified(100);unclassified(100);unclassified(100);unclassified(100);unclassified(100);	1.20227e-05	0	0	0	0	0	0
Otu001193	4	Bacteria(100);Bacteroidetes(100);Sphingobacteriia(100);Sphingobacteriales(100);Saprospiraceae(100);unclassified(100);	9.01705e-06	0	0	0	0	0	0
Otu001194	4	Bacteria(100);unclassified(100);unclassified(100);unclassified(100);unclassified(100);unclassified(100);	0	0	3.00568e-06	6.01137e-06	3.00568e-06	0	0
Otu001195	4	Bacteria(100);unclassified(100);unclassified(100);unclassified(100);unclassified(100);unclassified(100);	0	0	0	0	6.01137e-06	3.00568e-06	0
Otu001196	4	Bacteria(100);unclassified(100);unclassified(100);unclassified(100);unclassified(100);unclassified(100);	0	0	6.01137e-06	3.00568e-06	0	0	0
Otu001197	4	Bacteria(100);unclassified(100);unclassified(100);unclassified(100);unclassified(100);unclassified(100);	0	0	0	0	0	3.00568e-06	1.80341e-05
Otu001198	4	Bacteria(100);unclassified(100);unclassified(100);unclassified(100);unclassified(100);unclassified(100);	3.00568e-06	6.01137e-06	3.00568e-06	0	0	0	0
Otu001199	4	Bacteria(100);Verrucomicrobia(100);Verrucomicrobiae(100);Verrucomicrobiales(100);Verrucomicrobiaceae(100);Prosthecobacter(100);	3.00568e-06	0	0	0	0	0	0
Otu001200	4	Bacteria(100);unclassified(100);unclassified(100);unclassified(100);unclassified(100);unclassified(100);	0	3.00568e-06	3.00568e-06	0	0	3.00568e-06	0
Otu001201	4	Bacteria(100);unclassified(100);unclassified(100);unclassified(100);unclassified(100);unclassified(100);	9.01705e-06	0	0	0	0	0	0
Otu001202	4	Bacteria(100);Proteobacteria(100);Betaproteobacteria(100);unclassified(100);unclassified(100);unclassified(100);	0	0	0	3.00568e-06	3.00568e-06	3.00568e-06	0
Otu001203	4	Bacteria(100);unclassified(100);unclassified(100);unclassified(100);unclassified(100);unclassified(100);	6.01137e-06	0	3.00568e-06	0	0	0	0
Otu001204	4	Bacteria(100);unclassified(100);unclassified(100);unclassified(100);unclassified(100);unclassified(100);	0	3.00568e-06	0	3.00568e-06	0	0	0
Otu001205	4	Bacteria(100);Proteobacteria(100);Betaproteobacteria(100);unclassified(100);unclassified(100);unclassified(100);	0	0	0	0	3.00568e-06	6.01137e-06	9.01705e-06
Otu001206	4	Bacteria(100);Proteobacteria(100);Betaproteobacteria(100);unclassified(100);unclassified(100);unclassified(100);	0	0	9.01705e-06	0	0	0	0
Otu001207	4	Bacteria(100);Proteobacteria(100);Betaproteobacteria(100);unclassified(100);unclassified(100);unclassified(100);	0	0	0	0	3.00568e-06	0	9.01705e-06
Otu001208	4	Bacteria(100);Proteobacteria(100);Betaproteobacteria(100);unclassified(100);unclassified(100);unclassified(100);	0	0	3.00568e-06	3.00568e-06	0	3.00568e-06	0
Otu001209	4	Bacteria(100);Proteobacteria(100);Betaproteobacteria(100);unclassified(100);unclassified(100);unclassified(100);	0	3.00568e-06	3.00568e-06	3.00568e-06	3.00568e-06	0	0
Otu001210	4	Bacteria(100);Proteobacteria(100);Betaproteobacteria(100);unclassified(100);unclassified(100);unclassified(100);	0	9.01705e-06	0	0	3.00568e-06	0	0
Otu001211	4	Bacteria(100);unclassified(100);unclassified(100);unclassified(100);unclassified(100);unclassified(100);	0	0	3.00568e-06	0	0	3.00568e-06	0
Otu001212	4	Bacteria(100);unclassified(100);unclassified(100);unclassified(100);unclassified(100);unclassified(100);	0	0	0	6.01137e-06	0	0	9.01705e-06
Otu001213	4	Bacteria(100);Proteobacteria(100);Betaproteobacteria(100);unclassified(100);unclassified(100);unclassified(100);	0	6.01137e-06	0	0	3.00568e-06	3.00568e-06	0
Otu001214	4	Bacteria(100);unclassified(100);unclassified(100);unclassified(100);unclassified(100);unclassified(100);	0	6.01137e-06	0	0	0	0	0
Otu001215	4	Bacteria(100);unclassified(100);unclassified(100);unclassified(100);unclassified(100);unclassified(100);	0	0	0	3.00568e-06	3.00568e-06	0	0
Otu001216	4	Bacteria(100);Proteobacteria(100);Betaproteobacteria(100);unclassified(100);unclassified(100);unclassified(100);	6.01137e-06	0	6.01137e-06	0	0	0	0
Otu001217	4	Bacteria(100);unclassified(100);unclassified(100);unclassified(100);unclassified(100);unclassified(100);	3.00568e-06	0	3.00568e-06	6.01137e-06	0	0	0
Otu001218	4	Bacteria(100);unclassified(100);unclassified(100);unclassified(100);unclassified(100);unclassified(100);	0	0	0	0	6.01137e-06	3.00568e-06	0
Otu001219	4	Bacteria(100);Proteobacteria(100);Betaproteobacteria(100);Rhodocyclales(100);Rhodocyclaceae(100);unclassified(100);	0	0	0	6.01137e-06	0	3.00568e-06	0
Otu001220	4	Bacteria(100);Proteobacteria(100);unclassified(100);unclassified(100);unclassified(100);unclassified(100);	0	3.00568e-06	3.00568e-06	3.00568e-06	0	0	0
Otu001221	4	Bacteria(100);Proteobacteria(100);unclassified(100);unclassified(100);unclassified(100);unclassified(100);	3.00568e-06	0	3.00568e-06	3.00568e-06	0	0	0
Otu001222	4	Bacteria(100);Proteobacteria(100);unclassified(100);unclassified(100);unclassified(100);unclassified(100);	0	0	0	0	0	0	9.01705e-06
Otu001223	4	Bacteria(100);Proteobacteria(100);unclassified(100);unclassified(100);unclassified(100);unclassified(100);	3.00568e-06	0	6.01137e-06	0	0	0	0
Otu001224	4	Bacteria(100);Proteobacteria(100);unclassified(100);unclassified(100);unclassified(100);unclassified(100);	9.01705e-06	0	0	0	0	0	0
Otu001225	3	Bacteria(100);Proteobacteria(100);unclassified(100);unclassified(100);unclassified(100);unclassified(100);	0	0	3.00568e-06	3.00568e-06	0	0	0
Otu001226	3	Bacteria(100);Bacteroidetes(100);Flavobacteriia(100);Flavobacteriales(100);Flavobacteriaceae(100);Flavobacterium(67);	3.00568e-06	3.00568e-06	3.00568e-06	0	0	0	0
Otu001227	3	Bacteria(100);unclassified(100);unclassified(100);unclassified(100);unclassified(100);unclassified(100);	3.00568e-06	0	6.01137e-06	0	0	0	0
Otu001228	3	Bacteria(100);unclassified(100);unclassified(100);unclassified(100);unclassified(100);unclassified(100);	0	3.00568e-06	0	3.00568e-06	0	0	0
Otu001229	3	Bacteria(100);Bacteroidetes(100);Flavobacteriia(100);Flavobacteriales(100);Flavobacteriaceae(100);Flavobacterium(100);	0	0	0	6.01137e-06	0	0	0
Otu001230	3	Bacteria(100);Verrucomicrobia(100);Spartobacteria(100);Chthoniobacterales(100);Chthoniobacteraceae(100);Chthoniobacter(100);	3.00568e-06	0	3.00568e-06	3.00568e-06	0	0	0
Otu001231	3	Bacteria(100);unclassified(100);unclassified(100);unclassified(100);unclassified(100);unclassified(100);	0	0	0	0	0	0	1.80341e-05
Otu001232	3	Bacteria(100);unclassified(100);unclassified(100);unclassified(100);unclassified(100);unclassified(100);	6.01137e-06	0	0	3.00568e-06	0	0	0
Otu001233	3	Bacteria(100);unclassified(100);unclassified(100);unclassified(100);unclassified(100);unclassified(100);	0	6.01137e-06	0	0	0	0	0
Otu001234	3	Bacteria(100);Actinobacteria(100);Actinobacteria(100);Corynebacteriales(100);Nocardiaceae(100);Rhodococcus(100);	0	3.00568e-06	0	0	0	0	0
Otu001235	3	Bacteria(100);Chloroflexi(100);Caldilineae(100);Caldilineales(100);Caldilineaceae(100);unclassified(100);	0	6.01137e-06	0	0	3.00568e-06	0	0
Otu001236	3	Bacteria(100);Proteobacteria(100);Betaproteobacteria(100);Burkholderiales(100);Comamonadaceae(100);unclassified(100);	6.01137e-06	3.00568e-06	0	0	0	0	0
Otu001237	3	Bacteria(100);unclassified(100);unclassified(100);unclassified(100);unclassified(100);unclassified(100);	0	0	3.00568e-06	0	0	0	0
Otu001238	3	Bacteria(100);Chloroflexi(100);Caldilineae(100);Caldilineales(100);Caldilineaceae(100);Litorilinea(100);	9.01705e-06	0	0	0	0	0	0
Otu001239	3	Bacteria(100);Proteobacteria(100);Alphaproteobacteria(100);Caulobacterales(100);Caulobacteraceae(100);Brevundimonas(100);	0	0	0	3.00568e-06	6.01137e-06	0	0
Otu001240	3	Bacteria(100);Cyanobacteria(100);Cyanobacteria(100);unclassified(100);unclassified(100);unclassified(100);	0	0	0	0	3.00568e-06	3.00568e-06	0
Otu001241	3	Bacteria(100);unclassified(100);unclassified(100);unclassified(100);unclassified(100);unclassified(100);	0	0	3.00568e-06	6.01137e-06	0	0	0
Otu001242	3	Bacteria(100);Proteobacteria(100);unclassified(100);unclassified(100);unclassified(100);unclassified(100);	0	0	0	0	3.00568e-06	0	0
Otu001243	3	Bacteria(100);unclassified(100);unclassified(100);unclassified(100);unclassified(100);unclassified(100);	0	0	0	3.00568e-06	0	3.00568e-06	9.01705e-06
Otu001244	3	Bacteria(100);unclassified(100);unclassified(100);unclassified(100);unclassified(100);unclassified(100);	0	3.00568e-06	0	3.00568e-06	0	0	0
Otu001245	3	Bacteria(100);unclassified(100);unclassified(100);unclassified(100);unclassified(100);unclassified(100);	0	0	0	0	3.00568e-06	3.00568e-06	0
Otu001246	3	Bacteria(100);Proteobacteria(100);Betaproteobacteria(100);Burkholderiales(100);Comamonadaceae(100);unclassified(100);	0	3.00568e-06	3.00568e-06	0	3.00568e-06	0	0
Otu001247	3	Bacteria(100);Proteobacteria(100);Betaproteobacteria(100);Burkholderiales(100);Comamonadaceae(67);unclassified(67);	0	6.01137e-06	0	0	3.00568e-06	0	0
Otu001248	3	Bacteria(100);Proteobacteria(100);Betaproteobacteria(100);Burkholderiales(100);Comamonadaceae(100);Inhella(67);	0	3.00568e-06	3.00568e-06	0	0	0	9.01705e-06
Otu001249	3	Bacteria(100);unclassified(100);unclassified(100);unclassified(100);unclassified(100);unclassified(100);	0	0	0	0	0	0	1.80341e-05
Otu001250	3	Bacteria(100);Proteobacteria(100);unclassified(100);unclassified(100);unclassified(100);unclassified(100);	3.00568e-06	6.01137e-06	0	0	0	0	0
Otu001251	3	Bacteria(100);unclassified(100);unclassified(100);unclassified(100);unclassified(100);unclassified(100);	0	0	0	3.00568e-06	0	3.00568e-06	0
Otu001252	3	Bacteria(100);unclassified(100);unclassified(100);unclassified(100);unclassified(100);unclassified(100);	0	0	0	6.01137e-06	0	0	0
Otu001253	3	Bacteria(100);unclassified(100);unclassified(100);unclassified(100);unclassified(100);unclassified(100);	0	0	0	3.00568e-06	0	0	0
Otu001254	3	Bacteria(100);Proteobacteria(100);Gammaproteobacteria(100);Xanthomonadales(100);Xanthomonadaceae(100);Pseudoxanthomonas(100);	0	6.01137e-06	0	3.00568e-06	0	0	0
Otu001255	3	Bacteria(100);Proteobacteria(100);unclassified(100);unclassified(100);unclassified(100);unclassified(100);	0	0	0	6.01137e-06	3.00568e-06	0	0
Otu001256	3	Bacteria(100);Proteobacteria(100);Gammaproteobacteria(100);Xanthomonadales(100);Solimonadaceae(100);unclassified(100);	0	0	0	0	0	6.01137e-06	0
Otu001257	3	Bacteria(100);Proteobacteria(100);unclassified(100);unclassified(100);unclassified(100);unclassified(100);	0	0	0	0	0	0	0
Otu001258	3	Bacteria(100);Cyanobacteria(100);ML635J-21(100);unclassified(100);unclassified(100);unclassified(100);	0	0	0	3.00568e-06	6.01137e-06	0	0
Otu001259	3	Bacteria(100);Bacteroidetes(100);Flavobacteriia(100);Flavobacteriales(100);Flavobacteriaceae(100);Flavobacterium(100);	3.00568e-06	0	0	3.00568e-06	0	3.00568e-06	0
Otu001260	3	Bacteria(100);unclassified(100);unclassified(100);unclassified(100);unclassified(100);unclassified(100);	0	0	6.01137e-06	0	0	0	0
Otu001261	3	Bacteria(100);Proteobacteria(100);Deltaproteobacteria(100);Bdellovibrionales(100);Bdellovibrionaceae(100);Bdellovibrio(100);	0	0	3.00568e-06	0	0	0	0
Otu001262	3	Bacteria(100);Bacteroidetes(100);Flavobacteriia(100);Flavobacteriales(100);Flavobacteriaceae(100);Flavobacterium(100);	0	0	0	6.01137e-06	3.00568e-06	0	0
Otu001263	3	Bacteria(100);unclassified(100);unclassified(100);unclassified(100);unclassified(100);unclassified(100);	0	0	0	0	3.00568e-06	0	0
Otu001264	3	Bacteria(100);Bacteroidetes(100);Flavobacteriia(100);Flavobacteriales(100);Flavobacteriaceae(100);unclassified(67);	3.00568e-06	3.00568e-06	0	3.00568e-06	0	0	0
Otu001265	3	Bacteria(100);unclassified(100);unclassified(100);unclassified(100);unclassified(100);unclassified(100);	0	3.00568e-06	3.00568e-06	0	0	0	0
Otu001266	3	Bacteria(100);unclassified(100);unclassified(100);unclassified(100);unclassified(100);unclassified(100);	0	0	3.00568e-06	0	0	0	0
Otu001267	3	Bacteria(100);Bacteroidetes(100);Flavobacteriia(100);Flavobacteriales(100);Flavobacteriaceae(100);unclassified(100);	0	0	0	3.00568e-06	3.00568e-06	0	9.01705e-06
Otu001268	3	Bacteria(100);Bacteroidetes(100);Flavobacteriia(100);Flavobacteriales(100);Flavobacteriaceae(100);unclassified(67);	0	3.00568e-06	0	3.00568e-06	3.00568e-06	0	0
Otu001269	3	Bacteria(100);unclassified(100);unclassified(100);unclassified(100);unclassified(100);unclassified(100);	0	0	0	3.00568e-06	0	6.01137e-06	0
Otu001270	3	Bacteria(100);Bacteroidetes(100);Flavobacteriia(100);Flavobacteriales(100);Flavobacteriaceae(100);unclassified(67);	0	0	3.00568e-06	6.01137e-06	0	0	0
Otu001271	3	Bacteria(100);unclassified(100);unclassified(100);unclassified(100);unclassified(100);unclassified(100);	3.00568e-06	0	3.00568e-06	0	0	0	0
Otu001272	3	Bacteria(100);unclassified(100);unclassified(100);unclassified(100);unclassified(100);unclassified(100);	0	0	0	6.01137e-06	0	0	9.01705e-06
Otu001273	3	Bacteria(100);Proteobacteria(100);Gammaproteobacteria(100);Xanthomonadales(100);Xanthomonadaceae(100);unclassified(100);	3.00568e-06	0	0	0	0	3.00568e-06	0
Otu001274	3	Bacteria(100);Proteobacteria(100);Gammaproteobacteria(100);Xanthomonadales(100);Xanthomonadaceae(100);Thermomonas(100);	0	0	0	0	3.00568e-06	3.00568e-06	0
Otu001275	3	Bacteria(100);Proteobacteria(100);Gammaproteobacteria(100);Xanthomonadales(100);Xanthomonadaceae(100);Pseudoxanthomonas(100);	0	0	0	3.00568e-06	3.00568e-06	0	9.01705e-06
Otu001276	3	Bacteria(100);Proteobacteria(100);Gammaproteobacteria(100);Xanthomonadales(100);Xanthomonadaceae(100);Aquimonas(100);	0	0	0	0	0	0	0
Otu001277	3	Bacteria(100);Chlamydiae(100);Chlamydiae(100);Chlamydiales(100);Parachlamydiaceae(100);Candidatus_Protochlamydia(100);	9.01705e-06	0	0	0	0	0	0
Otu001278	3	Bacteria(100);Chlamydiae(100);Chlamydiae(100);Chlamydiales(100);Parachlamydiaceae(100);unclassified(100);	0	9.01705e-06	0	0	0	0	0
Otu001279	3	Bacteria(100);Chlamydiae(100);Chlamydiae(100);Chlamydiales(100);Parachlamydiaceae(100);unclassified(100);	3.00568e-06	0	0	0	0	0	0
Otu001280	3	Bacteria(100);Proteobacteria(100);unclassified(100);unclassified(100);unclassified(100);unclassified(100);	0	0	3.00568e-06	6.01137e-06	0	0	0
Otu001281	3	Bacteria(100);unclassified(100);unclassified(100);unclassified(100);unclassified(100);unclassified(100);	0	0	6.01137e-06	0	0	0	0
Otu001282	3	Bacteria(100);unclassified(100);unclassified(100);unclassified(100);unclassified(100);unclassified(100);	0	0	0	0	0	6.01137e-06	0
Otu001283	3	Bacteria(100);unclassified(100);unclassified(100);unclassified(100);unclassified(100);unclassified(100);	0	3.00568e-06	0	3.00568e-06	0	0	0
Otu001284	3	Bacteria(100);unclassified(100);unclassified(100);unclassified(100);unclassified(100);unclassified(100);	0	3.00568e-06	0	0	0	0	0
Otu001285	3	Bacteria(100);Proteobacteria(100);Gammaproteobacteria(100);Xanthomonadales(100);Xanthomonadaceae(100);unclassified(100);	0	0	3.00568e-06	6.01137e-06	0	0	0
Otu001286	3	Bacteria(100);Proteobacteria(100);unclassified(100);unclassified(100);unclassified(100);unclassified(100);	3.00568e-06	0	3.00568e-06	3.00568e-06	0	0	0
Otu001287	3	Bacteria(100);Proteobacteria(100);unclassified(100);unclassified(100);unclassified(100);unclassified(100);	0	0	6.01137e-06	0	0	0	0
Otu001288	3	Bacteria(100);Proteobacteria(100);Betaproteobacteria(100);Burkholderiales(100);Alcaligenaceae(100);unclassified(100);	0	0	0	0	9.01705e-06	0	0
Otu001289	3	Bacteria(100);Cyanobacteria(100);Cyanobacteria(100);SubsectionIII(100);FamilyI(100);unclassified(100);	0	0	0	0	0	0	9.01705e-06
Otu001290	3	Bacteria(100);Acidobacteria(100);Acidobacteria(100);Subgroup_3(100);Unknown_Family(100);Bryobacter(100);	0	3.00568e-06	0	0	3.00568e-06	0	0
Otu001291	3	Bacteria(100);SHA-109(100);unclassified(100);unclassified(100);unclassified(100);unclassified(100);	0	0	3.00568e-06	0	3.00568e-06	0	0
Otu001292	3	Bacteria(100);Proteobacteria(100);Betaproteobacteria(100);Methylophilales(100);Methylophilaceae(100);Methylophilus(100);	0	0	0	0	0	6.01137e-06	0
Otu001293	3	Bacteria(100);Cyanobacteria(100);Melainabacteria(100);Obscuribacterales(100);unclassified(100);unclassified(100);	0	0	6.01137e-06	0	0	0	0
Otu001294	3	Bacteria(100);unclassified(100);unclassified(100);unclassified(100);unclassified(100);unclassified(100);	0	0	0	0	0	3.00568e-06	0
Otu001295	3	Bacteria(100);Cyanobacteria(100);Cyanobacteria(100);SubsectionIII(100);FamilyI(100);Leptolyngbya(67);	0	0	0	3.00568e-06	0	3.00568e-06	0
Otu001296	3	Bacteria(100);Cyanobacteria(100);Cyanobacteria(100);SubsectionIII(100);FamilyI(100);Leptolyngbya(100);	0	0	0	3.00568e-06	6.01137e-06	0	0
Otu001297	3	Bacteria(100);Cyanobacteria(100);Cyanobacteria(100);SubsectionIII(100);FamilyI(100);unclassified(100);	0	0	0	0	3.00568e-06	3.00568e-06	0
Otu001298	3	Bacteria(100);Cyanobacteria(100);Cyanobacteria(100);SubsectionIII(100);FamilyI(100);unclassified(67);	0	0	0	0	0	3.00568e-06	9.01705e-06
Otu001299	3	Bacteria(100);unclassified(100);unclassified(100);unclassified(100);unclassified(100);unclassified(100);	0	0	0	3.00568e-06	0	3.00568e-06	0
Otu001300	3	Bacteria(100);Proteobacteria(100);Alphaproteobacteria(100);Caulobacterales(100);Hyphomonadaceae(100);Woodsholea(100);	3.00568e-06	0	3.00568e-06	3.00568e-06	0	0	0
Otu001301	3	Bacteria(100);unclassified(100);unclassified(100);unclassified(100);unclassified(100);unclassified(100);	0	0	0	0	6.01137e-06	3.00568e-06	0
Otu001302	3	Bacteria(100);unclassified(100);unclassified(100);unclassified(100);unclassified(100);unclassified(100);	3.00568e-06	0	0	0	3.00568e-06	3.00568e-06	0
Otu001303	3	Bacteria(100);unclassified(100);unclassified(100);unclassified(100);unclassified(100);unclassified(100);	0	0	0	0	3.00568e-06	6.01137e-06	0
Otu001304	3	Bacteria(100);Proteobacteria(100);Betaproteobacteria(100);Burkholderiales(100);Comamonadaceae(100);unclassified(100);	0	0	0	3.00568e-06	6.01137e-06	0	0
Otu001305	3	Bacteria(100);unclassified(100);unclassified(100);unclassified(100);unclassified(100);unclassified(100);	0	0	0	0	0	0	9.01705e-06
Otu001306	3	Bacteria(100);Proteobacteria(100);unclassified(100);unclassified(100);unclassified(100);unclassified(100);	0	0	0	6.01137e-06	0	3.00568e-06	0
Otu001307	3	Bacteria(100);unclassified(100);unclassified(100);unclassified(100);unclassified(100);unclassified(100);	0	0	3.00568e-06	0	3.00568e-06	3.00568e-06	0
Otu001308	3	Bacteria(100);unclassified(100);unclassified(100);unclassified(100);unclassified(100);unclassified(100);	0	0	0	0	0	6.01137e-06	9.01705e-06
Otu001309	3	Bacteria(100);unclassified(100);unclassified(100);unclassified(100);unclassified(100);unclassified(100);	0	0	0	0	3.00568e-06	3.00568e-06	0
Otu001310	3	Bacteria(100);Proteobacteria(100);Betaproteobacteria(100);Burkholderiales(100);Comamonadaceae(100);unclassified(100);	0	6.01137e-06	3.00568e-06	0	0	0	0
Otu001311	3	Bacteria(100);Proteobacteria(100);Betaproteobacteria(100);Burkholderiales(100);Comamonadaceae(100);Inhella(67);	0	0	3.00568e-06	3.00568e-06	0	0	0
Otu001312	3	Bacteria(100);Proteobacteria(100);unclassified(100);unclassified(100);unclassified(100);unclassified(100);	6.01137e-06	0	0	0	0	0	0
Otu001313	3	Bacteria(100);Proteobacteria(100);unclassified(100);unclassified(100);unclassified(100);unclassified(100);	0	3.00568e-06	3.00568e-06	0	3.00568e-06	0	0
Otu001314	3	Bacteria(100);Proteobacteria(100);unclassified(100);unclassified(100);unclassified(100);unclassified(100);	9.01705e-06	0	0	0	0	0	0
Otu001315	3	Bacteria(100);Proteobacteria(100);Gammaproteobacteria(100);Xanthomonadales(100);Xanthomonadaceae(100);unclassified(100);	6.01137e-06	0	0	0	0	0	0
Otu001316	3	Bacteria(100);Proteobacteria(100);Deltaproteobacteria(100);Myxococcales(100);Phaselicystidaceae(100);Phaselicystis(100);	0	0	0	9.01705e-06	0	0	0
Otu001317	3	Bacteria(100);Proteobacteria(100);Deltaproteobacteria(100);Myxococcales(100);Sandaracinaceae(100);Sandaracinus(100);	0	0	0	3.00568e-06	0	0	0
Otu001318	3	Bacteria(100);Actinobacteria(100);Acidimicrobiia(100);Acidimicrobiales(100);Acidimicrobiaceae(100);CL500-29_marine_group(100);	0	0	0	0	0	0	1.80341e-05
Otu001319	3	Bacteria(100);Proteobacteria(100);Gammaproteobacteria(100);Xanthomonadales(100);Xanthomonadaceae(100);unclassified(100);	0	3.00568e-06	3.00568e-06	3.00568e-06	0	0	0
Otu001320	3	Bacteria(100);Proteobacteria(100);Gammaproteobacteria(100);Xanthomonadales(100);Xanthomonadaceae(100);Aquimonas(100);	3.00568e-06	0	3.00568e-06	3.00568e-06	0	0	0
Otu001321	3	Bacteria(100);Bacteroidetes(100);Sphingobacteriia(100);Sphingobacteriales(100);Chitinophagaceae(100);Chitinophaga(100);	0	0	0	6.01137e-06	0	0	9.01705e-06
Otu001322	3	Bacteria(100);Proteobacteria(100);Gammaproteobacteria(100);Xanthomonadales(100);Xanthomonadaceae(100);unclassified(100);	0	3.00568e-06	0	6.01137e-06	0	0	0
Otu001323	3	Bacteria(100);Proteobacteria(100);Gammaproteobacteria(100);Xanthomonadales(100);Xanthomonadaceae(100);Luteimonas(100);	0	0	3.00568e-06	0	0	0	0
Otu001324	3	Bacteria(100);Proteobacteria(100);Gammaproteobacteria(100);Xanthomonadales(100);Xanthomonadaceae(100);unclassified(100);	0	3.00568e-06	3.00568e-06	0	0	0	0
Otu001325	3	Bacteria(100);Proteobacteria(100);unclassified(100);unclassified(100);unclassified(100);unclassified(100);	6.01137e-06	0	0	0	0	0	0
Otu001326	3	Bacteria(100);Proteobacteria(100);Betaproteobacteria(100);Rhodocyclales(100);Rhodocyclaceae(100);Candidatus_Accumulibacter(100);	3.00568e-06	0	3.00568e-06	0	0	0	9.01705e-06
Otu001327	3	Bacteria(100);Proteobacteria(100);Betaproteobacteria(100);Rhodocyclales(100);Rhodocyclaceae(100);Candidatus_Accumulibacter(100);	0	0	3.00568e-06	0	6.01137e-06	0	0
Otu001328	3	Bacteria(100);Proteobacteria(100);Betaproteobacteria(100);Rhodocyclales(100);Rhodocyclaceae(100);unclassified(100);	0	0	0	0	0	3.00568e-06	9.01705e-06
Otu001329	3	Bacteria(100);Proteobacteria(100);Betaproteobacteria(100);Rhodocyclales(100);Rhodocyclaceae(100);Candidatus_Accumulibacter(67);	6.01137e-06	3.00568e-06	0	0	0	0	0
Otu001330	3	Bacteria(100);Proteobacteria(100);Betaproteobacteria(100);Rhodocyclales(100);Rhodocyclaceae(100);unclassified(67);	3.00568e-06	0	3.00568e-06	0	3.00568e-06	0	0
Otu001331	3	Bacteria(100);Proteobacteria(100);Betaproteobacteria(100);Rhodocyclales(100);Rhodocyclaceae(100);unclassified(100);	3.00568e-06	0	0	0	3.00568e-06	3.00568e-06	0
Otu001332	3	Bacteria(100);Proteobacteria(100);Betaproteobacteria(100);Rhodocyclales(100);Rhodocyclaceae(100);Candidatus_Accumulibacter(100);	0	3.00568e-06	0	0	0	3.00568e-06	0
Otu001333	3	Bacteria(100);Proteobacteria(100);Betaproteobacteria(100);Rhodocyclales(100);Rhodocyclaceae(100);unclassified(100);	3.00568e-06	0	0	0	0	3.00568e-06	0
Otu001334	3	Bacteria(100);Proteobacteria(100);Betaproteobacteria(100);Rhodocyclales(100);Rhodocyclaceae(100);unclassified(67);	0	0	0	3.00568e-06	0	0	9.01705e-06
Otu001335	3	Bacteria(100);Proteobacteria(100);Betaproteobacteria(100);Rhodocyclales(100);Rhodocyclaceae(100);unclassified(100);	0	0	3.00568e-06	3.00568e-06	0	3.00568e-06	0
Otu001336	3	Bacteria(100);Proteobacteria(100);Betaproteobacteria(100);Rhodocyclales(100);Rhodocyclaceae(100);Candidatus_Accumulibacter(100);	0	0	0	3.00568e-06	0	0	0
Otu001337	3	Bacteria(100);Proteobacteria(100);Betaproteobacteria(100);Rhodocyclales(100);Rhodocyclaceae(100);unclassified(100);	0	0	0	0	6.01137e-06	0	0
Otu001338	3	Bacteria(100);Proteobacteria(100);Betaproteobacteria(100);Rhodocyclales(100);Rhodocyclaceae(100);Candidatus_Accumulibacter(100);	0	0	6.01137e-06	0	3.00568e-06	0	0
Otu001339	3	Bacteria(100);Proteobacteria(100);Betaproteobacteria(100);Rhodocyclales(100);Rhodocyclaceae(100);unclassified(100);	3.00568e-06	0	0	0	0	0	0
Otu001340	3	Bacteria(100);Proteobacteria(100);Betaproteobacteria(100);Rhodocyclales(100);Rhodocyclaceae(100);unclassified(100);	3.00568e-06	3.00568e-06	3.00568e-06	0	0	0	0
Otu001341	3	Bacteria(100);Proteobacteria(100);Betaproteobacteria(100);Rhodocyclales(100);Rhodocyclaceae(100);unclassified(100);	0	0	0	0	3.00568e-06	0	0
Otu001342	3	Bacteria(100);Proteobacteria(100);Betaproteobacteria(100);Rhodocyclales(100);Rhodocyclaceae(100);unclassified(67);	0	0	3.00568e-06	0	0	0	0
Otu001343	3	Bacteria(100);Proteobacteria(100);Betaproteobacteria(100);Rhodocyclales(100);Rhodocyclaceae(100);unclassified(100);	0	0	0	0	3.00568e-06	0	0
Otu001344	3	Bacteria(100);Proteobacteria(100);Betaproteobacteria(100);Rhodocyclales(100);Rhodocyclaceae(100);unclassified(100);	0	3.00568e-06	0	0	0	3.00568e-06	0
Otu001345	3	Bacteria(100);Proteobacteria(100);Betaproteobacteria(100);Rhodocyclales(100);Rhodocyclaceae(100);unclassified(100);	0	3.00568e-06	0	0	0	0	9.01705e-06
Otu001346	3	Bacteria(100);Proteobacteria(100);Betaproteobacteria(100);Rhodocyclales(100);Rhodocyclaceae(100);Candidatus_Accumulibacter(100);	0	0	0	3.00568e-06	6.01137e-06	0	0
Otu001347	3	Bacteria(100);Proteobacteria(100);Betaproteobacteria(100);Rhodocyclales(100);Rhodocyclaceae(100);unclassified(100);	0	0	3.00568e-06	0	3.00568e-06	0	0
Otu001348	3	Bacteria(100);Proteobacteria(100);Betaproteobacteria(100);Rhodocyclales(100);Rhodocyclaceae(100);unclassified(100);	0	3.00568e-06	0	0	3.00568e-06	3.00568e-06	0
Otu001349	3	Bacteria(100);Proteobacteria(100);Betaproteobacteria(100);Rhodocyclales(100);Rhodocyclaceae(100);unclassified(67);	3.00568e-06	3.00568e-06	0	0	0	3.00568e-06	0
Otu001350	3	Bacteria(100);Proteobacteria(100);Betaproteobacteria(100);Rhodocyclales(100);Rhodocyclaceae(100);Candidatus_Accumulibacter(100);	3.00568e-06	0	0	0	0	0	0
Otu001351	3	Bacteria(100);Proteobacteria(100);Betaproteobacteria(100);Rhodocyclales(100);Rhodocyclaceae(100);unclassified(100);	0	0	0	0	0	6.01137e-06	0
Otu001352	3	Bacteria(100);Proteobacteria(100);Betaproteobacteria(100);Rhodocyclales(100);Rhodocyclaceae(100);unclassified(100);	3.00568e-06	0	0	0	3.00568e-06	0	0
Otu001353	3	Bacteria(100);Proteobacteria(100);Betaproteobacteria(100);Rhodocyclales(100);Rhodocyclaceae(100);unclassified(100);	0	0	3.00568e-06	3.00568e-06	0	0	0
Otu001354	3	Bacteria(100);Proteobacteria(100);Betaproteobacteria(100);Rhodocyclales(100);Rhodocyclaceae(100);Candidatus_Accumulibacter(100);	0	0	3.00568e-06	0	0	6.01137e-06	0
Otu001355	3	Bacteria(100);Proteobacteria(100);Betaproteobacteria(100);Rhodocyclales(100);Rhodocyclaceae(100);Candidatus_Accumulibacter(67);	0	0	3.00568e-06	3.00568e-06	3.00568e-06	0	0
Otu001356	3	Bacteria(100);Verrucomicrobia(100);UA11(100);unclassified(100);unclassified(100);unclassified(100);	3.00568e-06	6.01137e-06	0	0	0	0	0
Otu001357	3	Bacteria(100);Proteobacteria(100);Alphaproteobacteria(100);Sphingomonadales(100);unclassified(100);unclassified(100);	0	0	0	0	6.01137e-06	0	0
Otu001358	3	Bacteria(100);Proteobacteria(100);Betaproteobacteria(100);Rhodocyclales(100);Rhodocyclaceae(100);Candidatus_Accumulibacter(67);	0	0	6.01137e-06	0	3.00568e-06	0	0
Otu001359	3	Bacteria(100);Proteobacteria(100);Betaproteobacteria(100);unclassified(100);unclassified(100);unclassified(100);	0	0	0	0	0	0	0
Otu001360	3	Bacteria(100);Proteobacteria(100);Betaproteobacteria(100);Rhodocyclales(100);Rhodocyclaceae(100);unclassified(100);	0	0	0	0	3.00568e-06	0	9.01705e-06
Otu001361	3	Bacteria(100);Proteobacteria(100);Betaproteobacteria(100);Rhodocyclales(100);Rhodocyclaceae(100);Candidatus_Accumulibacter(67);	0	0	3.00568e-06	0	6.01137e-06	0	0
Otu001362	3	Bacteria(100);Proteobacteria(100);Betaproteobacteria(100);Rhodocyclales(100);Rhodocyclaceae(100);unclassified(100);	0	0	3.00568e-06	0	3.00568e-06	3.00568e-06	0
Otu001363	3	Bacteria(100);Proteobacteria(100);Betaproteobacteria(100);Rhodocyclales(100);Rhodocyclaceae(100);unclassified(100);	3.00568e-06	0	3.00568e-06	3.00568e-06	0	0	0
Otu001364	3	Bacteria(100);Proteobacteria(100);Betaproteobacteria(100);Rhodocyclales(100);Rhodocyclaceae(100);Candidatus_Accumulibacter(100);	0	3.00568e-06	3.00568e-06	0	0	0	0
Otu001365	3	Bacteria(100);Proteobacteria(100);Betaproteobacteria(100);Rhodocyclales(100);Rhodocyclaceae(100);unclassified(67);	3.00568e-06	0	3.00568e-06	0	0	0	0
Otu001366	3	Bacteria(100);Proteobacteria(100);Betaproteobacteria(100);Rhodocyclales(100);Rhodocyclaceae(100);Thauera(100);	0	3.00568e-06	0	0	3.00568e-06	3.00568e-06	0
Otu001367	3	Bacteria(100);Proteobacteria(100);Betaproteobacteria(100);Rhodocyclales(100);Rhodocyclaceae(100);unclassified(100);	0	0	0	0	0	9.01705e-06	0
Otu001368	3	Bacteria(100);Proteobacteria(100);Betaproteobacteria(100);Rhodocyclales(100);Rhodocyclaceae(100);unclassified(67);	0	0	0	0	9.01705e-06	0	0
Otu001369	3	Bacteria(100);Proteobacteria(100);Betaproteobacteria(100);Rhodocyclales(100);Rhodocyclaceae(100);unclassified(100);	0	0	0	3.00568e-06	0	3.00568e-06	0
Otu001370	3	Bacteria(100);Proteobacteria(100);Betaproteobacteria(100);Rhodocyclales(100);Rhodocyclaceae(100);Candidatus_Accumulibacter(100);	0	3.00568e-06	0	3.00568e-06	3.00568e-06	0	0
Otu001371	3	Bacteria(100);Proteobacteria(100);Betaproteobacteria(100);Rhodocyclales(100);Rhodocyclaceae(100);unclassified(100);	0	0	3.00568e-06	3.00568e-06	0	0	0
Otu001372	3	Bacteria(100);Proteobacteria(100);Betaproteobacteria(100);Rhodocyclales(100);Rhodocyclaceae(100);unclassified(100);	0	3.00568e-06	3.00568e-06	0	3.00568e-06	0	0
Otu001373	3	Bacteria(100);Proteobacteria(100);Betaproteobacteria(100);Rhodocyclales(100);Rhodocyclaceae(100);unclassified(67);	0	0	3.00568e-06	6.01137e-06	0	0	0
Otu001374	3	Bacteria(100);Proteobacteria(100);Betaproteobacteria(100);Rhodocyclales(100);Rhodocyclaceae(100);unclassified(67);	0	3.00568e-06	0	3.00568e-06	0	0	9.01705e-06
Otu001375	3	Bacteria(100);Proteobacteria(100);Betaproteobacteria(100);Rhodocyclales(100);Rhodocyclaceae(100);unclassified(67);	0	0	3.00568e-06	0	0	3.00568e-06	9.01705e-06
Otu001376	3	Bacteria(100);Proteobacteria(100);Betaproteobacteria(100);Rhodocyclales(100);Rhodocyclaceae(100);Candidatus_Accumulibacter(100);	0	0	0	0	3.00568e-06	0	0
Otu001377	3	Bacteria(100);Proteobacteria(100);Betaproteobacteria(100);Rhodocyclales(100);Rhodocyclaceae(100);Candidatus_Accumulibacter(67);	0	0	3.00568e-06	0	0	0	0
Otu001378	3	Bacteria(100);Proteobacteria(100);Betaproteobacteria(100);Rhodocyclales(100);Rhodocyclaceae(100);Candidatus_Accumulibacter(100);	6.01137e-06	3.00568e-06	0	0	0	0	0
Otu001379	3	Bacteria(100);Proteobacteria(100);Betaproteobacteria(100);Rhodocyclales(100);Rhodocyclaceae(100);unclassified(67);	0	3.00568e-06	0	0	0	0	9.01705e-06
Otu001380	3	Bacteria(100);Proteobacteria(100);Betaproteobacteria(100);Rhodocyclales(100);Rhodocyclaceae(100);unclassified(100);	6.01137e-06	0	0	0	3.00568e-06	0	0
Otu001381	3	Bacteria(100);Proteobacteria(100);Betaproteobacteria(100);Rhodocyclales(100);Rhodocyclaceae(100);unclassified(100);	0	3.00568e-06	0	0	0	0	9.01705e-06
Otu001382	3	Bacteria(100);Proteobacteria(100);Betaproteobacteria(100);Rhodocyclales(100);Rhodocyclaceae(100);unclassified(100);	0	0	0	0	9.01705e-06	0	0
Otu001383	3	Bacteria(100);Proteobacteria(100);Betaproteobacteria(100);Rhodocyclales(100);Rhodocyclaceae(100);unclassified(100);	0	0	0	0	0	0	0
Otu001384	3	Bacteria(100);Proteobacteria(100);Betaproteobacteria(100);Rhodocyclales(100);Rhodocyclaceae(100);Candidatus_Accumulibacter(67);	6.01137e-06	3.00568e-06	0	0	0	0	0
Otu001385	3	Bacteria(100);Proteobacteria(100);Betaproteobacteria(100);Rhodocyclales(100);Rhodocyclaceae(100);unclassified(67);	0	6.01137e-06	3.00568e-06	0	0	0	0
Otu001386	3	Bacteria(100);Proteobacteria(100);Betaproteobacteria(100);Rhodocyclales(100);Rhodocyclaceae(100);unclassified(100);	0	3.00568e-06	0	3.00568e-06	3.00568e-06	0	0
Otu001387	3	Bacteria(100);Proteobacteria(100);Betaproteobacteria(100);Rhodocyclales(100);Rhodocyclaceae(100);unclassified(100);	0	0	0	0	6.01137e-06	3.00568e-06	0
Otu001388	3	Bacteria(100);Chlorobi(100);Chlorobia(100);Chlorobiales(100);SJA-28(100);unclassified(100);	0	0	0	3.00568e-06	0	0	0
Otu001389	3	Bacteria(100);Proteobacteria(100);Alphaproteobacteria(100);unclassified(100);unclassified(100);unclassified(100);	6.01137e-06	0	3.00568e-06	0	0	0	0
Otu001390	3	Bacteria(100);Chlorobi(100);Ignavibacteria(100);Ignavibacteriales(100);unclassified(67);unclassified(67);	0	0	3.00568e-06	3.00568e-06	0	0	0
Otu001391	3	Bacteria(100);Chlorobi(100);Ignavibacteria(100);Ignavibacteriales(100);Ignavibacteriaceae(100);Ignavibacterium(100);	0	3.00568e-06	0	0	3.00568e-06	0	0
Otu001392	3	Bacteria(100);Chlorobi(100);Ignavibacteria(100);Ignavibacteriales(100);Ignavibacteriaceae(100);Ignavibacterium(100);	0	3.00568e-06	0	6.01137e-06	0	0	0
Otu001393	3	Bacteria(100);Chlorobi(100);Ignavibacteria(100);Ignavibacteriales(100);Ignavibacteriaceae(100);Ignavibacterium(100);	0	0	3.00568e-06	3.00568e-06	0	0	0
Otu001394	3	Bacteria(100);Chlorobi(100);Ignavibacteria(100);Ignavibacteriales(100);Ignavibacteriaceae(100);Ignavibacterium(100);	0	3.00568e-06	0	0	3.00568e-06	3.00568e-06	0
Otu001395	3	Bacteria(100);Proteobacteria(100);Alphaproteobacteria(100);unclassified(100);unclassified(100);unclassified(100);	0	0	0	3.00568e-06	0	0	9.01705e-06
Otu001396	3	Bacteria(100);Chloroflexi(100);Anaerolineae(100);Anaerolineales(100);Anaerolineaceae(100);unclassified(100);	3.00568e-06	0	3.00568e-06	0	0	3.00568e-06	0
Otu001397	3	Bacteria(100);Proteobacteria(100);Betaproteobacteria(100);Rhodocyclales(100);Rhodocyclaceae(100);Candidatus_Accumulibacter(100);	0	0	0	0	6.01137e-06	0	0
Otu001398	3	Bacteria(100);Chlorobi(100);Chlorobia(100);Chlorobiales(100);SJA-28(100);unclassified(100);	0	0	0	0	6.01137e-06	3.00568e-06	0
Otu001399	3	Bacteria(100);Chlorobi(100);Chlorobia(100);Chlorobiales(100);SJA-28(100);unclassified(100);	0	0	0	0	3.00568e-06	3.00568e-06	0
Otu001400	3	Bacteria(100);Chlorobi(100);Chlorobia(100);Chlorobiales(100);SJA-28(100);unclassified(100);	0	0	0	0	9.01705e-06	0	0
Otu001401	3	Bacteria(100);Chlorobi(100);Chlorobia(100);Chlorobiales(100);SJA-28(100);unclassified(100);	0	0	3.00568e-06	0	3.00568e-06	3.00568e-06	0
Otu001402	3	Bacteria(100);Chlorobi(100);Chlorobia(100);Chlorobiales(100);SJA-28(100);unclassified(100);	0	0	0	0	3.00568e-06	3.00568e-06	0
Otu001403	3	Bacteria(100);Chlorobi(100);Chlorobia(100);Chlorobiales(100);SJA-28(100);unclassified(100);	0	0	0	0	3.00568e-06	3.00568e-06	0
Otu001404	3	Bacteria(100);Planctomycetes(100);Planctomycetacia(100);Planctomycetales(100);Planctomycetaceae(100);unclassified(100);	0	0	0	0	0	6.01137e-06	0
Otu001405	3	Bacteria(100);Chlorobi(100);Chlorobia(100);Chlorobiales(100);SJA-28(100);unclassified(100);	0	0	0	0	3.00568e-06	3.00568e-06	9.01705e-06
Otu001406	3	Bacteria(100);Chlorobi(100);Chlorobia(100);Chlorobiales(100);SJA-28(100);unclassified(100);	0	0	0	3.00568e-06	0	0	9.01705e-06
Otu001407	3	Bacteria(100);Chlorobi(100);Chlorobia(100);Chlorobiales(100);SJA-28(100);unclassified(100);	0	0	0	0	3.00568e-06	0	0
Otu001408	3	Bacteria(100);Chlorobi(100);Chlorobia(100);Chlorobiales(100);SJA-28(100);unclassified(100);	0	0	0	0	0	0	9.01705e-06
Otu001409	3	Bacteria(100);Chlorobi(100);Chlorobia(100);Chlorobiales(100);SJA-28(100);unclassified(100);	0	0	0	3.00568e-06	3.00568e-06	3.00568e-06	0
Otu001410	3	Bacteria(100);Planctomycetes(100);Planctomycetacia(100);Planctomycetales(100);Planctomycetaceae(100);Pir4_lineage(100);	3.00568e-06	6.01137e-06	0	0	0	0	0
Otu001411	3	Bacteria(100);Proteobacteria(100);Betaproteobacteria(100);Rhodocyclales(100);Rhodocyclaceae(100);Candidatus_Accumulibacter(67);	9.01705e-06	0	0	0	0	0	0
Otu001412	3	Bacteria(100);Chlorobi(100);Chlorobia(100);Chlorobiales(100);SJA-28(100);unclassified(100);	0	0	0	0	0	6.01137e-06	0
Otu001413	3	Bacteria(100);Chlorobi(100);Chlorobia(100);Chlorobiales(100);SJA-28(100);unclassified(100);	0	0	0	3.00568e-06	3.00568e-06	0	9.01705e-06
Otu001414	3	Bacteria(100);Chlorobi(100);Chlorobia(100);Chlorobiales(100);SJA-28(100);unclassified(100);	0	0	0	0	0	3.00568e-06	0
Otu001415	3	Bacteria(100);Chlorobi(100);Chlorobia(100);Chlorobiales(100);SJA-28(100);unclassified(100);	0	0	0	0	3.00568e-06	3.00568e-06	0
Otu001416	3	Bacteria(100);Bacteroidetes(100);BSV13(100);unclassified(100);unclassified(100);unclassified(100);	9.01705e-06	0	0	0	0	0	0
Otu001417	3	Bacteria(100);Chlorobi(100);Chlorobia(100);Chlorobiales(100);SJA-28(100);unclassified(100);	0	0	0	6.01137e-06	0	0	0
Otu001418	3	Bacteria(100);Chlorobi(100);Chlorobia(100);Chlorobiales(100);SJA-28(100);unclassified(100);	0	0	0	0	0	0	1.80341e-05
Otu001419	3	Bacteria(100);Proteobacteria(100);Betaproteobacteria(100);Rhodocyclales(100);Rhodocyclaceae(100);unclassified(67);	0	0	0	3.00568e-06	0	3.00568e-06	0
Otu001420	3	Bacteria(100);Proteobacteria(100);Betaproteobacteria(100);Rhodocyclales(100);Rhodocyclaceae(100);Candidatus_Accumulibacter(100);	0	0	0	0	6.01137e-06	0	0
Otu001421	3	Bacteria(100);Proteobacteria(100);Betaproteobacteria(100);Rhodocyclales(100);Rhodocyclaceae(100);unclassified(100);	0	9.01705e-06	0	0	0	0	0
Otu001422	3	Bacteria(100);Proteobacteria(100);Betaproteobacteria(100);Rhodocyclales(100);Rhodocyclaceae(100);unclassified(67);	0	0	6.01137e-06	0	0	0	0
Otu001423	3	Bacteria(100);Proteobacteria(100);Betaproteobacteria(100);Rhodocyclales(100);Rhodocyclaceae(100);Candidatus_Accumulibacter(100);	0	3.00568e-06	0	0	0	0	0
Otu001424	3	Bacteria(100);Bacteroidetes(100);unclassified(100);unclassified(100);unclassified(100);unclassified(100);	0	0	0	3.00568e-06	0	0	0
Otu001425	3	Bacteria(100);Bacteroidetes(100);unclassified(100);unclassified(100);unclassified(100);unclassified(100);	0	0	0	0	0	3.00568e-06	9.01705e-06
Otu001426	3	Bacteria(100);Bacteroidetes(100);unclassified(100);unclassified(100);unclassified(100);unclassified(100);	0	0	0	3.00568e-06	0	3.00568e-06	0
Otu001427	3	Bacteria(100);Acidobacteria(100);Acidobacteria(100);Subgroup_4(100);11-24(100);unclassified(100);	0	0	0	0	3.00568e-06	0	0
Otu001428	3	Bacteria(100);Acidobacteria(100);Acidobacteria(100);Subgroup_4(100);11-24(100);unclassified(100);	0	9.01705e-06	0	0	0	0	0
Otu001429	3	Bacteria(100);Bacteroidetes(100);unclassified(100);unclassified(100);unclassified(100);unclassified(100);	0	3.00568e-06	0	0	3.00568e-06	0	0
Otu001430	3	Bacteria(100);Firmicutes(100);Clostridia(100);Clostridiales(100);Family_XI(100);Sedimentibacter(100);	6.01137e-06	0	0	0	0	0	0
Otu001431	3	Bacteria(100);Firmicutes(100);Clostridia(100);Clostridiales(100);P._palm_C-A_51(100);unclassified(100);	9.01705e-06	0	0	0	0	0	0
Otu001432	3	Bacteria(100);Proteobacteria(100);Alphaproteobacteria(100);Rhizobiales(100);Xanthobacteraceae(100);Pseudolabrys(100);	6.01137e-06	0	0	0	0	0	0
Otu001433	3	Bacteria(100);Proteobacteria(100);Alphaproteobacteria(100);Rhizobiales(100);Methylobacteriaceae(100);Meganema(100);	0	0	0	3.00568e-06	3.00568e-06	0	0
Otu001434	3	Bacteria(100);Proteobacteria(100);Alphaproteobacteria(100);Rhizobiales(100);Methylobacteriaceae(100);Meganema(100);	0	0	0	3.00568e-06	0	3.00568e-06	0
Otu001435	3	Bacteria(100);Proteobacteria(100);Alphaproteobacteria(100);Rhizobiales(100);unclassified(100);unclassified(100);	0	0	0	0	3.00568e-06	3.00568e-06	0
Otu001436	3	Bacteria(100);Proteobacteria(100);Alphaproteobacteria(100);Rhizobiales(100);unclassified(100);unclassified(100);	3.00568e-06	3.00568e-06	3.00568e-06	0	0	0	0
Otu001437	3	Bacteria(100);Proteobacteria(100);Alphaproteobacteria(100);Rhizobiales(100);Hyphomicrobiaceae(100);Hyphomicrobium(100);	6.01137e-06	0	0	0	3.00568e-06	0	0
Otu001438	3	Bacteria(100);Proteobacteria(100);Alphaproteobacteria(100);Rhizobiales(100);Hyphomicrobiaceae(100);Devosia(100);	0	0	9.01705e-06	0	0	0	0
Otu001439	3	Bacteria(100);Bacteroidetes(100);Sphingobacteriia(100);Sphingobacteriales(100);Saprospiraceae(100);unclassified(100);	0	0	0	3.00568e-06	0	0	9.01705e-06
Otu001440	3	Bacteria(100);Proteobacteria(100);Alphaproteobacteria(100);unclassified(100);unclassified(100);unclassified(100);	0	0	0	9.01705e-06	0	0	0
Otu001441	3	Bacteria(100);Proteobacteria(100);Alphaproteobacteria(100);Rickettsiales(100);AKIW1012(100);unclassified(100);	3.00568e-06	0	0	3.00568e-06	0	0	0
Otu001442	3	Bacteria(100);Proteobacteria(100);Alphaproteobacteria(100);unclassified(100);unclassified(100);unclassified(100);	0	0	0	0	3.00568e-06	0	0
Otu001443	3	Bacteria(100);Proteobacteria(100);Betaproteobacteria(100);Rhodocyclales(100);Rhodocyclaceae(100);Candidatus_Accumulibacter(100);	0	3.00568e-06	0	0	0	3.00568e-06	0
Otu001444	3	Bacteria(100);Proteobacteria(100);Gammaproteobacteria(100);unclassified(100);unclassified(100);unclassified(100);	0	6.01137e-06	0	0	0	0	9.01705e-06
Otu001445	3	Bacteria(100);Proteobacteria(100);Alphaproteobacteria(100);unclassified(100);unclassified(100);unclassified(100);	6.01137e-06	0	0	0	0	0	0
Otu001446	3	Bacteria(100);Proteobacteria(100);Gammaproteobacteria(100);unclassified(100);unclassified(100);unclassified(100);	0	3.00568e-06	0	0	0	0	0
Otu001447	3	Bacteria(100);Proteobacteria(100);Gammaproteobacteria(100);unclassified(100);unclassified(100);unclassified(100);	3.00568e-06	3.00568e-06	0	0	0	0	0
Otu001448	3	Bacteria(100);Chlorobi(100);Chlorobia(100);Chlorobiales(100);SJA-28(100);unclassified(100);	0	0	0	0	0	0	1.80341e-05
Otu001449	3	Bacteria(100);Chlorobi(100);Chlorobia(100);Chlorobiales(100);SJA-28(100);unclassified(100);	0	0	0	3.00568e-06	0	3.00568e-06	0
Otu001450	3	Bacteria(100);Proteobacteria(100);Alphaproteobacteria(100);unclassified(100);unclassified(100);unclassified(100);	0	0	0	9.01705e-06	0	0	0
Otu001451	3	Bacteria(100);Bacteroidetes(100);Sphingobacteriia(100);Sphingobacteriales(100);Chitinophagaceae(100);unclassified(100);	0	3.00568e-06	0	3.00568e-06	3.00568e-06	0	0
Otu001452	3	Bacteria(100);Bacteroidetes(100);Sphingobacteriia(100);Sphingobacteriales(100);Chitinophagaceae(100);unclassified(100);	6.01137e-06	3.00568e-06	0	0	0	0	0
Otu001453	3	Bacteria(100);Bacteroidetes(100);Sphingobacteriia(100);Sphingobacteriales(100);Chitinophagaceae(100);Ferruginibacter(67);	0	0	0	0	0	3.00568e-06	1.80341e-05
Otu001454	3	Bacteria(100);Proteobacteria(100);Betaproteobacteria(100);Rhodocyclales(100);Rhodocyclaceae(100);Candidatus_Accumulibacter(67);	0	0	6.01137e-06	0	0	0	0
Otu001455	3	Bacteria(100);Bacteroidetes(100);Sphingobacteriia(100);Sphingobacteriales(100);Saprospiraceae(100);unclassified(100);	0	3.00568e-06	0	3.00568e-06	0	3.00568e-06	0
Otu001456	3	Bacteria(100);Bacteroidetes(100);Sphingobacteriia(100);Sphingobacteriales(100);Saprospiraceae(100);Lewinella(67);	6.01137e-06	0	0	0	0	0	0
Otu001457	3	Bacteria(100);Bacteroidetes(100);Sphingobacteriia(100);Sphingobacteriales(100);Chitinophagaceae(100);Sediminibacterium(100);	0	0	0	3.00568e-06	3.00568e-06	3.00568e-06	0
Otu001459	3	Bacteria(100);Bacteroidetes(100);Sphingobacteriia(100);Sphingobacteriales(100);Saprospiraceae(100);Lewinella(100);	0	6.01137e-06	0	0	0	0	0
Otu001460	3	Bacteria(100);Bacteroidetes(100);Sphingobacteriia(100);Sphingobacteriales(100);Saprospiraceae(67);Lewinella(67);	0	3.00568e-06	0	3.00568e-06	0	0	0
Otu001461	3	Bacteria(100);Bacteroidetes(100);Sphingobacteriia(100);Sphingobacteriales(100);Chitinophagaceae(100);unclassified(100);	9.01705e-06	0	0	0	0	0	0
Otu001462	3	Bacteria(100);Bacteroidetes(100);Sphingobacteriia(100);Sphingobacteriales(100);Saprospiraceae(100);unclassified(100);	0	0	3.00568e-06	3.00568e-06	0	0	0
Otu001463	3	Bacteria(100);Proteobacteria(100);Alphaproteobacteria(100);Rhodobacterales(100);Rhodobacteraceae(100);Falsirhodobacter(67);	6.01137e-06	3.00568e-06	0	0	0	0	0
Otu001464	3	Bacteria(100);Proteobacteria(100);Alphaproteobacteria(100);Rhodobacterales(100);Rhodobacteraceae(100);unclassified(100);	6.01137e-06	0	3.00568e-06	0	0	0	0
Otu001465	3	Bacteria(100);Proteobacteria(100);Betaproteobacteria(100);unclassified(100);unclassified(100);unclassified(100);	3.00568e-06	3.00568e-06	0	3.00568e-06	0	0	0
Otu001466	3	Bacteria(100);Proteobacteria(100);Betaproteobacteria(100);unclassified(100);unclassified(100);unclassified(100);	0	0	0	0	0	0	9.01705e-06
Otu001467	3	Bacteria(100);Proteobacteria(100);Betaproteobacteria(100);unclassified(100);unclassified(100);unclassified(100);	3.00568e-06	3.00568e-06	3.00568e-06	0	0	0	0
Otu001468	3	Bacteria(100);Proteobacteria(100);Betaproteobacteria(100);unclassified(100);unclassified(100);unclassified(100);	0	0	6.01137e-06	0	3.00568e-06	0	0
Otu001469	3	Bacteria(100);Proteobacteria(100);Betaproteobacteria(100);Rhodocyclales(100);Rhodocyclaceae(100);unclassified(100);	0	0	3.00568e-06	0	3.00568e-06	3.00568e-06	0
Otu001470	3	Bacteria(100);Verrucomicrobia(100);Verrucomicrobiae(100);Verrucomicrobiales(100);Verrucomicrobiaceae(100);unclassified(100);	0	0	3.00568e-06	0	6.01137e-06	0	0
Otu001471	3	Bacteria(100);Verrucomicrobia(100);Verrucomicrobiae(100);Verrucomicrobiales(100);DEV007(100);unclassified(100);	3.00568e-06	0	0	3.00568e-06	0	0	0
Otu001472	3	Bacteria(100);Proteobacteria(100);Betaproteobacteria(100);unclassified(100);unclassified(100);unclassified(100);	6.01137e-06	0	0	0	0	0	0
Otu001473	3	Bacteria(100);Proteobacteria(100);Betaproteobacteria(100);unclassified(100);unclassified(100);unclassified(100);	3.00568e-06	0	3.00568e-06	3.00568e-06	0	0	0
Otu001474	3	Bacteria(100);Proteobacteria(100);Betaproteobacteria(100);Rhodocyclales(100);Rhodocyclaceae(100);unclassified(100);	0	0	3.00568e-06	3.00568e-06	0	3.00568e-06	0
Otu001475	3	Bacteria(100);Proteobacteria(100);Betaproteobacteria(100);Rhodocyclales(100);Rhodocyclaceae(100);unclassified(100);	0	0	0	0	0	9.01705e-06	0
Otu001476	3	Bacteria(100);Proteobacteria(100);Betaproteobacteria(100);unclassified(100);unclassified(100);unclassified(100);	0	0	0	0	0	0	0
Otu001477	3	Bacteria(100);Proteobacteria(100);Betaproteobacteria(100);unclassified(100);unclassified(100);unclassified(100);	0	0	0	3.00568e-06	3.00568e-06	0	9.01705e-06
Otu001478	3	Bacteria(100);Candidate_division_OD1(100);unclassified(100);unclassified(100);unclassified(100);unclassified(100);	6.01137e-06	0	0	0	0	0	0
Otu001479	3	Bacteria(100);Proteobacteria(100);Betaproteobacteria(100);unclassified(100);unclassified(100);unclassified(100);	3.00568e-06	0	0	0	6.01137e-06	0	0
Otu001480	3	Bacteria(100);Proteobacteria(100);Deltaproteobacteria(100);Bdellovibrionales(100);Bdellovibrionaceae(100);Bdellovibrio(100);	0	0	0	0	0	0	0
Otu001481	3	Bacteria(100);Proteobacteria(100);Deltaproteobacteria(100);Bdellovibrionales(100);Bdellovibrionaceae(100);Bdellovibrio(100);	0	0	0	6.01137e-06	0	3.00568e-06	0
Otu001482	3	Bacteria(100);Proteobacteria(100);Deltaproteobacteria(100);Bdellovibrionales(100);Bdellovibrionaceae(100);Bdellovibrio(100);	0	0	0	3.00568e-06	3.00568e-06	3.00568e-06	0
Otu001483	3	Bacteria(100);Proteobacteria(100);Gammaproteobacteria(100);Pseudomonadales(100);Pseudomonadaceae(100);Pseudomonas(100);	0	0	0	9.01705e-06	0	0	0
Otu001484	3	Bacteria(100);Proteobacteria(100);Gammaproteobacteria(100);Legionellales(100);Legionellaceae(100);Legionella(100);	9.01705e-06	0	0	0	0	0	0
Otu001485	3	Bacteria(100);Planctomycetes(100);Phycisphaerae(100);WD2101_soil_group(100);unclassified(100);unclassified(100);	0	0	0	3.00568e-06	3.00568e-06	0	0
Otu001486	3	Bacteria(100);Chloroflexi(100);Thermomicrobia(100);JG30-KF-CM45(100);unclassified(100);unclassified(100);	9.01705e-06	0	0	0	0	0	0
Otu001487	3	Bacteria(100);Proteobacteria(100);Gammaproteobacteria(100);Legionellales(100);Legionellaceae(100);Legionella(100);	9.01705e-06	0	0	0	0	0	0
Otu001488	3	Bacteria(100);Bacteroidetes(100);Cytophagia(100);Cytophagales(100);Cytophagaceae(100);Chryseolinea(67);	3.00568e-06	0	0	3.00568e-06	0	3.00568e-06	0
Otu001489	3	Bacteria(100);Proteobacteria(100);Deltaproteobacteria(100);Bdellovibrionales(100);Bdellovibrionaceae(100);Bdellovibrio(100);	0	0	0	3.00568e-06	0	6.01137e-06	0
Otu001490	3	Bacteria(100);Bacteroidetes(100);Cytophagia(100);Cytophagales(100);Cytophagaceae(100);Chryseolinea(100);	6.01137e-06	0	0	0	0	0	0
Otu001491	3	Bacteria(100);Cyanobacteria(100);Chloroplast(100);unclassified(100);unclassified(100);unclassified(100);	0	3.00568e-06	0	0	6.01137e-06	0	0
Otu001492	3	Bacteria(100);Bacteroidetes(100);Sphingobacteriia(100);Sphingobacteriales(100);Chitinophagaceae(100);Taibaiella(100);	0	0	3.00568e-06	3.00568e-06	0	0	0
Otu001493	3	Bacteria(100);Bacteroidetes(100);Sphingobacteriia(100);Sphingobacteriales(100);Chitinophagaceae(100);unclassified(67);	3.00568e-06	3.00568e-06	3.00568e-06	0	0	0	0
Otu001494	3	Bacteria(100);Bacteroidetes(100);Sphingobacteriia(100);Sphingobacteriales(100);Chitinophagaceae(100);Sediminibacterium(100);	0	0	0	0	3.00568e-06	3.00568e-06	0
Otu001495	3	Bacteria(100);Bacteroidetes(100);Sphingobacteriia(100);Sphingobacteriales(100);Chitinophagaceae(100);Sediminibacterium(100);	0	0	3.00568e-06	3.00568e-06	0	0	0
Otu001496	3	Bacteria(100);Bacteroidetes(100);Sphingobacteriia(100);Sphingobacteriales(100);Chitinophagaceae(100);Sediminibacterium(100);	0	0	3.00568e-06	0	0	0	0
Otu001497	3	Bacteria(100);Bacteroidetes(100);Cytophagia(100);Cytophagales(100);unclassified(100);unclassified(100);	3.00568e-06	6.01137e-06	0	0	0	0	0
Otu001498	3	Bacteria(100);Bacteroidetes(100);Sphingobacteriia(100);Sphingobacteriales(100);Chitinophagaceae(100);unclassified(100);	0	0	3.00568e-06	0	3.00568e-06	0	0
Otu001499	3	Bacteria(100);Bacteroidetes(100);Sphingobacteriia(100);Sphingobacteriales(100);Chitinophagaceae(100);unclassified(100);	3.00568e-06	0	0	3.00568e-06	0	0	9.01705e-06
Otu001500	3	Bacteria(100);Bacteroidetes(100);Sphingobacteriia(100);Sphingobacteriales(100);unclassified(100);unclassified(100);	0	3.00568e-06	3.00568e-06	0	3.00568e-06	0	0
Otu001501	3	Bacteria(100);Bacteroidetes(100);Sphingobacteriia(100);Sphingobacteriales(100);Saprospiraceae(100);unclassified(100);	0	0	6.01137e-06	0	0	0	0
Otu001502	3	Bacteria(100);Bacteroidetes(100);Sphingobacteriia(100);Sphingobacteriales(100);Chitinophagaceae(100);Sediminibacterium(100);	0	0	0	6.01137e-06	0	0	0
Otu001503	3	Bacteria(100);Bacteroidetes(100);Sphingobacteriia(100);Sphingobacteriales(100);Chitinophagaceae(100);unclassified(100);	0	0	0	6.01137e-06	0	0	9.01705e-06
Otu001504	3	Bacteria(100);Bacteroidetes(100);Sphingobacteriia(100);Sphingobacteriales(100);Chitinophagaceae(100);unclassified(100);	0	0	3.00568e-06	0	0	3.00568e-06	0
Otu001505	3	Bacteria(100);Bacteroidetes(100);Sphingobacteriia(100);Sphingobacteriales(100);NS11-12_marine_group(67);unclassified(67);	3.00568e-06	3.00568e-06	3.00568e-06	0	0	0	0
Otu001506	3	Bacteria(100);Bacteroidetes(100);Sphingobacteriia(100);Sphingobacteriales(100);Saprospiraceae(100);unclassified(100);	0	0	0	0	0	3.00568e-06	0
Otu001507	3	Bacteria(100);Bacteroidetes(100);Sphingobacteriia(100);Sphingobacteriales(100);Chitinophagaceae(100);Sediminibacterium(100);	0	0	0	3.00568e-06	0	0	0
Otu001508	3	Bacteria(100);Proteobacteria(100);Betaproteobacteria(100);Rhodocyclales(100);Rhodocyclaceae(100);Candidatus_Accumulibacter(67);	0	0	0	3.00568e-06	3.00568e-06	0	0
Otu001509	3	Bacteria(100);Bacteroidetes(100);Sphingobacteriia(100);Sphingobacteriales(100);Chitinophagaceae(67);unclassified(67);	3.00568e-06	3.00568e-06	0	3.00568e-06	0	0	0
Otu001510	3	Bacteria(100);Proteobacteria(100);Betaproteobacteria(100);Rhodocyclales(100);Rhodocyclaceae(100);unclassified(100);	3.00568e-06	0	6.01137e-06	0	0	0	0
Otu001511	3	Bacteria(100);Proteobacteria(100);Betaproteobacteria(100);Rhodocyclales(100);Rhodocyclaceae(100);unclassified(67);	0	3.00568e-06	3.00568e-06	0	0	0	0
Otu001512	3	Bacteria(100);Proteobacteria(100);Betaproteobacteria(100);Rhodocyclales(100);Rhodocyclaceae(100);unclassified(100);	3.00568e-06	3.00568e-06	0	0	0	0	0
Otu001513	3	Bacteria(100);Proteobacteria(100);Betaproteobacteria(100);Rhodocyclales(100);Rhodocyclaceae(100);unclassified(100);	0	0	0	3.00568e-06	3.00568e-06	3.00568e-06	0
Otu001514	3	Bacteria(100);Verrucomicrobia(100);OPB35_soil_group(100);Unknown_Order(100);Unknown_Family(100);Pedosphaera(100);	3.00568e-06	0	0	0	6.01137e-06	0	0
Otu001515	3	Bacteria(100);Proteobacteria(100);Betaproteobacteria(100);Rhodocyclales(100);Rhodocyclaceae(100);unclassified(67);	0	0	0	0	3.00568e-06	6.01137e-06	0
Otu001516	3	Bacteria(100);Proteobacteria(100);Betaproteobacteria(100);Rhodocyclales(100);Rhodocyclaceae(100);Candidatus_Accumulibacter(100);	3.00568e-06	6.01137e-06	0	0	0	0	0
Otu001517	3	Bacteria(100);Proteobacteria(100);Betaproteobacteria(100);unclassified(100);unclassified(100);unclassified(100);	0	9.01705e-06	0	0	0	0	0
Otu001518	3	Bacteria(100);Proteobacteria(100);Betaproteobacteria(100);Rhodocyclales(100);Rhodocyclaceae(100);Candidatus_Accumulibacter(100);	0	0	6.01137e-06	3.00568e-06	0	0	0
Otu001519	3	Bacteria(100);Proteobacteria(100);Betaproteobacteria(100);Rhodocyclales(100);Rhodocyclaceae(100);Candidatus_Accumulibacter(100);	0	3.00568e-06	3.00568e-06	0	0	0	0
Otu001520	3	Bacteria(100);Proteobacteria(100);Betaproteobacteria(100);Rhodocyclales(100);Rhodocyclaceae(100);Candidatus_Accumulibacter(100);	0	6.01137e-06	0	0	0	3.00568e-06	0
Otu001521	3	Bacteria(100);Proteobacteria(100);Betaproteobacteria(100);Rhodocyclales(100);Rhodocyclaceae(100);Candidatus_Accumulibacter(67);	0	0	0	3.00568e-06	0	3.00568e-06	0
Otu001522	3	Bacteria(100);Proteobacteria(100);Betaproteobacteria(100);Rhodocyclales(100);Rhodocyclaceae(100);unclassified(67);	0	0	0	0	3.00568e-06	0	9.01705e-06
Otu001524	3	Bacteria(100);Proteobacteria(100);Betaproteobacteria(100);Rhodocyclales(100);Rhodocyclaceae(100);unclassified(100);	0	0	0	0	0	0	0
Otu001525	3	Bacteria(100);Proteobacteria(100);Betaproteobacteria(100);Rhodocyclales(100);Rhodocyclaceae(100);unclassified(100);	0	0	0	0	0	3.00568e-06	9.01705e-06
Otu001526	3	Bacteria(100);Proteobacteria(100);Betaproteobacteria(100);Rhodocyclales(100);Rhodocyclaceae(100);unclassified(100);	0	0	0	0	3.00568e-06	6.01137e-06	0
Otu001527	3	Bacteria(100);Proteobacteria(100);Betaproteobacteria(100);Rhodocyclales(100);Rhodocyclaceae(100);unclassified(100);	0	0	3.00568e-06	3.00568e-06	0	3.00568e-06	0
Otu001528	3	Bacteria(100);Proteobacteria(100);Betaproteobacteria(100);Rhodocyclales(100);Rhodocyclaceae(100);unclassified(100);	0	6.01137e-06	3.00568e-06	0	0	0	0
Otu001529	3	Bacteria(100);Proteobacteria(100);Betaproteobacteria(100);Rhodocyclales(100);Rhodocyclaceae(100);unclassified(100);	0	0	3.00568e-06	3.00568e-06	0	0	0
Otu001530	3	Bacteria(100);Proteobacteria(100);Betaproteobacteria(100);Rhodocyclales(100);Rhodocyclaceae(100);unclassified(100);	0	0	0	3.00568e-06	3.00568e-06	0	9.01705e-06
Otu001531	3	Bacteria(100);Proteobacteria(100);Betaproteobacteria(100);Rhodocyclales(100);Rhodocyclaceae(100);Candidatus_Accumulibacter(100);	0	0	0	6.01137e-06	0	3.00568e-06	0
Otu001532	3	Bacteria(100);Proteobacteria(100);Betaproteobacteria(100);Rhodocyclales(100);Rhodocyclaceae(100);Candidatus_Accumulibacter(100);	3.00568e-06	0	3.00568e-06	3.00568e-06	0	0	0
Otu001533	3	Bacteria(100);Proteobacteria(100);Betaproteobacteria(100);Rhodocyclales(100);Rhodocyclaceae(100);Candidatus_Accumulibacter(100);	0	0	3.00568e-06	0	0	0	0
Otu001534	3	Bacteria(100);Proteobacteria(100);Betaproteobacteria(100);Rhodocyclales(100);Rhodocyclaceae(100);unclassified(100);	0	0	3.00568e-06	0	3.00568e-06	3.00568e-06	0
Otu001535	3	Bacteria(100);Proteobacteria(100);Betaproteobacteria(100);Rhodocyclales(100);Rhodocyclaceae(100);unclassified(100);	0	0	3.00568e-06	0	3.00568e-06	0	0
Otu001536	3	Bacteria(100);Proteobacteria(100);Betaproteobacteria(100);Rhodocyclales(100);Rhodocyclaceae(100);unclassified(67);	0	0	0	6.01137e-06	0	0	0
Otu001537	3	Bacteria(100);Proteobacteria(100);Betaproteobacteria(100);Rhodocyclales(100);Rhodocyclaceae(100);Candidatus_Accumulibacter(100);	0	0	0	3.00568e-06	3.00568e-06	0	9.01705e-06
Otu001538	3	Bacteria(100);Proteobacteria(100);Betaproteobacteria(100);Rhodocyclales(100);Rhodocyclaceae(100);Candidatus_Accumulibacter(100);	3.00568e-06	0	3.00568e-06	0	3.00568e-06	0	0
Otu001539	3	Bacteria(100);Proteobacteria(100);Betaproteobacteria(100);Rhodocyclales(100);Rhodocyclaceae(100);Candidatus_Accumulibacter(67);	0	0	0	3.00568e-06	3.00568e-06	0	0
Otu001540	3	Bacteria(100);Proteobacteria(100);Betaproteobacteria(100);Rhodocyclales(100);Rhodocyclaceae(100);unclassified(100);	0	0	0	3.00568e-06	0	0	9.01705e-06
Otu001541	3	Bacteria(100);Proteobacteria(100);Betaproteobacteria(100);Rhodocyclales(100);Rhodocyclaceae(100);unclassified(100);	0	0	3.00568e-06	0	3.00568e-06	0	9.01705e-06
Otu001542	3	Bacteria(100);Proteobacteria(100);Betaproteobacteria(100);Rhodocyclales(100);Rhodocyclaceae(100);unclassified(100);	0	0	0	0	0	3.00568e-06	0
Otu001543	3	Bacteria(100);Proteobacteria(100);Betaproteobacteria(100);Rhodocyclales(100);Rhodocyclaceae(100);unclassified(100);	3.00568e-06	0	3.00568e-06	0	0	0	0
Otu001544	3	Bacteria(100);Proteobacteria(100);Betaproteobacteria(100);Rhodocyclales(100);Rhodocyclaceae(100);unclassified(100);	3.00568e-06	0	3.00568e-06	3.00568e-06	0	0	0
Otu001545	3	Bacteria(100);Proteobacteria(100);Betaproteobacteria(100);Rhodocyclales(100);Rhodocyclaceae(100);Candidatus_Accumulibacter(100);	0	0	3.00568e-06	3.00568e-06	3.00568e-06	0	0
Otu001546	3	Bacteria(100);Proteobacteria(100);Betaproteobacteria(100);Rhodocyclales(100);Rhodocyclaceae(100);Candidatus_Accumulibacter(67);	3.00568e-06	0	3.00568e-06	3.00568e-06	0	0	0
Otu001547	3	Bacteria(100);Proteobacteria(100);Betaproteobacteria(100);Rhodocyclales(100);Rhodocyclaceae(100);unclassified(100);	0	0	0	3.00568e-06	3.00568e-06	0	0
Otu001548	3	Bacteria(100);Proteobacteria(100);Betaproteobacteria(100);Rhodocyclales(100);Rhodocyclaceae(100);Candidatus_Accumulibacter(100);	0	0	0	0	3.00568e-06	0	0
Otu001549	3	Bacteria(100);Proteobacteria(100);Betaproteobacteria(100);Rhodocyclales(100);Rhodocyclaceae(100);unclassified(67);	0	0	0	0	6.01137e-06	3.00568e-06	0
Otu001550	3	Bacteria(100);Proteobacteria(100);Betaproteobacteria(100);Rhodocyclales(100);Rhodocyclaceae(100);Dechloromonas(67);	0	6.01137e-06	0	3.00568e-06	0	0	0
Otu001551	3	Bacteria(100);Proteobacteria(100);Betaproteobacteria(100);unclassified(100);unclassified(100);unclassified(100);	0	0	0	0	0	0	0
Otu001552	3	Bacteria(100);Proteobacteria(100);Betaproteobacteria(100);Rhodocyclales(100);Rhodocyclaceae(100);unclassified(100);	0	0	0	3.00568e-06	3.00568e-06	3.00568e-06	0
Otu001553	3	Bacteria(100);Proteobacteria(100);Betaproteobacteria(100);unclassified(100);unclassified(100);unclassified(100);	0	0	0	3.00568e-06	0	6.01137e-06	0
Otu001554	3	Bacteria(100);Proteobacteria(100);Betaproteobacteria(100);unclassified(100);unclassified(100);unclassified(100);	0	0	0	0	3.00568e-06	3.00568e-06	0
Otu001555	3	Bacteria(100);Proteobacteria(100);Betaproteobacteria(100);unclassified(100);unclassified(100);unclassified(100);	3.00568e-06	3.00568e-06	0	0	0	0	0
Otu001556	3	Bacteria(100);Proteobacteria(100);Betaproteobacteria(100);unclassified(100);unclassified(100);unclassified(100);	0	0	0	0	0	9.01705e-06	0
Otu001557	3	Bacteria(100);Proteobacteria(100);Betaproteobacteria(100);unclassified(100);unclassified(100);unclassified(100);	0	0	6.01137e-06	3.00568e-06	0	0	0
Otu001558	3	Bacteria(100);Proteobacteria(100);Betaproteobacteria(100);unclassified(100);unclassified(100);unclassified(100);	0	0	9.01705e-06	0	0	0	0
Otu001559	3	Bacteria(100);Proteobacteria(100);Betaproteobacteria(100);unclassified(100);unclassified(100);unclassified(100);	0	3.00568e-06	6.01137e-06	0	0	0	0
Otu001560	3	Bacteria(100);Proteobacteria(100);Betaproteobacteria(100);unclassified(100);unclassified(100);unclassified(100);	3.00568e-06	0	0	3.00568e-06	3.00568e-06	0	0
Otu001561	3	Bacteria(100);Proteobacteria(100);Betaproteobacteria(100);unclassified(100);unclassified(100);unclassified(100);	0	3.00568e-06	0	0	0	0	0
Otu001562	3	Bacteria(100);Proteobacteria(100);Betaproteobacteria(100);unclassified(100);unclassified(100);unclassified(100);	0	0	0	0	0	0	0
Otu001563	3	Bacteria(100);Proteobacteria(100);Betaproteobacteria(100);Rhodocyclales(100);Rhodocyclaceae(100);unclassified(100);	0	0	0	0	0	6.01137e-06	0
Otu001564	2	Bacteria(100);Bacteroidetes(100);Bacteroidia(100);Bacteroidales(100);Rikenellaceae(100);Blvii28_wastewater-sludge_group(100);	6.01137e-06	0	0	0	0	0	0
Otu001565	2	Bacteria(100);Bacteroidetes(100);Bacteroidia(100);Bacteroidales(100);Rikenellaceae(100);Blvii28_wastewater-sludge_group(100);	6.01137e-06	0	0	0	0	0	0
Otu001566	2	Bacteria(100);Spirochaetae(100);Spirochaetes(100);Spirochaetales(100);Leptospiraceae(100);Turneriella(100);	3.00568e-06	0	3.00568e-06	0	0	0	0
Otu001567	2	Bacteria(100);Cyanobacteria(100);Melainabacteria(100);Obscuribacterales(100);unclassified(100);unclassified(100);	0	0	0	0	0	0	9.01705e-06
Otu001568	2	Bacteria(100);Spirochaetae(100);Spirochaetes(100);Spirochaetales(100);Leptospiraceae(100);Turneriella(100);	3.00568e-06	0	0	0	0	0	9.01705e-06
Otu001569	2	Bacteria(100);Proteobacteria(100);Betaproteobacteria(100);unclassified(100);unclassified(100);unclassified(100);	0	0	0	3.00568e-06	0	0	0
Otu001570	2	Bacteria(100);Chlorobi(100);Chlorobia(100);Chlorobiales(100);SJA-28(100);unclassified(100);	3.00568e-06	0	0	0	0	3.00568e-06	0
Otu001571	2	Bacteria(100);Chlorobi(100);Chlorobia(100);Chlorobiales(100);SJA-28(100);unclassified(100);	0	0	0	0	0	3.00568e-06	0
Otu001572	2	Bacteria(100);Chlorobi(100);Chlorobia(100);Chlorobiales(100);SJA-28(100);unclassified(100);	0	0	3.00568e-06	0	0	0	0
Otu001573	2	Bacteria(100);Cyanobacteria(100);Melainabacteria(100);Obscuribacterales(100);unclassified(100);unclassified(100);	0	0	0	0	0	0	0
Otu001574	2	Bacteria(100);Spirochaetae(100);Spirochaetes(100);Spirochaetales(100);Leptospiraceae(100);Leptonema(100);	0	0	3.00568e-06	0	0	0	0
Otu001576	2	Bacteria(100);Chlorobi(100);Chlorobia(100);Chlorobiales(100);SJA-28(100);unclassified(100);	0	0	0	3.00568e-06	0	0	9.01705e-06
Otu001577	2	Bacteria(100);Proteobacteria(100);Betaproteobacteria(100);unclassified(100);unclassified(100);unclassified(100);	0	0	0	0	0	3.00568e-06	9.01705e-06
Otu001578	2	Bacteria(100);Bacteroidetes(100);Bacteroidia(100);Bacteroidales(100);Prevotellaceae(100);Alloprevotella(100);	0	6.01137e-06	0	0	0	0	0
Otu001579	2	Bacteria(100);Proteobacteria(100);Gammaproteobacteria(100);Xanthomonadales(100);Xanthomonadaceae(100);Aquimonas(100);	0	0	3.00568e-06	0	0	3.00568e-06	0
Otu001580	2	Bacteria(100);Spirochaetae(100);Spirochaetes(100);Spirochaetales(100);Leptospiraceae(100);Turneriella(100);	0	3.00568e-06	0	0	0	0	0
Otu001581	2	Bacteria(100);Bacteroidetes(100);Sphingobacteriia(100);Sphingobacteriales(100);unclassified(100);unclassified(100);	0	0	6.01137e-06	0	0	0	0
Otu001582	2	Bacteria(100);Proteobacteria(100);Gammaproteobacteria(100);Chromatiales(100);Chromatiaceae(100);Rheinheimera(100);	0	0	0	3.00568e-06	0	0	0
Otu001583	2	Bacteria(100);Spirochaetae(100);Spirochaetes(100);Spirochaetales(100);Leptospiraceae(100);Turneriella(100);	0	0	6.01137e-06	0	0	0	0
Otu001584	2	Bacteria(100);Chlorobi(100);Chlorobia(100);Chlorobiales(100);SJA-28(100);unclassified(100);	0	0	0	0	0	3.00568e-06	0
Otu001585	2	Bacteria(100);Chlorobi(100);Chlorobia(100);Chlorobiales(100);SJA-28(100);unclassified(100);	0	0	0	3.00568e-06	0	0	0
Otu001586	2	Bacteria(100);Proteobacteria(100);Gammaproteobacteria(100);NKB5(100);unclassified(100);unclassified(100);	0	3.00568e-06	0	0	0	3.00568e-06	0
Otu001587	2	Bacteria(100);Proteobacteria(100);Gammaproteobacteria(100);Xanthomonadales(100);Xanthomonadaceae(100);unclassified(100);	0	0	0	0	3.00568e-06	0	0
Otu001588	2	Bacteria(100);Chlorobi(100);Chlorobia(100);Chlorobiales(100);SJA-28(100);unclassified(100);	0	0	0	3.00568e-06	3.00568e-06	0	0
Otu001589	2	Bacteria(100);Chlorobi(100);Chlorobia(100);Chlorobiales(100);SJA-28(100);unclassified(100);	0	0	0	0	0	3.00568e-06	9.01705e-06
Otu001590	2	Bacteria(100);Chlorobi(100);Chlorobia(100);Chlorobiales(100);SJA-28(100);unclassified(100);	0	0	0	0	3.00568e-06	3.00568e-06	0
Otu001591	2	Bacteria(100);Chlorobi(100);Chlorobia(100);Chlorobiales(100);SJA-28(100);unclassified(100);	0	3.00568e-06	0	3.00568e-06	0	0	0
Otu001592	2	Bacteria(100);Chlorobi(100);Chlorobia(100);Chlorobiales(100);SJA-28(100);unclassified(100);	0	0	0	0	0	0	0
Otu001593	2	Bacteria(100);Chlorobi(100);Chlorobia(100);Chlorobiales(100);SJA-28(100);unclassified(100);	0	0	0	0	3.00568e-06	0	0
Otu001594	2	Bacteria(100);Chlorobi(100);Chlorobia(100);Chlorobiales(100);SJA-28(100);unclassified(100);	0	3.00568e-06	0	0	0	0	0
Otu001595	2	Bacteria(100);Chlorobi(100);Chlorobia(100);Chlorobiales(100);SJA-28(100);unclassified(100);	0	0	0	3.00568e-06	0	0	0
Otu001596	2	Bacteria(100);Chlorobi(100);Chlorobia(100);Chlorobiales(100);SJA-28(100);unclassified(100);	0	0	0	0	0	6.01137e-06	0
Otu001597	2	Bacteria(100);Chlorobi(100);Chlorobia(100);Chlorobiales(100);SJA-28(100);unclassified(100);	0	0	0	0	0	0	0
Otu001598	2	Bacteria(100);Chlorobi(100);Chlorobia(100);Chlorobiales(100);SJA-28(100);unclassified(100);	0	0	0	0	3.00568e-06	0	0
Otu001599	2	Bacteria(100);Chlorobi(100);Chlorobia(100);Chlorobiales(100);SJA-28(100);unclassified(100);	3.00568e-06	0	0	0	0	0	0
Otu001600	2	Bacteria(100);Bacteroidetes(100);Cytophagia(100);Cytophagales(100);Cytophagaceae(100);Chryseolinea(100);	3.00568e-06	0	0	0	0	0	0
Otu001601	2	Bacteria(100);Bacteroidetes(100);Cytophagia(100);Cytophagales(100);Cytophagaceae(100);Ohtaekwangia(100);	3.00568e-06	3.00568e-06	0	0	0	0	0
Otu001602	2	Bacteria(100);Proteobacteria(100);Gammaproteobacteria(100);Legionellales(100);Legionellaceae(100);Legionella(100);	6.01137e-06	0	0	0	0	0	0
Otu001603	2	Bacteria(100);Proteobacteria(100);Gammaproteobacteria(100);Legionellales(100);Legionellaceae(100);Legionella(100);	0	0	0	0	0	6.01137e-06	0
Otu001605	2	Bacteria(100);Proteobacteria(100);Betaproteobacteria(100);TRA3-20(100);unclassified(100);unclassified(100);	0	6.01137e-06	0	0	0	0	0
Otu001606	2	Bacteria(100);Proteobacteria(100);Betaproteobacteria(100);TRA3-20(100);unclassified(100);unclassified(100);	3.00568e-06	0	0	0	0	0	0
Otu001607	2	Bacteria(100);Proteobacteria(100);Gammaproteobacteria(100);unclassified(100);unclassified(100);unclassified(100);	0	0	3.00568e-06	0	0	0	0
Otu001608	2	Bacteria(100);Proteobacteria(100);Betaproteobacteria(100);unclassified(100);unclassified(100);unclassified(100);	3.00568e-06	3.00568e-06	0	0	0	0	0
Otu001609	2	Bacteria(100);Proteobacteria(100);Gammaproteobacteria(100);unclassified(100);unclassified(100);unclassified(100);	0	0	0	0	0	3.00568e-06	9.01705e-06
Otu001610	2	Bacteria(100);Planctomycetes(100);Phycisphaerae(100);Phycisphaerales(100);Phycisphaeraceae(100);SM1A02(100);	0	0	0	0	3.00568e-06	3.00568e-06	0
Otu001611	2	Bacteria(100);Chlorobi(100);Chlorobia(100);Chlorobiales(100);SJA-28(100);unclassified(100);	0	0	0	0	3.00568e-06	0	0
Otu001612	2	Bacteria(100);Chlorobi(100);Chlorobia(100);Chlorobiales(100);SJA-28(100);unclassified(100);	0	0	0	0	0	6.01137e-06	0
Otu001613	2	Bacteria(100);Chlorobi(100);Chlorobia(100);Chlorobiales(100);SJA-28(100);unclassified(100);	0	0	0	0	3.00568e-06	0	0
Otu001614	2	Bacteria(100);Chlorobi(100);Chlorobia(100);Chlorobiales(100);SJA-28(100);unclassified(100);	0	0	0	0	0	3.00568e-06	9.01705e-06
Otu001615	2	Bacteria(100);Chlorobi(100);Chlorobia(100);Chlorobiales(100);SJA-28(100);unclassified(100);	0	0	0	0	0	6.01137e-06	0
Otu001616	2	Bacteria(100);Chlorobi(100);Chlorobia(100);Chlorobiales(100);SJA-28(100);unclassified(100);	0	0	0	0	0	0	0
Otu001617	2	Bacteria(100);Chlorobi(100);Chlorobia(100);Chlorobiales(100);SJA-28(100);unclassified(100);	0	0	0	0	0	0	0
Otu001618	2	Bacteria(100);Chlorobi(100);Chlorobia(100);Chlorobiales(100);SJA-28(100);unclassified(100);	0	0	0	0	0	3.00568e-06	0
Otu001619	2	Bacteria(100);Chlorobi(100);Chlorobia(100);Chlorobiales(100);OPB56(100);unclassified(100);	3.00568e-06	0	0	0	0	3.00568e-06	0
Otu001620	2	Bacteria(100);Chlorobi(100);Chlorobia(100);Chlorobiales(100);SJA-28(100);unclassified(100);	0	0	0	3.00568e-06	0	3.00568e-06	0
Otu001621	2	Bacteria(100);Chlorobi(100);Chlorobia(100);Chlorobiales(100);SJA-28(100);unclassified(100);	0	0	0	0	3.00568e-06	3.00568e-06	0
Otu001622	2	Bacteria(100);Chlorobi(100);Chlorobia(100);Chlorobiales(100);SJA-28(100);unclassified(100);	0	0	0	0	0	6.01137e-06	0
Otu001623	2	Bacteria(100);Chlorobi(100);Chlorobia(100);Chlorobiales(100);SJA-28(100);unclassified(100);	0	0	0	0	0	6.01137e-06	0
Otu001624	2	Bacteria(100);Chlorobi(100);Chlorobia(100);Chlorobiales(100);SJA-28(100);unclassified(100);	0	0	0	3.00568e-06	0	3.00568e-06	0
Otu001625	2	Bacteria(100);Chlorobi(100);Chlorobia(100);Chlorobiales(100);SJA-28(100);unclassified(100);	0	0	0	3.00568e-06	0	3.00568e-06	0
Otu001626	2	Bacteria(100);Chlorobi(100);Chlorobia(100);Chlorobiales(100);SJA-28(100);unclassified(100);	0	0	0	3.00568e-06	3.00568e-06	0	0
Otu001627	2	Bacteria(100);Chlorobi(100);Chlorobia(100);Chlorobiales(100);SJA-28(100);unclassified(100);	0	0	0	3.00568e-06	0	3.00568e-06	0
Otu001628	2	Bacteria(100);Chlorobi(100);Chlorobia(100);Chlorobiales(100);SJA-28(100);unclassified(100);	0	0	0	3.00568e-06	0	3.00568e-06	0
Otu001629	2	Bacteria(100);Proteobacteria(100);Gammaproteobacteria(100);unclassified(100);unclassified(100);unclassified(100);	0	3.00568e-06	0	0	0	3.00568e-06	0
Otu001630	2	Bacteria(100);Proteobacteria(100);Gammaproteobacteria(100);unclassified(100);unclassified(100);unclassified(100);	0	0	0	6.01137e-06	0	0	0
Otu001631	2	Bacteria(100);Proteobacteria(100);Gammaproteobacteria(100);unclassified(100);unclassified(100);unclassified(100);	0	6.01137e-06	0	0	0	0	0
Otu001632	2	Bacteria(100);Proteobacteria(100);Gammaproteobacteria(100);unclassified(100);unclassified(100);unclassified(100);	0	0	0	6.01137e-06	0	0	0
Otu001633	2	Bacteria(100);Proteobacteria(100);Gammaproteobacteria(100);unclassified(100);unclassified(100);unclassified(100);	0	3.00568e-06	0	0	0	3.00568e-06	0
Otu001634	2	Bacteria(100);Proteobacteria(100);Gammaproteobacteria(100);Chromatiales(100);Chromatiaceae(100);Rheinheimera(100);	0	0	3.00568e-06	0	0	0	0
Otu001636	2	Bacteria(100);Proteobacteria(100);Gammaproteobacteria(100);unclassified(100);unclassified(100);unclassified(100);	0	3.00568e-06	0	0	0	3.00568e-06	0
Otu001637	2	Bacteria(100);Proteobacteria(100);Gammaproteobacteria(100);Chromatiales(100);Chromatiaceae(100);unclassified(100);	0	3.00568e-06	0	0	3.00568e-06	0	0
Otu001638	2	Bacteria(100);Proteobacteria(100);Gammaproteobacteria(100);unclassified(100);unclassified(100);unclassified(100);	0	0	6.01137e-06	0	0	0	0
Otu001639	2	Bacteria(100);Proteobacteria(100);Betaproteobacteria(100);unclassified(100);unclassified(100);unclassified(100);	0	0	0	0	0	0	1.80341e-05
Otu001640	2	Bacteria(100);Cyanobacteria(100);Melainabacteria(100);Obscuribacterales(100);unclassified(100);unclassified(100);	0	0	0	0	0	3.00568e-06	0
Otu001642	2	Bacteria(100);Cyanobacteria(100);Melainabacteria(100);Obscuribacterales(100);unclassified(100);unclassified(100);	0	0	0	0	3.00568e-06	0	9.01705e-06
Otu001644	2	Bacteria(100);Proteobacteria(100);Gammaproteobacteria(100);Chromatiales(100);Chromatiaceae(100);Rheinheimera(100);	0	3.00568e-06	3.00568e-06	0	0	0	0
Otu001645	2	Bacteria(100);Cyanobacteria(100);Melainabacteria(100);Obscuribacterales(100);unclassified(100);unclassified(100);	0	0	3.00568e-06	0	0	3.00568e-06	0
Otu001646	2	Bacteria(100);Cyanobacteria(100);Melainabacteria(100);Obscuribacterales(100);unclassified(100);unclassified(100);	0	0	0	3.00568e-06	0	0	0
Otu001647	2	Bacteria(100);Bacteroidetes(100);Flavobacteriia(100);Flavobacteriales(100);Flavobacteriaceae(100);unclassified(100);	0	0	0	0	0	3.00568e-06	9.01705e-06
Otu001648	2	Bacteria(100);Proteobacteria(100);Gammaproteobacteria(100);unclassified(100);unclassified(100);unclassified(100);	0	0	0	0	0	0	0
Otu001649	2	Bacteria(100);Proteobacteria(100);Gammaproteobacteria(100);unclassified(100);unclassified(100);unclassified(100);	0	0	0	3.00568e-06	0	0	0
Otu001650	2	Bacteria(100);Proteobacteria(100);Gammaproteobacteria(100);unclassified(100);unclassified(100);unclassified(100);	3.00568e-06	0	0	0	0	0	0
Otu001651	2	Bacteria(100);Proteobacteria(100);Gammaproteobacteria(100);unclassified(100);unclassified(100);unclassified(100);	3.00568e-06	3.00568e-06	0	0	0	0	0
Otu001652	2	Bacteria(100);Proteobacteria(100);Gammaproteobacteria(100);unclassified(100);unclassified(100);unclassified(100);	0	0	0	3.00568e-06	3.00568e-06	0	0
Otu001653	2	Bacteria(100);Proteobacteria(100);Gammaproteobacteria(100);unclassified(100);unclassified(100);unclassified(100);	3.00568e-06	0	0	0	0	0	0
Otu001654	2	Bacteria(100);Proteobacteria(100);Gammaproteobacteria(100);unclassified(100);unclassified(100);unclassified(100);	6.01137e-06	0	0	0	0	0	0
Otu001655	2	Bacteria(100);Bacteroidetes(100);Sphingobacteriia(100);Sphingobacteriales(100);Chitinophagaceae(100);unclassified(100);	0	3.00568e-06	0	0	0	3.00568e-06	0
Otu001656	2	Bacteria(100);Proteobacteria(100);Gammaproteobacteria(100);unclassified(100);unclassified(100);unclassified(100);	0	6.01137e-06	0	0	0	0	0
Otu001657	2	Bacteria(100);Proteobacteria(100);Gammaproteobacteria(100);unclassified(100);unclassified(100);unclassified(100);	0	0	6.01137e-06	0	0	0	0
Otu001658	2	Bacteria(100);Proteobacteria(100);Gammaproteobacteria(100);unclassified(100);unclassified(100);unclassified(100);	0	0	3.00568e-06	0	0	0	0
Otu001659	2	Bacteria(100);Proteobacteria(100);Gammaproteobacteria(100);unclassified(100);unclassified(100);unclassified(100);	0	0	3.00568e-06	3.00568e-06	0	0	0
Otu001660	2	Bacteria(100);Proteobacteria(100);Gammaproteobacteria(100);unclassified(100);unclassified(100);unclassified(100);	6.01137e-06	0	0	0	0	0	0
Otu001661	2	Bacteria(100);Proteobacteria(100);Betaproteobacteria(100);unclassified(100);unclassified(100);unclassified(100);	0	0	0	0	3.00568e-06	3.00568e-06	0
Otu001662	2	Bacteria(100);Proteobacteria(100);Gammaproteobacteria(100);unclassified(100);unclassified(100);unclassified(100);	3.00568e-06	0	0	0	0	0	0
Otu001663	2	Bacteria(100);Proteobacteria(100);Gammaproteobacteria(100);unclassified(100);unclassified(100);unclassified(100);	0	6.01137e-06	0	0	0	0	0
Otu001664	2	Bacteria(100);Proteobacteria(100);Gammaproteobacteria(100);unclassified(100);unclassified(100);unclassified(100);	0	0	0	0	0	3.00568e-06	0
Otu001665	2	Bacteria(100);Proteobacteria(100);Gammaproteobacteria(100);unclassified(100);unclassified(100);unclassified(100);	0	3.00568e-06	0	0	0	0	0
Otu001666	2	Bacteria(100);Proteobacteria(100);Gammaproteobacteria(100);Chromatiales(100);Chromatiaceae(100);Rheinheimera(100);	0	3.00568e-06	0	0	0	0	0
Otu001667	2	Bacteria(100);Chlorobi(100);Chlorobia(100);Chlorobiales(100);SJA-28(100);unclassified(100);	0	0	0	0	3.00568e-06	3.00568e-06	0
Otu001668	2	Bacteria(100);Chlorobi(100);Chlorobia(100);Chlorobiales(100);SJA-28(100);unclassified(100);	0	0	0	0	3.00568e-06	0	0
Otu001669	2	Bacteria(100);Chlorobi(100);Chlorobia(100);Chlorobiales(100);SJA-28(100);unclassified(100);	0	0	0	0	3.00568e-06	0	0
Otu001670	2	Bacteria(100);Chlorobi(100);Chlorobia(100);Chlorobiales(100);SJA-28(100);unclassified(100);	0	0	0	0	3.00568e-06	0	0
Otu001671	2	Bacteria(100);Chlorobi(100);Chlorobia(100);Chlorobiales(100);SJA-28(100);unclassified(100);	0	0	0	0	3.00568e-06	0	0
Otu001672	2	Bacteria(100);Chlorobi(100);Chlorobia(100);Chlorobiales(100);SJA-28(100);unclassified(100);	0	0	0	0	3.00568e-06	0	0
Otu001674	2	Bacteria(100);Chlorobi(100);Chlorobia(100);Chlorobiales(100);SJA-28(100);unclassified(100);	0	0	0	3.00568e-06	0	0	0
Otu001675	2	Bacteria(100);Chlorobi(100);Chlorobia(100);Chlorobiales(100);SJA-28(100);unclassified(100);	0	3.00568e-06	0	0	0	3.00568e-06	0
Otu001676	2	Bacteria(100);Chlorobi(100);Chlorobia(100);Chlorobiales(100);SJA-28(100);unclassified(100);	0	0	0	6.01137e-06	0	0	0
Otu001677	2	Bacteria(100);Chlorobi(100);Chlorobia(100);Chlorobiales(100);SJA-28(100);unclassified(100);	0	0	0	0	3.00568e-06	3.00568e-06	0
Otu001678	2	Bacteria(100);Chlorobi(100);Chlorobia(100);Chlorobiales(100);SJA-28(100);unclassified(100);	0	0	0	0	3.00568e-06	0	0
Otu001679	2	Bacteria(100);Chlorobi(100);Chlorobia(100);Chlorobiales(100);SJA-28(100);unclassified(100);	0	3.00568e-06	0	0	0	0	9.01705e-06
Otu001680	2	Bacteria(100);Proteobacteria(100);Gammaproteobacteria(100);Chromatiales(100);Chromatiaceae(100);Rheinheimera(100);	0	3.00568e-06	0	0	0	0	0
Otu001681	2	Bacteria(100);Chlorobi(100);Chlorobia(100);Chlorobiales(100);SJA-28(100);unclassified(100);	0	0	0	0	3.00568e-06	0	0
Otu001682	2	Bacteria(100);Proteobacteria(100);Gammaproteobacteria(100);Chromatiales(100);Chromatiaceae(100);Rheinheimera(100);	0	0	3.00568e-06	0	0	0	0
Otu001683	2	Bacteria(100);Chlorobi(100);Chlorobia(100);Chlorobiales(100);SJA-28(100);unclassified(100);	0	0	0	0	0	3.00568e-06	0
Otu001684	2	Bacteria(100);Chlorobi(100);Chlorobia(100);Chlorobiales(100);SJA-28(100);unclassified(100);	0	0	3.00568e-06	3.00568e-06	0	0	0
Otu001685	2	Bacteria(100);Chlorobi(100);Chlorobia(100);Chlorobiales(100);SJA-28(100);unclassified(100);	0	0	0	0	6.01137e-06	0	0
Otu001686	2	Bacteria(100);Proteobacteria(100);Gammaproteobacteria(100);unclassified(100);unclassified(100);unclassified(100);	0	0	3.00568e-06	0	0	0	0
Otu001689	2	Bacteria(100);Proteobacteria(100);Gammaproteobacteria(100);Chromatiales(100);Chromatiaceae(100);Rheinheimera(100);	0	3.00568e-06	0	0	0	0	0
Otu001690	2	Bacteria(100);Proteobacteria(100);Gammaproteobacteria(100);unclassified(100);unclassified(100);unclassified(100);	0	0	3.00568e-06	0	0	0	0
Otu001692	2	Bacteria(100);Acidobacteria(100);Acidobacteria(100);Subgroup_3(100);Unknown_Family(100);Bryobacter(100);	3.00568e-06	0	0	0	3.00568e-06	0	0
Otu001693	2	Bacteria(100);Chlorobi(100);Chlorobia(100);Chlorobiales(100);SJA-28(100);unclassified(100);	0	0	0	0	0	3.00568e-06	0
Otu001694	2	Bacteria(100);Chlorobi(100);Chlorobia(100);Chlorobiales(100);SJA-28(100);unclassified(100);	3.00568e-06	0	0	0	0	3.00568e-06	0
Otu001695	2	Bacteria(100);Cyanobacteria(100);Melainabacteria(100);Obscuribacterales(100);unclassified(100);unclassified(100);	0	0	6.01137e-06	0	0	0	0
Otu001696	2	Bacteria(100);Chlorobi(100);Chlorobia(100);Chlorobiales(100);SJA-28(100);unclassified(100);	0	0	0	0	3.00568e-06	0	0
Otu001697	2	Bacteria(100);Chlorobi(100);Chlorobia(100);Chlorobiales(100);SJA-28(100);unclassified(100);	0	0	0	3.00568e-06	3.00568e-06	0	0
Otu001698	2	Bacteria(100);Chlorobi(100);Chlorobia(100);Chlorobiales(100);SJA-28(100);unclassified(100);	0	0	0	3.00568e-06	0	0	0
Otu001699	2	Bacteria(100);Acidobacteria(100);Acidobacteria(100);Subgroup_3(100);unclassified(100);unclassified(100);	0	3.00568e-06	0	0	0	0	0
Otu001700	2	Bacteria(100);Chlorobi(100);Chlorobia(100);Chlorobiales(100);SJA-28(100);unclassified(100);	0	0	0	0	0	6.01137e-06	0
Otu001701	2	Bacteria(100);Chlorobi(100);Chlorobia(100);Chlorobiales(100);SJA-28(100);unclassified(100);	0	0	0	0	0	3.00568e-06	0
Otu001702	2	Bacteria(100);Chlorobi(100);Chlorobia(100);Chlorobiales(100);SJA-28(100);unclassified(100);	0	0	0	0	3.00568e-06	3.00568e-06	0
Otu001703	2	Bacteria(100);Chlorobi(100);Chlorobia(100);Chlorobiales(100);SJA-28(100);unclassified(100);	0	0	3.00568e-06	0	0	0	0
Otu001704	2	Bacteria(100);Chlorobi(100);Chlorobia(100);Chlorobiales(100);SJA-28(100);unclassified(100);	0	0	0	0	0	3.00568e-06	0
Otu001705	2	Bacteria(100);Chlorobi(100);Chlorobia(100);Chlorobiales(100);SJA-28(100);unclassified(100);	3.00568e-06	0	0	0	0	0	0
Otu001706	2	Bacteria(100);Proteobacteria(100);Betaproteobacteria(100);unclassified(100);unclassified(100);unclassified(100);	0	3.00568e-06	3.00568e-06	0	0	0	0
Otu001707	2	Bacteria(100);Proteobacteria(100);Betaproteobacteria(100);unclassified(100);unclassified(100);unclassified(100);	3.00568e-06	0	0	3.00568e-06	0	0	0
Otu001708	2	Bacteria(100);Proteobacteria(100);Betaproteobacteria(100);unclassified(100);unclassified(100);unclassified(100);	0	0	0	0	0	3.00568e-06	0
Otu001709	2	Bacteria(100);Proteobacteria(100);Betaproteobacteria(100);unclassified(100);unclassified(100);unclassified(100);	0	0	0	0	3.00568e-06	3.00568e-06	0
Otu001710	2	Bacteria(100);Proteobacteria(100);Betaproteobacteria(100);unclassified(100);unclassified(100);unclassified(100);	0	3.00568e-06	3.00568e-06	0	0	0	0
Otu001711	2	Bacteria(100);Proteobacteria(100);Betaproteobacteria(100);unclassified(100);unclassified(100);unclassified(100);	0	0	3.00568e-06	0	0	0	0
Otu001712	2	Bacteria(100);Proteobacteria(100);Betaproteobacteria(100);unclassified(100);unclassified(100);unclassified(100);	0	0	3.00568e-06	0	3.00568e-06	0	0
Otu001713	2	Bacteria(100);Proteobacteria(100);Betaproteobacteria(100);unclassified(100);unclassified(100);unclassified(100);	0	0	3.00568e-06	0	0	0	0
Otu001714	2	Bacteria(100);Proteobacteria(100);Betaproteobacteria(100);unclassified(100);unclassified(100);unclassified(100);	0	0	3.00568e-06	3.00568e-06	0	0	0
Otu001715	2	Bacteria(100);Proteobacteria(100);Betaproteobacteria(100);unclassified(100);unclassified(100);unclassified(100);	0	0	0	6.01137e-06	0	0	0
Otu001716	2	Bacteria(100);Proteobacteria(100);Betaproteobacteria(100);unclassified(100);unclassified(100);unclassified(100);	3.00568e-06	0	0	0	0	0	0
Otu001717	2	Bacteria(100);Proteobacteria(100);Betaproteobacteria(100);unclassified(100);unclassified(100);unclassified(100);	0	0	0	3.00568e-06	0	0	0
Otu001718	2	Bacteria(100);Proteobacteria(100);Betaproteobacteria(100);unclassified(100);unclassified(100);unclassified(100);	0	0	0	0	0	3.00568e-06	9.01705e-06
Otu001719	2	Bacteria(100);Proteobacteria(100);Betaproteobacteria(100);unclassified(100);unclassified(100);unclassified(100);	0	3.00568e-06	3.00568e-06	0	0	0	0
Otu001721	2	Bacteria(100);Proteobacteria(100);Betaproteobacteria(100);unclassified(100);unclassified(100);unclassified(100);	0	0	3.00568e-06	3.00568e-06	0	0	0
Otu001722	2	Bacteria(100);Proteobacteria(100);Betaproteobacteria(100);unclassified(100);unclassified(100);unclassified(100);	0	3.00568e-06	3.00568e-06	0	0	0	0
Otu001723	2	Bacteria(100);Proteobacteria(100);Betaproteobacteria(100);unclassified(100);unclassified(100);unclassified(100);	0	0	3.00568e-06	0	0	0	0
Otu001724	2	Bacteria(100);Proteobacteria(100);Betaproteobacteria(100);unclassified(100);unclassified(100);unclassified(100);	0	0	3.00568e-06	0	0	0	0
Otu001725	2	Bacteria(100);Proteobacteria(100);Betaproteobacteria(100);unclassified(100);unclassified(100);unclassified(100);	0	0	3.00568e-06	0	0	0	0
Otu001726	2	Bacteria(100);Proteobacteria(100);Betaproteobacteria(100);unclassified(100);unclassified(100);unclassified(100);	0	0	3.00568e-06	3.00568e-06	0	0	0
Otu001727	2	Bacteria(100);Proteobacteria(100);Betaproteobacteria(100);unclassified(100);unclassified(100);unclassified(100);	0	0	3.00568e-06	3.00568e-06	0	0	0
Otu001728	2	Bacteria(100);Proteobacteria(100);Betaproteobacteria(100);unclassified(100);unclassified(100);unclassified(100);	0	0	3.00568e-06	3.00568e-06	0	0	0
Otu001729	2	Bacteria(100);Proteobacteria(100);Betaproteobacteria(100);unclassified(100);unclassified(100);unclassified(100);	0	3.00568e-06	3.00568e-06	0	0	0	0
Otu001730	2	Bacteria(100);Proteobacteria(100);Betaproteobacteria(100);unclassified(100);unclassified(100);unclassified(100);	0	0	3.00568e-06	0	0	0	0
Otu001731	2	Bacteria(100);Proteobacteria(100);Betaproteobacteria(100);unclassified(100);unclassified(100);unclassified(100);	0	0	6.01137e-06	0	0	0	0
Otu001732	2	Bacteria(100);Proteobacteria(100);Betaproteobacteria(100);unclassified(100);unclassified(100);unclassified(100);	0	0	3.00568e-06	0	0	0	0
Otu001733	2	Bacteria(100);Proteobacteria(100);Betaproteobacteria(100);unclassified(100);unclassified(100);unclassified(100);	3.00568e-06	0	3.00568e-06	0	0	0	0
Otu001734	2	Bacteria(100);Proteobacteria(100);Betaproteobacteria(100);unclassified(100);unclassified(100);unclassified(100);	0	0	0	3.00568e-06	0	0	0
Otu001736	2	Bacteria(100);Proteobacteria(100);Betaproteobacteria(100);unclassified(100);unclassified(100);unclassified(100);	0	3.00568e-06	0	3.00568e-06	0	0	0
Otu001737	2	Bacteria(100);Proteobacteria(100);Betaproteobacteria(100);unclassified(100);unclassified(100);unclassified(100);	0	6.01137e-06	0	0	0	0	0
Otu001738	2	Bacteria(100);Chlamydiae(100);Chlamydiae(100);Chlamydiales(100);Parachlamydiaceae(100);Candidatus_Protochlamydia(100);	0	6.01137e-06	0	0	0	0	0
Otu001739	2	Bacteria(100);Proteobacteria(100);Betaproteobacteria(100);unclassified(100);unclassified(100);unclassified(100);	0	0	0	0	3.00568e-06	0	0
Otu001740	2	Bacteria(100);Proteobacteria(100);Betaproteobacteria(100);unclassified(100);unclassified(100);unclassified(100);	0	0	0	3.00568e-06	0	0	0
Otu001741	2	Bacteria(100);Bacteroidetes(100);unclassified(100);unclassified(100);unclassified(100);unclassified(100);	0	0	0	3.00568e-06	0	3.00568e-06	0
Otu001742	2	Bacteria(100);Bacteroidetes(100);unclassified(100);unclassified(100);unclassified(100);unclassified(100);	0	0	0	0	0	0	9.01705e-06
Otu001743	2	Bacteria(100);Bacteroidetes(100);unclassified(100);unclassified(100);unclassified(100);unclassified(100);	3.00568e-06	0	0	0	0	0	0
Otu001744	2	Bacteria(100);Bacteroidetes(100);unclassified(100);unclassified(100);unclassified(100);unclassified(100);	0	3.00568e-06	0	0	0	0	0
Otu001745	2	Bacteria(100);Bacteroidetes(100);unclassified(100);unclassified(100);unclassified(100);unclassified(100);	3.00568e-06	0	0	0	0	0	0
Otu001746	2	Bacteria(100);Bacteroidetes(100);unclassified(100);unclassified(100);unclassified(100);unclassified(100);	3.00568e-06	0	3.00568e-06	0	0	0	0
Otu001747	2	Bacteria(100);Bacteroidetes(100);unclassified(100);unclassified(100);unclassified(100);unclassified(100);	0	0	0	3.00568e-06	0	0	0
Otu001748	2	Bacteria(100);Bacteroidetes(100);unclassified(100);unclassified(100);unclassified(100);unclassified(100);	3.00568e-06	0	0	0	0	0	0
Otu001749	2	Bacteria(100);Bacteroidetes(100);unclassified(100);unclassified(100);unclassified(100);unclassified(100);	0	0	3.00568e-06	0	0	0	0
Otu001750	2	Bacteria(100);Bacteroidetes(100);unclassified(100);unclassified(100);unclassified(100);unclassified(100);	0	3.00568e-06	0	0	0	3.00568e-06	0
Otu001751	2	Bacteria(100);Bacteroidetes(100);unclassified(100);unclassified(100);unclassified(100);unclassified(100);	3.00568e-06	0	0	0	0	0	0
Otu001752	2	Bacteria(100);Bacteroidetes(100);unclassified(100);unclassified(100);unclassified(100);unclassified(100);	0	6.01137e-06	0	0	0	0	0
Otu001753	2	Bacteria(100);Bacteroidetes(100);unclassified(100);unclassified(100);unclassified(100);unclassified(100);	0	0	0	0	0	3.00568e-06	0
Otu001754	2	Bacteria(100);Bacteroidetes(100);unclassified(100);unclassified(100);unclassified(100);unclassified(100);	6.01137e-06	0	0	0	0	0	0
Otu001755	2	Bacteria(100);Bacteroidetes(100);unclassified(100);unclassified(100);unclassified(100);unclassified(100);	3.00568e-06	0	0	3.00568e-06	0	0	0
Otu001756	2	Bacteria(100);Actinobacteria(100);Thermoleophilia(100);Solirubrobacterales(100);480-2(100);unclassified(100);	6.01137e-06	0	0	0	0	0	0
Otu001757	2	Bacteria(100);Actinobacteria(100);Thermoleophilia(100);Solirubrobacterales(100);Patulibacteraceae(100);Patulibacter(100);	0	0	0	0	0	3.00568e-06	0
Otu001758	2	Bacteria(100);Proteobacteria(100);Betaproteobacteria(100);unclassified(100);unclassified(100);unclassified(100);	0	0	0	0	0	3.00568e-06	0
Otu001759	2	Bacteria(100);Proteobacteria(100);Betaproteobacteria(100);unclassified(100);unclassified(100);unclassified(100);	0	0	0	0	0	0	0
Otu001760	2	Bacteria(100);Proteobacteria(100);Betaproteobacteria(100);unclassified(100);unclassified(100);unclassified(100);	0	0	0	0	3.00568e-06	0	0
Otu001761	2	Bacteria(100);Proteobacteria(100);Betaproteobacteria(100);unclassified(100);unclassified(100);unclassified(100);	0	0	0	0	3.00568e-06	0	0
Otu001762	2	Bacteria(100);Proteobacteria(100);Betaproteobacteria(100);unclassified(100);unclassified(100);unclassified(100);	0	0	0	0	3.00568e-06	0	0
Otu001763	2	Bacteria(100);Proteobacteria(100);Betaproteobacteria(100);unclassified(100);unclassified(100);unclassified(100);	3.00568e-06	0	0	0	0	3.00568e-06	0
Otu001764	2	Bacteria(100);Proteobacteria(100);Betaproteobacteria(100);unclassified(100);unclassified(100);unclassified(100);	3.00568e-06	3.00568e-06	0	0	0	0	0
Otu001765	2	Bacteria(100);Proteobacteria(100);Betaproteobacteria(100);unclassified(100);unclassified(100);unclassified(100);	0	3.00568e-06	0	3.00568e-06	0	0	0
Otu001766	2	Bacteria(100);Proteobacteria(100);Betaproteobacteria(100);unclassified(100);unclassified(100);unclassified(100);	0	3.00568e-06	0	3.00568e-06	0	0	0
Otu001767	2	Bacteria(100);Proteobacteria(100);Betaproteobacteria(100);unclassified(100);unclassified(100);unclassified(100);	0	0	0	3.00568e-06	3.00568e-06	0	0
Otu001768	2	Bacteria(100);Proteobacteria(100);Betaproteobacteria(100);unclassified(100);unclassified(100);unclassified(100);	0	3.00568e-06	3.00568e-06	0	0	0	0
Otu001769	2	Bacteria(100);Proteobacteria(100);Betaproteobacteria(100);unclassified(100);unclassified(100);unclassified(100);	0	0	3.00568e-06	3.00568e-06	0	0	0
Otu001770	2	Bacteria(100);Proteobacteria(100);Betaproteobacteria(100);unclassified(100);unclassified(100);unclassified(100);	0	0	3.00568e-06	0	0	0	0
Otu001771	2	Bacteria(100);Proteobacteria(100);Betaproteobacteria(100);unclassified(100);unclassified(100);unclassified(100);	3.00568e-06	0	0	0	0	0	0
Otu001772	2	Bacteria(100);Proteobacteria(100);Betaproteobacteria(100);unclassified(100);unclassified(100);unclassified(100);	0	0	6.01137e-06	0	0	0	0
Otu001774	2	Bacteria(100);Bacteroidetes(100);unclassified(100);unclassified(100);unclassified(100);unclassified(100);	3.00568e-06	3.00568e-06	0	0	0	0	0
Otu001775	2	Bacteria(100);Bacteroidetes(100);unclassified(100);unclassified(100);unclassified(100);unclassified(100);	0	0	0	0	0	0	9.01705e-06
Otu001776	2	Bacteria(100);Proteobacteria(100);Deltaproteobacteria(100);Myxococcales(100);Sandaracinaceae(100);unclassified(100);	3.00568e-06	0	3.00568e-06	0	0	0	0
Otu001777	2	Bacteria(100);Bacteroidetes(100);Sphingobacteriia(100);Sphingobacteriales(100);Chitinophagaceae(100);Flavihumibacter(100);	6.01137e-06	0	0	0	0	0	0
Otu001778	2	Bacteria(100);Proteobacteria(100);Deltaproteobacteria(100);Myxococcales(100);mle1-27(100);unclassified(100);	0	0	0	0	0	0	0
Otu001779	2	Bacteria(100);Proteobacteria(100);Alphaproteobacteria(100);Caulobacterales(100);Hyphomonadaceae(100);Woodsholea(100);	0	0	0	0	6.01137e-06	0	0
Otu001780	2	Bacteria(100);Cyanobacteria(100);Cyanobacteria(100);SubsectionIII(100);FamilyI(100);unclassified(100);	0	0	0	3.00568e-06	0	0	0
Otu001781	2	Bacteria(100);Cyanobacteria(100);Cyanobacteria(100);SubsectionIII(100);FamilyI(100);unclassified(100);	0	0	0	6.01137e-06	0	0	0
Otu001782	2	Bacteria(100);Cyanobacteria(100);Cyanobacteria(100);SubsectionIII(100);FamilyI(100);unclassified(100);	0	0	0	0	0	0	0
Otu001783	2	Bacteria(100);Cyanobacteria(100);Cyanobacteria(100);SubsectionIII(100);FamilyI(100);unclassified(100);	0	0	0	3.00568e-06	0	0	0
Otu001784	2	Bacteria(100);Cyanobacteria(100);Cyanobacteria(100);SubsectionIII(100);FamilyI(100);Leptolyngbya(100);	0	0	0	0	0	0	9.01705e-06
Otu001785	2	Bacteria(100);Cyanobacteria(100);Cyanobacteria(100);SubsectionIII(100);FamilyI(100);unclassified(100);	0	0	0	0	3.00568e-06	0	0
Otu001786	2	Bacteria(100);Cyanobacteria(100);Cyanobacteria(100);SubsectionIII(100);FamilyI(100);unclassified(100);	0	0	0	0	3.00568e-06	0	0
Otu001787	2	Bacteria(100);Cyanobacteria(100);Cyanobacteria(100);SubsectionIII(100);FamilyI(100);unclassified(100);	0	0	0	0	0	0	9.01705e-06
Otu001788	2	Bacteria(100);Cyanobacteria(100);Cyanobacteria(100);SubsectionIII(100);FamilyI(100);unclassified(100);	0	0	0	0	0	3.00568e-06	0
Otu001789	2	Bacteria(100);Cyanobacteria(100);Cyanobacteria(100);SubsectionIII(100);FamilyI(100);unclassified(100);	0	0	0	0	6.01137e-06	0	0
Otu001790	2	Bacteria(100);Cyanobacteria(100);Cyanobacteria(100);SubsectionIII(100);FamilyI(100);unclassified(100);	0	0	0	3.00568e-06	0	0	0
Otu001791	2	Bacteria(100);Cyanobacteria(100);Cyanobacteria(100);SubsectionIII(100);FamilyI(100);unclassified(100);	0	0	0	0	0	0	0
Otu001792	2	Bacteria(100);Proteobacteria(100);Betaproteobacteria(100);Burkholderiales(100);Oxalobacteraceae(100);unclassified(100);	0	0	0	0	0	6.01137e-06	0
Otu001793	2	Bacteria(100);Proteobacteria(100);Deltaproteobacteria(100);Bdellovibrionales(100);Bdellovibrionaceae(100);Bdellovibrio(100);	0	0	0	0	0	0	0
Otu001796	2	Bacteria(100);Proteobacteria(100);Deltaproteobacteria(100);Bdellovibrionales(100);Bdellovibrionaceae(100);Bdellovibrio(100);	0	0	0	0	0	3.00568e-06	0
Otu001797	2	Bacteria(100);Proteobacteria(100);Deltaproteobacteria(100);Bdellovibrionales(100);Bdellovibrionaceae(100);Bdellovibrio(100);	0	0	0	0	0	3.00568e-06	0
Otu001798	2	Bacteria(100);Proteobacteria(100);Deltaproteobacteria(100);Bdellovibrionales(100);Bdellovibrionaceae(100);Bdellovibrio(100);	0	0	0	3.00568e-06	0	3.00568e-06	0
Otu001799	2	Bacteria(100);Proteobacteria(100);Deltaproteobacteria(100);Bdellovibrionales(100);Bdellovibrionaceae(100);Bdellovibrio(100);	0	0	0	0	6.01137e-06	0	0
Otu001800	2	Bacteria(100);Proteobacteria(100);Deltaproteobacteria(100);Bdellovibrionales(100);Bdellovibrionaceae(100);Bdellovibrio(100);	0	0	0	0	6.01137e-06	0	0
Otu001801	2	Bacteria(100);Proteobacteria(100);Deltaproteobacteria(100);Bdellovibrionales(100);Bdellovibrionaceae(100);Bdellovibrio(100);	0	0	0	3.00568e-06	0	0	0
Otu001802	2	Bacteria(100);Proteobacteria(100);Deltaproteobacteria(100);Bdellovibrionales(100);Bdellovibrionaceae(100);Bdellovibrio(100);	0	0	0	6.01137e-06	0	0	0
Otu001803	2	Bacteria(100);Proteobacteria(100);Deltaproteobacteria(100);Bdellovibrionales(100);Bdellovibrionaceae(100);Bdellovibrio(100);	0	0	0	6.01137e-06	0	0	0
Otu001804	2	Bacteria(100);Nitrospirae(100);Nitrospira(100);Nitrospirales(100);Nitrospiraceae(100);Nitrospira(100);	6.01137e-06	0	0	0	0	0	0
Otu001805	2	Bacteria(100);Proteobacteria(100);Deltaproteobacteria(100);Bdellovibrionales(100);Bdellovibrionaceae(100);Bdellovibrio(100);	0	0	0	6.01137e-06	0	0	0
Otu001806	2	Bacteria(100);Bacteroidetes(100);Sphingobacteriia(100);Sphingobacteriales(100);env.OPS_17(100);unclassified(100);	6.01137e-06	0	0	0	0	0	0
Otu001807	2	Bacteria(100);Proteobacteria(100);Betaproteobacteria(100);Nitrosomonadales(100);Nitrosomonadaceae(100);Nitrosomonas(100);	3.00568e-06	0	0	0	0	0	0
Otu001808	2	Bacteria(100);Bacteroidetes(100);Cytophagia(100);unclassified(100);unclassified(100);unclassified(100);	3.00568e-06	0	0	0	0	0	0
Otu001809	2	Bacteria(100);Chloroflexi(100);TK10(100);unclassified(100);unclassified(100);unclassified(100);	6.01137e-06	0	0	0	0	0	0
Otu001810	2	Bacteria(100);Bacteroidetes(100);Cytophagia(100);unclassified(100);unclassified(100);unclassified(100);	0	0	0	0	3.00568e-06	3.00568e-06	0
Otu001811	2	Bacteria(100);Proteobacteria(100);Alphaproteobacteria(100);Caulobacterales(100);Hyphomonadaceae(100);Woodsholea(100);	0	0	0	0	3.00568e-06	3.00568e-06	0
Otu001812	2	Bacteria(100);Proteobacteria(100);Betaproteobacteria(100);unclassified(100);unclassified(100);unclassified(100);	0	0	0	0	0	3.00568e-06	0
Otu001813	2	Bacteria(100);Proteobacteria(100);Betaproteobacteria(100);unclassified(100);unclassified(100);unclassified(100);	3.00568e-06	0	0	3.00568e-06	0	0	0
Otu001814	2	Bacteria(100);Proteobacteria(100);Betaproteobacteria(100);unclassified(100);unclassified(100);unclassified(100);	0	6.01137e-06	0	0	0	0	0
Otu001815	2	Bacteria(100);Proteobacteria(100);Betaproteobacteria(100);unclassified(100);unclassified(100);unclassified(100);	0	3.00568e-06	0	0	0	3.00568e-06	0
Otu001816	2	Bacteria(100);Proteobacteria(100);Betaproteobacteria(100);unclassified(100);unclassified(100);unclassified(100);	0	3.00568e-06	0	0	0	0	0
Otu001817	2	Bacteria(100);Proteobacteria(100);Betaproteobacteria(100);unclassified(100);unclassified(100);unclassified(100);	0	0	0	3.00568e-06	0	3.00568e-06	0
Otu001818	2	Bacteria(100);Proteobacteria(100);Betaproteobacteria(100);unclassified(100);unclassified(100);unclassified(100);	0	0	0	0	3.00568e-06	0	0
Otu001819	2	Bacteria(100);Proteobacteria(100);Betaproteobacteria(100);unclassified(100);unclassified(100);unclassified(100);	0	0	0	0	0	6.01137e-06	0
Otu001820	2	Bacteria(100);Proteobacteria(100);Betaproteobacteria(100);unclassified(100);unclassified(100);unclassified(100);	3.00568e-06	0	0	3.00568e-06	0	0	0
Otu001821	2	Bacteria(100);Proteobacteria(100);Betaproteobacteria(100);unclassified(100);unclassified(100);unclassified(100);	0	3.00568e-06	0	0	0	0	0
Otu001822	2	Bacteria(100);Proteobacteria(100);Betaproteobacteria(100);unclassified(100);unclassified(100);unclassified(100);	3.00568e-06	3.00568e-06	0	0	0	0	0
Otu001823	2	Bacteria(100);Proteobacteria(100);Betaproteobacteria(100);unclassified(100);unclassified(100);unclassified(100);	0	0	0	0	3.00568e-06	3.00568e-06	0
Otu001824	2	Bacteria(100);Proteobacteria(100);Betaproteobacteria(100);unclassified(100);unclassified(100);unclassified(100);	0	0	0	3.00568e-06	0	0	0
Otu001825	2	Bacteria(100);Proteobacteria(100);Betaproteobacteria(100);unclassified(100);unclassified(100);unclassified(100);	0	0	0	0	0	0	0
Otu001826	2	Bacteria(100);Proteobacteria(100);Betaproteobacteria(100);unclassified(100);unclassified(100);unclassified(100);	0	0	0	3.00568e-06	0	0	0
Otu001827	2	Bacteria(100);Proteobacteria(100);Betaproteobacteria(100);unclassified(100);unclassified(100);unclassified(100);	0	0	3.00568e-06	3.00568e-06	0	0	0
Otu001828	2	Bacteria(100);Proteobacteria(100);Alphaproteobacteria(100);Caulobacterales(100);Caulobacteraceae(100);Phenylobacterium(100);	0	0	0	0	6.01137e-06	0	0
Otu001829	2	Bacteria(100);Proteobacteria(100);Betaproteobacteria(100);Burkholderiales(100);Comamonadaceae(100);unclassified(100);	0	0	0	0	6.01137e-06	0	0
Otu001830	2	Bacteria(100);Proteobacteria(100);Alphaproteobacteria(100);Caulobacterales(100);Hyphomonadaceae(100);Woodsholea(100);	0	3.00568e-06	0	0	0	3.00568e-06	0
Otu001831	2	Bacteria(100);Proteobacteria(100);Alphaproteobacteria(100);Caulobacterales(100);Caulobacteraceae(100);Brevundimonas(100);	3.00568e-06	0	3.00568e-06	0	0	0	0
Otu001832	2	Bacteria(100);Proteobacteria(100);Alphaproteobacteria(100);Caulobacterales(100);Hyphomonadaceae(100);Woodsholea(100);	0	0	0	6.01137e-06	0	0	0
Otu001833	2	Bacteria(100);Proteobacteria(100);Alphaproteobacteria(100);Caulobacterales(100);Hyphomonadaceae(100);Woodsholea(100);	0	3.00568e-06	0	0	0	0	0
Otu001834	2	Bacteria(100);Proteobacteria(100);Alphaproteobacteria(100);Caulobacterales(100);Hyphomonadaceae(100);Woodsholea(100);	0	0	3.00568e-06	0	0	3.00568e-06	0
Otu001835	2	Bacteria(100);Proteobacteria(100);Alphaproteobacteria(100);Caulobacterales(100);Hyphomonadaceae(100);Woodsholea(100);	0	0	0	3.00568e-06	3.00568e-06	0	0
Otu001836	2	Bacteria(100);Proteobacteria(100);Alphaproteobacteria(100);Caulobacterales(100);Hyphomonadaceae(100);Woodsholea(100);	0	0	0	3.00568e-06	0	3.00568e-06	0
Otu001837	2	Bacteria(100);Proteobacteria(100);Alphaproteobacteria(100);Caulobacterales(100);Hyphomonadaceae(100);Woodsholea(100);	0	0	0	3.00568e-06	3.00568e-06	0	0
Otu001838	2	Bacteria(100);Proteobacteria(100);Alphaproteobacteria(100);Caulobacterales(100);Caulobacteraceae(100);Brevundimonas(100);	0	0	0	0	3.00568e-06	3.00568e-06	0
Otu001839	2	Bacteria(100);Proteobacteria(100);Betaproteobacteria(100);unclassified(100);unclassified(100);unclassified(100);	0	3.00568e-06	0	0	3.00568e-06	0	0
Otu001840	2	Bacteria(100);Proteobacteria(100);Alphaproteobacteria(100);Caulobacterales(100);Hyphomonadaceae(100);Woodsholea(100);	0	0	3.00568e-06	0	3.00568e-06	0	0
Otu001841	2	Bacteria(100);Proteobacteria(100);Alphaproteobacteria(100);Caulobacterales(100);Hyphomonadaceae(100);Woodsholea(100);	0	0	0	0	3.00568e-06	0	0
Otu001842	2	Bacteria(100);Proteobacteria(100);Alphaproteobacteria(100);Caulobacterales(100);unclassified(100);unclassified(100);	6.01137e-06	0	0	0	0	0	0
Otu001843	2	Bacteria(100);Proteobacteria(100);Alphaproteobacteria(100);Caulobacterales(100);Hyphomonadaceae(100);Woodsholea(100);	0	0	0	3.00568e-06	0	0	0
Otu001844	2	Bacteria(100);Proteobacteria(100);Alphaproteobacteria(100);Caulobacterales(100);Hyphomonadaceae(100);Woodsholea(100);	0	0	0	3.00568e-06	3.00568e-06	0	0
Otu001845	2	Bacteria(100);Proteobacteria(100);Alphaproteobacteria(100);Caulobacterales(100);Hyphomonadaceae(100);Woodsholea(100);	0	0	0	0	0	3.00568e-06	0
Otu001846	2	Bacteria(100);Bacteroidetes(100);Flavobacteriia(100);Flavobacteriales(100);Flavobacteriaceae(100);unclassified(100);	3.00568e-06	0	0	3.00568e-06	0	0	0
Otu001847	2	Bacteria(100);Proteobacteria(100);Betaproteobacteria(100);Burkholderiales(100);Burkholderiaceae(100);Lautropia(100);	0	6.01137e-06	0	0	0	0	0
Otu001848	2	Bacteria(100);Actinobacteria(100);Actinobacteria(100);Corynebacteriales(100);Nocardiaceae(100);Gordonia(100);	3.00568e-06	0	0	0	0	0	0
Otu001849	2	Bacteria(100);Actinobacteria(100);Actinobacteria(100);Corynebacteriales(100);Corynebacteriaceae(100);Corynebacterium(100);	0	0	0	0	0	0	0
Otu001850	2	Bacteria(100);Cyanobacteria(100);Cyanobacteria(100);unclassified(100);unclassified(100);unclassified(100);	0	0	0	0	0	0	0
Otu001851	2	Bacteria(100);Cyanobacteria(100);Cyanobacteria(100);unclassified(100);unclassified(100);unclassified(100);	0	0	0	3.00568e-06	0	0	0
Otu001852	2	Bacteria(100);Planctomycetes(100);Planctomycetacia(100);Planctomycetales(100);Planctomycetaceae(100);Gemmata(100);	0	0	0	6.01137e-06	0	0	0
Otu001853	2	Bacteria(100);Cyanobacteria(100);Cyanobacteria(100);unclassified(100);unclassified(100);unclassified(100);	0	0	0	0	0	0	9.01705e-06
Otu001854	2	Bacteria(100);Proteobacteria(100);Betaproteobacteria(100);Burkholderiales(100);Comamonadaceae(100);unclassified(100);	0	0	3.00568e-06	0	3.00568e-06	0	0
Otu001855	2	Bacteria(100);Proteobacteria(100);Betaproteobacteria(100);Burkholderiales(100);Comamonadaceae(100);unclassified(100);	0	3.00568e-06	0	0	0	0	0
Otu001856	2	Bacteria(100);Proteobacteria(100);Betaproteobacteria(100);Burkholderiales(100);Comamonadaceae(100);unclassified(100);	0	0	0	0	3.00568e-06	0	0
Otu001857	2	Bacteria(100);Proteobacteria(100);Betaproteobacteria(100);Burkholderiales(100);Comamonadaceae(100);unclassified(100);	3.00568e-06	3.00568e-06	0	0	0	0	0
Otu001858	2	Bacteria(100);Proteobacteria(100);Betaproteobacteria(100);Burkholderiales(100);Comamonadaceae(100);unclassified(100);	0	0	0	0	3.00568e-06	0	0
Otu001859	2	Bacteria(100);Proteobacteria(100);Betaproteobacteria(100);Burkholderiales(100);Comamonadaceae(100);unclassified(100);	0	0	0	6.01137e-06	0	0	0
Otu001860	2	Bacteria(100);Proteobacteria(100);Betaproteobacteria(100);Burkholderiales(100);Comamonadaceae(100);unclassified(100);	0	0	6.01137e-06	0	0	0	0
Otu001861	2	Bacteria(100);Proteobacteria(100);Betaproteobacteria(100);Burkholderiales(100);Comamonadaceae(100);unclassified(100);	6.01137e-06	0	0	0	0	0	0
Otu001863	2	Bacteria(100);Bacteroidetes(100);Flavobacteriia(100);Flavobacteriales(100);Flavobacteriaceae(100);Flavobacterium(100);	0	3.00568e-06	0	3.00568e-06	0	0	0
Otu001864	2	Bacteria(100);Bacteroidetes(100);Flavobacteriia(100);Flavobacteriales(100);Flavobacteriaceae(100);Myroides(100);	3.00568e-06	0	0	0	0	0	0
Otu001865	2	Bacteria(100);Bacteroidetes(100);Flavobacteriia(100);Flavobacteriales(100);Flavobacteriaceae(100);unclassified(100);	3.00568e-06	0	0	0	0	0	0
Otu001866	2	Bacteria(100);Bacteroidetes(100);Flavobacteriia(100);Flavobacteriales(100);Flavobacteriaceae(100);Flavobacterium(100);	3.00568e-06	3.00568e-06	0	0	0	0	0
Otu001867	2	Bacteria(100);Bacteroidetes(100);Flavobacteriia(100);Flavobacteriales(100);Flavobacteriaceae(100);Cruoricaptor(100);	0	0	0	3.00568e-06	0	3.00568e-06	0
Otu001868	2	Bacteria(100);Bacteroidetes(100);Flavobacteriia(100);Flavobacteriales(100);Flavobacteriaceae(100);unclassified(100);	3.00568e-06	0	0	0	0	3.00568e-06	0
Otu001869	2	Bacteria(100);Bacteroidetes(100);Flavobacteriia(100);Flavobacteriales(100);Flavobacteriaceae(100);Flavobacterium(100);	6.01137e-06	0	0	0	0	0	0
Otu001870	2	Bacteria(100);Bacteroidetes(100);Flavobacteriia(100);Flavobacteriales(100);Flavobacteriaceae(100);unclassified(100);	6.01137e-06	0	0	0	0	0	0
Otu001871	2	Bacteria(100);Bacteroidetes(100);Flavobacteriia(100);Flavobacteriales(100);Flavobacteriaceae(100);Flavobacterium(100);	0	3.00568e-06	0	3.00568e-06	0	0	0
Otu001873	2	Bacteria(100);Bacteroidetes(100);Flavobacteriia(100);Flavobacteriales(100);Flavobacteriaceae(100);unclassified(100);	0	6.01137e-06	0	0	0	0	0
Otu001874	2	Bacteria(100);Bacteroidetes(100);Flavobacteriia(100);Flavobacteriales(100);Flavobacteriaceae(100);unclassified(100);	0	6.01137e-06	0	0	0	0	0
Otu001875	2	Bacteria(100);Bacteroidetes(100);Flavobacteriia(100);Flavobacteriales(100);Flavobacteriaceae(100);unclassified(100);	3.00568e-06	0	0	0	0	0	0
Otu001876	2	Bacteria(100);Bacteroidetes(100);Flavobacteriia(100);Flavobacteriales(100);Flavobacteriaceae(100);Flavobacterium(100);	3.00568e-06	3.00568e-06	0	0	0	0	0
Otu001877	2	Bacteria(100);Bacteroidetes(100);Flavobacteriia(100);Flavobacteriales(100);Flavobacteriaceae(100);unclassified(100);	6.01137e-06	0	0	0	0	0	0
Otu001878	2	Bacteria(100);Bacteroidetes(100);Flavobacteriia(100);Flavobacteriales(100);Flavobacteriaceae(100);unclassified(100);	3.00568e-06	0	0	0	0	0	0
Otu001879	2	Bacteria(100);Bacteroidetes(100);Flavobacteriia(100);Flavobacteriales(100);Flavobacteriaceae(100);Cruoricaptor(100);	0	0	3.00568e-06	0	0	0	0
Otu001880	2	Bacteria(100);Bacteroidetes(100);Flavobacteriia(100);Flavobacteriales(100);unclassified(100);unclassified(100);	3.00568e-06	3.00568e-06	0	0	0	0	0
Otu001881	2	Bacteria(100);Proteobacteria(100);Betaproteobacteria(100);Burkholderiales(100);Comamonadaceae(100);unclassified(100);	0	0	0	0	3.00568e-06	0	0
Otu001882	2	Bacteria(100);Proteobacteria(100);Betaproteobacteria(100);Burkholderiales(100);Comamonadaceae(100);unclassified(100);	3.00568e-06	0	0	0	0	0	0
Otu001883	2	Bacteria(100);Proteobacteria(100);Betaproteobacteria(100);Burkholderiales(100);Comamonadaceae(100);unclassified(100);	0	3.00568e-06	0	0	0	0	0
Otu001884	2	Bacteria(100);Proteobacteria(100);Betaproteobacteria(100);Burkholderiales(100);unclassified(100);unclassified(100);	0	0	3.00568e-06	0	0	0	0
Otu001885	2	Bacteria(100);Proteobacteria(100);Betaproteobacteria(100);Burkholderiales(100);Comamonadaceae(100);unclassified(100);	0	0	3.00568e-06	0	0	0	0
Otu001886	2	Bacteria(100);Proteobacteria(100);Betaproteobacteria(100);Burkholderiales(100);Comamonadaceae(100);unclassified(100);	0	0	3.00568e-06	0	0	0	0
Otu001887	2	Bacteria(100);Proteobacteria(100);Betaproteobacteria(100);Burkholderiales(100);Comamonadaceae(100);unclassified(100);	0	3.00568e-06	0	0	0	0	0
Otu001888	2	Bacteria(100);Proteobacteria(100);Betaproteobacteria(100);Burkholderiales(100);Comamonadaceae(100);unclassified(100);	0	0	3.00568e-06	3.00568e-06	0	0	0
Otu001889	2	Bacteria(100);Proteobacteria(100);Betaproteobacteria(100);Burkholderiales(100);unclassified(100);unclassified(100);	0	0	3.00568e-06	0	0	0	0
Otu001890	2	Bacteria(100);Proteobacteria(100);Betaproteobacteria(100);Burkholderiales(100);Comamonadaceae(100);unclassified(100);	3.00568e-06	0	0	3.00568e-06	0	0	0
Otu001891	2	Bacteria(100);Proteobacteria(100);Betaproteobacteria(100);Burkholderiales(100);Comamonadaceae(100);Inhella(100);	0	0	0	0	3.00568e-06	0	0
Otu001892	2	Bacteria(100);Planctomycetes(100);Planctomycetacia(100);Planctomycetales(100);Planctomycetaceae(100);Planctomyces(100);	0	0	0	0	3.00568e-06	0	0
Otu001893	2	Bacteria(100);Proteobacteria(100);Alphaproteobacteria(100);Rhodospirillales(100);DA111(100);unclassified(100);	6.01137e-06	0	0	0	0	0	0
Otu001894	2	Bacteria(100);Proteobacteria(100);Alphaproteobacteria(100);Rhodospirillales(100);unclassified(100);unclassified(100);	6.01137e-06	0	0	0	0	0	0
Otu001895	2	Bacteria(100);Proteobacteria(100);Alphaproteobacteria(100);Rhodospirillales(100);B79(100);unclassified(100);	6.01137e-06	0	0	0	0	0	0
Otu001896	2	Bacteria(100);Proteobacteria(100);TA18(100);unclassified(100);unclassified(100);unclassified(100);	3.00568e-06	3.00568e-06	0	0	0	0	0
Otu001897	2	Bacteria(100);Proteobacteria(100);Alphaproteobacteria(100);Rhodospirillales(100);Rhodospirillaceae(100);Magnetospirillum(100);	6.01137e-06	0	0	0	0	0	0
Otu001898	2	Bacteria(100);Proteobacteria(100);Betaproteobacteria(100);Burkholderiales(100);Comamonadaceae(100);Ideonella(100);	0	0	0	3.00568e-06	3.00568e-06	0	0
Otu001899	2	Bacteria(100);Proteobacteria(100);Betaproteobacteria(100);Burkholderiales(100);Comamonadaceae(100);unclassified(100);	0	0	0	0	3.00568e-06	0	9.01705e-06
Otu001900	2	Bacteria(100);Proteobacteria(100);Betaproteobacteria(100);Burkholderiales(100);Comamonadaceae(100);unclassified(100);	0	0	0	3.00568e-06	0	0	0
Otu001901	2	Bacteria(100);Planctomycetes(100);OM190(100);unclassified(100);unclassified(100);unclassified(100);	0	0	0	0	0	0	0
Otu001902	2	Bacteria(100);Proteobacteria(100);Betaproteobacteria(100);Burkholderiales(100);Comamonadaceae(100);unclassified(100);	3.00568e-06	0	3.00568e-06	0	0	0	0
Otu001903	2	Bacteria(100);Proteobacteria(100);Betaproteobacteria(100);Burkholderiales(100);Comamonadaceae(100);Inhella(100);	0	6.01137e-06	0	0	0	0	0
Otu001904	2	Bacteria(100);Proteobacteria(100);Betaproteobacteria(100);Burkholderiales(100);Comamonadaceae(100);unclassified(100);	0	0	0	0	3.00568e-06	3.00568e-06	0
Otu001905	2	Bacteria(100);Proteobacteria(100);Betaproteobacteria(100);Burkholderiales(100);Comamonadaceae(100);Inhella(100);	0	0	6.01137e-06	0	0	0	0
Otu001906	2	Bacteria(100);Proteobacteria(100);Betaproteobacteria(100);Burkholderiales(100);Comamonadaceae(100);unclassified(100);	0	0	3.00568e-06	0	0	3.00568e-06	0
Otu001907	2	Bacteria(100);Proteobacteria(100);Betaproteobacteria(100);Burkholderiales(100);Comamonadaceae(100);Rubrivivax(100);	0	3.00568e-06	0	0	3.00568e-06	0	0
Otu001908	2	Bacteria(100);Proteobacteria(100);Betaproteobacteria(100);Burkholderiales(100);Comamonadaceae(100);unclassified(100);	3.00568e-06	0	0	0	0	0	0
Otu001909	2	Bacteria(100);Proteobacteria(100);Betaproteobacteria(100);Burkholderiales(100);Comamonadaceae(100);unclassified(100);	0	3.00568e-06	3.00568e-06	0	0	0	0
Otu001910	2	Bacteria(100);Proteobacteria(100);Betaproteobacteria(100);Burkholderiales(100);Comamonadaceae(100);unclassified(100);	0	0	0	0	6.01137e-06	0	0
Otu001911	2	Bacteria(100);Proteobacteria(100);Betaproteobacteria(100);Burkholderiales(100);Comamonadaceae(100);unclassified(100);	0	0	0	0	3.00568e-06	0	0
Otu001912	2	Bacteria(100);Proteobacteria(100);Betaproteobacteria(100);Burkholderiales(100);Comamonadaceae(100);unclassified(100);	0	3.00568e-06	3.00568e-06	0	0	0	0
Otu001913	2	Bacteria(100);Proteobacteria(100);Betaproteobacteria(100);Rhodocyclales(100);Rhodocyclaceae(100);unclassified(100);	0	0	0	0	0	0	9.01705e-06
Otu001914	2	Bacteria(100);Proteobacteria(100);Betaproteobacteria(100);Burkholderiales(100);Comamonadaceae(100);unclassified(100);	0	0	0	0	0	0	0
Otu001915	2	Bacteria(100);Proteobacteria(100);Betaproteobacteria(100);Burkholderiales(100);Comamonadaceae(100);unclassified(100);	3.00568e-06	3.00568e-06	0	0	0	0	0
Otu001916	2	Bacteria(100);Bacteroidetes(100);Sphingobacteriia(100);Sphingobacteriales(100);Chitinophagaceae(100);unclassified(100);	0	0	0	0	0	0	9.01705e-06
Otu001917	2	Bacteria(100);Proteobacteria(100);Alphaproteobacteria(100);Rhizobiales(100);Hyphomicrobiaceae(100);Hyphomicrobium(100);	3.00568e-06	0	0	0	0	0	0
Otu001918	2	Bacteria(100);Proteobacteria(100);Alphaproteobacteria(100);Rhizobiales(100);Rhizobiaceae(100);Rhizobium(100);	0	0	0	0	0	0	0
Otu001919	2	Bacteria(100);Bacteroidetes(100);Sphingobacteriia(100);Sphingobacteriales(100);unclassified(100);unclassified(100);	6.01137e-06	0	0	0	0	0	0
Otu001920	2	Bacteria(100);Chlorobi(100);Chlorobia(100);Chlorobiales(100);OPB56(100);unclassified(100);	0	0	0	0	0	0	9.01705e-06
Otu001921	2	Bacteria(100);Proteobacteria(100);Betaproteobacteria(100);unclassified(100);unclassified(100);unclassified(100);	0	0	0	3.00568e-06	0	0	0
Otu001922	2	Bacteria(100);Proteobacteria(100);Alphaproteobacteria(100);Rhizobiales(100);Phyllobacteriaceae(100);unclassified(100);	3.00568e-06	0	0	0	0	0	0
Otu001923	2	Bacteria(100);Proteobacteria(100);Betaproteobacteria(100);unclassified(100);unclassified(100);unclassified(100);	0	0	6.01137e-06	0	0	0	0
Otu001924	2	Bacteria(100);Proteobacteria(100);Betaproteobacteria(100);Rhodocyclales(100);Rhodocyclaceae(100);unclassified(100);	0	0	0	6.01137e-06	0	0	0
Otu001926	2	Bacteria(100);Proteobacteria(100);Alphaproteobacteria(100);unclassified(100);unclassified(100);unclassified(100);	3.00568e-06	0	0	0	0	0	0
Otu001927	2	Bacteria(100);Proteobacteria(100);Alphaproteobacteria(100);unclassified(100);unclassified(100);unclassified(100);	0	0	0	3.00568e-06	0	0	0
Otu001928	2	Bacteria(100);Proteobacteria(100);Alphaproteobacteria(100);unclassified(100);unclassified(100);unclassified(100);	0	0	3.00568e-06	0	0	0	0
Otu001929	2	Bacteria(100);Proteobacteria(100);Alphaproteobacteria(100);unclassified(100);unclassified(100);unclassified(100);	0	0	3.00568e-06	3.00568e-06	0	0	0
Otu001930	2	Bacteria(100);Proteobacteria(100);Alphaproteobacteria(100);unclassified(100);unclassified(100);unclassified(100);	0	0	0	3.00568e-06	0	3.00568e-06	0
Otu001931	2	Bacteria(100);Proteobacteria(100);Alphaproteobacteria(100);unclassified(100);unclassified(100);unclassified(100);	0	0	0	0	3.00568e-06	0	0
Otu001932	2	Bacteria(100);Proteobacteria(100);Alphaproteobacteria(100);unclassified(100);unclassified(100);unclassified(100);	0	3.00568e-06	0	3.00568e-06	0	0	0
Otu001933	2	Bacteria(100);Bacteroidetes(100);unclassified(100);unclassified(100);unclassified(100);unclassified(100);	6.01137e-06	0	0	0	0	0	0
Otu001934	2	Bacteria(100);Proteobacteria(100);Betaproteobacteria(100);Burkholderiales(100);Burkholderiaceae(100);Lautropia(100);	0	0	0	0	0	3.00568e-06	0
Otu001935	2	Bacteria(100);Bacteroidetes(100);unclassified(100);unclassified(100);unclassified(100);unclassified(100);	0	0	0	0	0	6.01137e-06	0
Otu001936	2	Bacteria(100);Proteobacteria(100);Deltaproteobacteria(100);Bdellovibrionales(100);Bdellovibrionaceae(100);Bdellovibrio(100);	0	0	0	0	0	0	0
Otu001937	2	Bacteria(100);Proteobacteria(100);Deltaproteobacteria(100);Bdellovibrionales(100);Bdellovibrionaceae(100);Bdellovibrio(100);	0	0	0	0	0	0	0
Otu001938	2	Bacteria(100);Proteobacteria(100);Deltaproteobacteria(100);Bdellovibrionales(100);Bdellovibrionaceae(100);Bdellovibrio(100);	3.00568e-06	0	0	0	0	0	0
Otu001939	2	Bacteria(100);Proteobacteria(100);Deltaproteobacteria(100);Bdellovibrionales(100);Bdellovibrionaceae(100);Bdellovibrio(100);	0	0	0	0	0	3.00568e-06	0
Otu001940	2	Bacteria(100);Proteobacteria(100);Betaproteobacteria(100);Rhodocyclales(100);Rhodocyclaceae(100);unclassified(100);	0	0	3.00568e-06	0	0	0	0
Otu001941	2	Bacteria(100);Firmicutes(100);Bacilli(100);Lactobacillales(100);Streptococcaceae(100);Streptococcus(100);	6.01137e-06	0	0	0	0	0	0
Otu001942	2	Bacteria(100);Chloroflexi(100);unclassified(100);unclassified(100);unclassified(100);unclassified(100);	0	0	0	0	3.00568e-06	0	9.01705e-06
Otu001943	2	Bacteria(100);Proteobacteria(100);Alphaproteobacteria(100);unclassified(100);unclassified(100);unclassified(100);	3.00568e-06	0	0	0	0	0	0
Otu001946	2	Bacteria(100);Proteobacteria(100);Alphaproteobacteria(100);Rhizobiales(100);Brucellaceae(100);unclassified(100);	0	0	0	0	3.00568e-06	3.00568e-06	0
Otu001947	2	Bacteria(100);Proteobacteria(100);Alphaproteobacteria(100);Rhizobiales(100);Methylobacteriaceae(100);Meganema(100);	0	0	0	0	3.00568e-06	0	9.01705e-06
Otu001948	2	Bacteria(100);Proteobacteria(100);Alphaproteobacteria(100);Rhizobiales(100);Methylobacteriaceae(100);Meganema(100);	0	0	0	0	0	0	0
Otu001949	2	Bacteria(100);Proteobacteria(100);Alphaproteobacteria(100);Rhizobiales(100);Methylobacteriaceae(100);Meganema(100);	0	0	3.00568e-06	0	0	0	0
Otu001950	2	Bacteria(100);Proteobacteria(100);Alphaproteobacteria(100);Rhizobiales(100);unclassified(100);unclassified(100);	3.00568e-06	0	0	0	0	0	0
Otu001951	2	Bacteria(100);Bacteroidetes(100);Flavobacteriia(100);Flavobacteriales(100);Flavobacteriaceae(100);Flavobacterium(100);	0	0	0	3.00568e-06	0	0	0
Otu001952	2	Bacteria(100);Bacteroidetes(100);Flavobacteriia(100);Flavobacteriales(100);Flavobacteriaceae(100);Elizabethkingia(100);	0	0	0	3.00568e-06	0	0	0
Otu001953	2	Bacteria(100);Bacteroidetes(100);Flavobacteriia(100);Flavobacteriales(100);Flavobacteriaceae(100);Cruoricaptor(100);	3.00568e-06	0	0	0	0	0	0
Otu001954	2	Bacteria(100);Bacteroidetes(100);Flavobacteriia(100);Flavobacteriales(100);Flavobacteriaceae(100);unclassified(100);	3.00568e-06	0	0	0	0	0	0
Otu001955	2	Bacteria(100);Proteobacteria(100);Alphaproteobacteria(100);unclassified(100);unclassified(100);unclassified(100);	0	0	6.01137e-06	0	0	0	0
Otu001956	2	Bacteria(100);Bacteroidetes(100);Flavobacteriia(100);Flavobacteriales(100);Flavobacteriaceae(100);unclassified(100);	3.00568e-06	3.00568e-06	0	0	0	0	0
Otu001957	2	Bacteria(100);Bacteroidetes(100);Flavobacteriia(100);Flavobacteriales(100);Flavobacteriaceae(100);Flavobacterium(100);	3.00568e-06	0	0	0	0	0	0
Otu001958	2	Bacteria(100);Proteobacteria(100);Alphaproteobacteria(100);unclassified(100);unclassified(100);unclassified(100);	0	0	0	3.00568e-06	0	0	0
Otu001959	2	Bacteria(100);Bacteroidetes(100);Flavobacteriia(100);Flavobacteriales(100);Flavobacteriaceae(100);Flavobacterium(100);	0	0	3.00568e-06	0	0	3.00568e-06	0
Otu001961	2	Bacteria(100);Bacteroidetes(100);Flavobacteriia(100);Flavobacteriales(100);Flavobacteriaceae(100);Flavobacterium(100);	0	3.00568e-06	0	0	0	0	0
Otu001962	2	Bacteria(100);Bacteroidetes(100);Flavobacteriia(100);Flavobacteriales(100);Flavobacteriaceae(100);unclassified(100);	3.00568e-06	0	0	3.00568e-06	0	0	0
Otu001963	2	Bacteria(100);Bacteroidetes(100);Flavobacteriia(100);Flavobacteriales(100);Flavobacteriaceae(100);unclassified(100);	3.00568e-06	0	0	0	3.00568e-06	0	0
Otu001964	2	Bacteria(100);Bacteroidetes(100);Flavobacteriia(100);Flavobacteriales(100);Flavobacteriaceae(100);Flavobacterium(100);	0	3.00568e-06	0	3.00568e-06	0	0	0
Otu001965	2	Bacteria(100);Bacteroidetes(100);Flavobacteriia(100);Flavobacteriales(100);Flavobacteriaceae(100);Flavobacterium(100);	0	0	3.00568e-06	0	0	3.00568e-06	0
Otu001966	2	Bacteria(100);Bacteroidetes(100);Flavobacteriia(100);Flavobacteriales(100);Flavobacteriaceae(100);unclassified(100);	3.00568e-06	0	0	0	0	0	0
Otu001967	2	Bacteria(100);Bacteroidetes(100);Flavobacteriia(100);Flavobacteriales(100);Flavobacteriaceae(100);Flavobacterium(100);	0	3.00568e-06	0	3.00568e-06	0	0	0
Otu001968	2	Bacteria(100);Proteobacteria(100);Alphaproteobacteria(100);unclassified(100);unclassified(100);unclassified(100);	0	0	3.00568e-06	0	3.00568e-06	0	0
Otu001969	2	Bacteria(100);Proteobacteria(100);Alphaproteobacteria(100);unclassified(100);unclassified(100);unclassified(100);	3.00568e-06	3.00568e-06	0	0	0	0	0
Otu001970	2	Bacteria(100);Proteobacteria(100);Alphaproteobacteria(100);unclassified(100);unclassified(100);unclassified(100);	0	0	0	3.00568e-06	3.00568e-06	0	0
Otu001971	2	Bacteria(100);Proteobacteria(100);Alphaproteobacteria(100);unclassified(100);unclassified(100);unclassified(100);	0	0	0	6.01137e-06	0	0	0
Otu001972	2	Bacteria(100);Proteobacteria(100);Alphaproteobacteria(100);unclassified(100);unclassified(100);unclassified(100);	0	0	0	0	6.01137e-06	0	0
Otu001973	2	Bacteria(100);Proteobacteria(100);Alphaproteobacteria(100);unclassified(100);unclassified(100);unclassified(100);	6.01137e-06	0	0	0	0	0	0
Otu001974	2	Bacteria(100);Proteobacteria(100);Alphaproteobacteria(100);unclassified(100);unclassified(100);unclassified(100);	0	0	0	0	0	3.00568e-06	0
Otu001975	2	Bacteria(100);Proteobacteria(100);Alphaproteobacteria(100);unclassified(100);unclassified(100);unclassified(100);	0	0	0	0	0	3.00568e-06	0
Otu001976	2	Bacteria(100);Proteobacteria(100);Alphaproteobacteria(100);unclassified(100);unclassified(100);unclassified(100);	0	0	0	0	3.00568e-06	0	0
Otu001977	2	Bacteria(100);Bacteroidetes(100);unclassified(100);unclassified(100);unclassified(100);unclassified(100);	0	0	0	0	0	0	0
Otu001978	2	Bacteria(100);Proteobacteria(100);Alphaproteobacteria(100);unclassified(100);unclassified(100);unclassified(100);	0	0	6.01137e-06	0	0	0	0
Otu001979	2	Bacteria(100);Proteobacteria(100);Alphaproteobacteria(100);unclassified(100);unclassified(100);unclassified(100);	0	0	0	6.01137e-06	0	0	0
Otu001980	2	Bacteria(100);Proteobacteria(100);Alphaproteobacteria(100);unclassified(100);unclassified(100);unclassified(100);	0	0	0	0	3.00568e-06	0	0
Otu001981	2	Bacteria(100);Proteobacteria(100);Alphaproteobacteria(100);unclassified(100);unclassified(100);unclassified(100);	0	0	0	3.00568e-06	0	0	0
Otu001982	2	Bacteria(100);Proteobacteria(100);Alphaproteobacteria(100);unclassified(100);unclassified(100);unclassified(100);	0	0	0	0	3.00568e-06	3.00568e-06	0
Otu001983	2	Bacteria(100);Bacteroidetes(100);Flavobacteriia(100);Flavobacteriales(100);Flavobacteriaceae(100);Flavobacterium(100);	3.00568e-06	0	0	3.00568e-06	0	0	0
Otu001984	2	Bacteria(100);Bacteroidetes(100);Flavobacteriia(100);Flavobacteriales(100);Flavobacteriaceae(100);Flavobacterium(100);	0	0	3.00568e-06	0	0	3.00568e-06	0
Otu001985	2	Bacteria(100);Bacteroidetes(100);Flavobacteriia(100);Flavobacteriales(100);Flavobacteriaceae(100);Cloacibacterium(100);	0	3.00568e-06	0	0	0	0	0
Otu001986	2	Bacteria(100);Bacteroidetes(100);Flavobacteriia(100);Flavobacteriales(100);Flavobacteriaceae(100);Cruoricaptor(100);	0	0	0	6.01137e-06	0	0	0
Otu001987	2	Bacteria(100);Bacteroidetes(100);Sphingobacteriia(100);Sphingobacteriales(100);Chitinophagaceae(100);Ferruginibacter(100);	6.01137e-06	0	0	0	0	0	0
Otu001988	2	Bacteria(100);Proteobacteria(100);Betaproteobacteria(100);Rhodocyclales(100);Rhodocyclaceae(100);unclassified(100);	0	0	0	3.00568e-06	0	0	0
Otu001989	2	Bacteria(100);Proteobacteria(100);Betaproteobacteria(100);Rhodocyclales(100);Rhodocyclaceae(100);unclassified(100);	0	0	0	3.00568e-06	0	0	0
Otu001990	2	Bacteria(100);Proteobacteria(100);Betaproteobacteria(100);Rhodocyclales(100);Rhodocyclaceae(100);unclassified(100);	0	0	3.00568e-06	0	3.00568e-06	0	0
Otu001991	2	Bacteria(100);Proteobacteria(100);Betaproteobacteria(100);Rhodocyclales(100);Rhodocyclaceae(100);unclassified(100);	0	0	3.00568e-06	3.00568e-06	0	0	0
Otu001992	2	Bacteria(100);Proteobacteria(100);Betaproteobacteria(100);Rhodocyclales(100);Rhodocyclaceae(100);unclassified(100);	0	0	0	0	0	3.00568e-06	0
Otu001993	2	Bacteria(100);Proteobacteria(100);Betaproteobacteria(100);Rhodocyclales(100);Rhodocyclaceae(100);unclassified(100);	3.00568e-06	0	0	3.00568e-06	0	0	0
Otu001994	2	Bacteria(100);Proteobacteria(100);Betaproteobacteria(100);Rhodocyclales(100);Rhodocyclaceae(100);unclassified(100);	0	0	0	0	0	3.00568e-06	0
Otu001995	2	Bacteria(100);Proteobacteria(100);Betaproteobacteria(100);Rhodocyclales(100);Rhodocyclaceae(100);Dechloromonas(100);	0	0	3.00568e-06	0	0	3.00568e-06	0
Otu001996	2	Bacteria(100);Proteobacteria(100);Betaproteobacteria(100);Rhodocyclales(100);Rhodocyclaceae(100);unclassified(100);	0	0	6.01137e-06	0	0	0	0
Otu001997	2	Bacteria(100);Proteobacteria(100);Betaproteobacteria(100);Rhodocyclales(100);Rhodocyclaceae(100);unclassified(100);	0	3.00568e-06	0	3.00568e-06	0	0	0
Otu001998	2	Bacteria(100);Proteobacteria(100);Betaproteobacteria(100);Rhodocyclales(100);Rhodocyclaceae(100);unclassified(100);	0	0	3.00568e-06	3.00568e-06	0	0	0
Otu001999	2	Bacteria(100);Proteobacteria(100);Betaproteobacteria(100);Rhodocyclales(100);Rhodocyclaceae(100);unclassified(100);	3.00568e-06	0	3.00568e-06	0	0	0	0
Otu002000	2	Bacteria(100);Proteobacteria(100);Betaproteobacteria(100);Rhodocyclales(100);Rhodocyclaceae(100);unclassified(100);	0	0	3.00568e-06	3.00568e-06	0	0	0
Otu002001	2	Bacteria(100);Proteobacteria(100);Betaproteobacteria(100);Rhodocyclales(100);Rhodocyclaceae(100);unclassified(100);	0	3.00568e-06	0	0	3.00568e-06	0	0
Otu002002	2	Bacteria(100);Proteobacteria(100);Betaproteobacteria(100);Rhodocyclales(100);Rhodocyclaceae(100);unclassified(100);	0	0	0	3.00568e-06	3.00568e-06	0	0
Otu002003	2	Bacteria(100);Proteobacteria(100);Betaproteobacteria(100);Rhodocyclales(100);Rhodocyclaceae(100);Candidatus_Accumulibacter(100);	3.00568e-06	0	3.00568e-06	0	0	0	0
Otu002004	2	Bacteria(100);Proteobacteria(100);Betaproteobacteria(100);Rhodocyclales(100);Rhodocyclaceae(100);Candidatus_Accumulibacter(100);	0	0	3.00568e-06	0	0	0	0
Otu002005	2	Bacteria(100);Proteobacteria(100);Betaproteobacteria(100);Rhodocyclales(100);Rhodocyclaceae(100);unclassified(100);	0	0	0	0	3.00568e-06	0	9.01705e-06
Otu002006	2	Bacteria(100);Proteobacteria(100);Betaproteobacteria(100);Rhodocyclales(100);Rhodocyclaceae(100);unclassified(100);	0	0	0	3.00568e-06	0	0	0
Otu002008	2	Bacteria(100);Proteobacteria(100);Betaproteobacteria(100);Rhodocyclales(100);Rhodocyclaceae(100);Candidatus_Accumulibacter(100);	0	0	0	6.01137e-06	0	0	0
Otu002009	2	Bacteria(100);Proteobacteria(100);Betaproteobacteria(100);Rhodocyclales(100);Rhodocyclaceae(100);Candidatus_Accumulibacter(100);	0	0	3.00568e-06	3.00568e-06	0	0	0
Otu002010	2	Bacteria(100);Proteobacteria(100);Betaproteobacteria(100);Rhodocyclales(100);Rhodocyclaceae(100);unclassified(100);	0	0	0	3.00568e-06	3.00568e-06	0	0
Otu002011	2	Bacteria(100);Proteobacteria(100);Betaproteobacteria(100);Rhodocyclales(100);Rhodocyclaceae(100);unclassified(100);	0	3.00568e-06	0	0	3.00568e-06	0	0
Otu002012	2	Bacteria(100);Proteobacteria(100);Betaproteobacteria(100);Rhodocyclales(100);Rhodocyclaceae(100);unclassified(100);	0	0	0	0	0	3.00568e-06	0
Otu002013	2	Bacteria(100);Proteobacteria(100);Betaproteobacteria(100);Rhodocyclales(100);Rhodocyclaceae(100);unclassified(100);	0	3.00568e-06	0	3.00568e-06	0	0	0
Otu002014	2	Bacteria(100);Proteobacteria(100);Gammaproteobacteria(100);Xanthomonadales(100);Xanthomonadaceae(100);Pseudoxanthomonas(100);	3.00568e-06	0	0	0	0	3.00568e-06	0
Otu002015	2	Bacteria(100);Proteobacteria(100);Betaproteobacteria(100);Rhodocyclales(100);Rhodocyclaceae(100);unclassified(100);	0	0	0	3.00568e-06	0	3.00568e-06	0
Otu002016	2	Bacteria(100);Proteobacteria(100);Betaproteobacteria(100);Rhodocyclales(100);Rhodocyclaceae(100);unclassified(100);	3.00568e-06	0	0	0	0	0	0
Otu002017	2	Bacteria(100);Proteobacteria(100);Betaproteobacteria(100);Rhodocyclales(100);Rhodocyclaceae(100);unclassified(100);	0	0	3.00568e-06	0	3.00568e-06	0	0
Otu002018	2	Bacteria(100);Proteobacteria(100);Betaproteobacteria(100);Rhodocyclales(100);Rhodocyclaceae(100);Candidatus_Accumulibacter(100);	3.00568e-06	3.00568e-06	0	0	0	0	0
Otu002019	2	Bacteria(100);Proteobacteria(100);Betaproteobacteria(100);Rhodocyclales(100);Rhodocyclaceae(100);unclassified(100);	0	0	3.00568e-06	3.00568e-06	0	0	0
Otu002020	2	Bacteria(100);Proteobacteria(100);Betaproteobacteria(100);Rhodocyclales(100);Rhodocyclaceae(100);unclassified(100);	0	0	3.00568e-06	0	3.00568e-06	0	0
Otu002021	2	Bacteria(100);Proteobacteria(100);Betaproteobacteria(100);Rhodocyclales(100);Rhodocyclaceae(100);Candidatus_Accumulibacter(100);	3.00568e-06	0	0	0	0	0	0
Otu002022	2	Bacteria(100);Proteobacteria(100);Betaproteobacteria(100);Rhodocyclales(100);Rhodocyclaceae(100);unclassified(100);	0	3.00568e-06	3.00568e-06	0	0	0	0
[truncated: 16,723 more rows]

## Sheet: 18S
OTU	Size	Taxonomy	S1	S2	S3	S4	S5	S6	S7
Otu00001	942975	Eukaryota(100);unclassified(100);unclassified(100);unclassified(100);unclassified(100);unclassified(100);	0.162662	0.14796	0.31441	0.256359	0.185782	0.3062	0.0371475
Otu00002	811394	Eukaryota(100);unclassified(100);unclassified(100);unclassified(100);unclassified(100);unclassified(100);	0.316112	0.0708159	0.115058	0.164886	0.145461	0.155161	0.269781
Otu00003	586244	Eukaryota(100);Archaeplastida(100);Chloroplastida(100);Chlorophyta(100);Chlorophyceae(100);Desmodesmus(100);	0.32594	0.238298	0.0962844	0.0711558	0.0659129	0.0501011	0.0222271
Otu00004	366588	Eukaryota(100);Excavata(100);Discoba(100);Discicristata(100);Euglenozoa(100);Kinetoplastea(100);	0.00108395	0.13799	0.130069	0.0887436	0.121371	0.00506422	0.0653614
Otu00005	352127	Eukaryota(100);Archaeplastida(100);Chloroplastida(100);Chlorophyta(100);Trebouxiophyceae(100);Parachlorella(99);	0.0210946	0.101016	0.0576576	0.0837591	0.0807084	0.0886482	0.109224
Otu00006	294649	Eukaryota(100);unclassified(100);unclassified(100);unclassified(100);unclassified(100);unclassified(100);	0.0148233	0.0412578	0.0322497	0.0602677	0.0925643	0.0621841	0.156198
Otu00007	186087	Eukaryota(100);Opisthokonta(100);Holozoa(100);unclassified(100);unclassified(100);unclassified(100);	0.0015713	0.016535	0.0785718	0.0649677	0.0816484	0.0301217	0.000933066
Otu00008	131940	Eukaryota(100);Archaeplastida(100);Chloroplastida(100);Chlorophyta(100);Chlorophyceae(100);Characiopodium(100);	0.000164761	0.00728415	0.0180682	0.0708922	0.0535819	0.0291904	0.0208327
Otu00009	112929	Eukaryota(100);unclassified(100);unclassified(100);unclassified(100);unclassified(100);unclassified(100);	0.000300038	0.0949004	0.00300211	0.00141694	0.00454739	0.0687746	0.00384326
Otu00010	91437	Eukaryota(100);SAR(100);Stramenopiles(100);Ochrophyta(100);Diatomea(100);Bacillariophytina(100);	0.00523765	0.0161223	0.0228931	0.0161708	0.0291644	0.0235798	0.0265039
Otu00011	60401	Eukaryota(100);SAR(100);Rhizaria(100);Cercozoa(100);Incertae_Sedis(100);Gymnophrys(100);	5.54983e-05	8.32475e-05	0.001051	0.0302969	0.0368856	0.0218369	0.00114639
Otu00012	56001	Eukaryota(100);Excavata(100);Discoba(100);Discicristata(100);Euglenozoa(100);Kinetoplastea(100);	0.00114118	0.000251477	0.0131895	0.0021124	0.000308709	0.000664246	0.0733584
Otu00013	44130	Eukaryota(100);SAR(100);Rhizaria(100);Cercozoa(100);Thecofilosea(100);Cryomonadida(100);	0.00890228	0.0010458	0.00387274	0.0114829	0.0092318	0.0190099	0.0148042
Otu00014	42281	Eukaryota(100);unclassified(100);unclassified(100);unclassified(100);unclassified(100);unclassified(100);	2.25462e-05	3.81551e-05	0.000104059	0.00197539	0.00473123	0.0228532	0.0393605
Otu00015	40899	Eukaryota(100);SAR(100);Alveolata(100);unclassified(100);unclassified(100);unclassified(100);	0.0595532	0.000652105	0.000223728	0.00012834	1.73432e-06	1.04059e-05	3.46865e-06
Otu00016	39526	Eukaryota(100);unclassified(100);unclassified(100);unclassified(100);unclassified(100);unclassified(100);	8.15132e-05	0.00762061	0.0456439	0.00146377	0.000861958	0.000156089	0.000353802
Otu00017	28517	Eukaryota(100);Opisthokonta(100);Holozoa(100);Metazoa(100);Animalia(100);Rotifera(100);	0.00271768	0.000149152	0.000431846	0.000313912	1.04059e-05	0.000109262	0.0435957
Otu00018	26493	Eukaryota(100);unclassified(100);unclassified(100);unclassified(100);unclassified(100);unclassified(100);	0.000457861	0.000574061	0.00150192	0.00549607	0.011528	0.0115662	0.0103105
Otu00019	24182	Eukaryota(100);Excavata(100);Discoba(100);Discicristata(100);Euglenozoa(100);Kinetoplastea(100);	6.59043e-05	0.00888493	0.00863866	0.00591577	0.0081305	0.000327787	0.00450924
Otu00020	21992	Eukaryota(100);unclassified(100);unclassified(100);unclassified(100);unclassified(100);unclassified(100);	0.00891442	0.000815132	0.00315994	0.00982494	0.00267259	0.0077663	0.000104059
Otu00021	17954	Eukaryota(100);Archaeplastida(100);Chloroplastida(100);Chlorophyta(100);Chlorophyceae(100);unclassified(100);	0.00104233	0.00130941	0.00498965	0.00601983	0.00657308	0.00469481	0.00254252
Otu00022	13911	Bacteria(100);Proteobacteria(100);Betaproteobacteria(100);Burkholderiales(100);Comamonadaceae(100);unclassified(100);	0.00293274	0.00410688	0.00202742	0.00276624	0.00340621	0.00295529	0.00289458
Otu00023	13583	Eukaryota(100);unclassified(100);unclassified(100);unclassified(100);unclassified(100);unclassified(100);	0.000681589	0.00188001	0.00150886	0.00270207	0.00432713	0.00288244	0.00719397
Otu00024	13252	Eukaryota(100);unclassified(100);unclassified(100);unclassified(100);unclassified(100);unclassified(100);	2.42805e-05	0.00515961	0.00457167	0.00307669	0.00447629	0.000175167	0.0023344
Otu00025	11889	Eukaryota(100);unclassified(100);unclassified(100);unclassified(100);unclassified(100);unclassified(100);	3.46865e-06	3.46865e-06	5.8967e-05	0.000740556	0.00242458	0.0092318	0.00669102
Otu00026	11781	Eukaryota(100);Excavata(100);Discoba(100);Discicristata(100);Euglenozoa(100);Kinetoplastea(96);	3.64208e-05	0.00466186	0.00439304	0.00308363	0.0030923	0.000176901	0.00215403
Otu00027	11581	unknown(100);unclassified(100);unclassified(100);unclassified(100);unclassified(100);unclassified(100);	0.00167536	0.00234654	0.00371145	0.00142214	0.00098683	0.00726681	3.12178e-05
Otu00028	11553	Eukaryota(100);unclassified(100);unclassified(100);unclassified(100);unclassified(100);unclassified(100);	0.000234134	0.0144851	3.81551e-05	0.000119668	0.000133543	0.00269167	4.68267e-05
Otu00029	11341	Eukaryota(100);SAR(100);Stramenopiles(100);Ochrophyta(100);Chrysophyceae(100);Ochromonadales(99);	0.0127299	0.00136665	7.80445e-05	3.29521e-05	0.000443987	0.00149325	0.000317381
Otu00030	10796	Eukaryota(100);SAR(100);Stramenopiles(100);Ochrophyta(100);unclassified(100);unclassified(100);	3.46865e-05	0.000561921	0.00330388	0.00155048	0.000501219	0.0103626	0.000442252
Otu00031	10695	Eukaryota(100);unclassified(100);unclassified(100);unclassified(100);unclassified(100);unclassified(100);	4.16237e-05	0.00371318	0.00351374	0.00238469	0.00446068	0.000109262	0.00177941
Otu00032	10318	Eukaryota(100);unclassified(100);unclassified(100);unclassified(100);unclassified(100);unclassified(100);	0.00173953	0.0017482	0.00354496	0.00261189	0.00207945	0.0032692	0.000431846
Otu00033	10203	Eukaryota(100);unclassified(100);unclassified(100);unclassified(100);unclassified(100);unclassified(100);	2.25462e-05	0.00849298	0.000291366	0.000126606	0.000428378	0.00629386	0.000346865
Otu00034	10050	Eukaryota(100);Opisthokonta(100);Holozoa(100);unclassified(100);unclassified(100);unclassified(100);	8.67161e-06	8.67161e-06	1.73432e-05	0.000359005	0.000848084	0.0042647	0.011032
Otu00035	9686	Eukaryota(100);unclassified(100);unclassified(100);unclassified(100);unclassified(100);unclassified(100);	0.000471736	0.00135797	0.00101631	0.00187307	0.00301599	0.00203609	0.00542149
Otu00036	9440	Eukaryota(100);unclassified(100);unclassified(100);unclassified(100);unclassified(100);unclassified(100);	0.000492548	0.00135797	0.00115506	0.0019858	0.00294488	0.00220086	0.00454566
Otu00037	9260	Eukaryota(100);unclassified(100);unclassified(100);unclassified(100);unclassified(100);unclassified(100);	0.000156089	0.00264311	0.00203783	0.00204823	0.00112384	0.00162506	0.0047954
Otu00038	9256	Eukaryota(100);unclassified(100);unclassified(100);unclassified(100);unclassified(100);unclassified(100);	0.000104059	0.000182104	0.000499485	0.00200141	0.00392651	0.00394732	0.00372186
Otu00039	6511	Eukaryota(100);unclassified(100);unclassified(100);unclassified(100);unclassified(100);unclassified(100);	0.000159558	0.00843921	2.42805e-05	2.08119e-05	4.68267e-05	0.00130421	3.46865e-06
Otu00040	5698	Eukaryota(100);SAR(100);Alveolata(100);Ciliophora(100);Intramacronucleata(100);Conthreep(100);	0.0080039	0.00026882	4.16237e-05	1.73432e-06	0	1.73432e-06	0
Otu00041	5217	Eukaryota(100);Opisthokonta(100);unclassified(100);unclassified(100);unclassified(100);unclassified(100);	1.73432e-06	1.38746e-05	0	5.20297e-06	6.93729e-06	9.71221e-05	0.0086456
Otu00042	5084	unknown(100);unclassified(100);unclassified(100);unclassified(100);unclassified(100);unclassified(100);	5.3764e-05	5.20297e-05	0.000301772	0.000643434	0.000716275	0.00180543	0.00466706
Otu00043	5008	Eukaryota(100);unclassified(100);unclassified(100);unclassified(100);unclassified(100);unclassified(100);	0.00654013	0.000286163	0.000221993	5.54983e-05	3.64208e-05	3.64208e-05	1.21403e-05
Otu00044	4314	Eukaryota(100);Excavata(100);Discoba(100);Discicristata(100);Euglenozoa(100);Kinetoplastea(100);	0.000109262	0.00639445	2.42805e-05	8.67161e-06	1.73432e-06	0	1.73432e-06
Otu00045	4091	Eukaryota(100);unclassified(100);unclassified(100);unclassified(100);unclassified(100);unclassified(100);	0.000197713	0.000560186	0.000407566	0.000783914	0.00128687	0.000842881	0.00225635
Otu00046	4024	Eukaryota(100);unclassified(100);unclassified(100);unclassified(100);unclassified(100);unclassified(100);	8.49818e-05	0.00518042	6.93729e-06	3.12178e-05	3.46865e-05	0.000820335	1.21403e-05
Otu00047	3750	Eukaryota(100);unclassified(100);unclassified(100);unclassified(100);unclassified(100);unclassified(100);	0.000232399	0.000482142	0.000438784	0.000799523	0.00106834	0.00079432	0.00209506
Otu00048	3502	Eukaryota(100);unclassified(100);unclassified(100);unclassified(100);unclassified(100);unclassified(100);	0.00404444	0.000143949	0.000124871	0.00015262	8.67161e-05	0.000312178	0.000369411
Otu00049	2986	Eukaryota(100);unclassified(100);unclassified(100);unclassified(100);unclassified(100);unclassified(100);	0.00324318	0.00018037	0.000237602	0.000194244	0.000107528	0.000282695	4.33581e-05
Otu00050	2981	Eukaryota(100);unclassified(100);unclassified(100);unclassified(100);unclassified(100);unclassified(100);	0.000554983	0.000501219	0.00101111	0.000771774	0.000575795	0.00099897	0.000107528
Otu00051	2225	Eukaryota(100);unclassified(100);unclassified(100);unclassified(100);unclassified(100);unclassified(100);	0.000353802	0.000372879	0.00066598	0.00062609	0.000443987	0.000695463	0.000102325
Otu00052	1902	Eukaryota(100);unclassified(100);unclassified(100);unclassified(100);unclassified(100);unclassified(100);	6.41699e-05	3.98894e-05	1.38746e-05	8.49818e-05	0.000157823	0.000745759	0.00200661
Otu00053	1823	Eukaryota(100);unclassified(100);unclassified(100);unclassified(100);unclassified(100);unclassified(100);	0.00229971	0	3.29521e-05	0.000291366	0	0	0
Otu00054	1725	Eukaryota(100);Opisthokonta(100);Holozoa(100);unclassified(100);unclassified(100);unclassified(100);	0.00209853	0.000359005	4.16237e-05	1.04059e-05	1.73432e-06	1.04059e-05	0
Otu00055	1599	Eukaryota(100);SAR(100);Stramenopiles(100);Ochrophyta(100);unclassified(100);unclassified(100);	3.46865e-06	8.84505e-05	0.000511625	0.000234134	7.97788e-05	0.00153141	5.72326e-05
Otu00056	1576	Eukaryota(100);unclassified(100);unclassified(100);unclassified(100);unclassified(100);unclassified(100);	2.08119e-05	3.64208e-05	7.97788e-05	0.000315647	0.000721478	0.000624356	0.00062609
Otu00057	1542	Eukaryota(100);unclassified(100);unclassified(100);unclassified(100);unclassified(100);unclassified(100);	0.00171871	0.000360739	0.000124871	4.68267e-05	8.67161e-06	1.04059e-05	1.73432e-05
Otu00058	1488	Eukaryota(100);Opisthokonta(100);unclassified(100);unclassified(100);unclassified(100);unclassified(100);	0.00214362	2.94835e-05	3.46865e-06	1.73432e-06	0	0	1.04059e-05
Otu00059	1483	Eukaryota(100);unclassified(100);unclassified(100);unclassified(100);unclassified(100);unclassified(100);	0.000239337	0.00201008	1.73432e-06	0	0	0	0
Otu00060	1365	Eukaryota(100);unclassified(100);unclassified(100);unclassified(100);unclassified(100);unclassified(100);	7.63102e-05	0.00019251	9.88564e-05	0.000289632	0.000398894	0.000298303	0.000792585
Otu00061	1330	Eukaryota(100);unclassified(100);unclassified(100);unclassified(100);unclassified(100);unclassified(100);	5.20297e-06	0.00114465	4.16237e-05	2.42805e-05	5.54983e-05	0.000783914	3.81551e-05
Otu00062	1257	Eukaryota(100);Opisthokonta(100);Nucletmycea(100);Fungi(100);Dikarya(100);Ascomycota(100);	5.8967e-05	6.93729e-06	2.60148e-05	0.000315647	0.000414503	0.000752696	0.000379817
Otu00063	1238	Eukaryota(100);Opisthokonta(100);Nucletmycea(100);Fungi(100);Dikarya(100);Ascomycota(100);	2.77492e-05	9.19191e-05	5.3764e-05	0.000220259	0.000339927	0.000147417	0.00108742
Otu00064	1180	Eukaryota(100);unclassified(100);unclassified(100);unclassified(100);unclassified(100);unclassified(100);	2.77492e-05	0.00150192	1.73432e-06	2.25462e-05	1.21403e-05	0.000286163	3.46865e-06
Otu00065	1074	Eukaryota(100);unclassified(100);unclassified(100);unclassified(100);unclassified(100);unclassified(100);	0	0.000863693	3.12178e-05	6.93729e-06	4.16237e-05	0.000681589	3.98894e-05
Otu00066	1055	Bacteria(100);Proteobacteria(100);Betaproteobacteria(100);unclassified(100);unclassified(100);unclassified(100);	1.38746e-05	3.12178e-05	5.72326e-05	0.00021679	0.000312178	0.000315647	0.000719744
Otu00067	1027	Eukaryota(100);unclassified(100);unclassified(100);unclassified(100);unclassified(100);unclassified(100);	3.46865e-06	0	1.04059e-05	1.56089e-05	8.67161e-06	0.000169964	0.00151233
Otu00068	958	Eukaryota(100);unclassified(100);unclassified(100);unclassified(100);unclassified(100);unclassified(100);	0.000117934	0.000289632	0.00019251	2.60148e-05	2.77492e-05	0.000388488	0.000435315
Otu00069	958	Eukaryota(100);Opisthokonta(100);Holozoa(100);unclassified(100);unclassified(100);unclassified(100);	6.93729e-06	7.28415e-05	0.000411034	0.000327787	0.000433581	0.000163026	5.20297e-06
Otu00070	951	unknown(100);unclassified(100);unclassified(100);unclassified(100);unclassified(100);unclassified(100);	0	0	0	3.46865e-06	3.46865e-06	2.08119e-05	0.00158864
Otu00071	851	Eukaryota(100);unclassified(100);unclassified(100);unclassified(100);unclassified(100);unclassified(100);	0.000135277	0.000154355	0.000359005	0.000218525	0.000164761	0.000187307	3.98894e-05
Otu00072	828	Eukaryota(100);unclassified(100);unclassified(100);unclassified(100);unclassified(100);unclassified(100);	2.08119e-05	0.000948674	0	1.04059e-05	1.90775e-05	0.000265351	0
Otu00073	772	Eukaryota(100);unclassified(100);unclassified(100);unclassified(100);unclassified(100);unclassified(100);	3.12178e-05	2.42805e-05	3.81551e-05	0.000119668	0.000329521	0.00038502	0.000282695
Otu00074	767	Eukaryota(100);unclassified(100);unclassified(100);unclassified(100);unclassified(100);unclassified(100);	3.29521e-05	9.36534e-05	7.45759e-05	0.000176901	0.000272289	0.000137011	0.000424909
Otu00075	757	Eukaryota(100);unclassified(100);unclassified(100);unclassified(100);unclassified(100);unclassified(100);	1.73432e-06	0.000348599	0.00026882	0.000145683	0.000242805	5.20297e-06	0.000131809
Otu00076	756	Eukaryota(100);Archaeplastida(100);Chloroplastida(100);Chlorophyta(100);Trebouxiophyceae(100);unclassified(100);	2.08119e-05	0.000173432	0.000237602	0.000190775	0.000232399	0.000147417	0.00014048
Otu00077	745	Eukaryota(100);unclassified(100);unclassified(100);unclassified(100);unclassified(100);unclassified(100);	8.84505e-05	0.00105967	0	0	0	0	0
Otu00078	733	Eukaryota(100);unclassified(100);unclassified(100);unclassified(100);unclassified(100);unclassified(100);	5.20297e-06	6.76386e-05	0.000258414	0.000267086	0.00033299	0.000142214	3.46865e-06
Otu00079	714	Eukaryota(100);SAR(100);Stramenopiles(100);unclassified(100);unclassified(100);unclassified(100);	0	0.000123137	0.000868896	2.77492e-05	6.93729e-06	5.20297e-06	6.93729e-06
Otu00080	698	Eukaryota(100);unclassified(100);unclassified(100);unclassified(100);unclassified(100);unclassified(100);	2.94835e-05	0.000105794	7.11072e-05	0.000130074	0.000221993	0.000147417	0.000407566
Otu00081	655	Eukaryota(100);unclassified(100);unclassified(100);unclassified(100);unclassified(100);unclassified(100);	0.000104059	0.000133543	0.000197713	0.000154355	0.000114465	0.000235868	2.42805e-05
Otu00082	653	Eukaryota(100);unclassified(100);unclassified(100);unclassified(100);unclassified(100);unclassified(100);	7.97788e-05	6.41699e-05	0.000121403	0.000112731	0.000121403	0.000395426	0.000117934
Otu00083	587	Eukaryota(100);unclassified(100);unclassified(100);unclassified(100);unclassified(100);unclassified(100);	0.000402363	7.28415e-05	9.88564e-05	9.19191e-05	5.02954e-05	0.000145683	2.25462e-05
Otu00084	581	Eukaryota(100);unclassified(100);unclassified(100);unclassified(100);unclassified(100);unclassified(100);	2.77492e-05	9.19191e-05	7.11072e-05	0.000112731	0.000183838	0.000142214	0.00026882
Otu00085	578	Eukaryota(100);Excavata(100);Discoba(100);Discicristata(100);Heterolobosea(100);Tetramitia(100);	0.000759633	1.38746e-05	0	1.56089e-05	1.38746e-05	2.42805e-05	0
Otu00086	552	Eukaryota(100);unclassified(100);unclassified(100);unclassified(100);unclassified(100);unclassified(100);	1.56089e-05	8.67161e-06	2.77492e-05	0.000126606	0.000248008	0.000202916	0.000232399
Otu00087	547	Eukaryota(100);unclassified(100);unclassified(100);unclassified(100);unclassified(100);unclassified(100);	2.25462e-05	6.93729e-05	4.68267e-05	0.000104059	0.000164761	0.000119668	0.000324318
Otu00088	523	Eukaryota(100);unclassified(100);unclassified(100);unclassified(100);unclassified(100);unclassified(100);	6.93729e-06	0.000787382	0	1.73432e-06	0	0	0
Otu00089	522	Eukaryota(100);Opisthokonta(100);Holozoa(100);Metazoa(100);Animalia(100);Rotifera(100);	0.000350333	0	0	4.8561e-05	6.93729e-06	0.000150886	0.000272289
Otu00090	504	Eukaryota(100);unclassified(100);unclassified(100);unclassified(100);unclassified(100);unclassified(100);	0.000712807	5.20297e-06	0	6.93729e-06	0	1.73432e-06	0
Otu00091	488	Eukaryota(100);Archaeplastida(100);Chloroplastida(100);Chlorophyta(100);unclassified(100);unclassified(100);	5.8967e-05	0.000211587	1.73432e-05	2.08119e-05	5.72326e-05	0.000365942	4.16237e-05
Otu00092	484	Eukaryota(100);unclassified(100);unclassified(100);unclassified(100);unclassified(100);unclassified(100);	0.000615685	3.12178e-05	1.56089e-05	8.67161e-06	0	3.46865e-06	0
Otu00093	480	Eukaryota(100);unclassified(100);unclassified(100);unclassified(100);unclassified(100);unclassified(100);	1.73432e-06	0.000107528	0.000556718	1.38746e-05	6.93729e-06	0	3.46865e-06
Otu00094	474	Eukaryota(100);unclassified(100);unclassified(100);unclassified(100);unclassified(100);unclassified(100);	0	0.000438784	2.08119e-05	3.46865e-06	2.42805e-05	0.00025668	1.38746e-05
Otu00095	450	Eukaryota(100);unclassified(100);unclassified(100);unclassified(100);unclassified(100);unclassified(100);	1.56089e-05	0.000551515	0	3.46865e-06	6.93729e-06	0.000110997	0
Otu00096	448	Eukaryota(100);unclassified(100);unclassified(100);unclassified(100);unclassified(100);unclassified(100);	2.60148e-05	0.000395426	0	5.54983e-05	0.000161292	8.67161e-06	1.21403e-05
Otu00097	430	Eukaryota(100);unclassified(100);unclassified(100);unclassified(100);unclassified(100);unclassified(100);	1.73432e-05	5.8967e-05	3.98894e-05	7.97788e-05	0.000114465	0.000112731	0.000263617
Otu00098	415	Eukaryota(100);unclassified(100);unclassified(100);unclassified(100);unclassified(100);unclassified(100);	0.000535906	3.29521e-05	2.77492e-05	1.73432e-06	0	3.46865e-06	0
Otu00099	415	Eukaryota(100);unclassified(100);unclassified(100);unclassified(100);unclassified(100);unclassified(100);	8.67161e-06	6.59043e-05	5.54983e-05	8.49818e-05	0.000133543	9.71221e-05	0.000206384
Otu00100	414	Eukaryota(100);unclassified(100);unclassified(100);unclassified(100);unclassified(100);unclassified(100);	5.20297e-06	8.32475e-05	2.60148e-05	0.000287898	0.000119668	9.19191e-05	0
Otu00101	413	Eukaryota(100);SAR(100);Stramenopiles(100);unclassified(100);unclassified(100);unclassified(100);	1.73432e-06	6.41699e-05	0.000476939	8.67161e-06	1.38746e-05	0	1.73432e-06
Otu00102	399	Eukaryota(100);unclassified(100);unclassified(100);unclassified(100);unclassified(100);unclassified(100);	0	0.000327787	8.67161e-06	0	1.73432e-05	0.000242805	1.21403e-05
Otu00103	399	Eukaryota(100);unclassified(100);unclassified(100);unclassified(100);unclassified(100);unclassified(100);	3.46865e-06	0.000390223	8.67161e-06	5.20297e-06	1.38746e-05	0.000208119	5.20297e-06
Otu00104	391	Bacteria(100);Proteobacteria(100);Deltaproteobacteria(100);Bdellovibrionales(100);Bdellovibrionaceae(100);Bdellovibrio(100);	3.46865e-05	8.67161e-06	0	1.04059e-05	0	2.08119e-05	0.000567123
Otu00105	385	Bacteria(100);Proteobacteria(100);Alphaproteobacteria(100);Rhizobiales(100);unclassified(100);unclassified(100);	2.25462e-05	1.90775e-05	2.60148e-05	0.000176901	0.000215056	0.000119668	1.56089e-05
Otu00106	382	Eukaryota(100);unclassified(100);unclassified(100);unclassified(100);unclassified(100);unclassified(100);	3.12178e-05	5.20297e-05	2.08119e-05	6.41699e-05	0.000156089	6.76386e-05	0.000228931
Otu00107	380	Bacteria(100);Proteobacteria(100);Deltaproteobacteria(100);unclassified(100);unclassified(100);unclassified(100);	3.46865e-06	6.93729e-06	1.38746e-05	0.000378082	9.36534e-05	7.28415e-05	1.04059e-05
Otu00108	378	Eukaryota(100);unclassified(100);unclassified(100);unclassified(100);unclassified(100);unclassified(100);	1.73432e-06	0.000303506	6.93729e-06	3.46865e-06	2.08119e-05	0.000237602	8.67161e-06
Otu00109	370	Bacteria(100);Proteobacteria(100);Alphaproteobacteria(100);unclassified(100);unclassified(100);unclassified(100);	5.20297e-05	1.73432e-05	6.93729e-06	3.46865e-05	2.94835e-05	1.38746e-05	0.000445721
Otu00110	365	Bacteria(100);Proteobacteria(100);Alphaproteobacteria(100);Rhizobiales(100);unclassified(100);unclassified(100);	6.93729e-06	5.8967e-05	7.28415e-05	0.000161292	0.000110997	7.45759e-05	5.20297e-05
Otu00111	357	Eukaryota(100);unclassified(100);unclassified(100);unclassified(100);unclassified(100);unclassified(100);	0.000190775	1.73432e-05	5.54983e-05	0.000104059	3.98894e-05	0.000104059	3.46865e-05
Otu00112	354	Eukaryota(100);unclassified(100);unclassified(100);unclassified(100);unclassified(100);unclassified(100);	2.08119e-05	0.000339927	0	4.8561e-05	0.000110997	1.73432e-06	5.20297e-06
Otu00113	351	Eukaryota(100);unclassified(100);unclassified(100);unclassified(100);unclassified(100);unclassified(100);	0	0.000291366	1.21403e-05	6.93729e-06	1.56089e-05	0.000213322	1.73432e-05
Otu00114	340	Eukaryota(100);unclassified(100);unclassified(100);unclassified(100);unclassified(100);unclassified(100);	0	1.38746e-05	9.19191e-05	0.000131809	0.000114465	0.000161292	6.93729e-06
Otu00115	321	Eukaryota(100);unclassified(100);unclassified(100);unclassified(100);unclassified(100);unclassified(100);	0	0.000138746	0.000107528	6.93729e-05	9.36534e-05	5.20297e-06	4.8561e-05
Otu00116	320	Eukaryota(100);unclassified(100);unclassified(100);unclassified(100);unclassified(100);unclassified(100);	0	0.000117934	0.000109262	9.19191e-05	0.000112731	1.73432e-06	6.24356e-05
Otu00117	310	Eukaryota(100);unclassified(100);unclassified(100);unclassified(100);unclassified(100);unclassified(100);	0	0.000289632	8.67161e-06	0	1.38746e-05	0.000178635	8.67161e-06
Otu00118	305	Bacteria(100);Verrucomicrobia(100);Verrucomicrobiae(100);Verrucomicrobiales(100);Verrucomicrobiaceae(100);Brevifollis(100);	8.67161e-05	5.20297e-06	7.63102e-05	0.000104059	6.07013e-05	7.80445e-05	5.02954e-05
Otu00119	301	Eukaryota(100);Excavata(100);Discoba(100);Discicristata(100);Euglenozoa(100);Kinetoplastea(100);	1.73432e-06	0.000110997	0.000112731	7.80445e-05	9.53877e-05	3.46865e-06	5.20297e-05
Otu00120	286	Eukaryota(100);unclassified(100);unclassified(100);unclassified(100);unclassified(100);unclassified(100);	0	1.04059e-05	1.56089e-05	6.76386e-05	0.00012834	0.0001162	0.000104059
Otu00121	279	Eukaryota(100);unclassified(100);unclassified(100);unclassified(100);unclassified(100);unclassified(100);	8.67161e-06	0.000336459	1.73432e-06	3.46865e-06	3.46865e-06	7.45759e-05	0
Otu00122	277	Eukaryota(100);Opisthokonta(100);Nucletmycea(100);Fungi(100);Dikarya(100);Basidiomycota(100);	0.000189041	4.8561e-05	1.04059e-05	2.77492e-05	6.93729e-05	4.33581e-05	4.33581e-05
Otu00123	257	Eukaryota(100);Excavata(100);Discoba(100);Discicristata(100);Euglenozoa(100);Kinetoplastea(100);	0	9.88564e-05	6.93729e-05	6.07013e-05	0.000110997	6.93729e-06	3.29521e-05
Otu00124	256	Eukaryota(100);Opisthokonta(100);Holozoa(100);unclassified(100);unclassified(100);unclassified(100);	3.46865e-06	2.42805e-05	0.000114465	9.36534e-05	0.000105794	3.81551e-05	0
Otu00125	254	Eukaryota(100);unclassified(100);unclassified(100);unclassified(100);unclassified(100);unclassified(100);	4.16237e-05	3.81551e-05	8.49818e-05	6.24356e-05	5.3764e-05	9.88564e-05	0
Otu00126	246	Eukaryota(100);unclassified(100);unclassified(100);unclassified(100);unclassified(100);unclassified(100);	0.000109262	6.07013e-05	6.59043e-05	4.50924e-05	2.08119e-05	3.46865e-05	2.77492e-05
Otu00127	243	Eukaryota(100);Opisthokonta(100);Nucletmycea(100);Fungi(100);Dikarya(100);Basidiomycota(100);	0.000241071	1.73432e-05	3.46865e-06	2.08119e-05	3.46865e-05	1.90775e-05	3.64208e-05
Otu00128	236	Eukaryota(100);unclassified(100);unclassified(100);unclassified(100);unclassified(100);unclassified(100);	0	3.46865e-06	1.73432e-06	3.98894e-05	6.24356e-05	5.20297e-05	0.000211587
Otu00129	224	Eukaryota(100);Archaeplastida(100);Chloroplastida(100);Chlorophyta(100);unclassified(100);unclassified(100);	2.77492e-05	5.20297e-06	8.67161e-06	4.16237e-05	3.46865e-05	4.8561e-05	0.00018037
Otu00130	223	Eukaryota(100);Archaeplastida(100);Chloroplastida(100);Chlorophyta(100);Chlorophyceae(100);unclassified(100);	6.93729e-06	2.08119e-05	6.59043e-05	4.68267e-05	7.80445e-05	7.11072e-05	4.68267e-05
Otu00131	219	unknown(100);unclassified(100);unclassified(100);unclassified(100);unclassified(100);unclassified(100);	1.56089e-05	5.72326e-05	6.24356e-05	2.25462e-05	2.08119e-05	0.000137011	5.20297e-06
Otu00132	217	Eukaryota(100);unclassified(100);unclassified(100);unclassified(100);unclassified(100);unclassified(100);	0	0	1.73432e-06	1.21403e-05	6.93729e-06	7.80445e-05	0.000254945
Otu00133	215	Eukaryota(100);unclassified(100);unclassified(100);unclassified(100);unclassified(100);unclassified(100);	8.49818e-05	8.67161e-06	3.46865e-05	9.19191e-05	2.42805e-05	6.93729e-05	1.73432e-06
Otu00134	214	Eukaryota(100);unclassified(100);unclassified(100);unclassified(100);unclassified(100);unclassified(100);	6.59043e-05	5.3764e-05	4.68267e-05	7.63102e-05	2.42805e-05	2.60148e-05	5.20297e-06
Otu00135	212	Eukaryota(100);unclassified(100);unclassified(100);unclassified(100);unclassified(100);unclassified(100);	2.77492e-05	4.33581e-05	6.24356e-05	3.12178e-05	1.56089e-05	0.00014048	1.73432e-06
Otu00136	211	Eukaryota(100);unclassified(100);unclassified(100);unclassified(100);unclassified(100);unclassified(100);	0	0.000168229	6.93729e-06	0	1.04059e-05	0.000142214	5.20297e-06
Otu00137	210	Eukaryota(100);unclassified(100);unclassified(100);unclassified(100);unclassified(100);unclassified(100);	3.46865e-06	0.00026882	0	5.20297e-06	1.73432e-06	4.68267e-05	0
Otu00138	210	Eukaryota(100);unclassified(100);unclassified(100);unclassified(100);unclassified(100);unclassified(100);	0	0	0	5.20297e-06	1.73432e-06	2.77492e-05	0.000326053
Otu00139	206	Eukaryota(100);unclassified(100);unclassified(100);unclassified(100);unclassified(100);unclassified(100);	1.90775e-05	3.46865e-05	2.08119e-05	3.46865e-05	5.72326e-05	4.16237e-05	0.000114465
Otu00140	204	Eukaryota(100);unclassified(100);unclassified(100);unclassified(100);unclassified(100);unclassified(100);	0	0.000169964	5.20297e-06	0	6.93729e-06	0.000126606	3.46865e-06
Otu00141	196	Eukaryota(100);unclassified(100);unclassified(100);unclassified(100);unclassified(100);unclassified(100);	1.73432e-06	1.21403e-05	8.67161e-05	7.28415e-05	7.45759e-05	2.94835e-05	0
Otu00142	194	unknown(100);unclassified(100);unclassified(100);unclassified(100);unclassified(100);unclassified(100);	3.46865e-05	4.33581e-05	6.24356e-05	2.77492e-05	1.73432e-05	0.000104059	0
Otu00143	194	Eukaryota(100);Opisthokonta(100);Holozoa(100);unclassified(100);unclassified(100);unclassified(100);	0	1.73432e-05	8.15132e-05	6.41699e-05	9.53877e-05	2.60148e-05	0
Otu00144	192	Eukaryota(100);unclassified(100);unclassified(100);unclassified(100);unclassified(100);unclassified(100);	0.000263617	1.73432e-06	8.67161e-06	1.73432e-06	0	0	3.46865e-06
Otu00145	191	Bacteria(100);Verrucomicrobia(100);Verrucomicrobiae(100);Verrucomicrobiales(100);unclassified(100);unclassified(100);	1.04059e-05	1.21403e-05	3.81551e-05	7.11072e-05	7.97788e-05	5.54983e-05	2.77492e-05
Otu00146	185	Eukaryota(100);unclassified(100);unclassified(100);unclassified(100);unclassified(100);unclassified(100);	0	6.93729e-05	6.07013e-05	5.3764e-05	5.8967e-05	1.73432e-06	3.81551e-05
Otu00147	182	unknown(100);unclassified(100);unclassified(100);unclassified(100);unclassified(100);unclassified(100);	6.24356e-05	1.04059e-05	2.60148e-05	4.33581e-05	2.77492e-05	5.02954e-05	6.24356e-05
Otu00148	178	Eukaryota(100);Excavata(100);Discoba(100);Discicristata(100);Euglenozoa(100);Kinetoplastea(100);	0	5.20297e-05	5.54983e-05	6.59043e-05	4.68267e-05	1.21403e-05	2.77492e-05
Otu00149	178	unknown(100);unclassified(100);unclassified(100);unclassified(100);unclassified(100);unclassified(100);	1.73432e-06	2.60148e-05	6.24356e-05	6.76386e-05	3.29521e-05	6.24356e-05	8.67161e-06
Otu00150	171	Eukaryota(100);unclassified(100);unclassified(100);unclassified(100);unclassified(100);unclassified(100);	0	2.77492e-05	4.8561e-05	6.07013e-05	5.8967e-05	1.73432e-06	5.20297e-05
Otu00151	170	Eukaryota(100);unclassified(100);unclassified(100);unclassified(100);unclassified(100);unclassified(100);	0	1.73432e-06	6.93729e-06	3.64208e-05	5.72326e-05	6.93729e-05	8.67161e-05
Otu00152	165	Eukaryota(100);unclassified(100);unclassified(100);unclassified(100);unclassified(100);unclassified(100);	0	0.000123137	3.46865e-06	1.73432e-06	8.67161e-06	0.000102325	1.04059e-05
Otu00153	161	unknown(100);unclassified(100);unclassified(100);unclassified(100);unclassified(100);unclassified(100);	0	1.73432e-06	6.93729e-06	1.38746e-05	2.25462e-05	5.3764e-05	0.000168229
Otu00154	156	Eukaryota(100);Opisthokonta(100);Nucletmycea(100);unclassified(100);unclassified(100);unclassified(100);	0.000173432	3.29521e-05	0	1.73432e-06	3.46865e-06	1.73432e-05	1.21403e-05
Otu00155	156	Eukaryota(100);unclassified(100);unclassified(100);unclassified(100);unclassified(100);unclassified(100);	5.20297e-06	1.73432e-06	5.20297e-06	4.50924e-05	5.8967e-05	7.11072e-05	6.24356e-05
Otu00156	156	Eukaryota(100);Archaeplastida(100);Chloroplastida(100);Chlorophyta(100);Chlorophyceae(100);Characiopodium(100);	0	1.04059e-05	2.25462e-05	7.63102e-05	5.3764e-05	2.94835e-05	3.46865e-05
Otu00157	155	Bacteria(100);Proteobacteria(100);Alphaproteobacteria(100);unclassified(100);unclassified(100);unclassified(100);	6.93729e-06	1.21403e-05	1.73432e-05	2.94835e-05	6.07013e-05	4.50924e-05	7.80445e-05
Otu00158	155	Eukaryota(100);unclassified(100);unclassified(100);unclassified(100);unclassified(100);unclassified(100);	0.00018037	1.04059e-05	1.73432e-06	6.93729e-06	3.46865e-06	1.21403e-05	0
Otu00159	154	Bacteria(100);Proteobacteria(100);Alphaproteobacteria(100);Sphingomonadales(100);unclassified(100);unclassified(100);	3.46865e-06	1.04059e-05	1.90775e-05	2.60148e-05	6.41699e-05	6.24356e-05	5.20297e-05
Otu00160	152	Eukaryota(100);unclassified(100);unclassified(100);unclassified(100);unclassified(100);unclassified(100);	3.46865e-06	4.33581e-05	8.67161e-06	1.90775e-05	5.54983e-05	6.24356e-05	3.46865e-05
Otu00161	151	Eukaryota(100);unclassified(100);unclassified(100);unclassified(100);unclassified(100);unclassified(100);	0	2.94835e-05	1.56089e-05	8.67161e-05	5.20297e-05	4.33581e-05	0
Otu00162	151	Eukaryota(100);SAR(100);Stramenopiles(100);unclassified(100);unclassified(100);unclassified(100);	0	2.77492e-05	0.000189041	1.73432e-06	5.20297e-06	0	1.73432e-06
Otu00163	148	Eukaryota(100);unclassified(100);unclassified(100);unclassified(100);unclassified(100);unclassified(100);	0	0.000142214	0	1.73432e-06	3.46865e-06	7.11072e-05	8.67161e-06
Otu00164	148	Eukaryota(100);unclassified(100);unclassified(100);unclassified(100);unclassified(100);unclassified(100);	1.73432e-06	0.000221993	0	0	0	0	0
Otu00165	147	Eukaryota(100);Opisthokonta(100);Holozoa(100);unclassified(100);unclassified(100);unclassified(100);	0	1.73432e-05	4.50924e-05	7.63102e-05	4.68267e-05	2.77492e-05	0
Otu00166	142	Eukaryota(100);unclassified(100);unclassified(100);unclassified(100);unclassified(100);unclassified(100);	1.04059e-05	0.000213322	0	0	0	0	0
Otu00167	141	Eukaryota(100);unclassified(100);unclassified(100);unclassified(100);unclassified(100);unclassified(100);	3.98894e-05	1.90775e-05	3.29521e-05	4.8561e-05	3.29521e-05	2.42805e-05	1.73432e-06
Otu00168	140	Eukaryota(100);unclassified(100);unclassified(100);unclassified(100);unclassified(100);unclassified(100);	3.46865e-06	0.000187307	0	1.73432e-06	0	2.77492e-05	0
Otu00169	137	Eukaryota(100);Amoebozoa(100);Discosea(100);Longamoebia(100);Centramoebida(100);Acanthamoeba(100);	3.81551e-05	2.77492e-05	3.12178e-05	1.73432e-06	7.45759e-05	1.73432e-05	1.38746e-05
Otu00170	136	Eukaryota(100);Opisthokonta(100);Holozoa(100);unclassified(100);unclassified(100);unclassified(100);	0	1.04059e-05	4.68267e-05	5.72326e-05	6.93729e-05	1.73432e-05	1.73432e-06
Otu00171	135	Eukaryota(100);unclassified(100);unclassified(100);unclassified(100);unclassified(100);unclassified(100);	1.73432e-06	0.000102325	0	1.73432e-06	1.73432e-06	0.000100591	3.46865e-06
Otu00172	135	Eukaryota(100);unclassified(100);unclassified(100);unclassified(100);unclassified(100);unclassified(100);	0	0.000123137	0	0	3.46865e-06	8.32475e-05	3.46865e-06
Otu00173	133	Eukaryota(100);unclassified(100);unclassified(100);unclassified(100);unclassified(100);unclassified(100);	0	0.000105794	1.73432e-06	3.46865e-06	6.93729e-06	7.97788e-05	6.93729e-06
Otu00174	132	Eukaryota(100);unclassified(100);unclassified(100);unclassified(100);unclassified(100);unclassified(100);	0.000194244	0	1.73432e-06	0	0	0	0
Otu00175	129	Eukaryota(100);unclassified(100);unclassified(100);unclassified(100);unclassified(100);unclassified(100);	3.12178e-05	1.21403e-05	4.16237e-05	3.46865e-05	2.94835e-05	3.81551e-05	1.73432e-06
Otu00176	128	Eukaryota(100);unclassified(100);unclassified(100);unclassified(100);unclassified(100);unclassified(100);	6.93729e-06	1.56089e-05	1.38746e-05	1.90775e-05	4.8561e-05	2.77492e-05	5.72326e-05
Otu00177	128	Eukaryota(100);unclassified(100);unclassified(100);unclassified(100);unclassified(100);unclassified(100);	0	0	0	5.20297e-06	1.04059e-05	6.93729e-05	0.000123137
Otu00178	127	Eukaryota(100);unclassified(100);unclassified(100);unclassified(100);unclassified(100);unclassified(100);	0.000163026	1.04059e-05	0	0	0	0	0
Otu00179	127	Eukaryota(100);unclassified(100);unclassified(100);unclassified(100);unclassified(100);unclassified(100);	1.90775e-05	3.46865e-05	1.38746e-05	8.67161e-06	1.73432e-06	3.98894e-05	6.41699e-05
Otu00180	126	Eukaryota(100);unclassified(100);unclassified(100);unclassified(100);unclassified(100);unclassified(100);	0	5.72326e-05	3.46865e-05	4.33581e-05	4.33581e-05	3.46865e-06	1.38746e-05
Otu00181	126	Eukaryota(100);unclassified(100);unclassified(100);unclassified(100);unclassified(100);unclassified(100);	0	0	0	5.20297e-06	2.42805e-05	6.24356e-05	0.000112731
Otu00182	123	unknown(100);unclassified(100);unclassified(100);unclassified(100);unclassified(100);unclassified(100);	1.90775e-05	1.04059e-05	1.38746e-05	2.25462e-05	2.08119e-05	1.21403e-05	9.36534e-05
Otu00183	123	Eukaryota(100);unclassified(100);unclassified(100);unclassified(100);unclassified(100);unclassified(100);	8.67161e-05	1.38746e-05	8.67161e-06	2.60148e-05	1.21403e-05	1.21403e-05	2.08119e-05
Otu00184	122	Eukaryota(100);unclassified(100);unclassified(100);unclassified(100);unclassified(100);unclassified(100);	0.000161292	0	1.73432e-06	0	0	0	0
Otu00185	122	Eukaryota(100);unclassified(100);unclassified(100);unclassified(100);unclassified(100);unclassified(100);	5.20297e-06	4.68267e-05	3.46865e-06	6.93729e-06	5.8967e-05	4.33581e-05	2.42805e-05
Otu00186	122	Eukaryota(100);Excavata(100);Discoba(100);Discicristata(100);Euglenozoa(100);Kinetoplastea(100);	5.20297e-06	0	2.77492e-05	1.73432e-06	3.46865e-06	1.73432e-06	0.000149152
Otu00187	122	Eukaryota(100);unclassified(100);unclassified(100);unclassified(100);unclassified(100);unclassified(100);	0	9.53877e-05	6.93729e-06	3.46865e-06	6.93729e-06	7.63102e-05	6.93729e-06
Otu00188	121	Eukaryota(100);SAR(100);Stramenopiles(100);Ochrophyta(100);Diatomea(100);Bacillariophytina(96);	8.67161e-06	1.21403e-05	3.81551e-05	1.90775e-05	3.46865e-05	3.29521e-05	3.81551e-05
Otu00189	121	Eukaryota(100);unclassified(100);unclassified(100);unclassified(100);unclassified(100);unclassified(100);	0	0	1.73432e-06	0	3.46865e-06	1.73432e-05	0.000173432
Otu00190	119	Eukaryota(100);unclassified(100);unclassified(100);unclassified(100);unclassified(100);unclassified(100);	5.8967e-05	6.93729e-06	2.08119e-05	2.77492e-05	2.60148e-05	2.42805e-05	1.38746e-05
Otu00191	118	Eukaryota(100);unclassified(100);unclassified(100);unclassified(100);unclassified(100);unclassified(100);	0	9.88564e-05	5.20297e-06	3.46865e-06	5.20297e-06	6.41699e-05	6.93729e-06
Otu00192	115	Eukaryota(100);Archaeplastida(100);Chloroplastida(100);Chlorophyta(100);Chlorophyceae(100);Scenedesmus(100);	1.21403e-05	9.71221e-05	1.04059e-05	2.25462e-05	2.60148e-05	0	8.67161e-06
Otu00193	113	Eukaryota(100);unclassified(100);unclassified(100);unclassified(100);unclassified(100);unclassified(100);	8.84505e-05	1.73432e-06	1.73432e-06	1.73432e-06	0	2.25462e-05	3.81551e-05
Otu00194	112	Eukaryota(100);unclassified(100);unclassified(100);unclassified(100);unclassified(100);unclassified(100);	0	0.000159558	0	0	0	1.04059e-05	0
Otu00195	111	Eukaryota(100);unclassified(100);unclassified(100);unclassified(100);unclassified(100);unclassified(100);	0	2.42805e-05	3.64208e-05	2.77492e-05	2.60148e-05	0	4.8561e-05
Otu00196	110	Eukaryota(100);unclassified(100);unclassified(100);unclassified(100);unclassified(100);unclassified(100);	3.46865e-06	0.000138746	0	3.46865e-06	3.46865e-06	2.25462e-05	0
Otu00197	110	Eukaryota(100);unclassified(100);unclassified(100);unclassified(100);unclassified(100);unclassified(100);	1.04059e-05	1.90775e-05	3.46865e-05	1.90775e-05	2.42805e-05	4.50924e-05	1.73432e-06
Otu00198	110	Eukaryota(100);unclassified(100);unclassified(100);unclassified(100);unclassified(100);unclassified(100);	7.97788e-05	2.08119e-05	5.20297e-06	2.25462e-05	1.90775e-05	1.56089e-05	6.93729e-06
Otu00199	109	Bacteria(100);Verrucomicrobia(100);Verrucomicrobiae(100);Verrucomicrobiales(100);Verrucomicrobiaceae(100);unclassified(100);	8.84505e-05	1.38746e-05	3.12178e-05	2.60148e-05	3.46865e-06	1.73432e-06	0
Otu00200	109	Eukaryota(100);unclassified(100);unclassified(100);unclassified(100);unclassified(100);unclassified(100);	5.20297e-06	1.90775e-05	6.93729e-06	1.73432e-05	4.16237e-05	1.38746e-05	6.59043e-05
Otu00201	108	Bacteria(100);Proteobacteria(100);unclassified(100);unclassified(100);unclassified(100);unclassified(100);	0	1.73432e-06	1.73432e-06	0	3.46865e-06	1.04059e-05	0.000161292
Otu00202	108	Eukaryota(100);unclassified(100);unclassified(100);unclassified(100);unclassified(100);unclassified(100);	6.93729e-06	0.000124871	0	0	3.46865e-06	2.77492e-05	0
Otu00203	105	Eukaryota(100);unclassified(100);unclassified(100);unclassified(100);unclassified(100);unclassified(100);	0	0.000131809	0	0	0	3.46865e-05	0
Otu00204	105	Bacteria(100);unclassified(100);unclassified(100);unclassified(100);unclassified(100);unclassified(100);	3.46865e-06	1.04059e-05	2.25462e-05	2.94835e-05	1.56089e-05	2.94835e-05	5.72326e-05
Otu00205	103	Eukaryota(100);unclassified(100);unclassified(100);unclassified(100);unclassified(100);unclassified(100);	0	1.73432e-06	5.20297e-06	1.73432e-05	4.16237e-05	4.33581e-05	4.68267e-05
Otu00206	103	Eukaryota(100);unclassified(100);unclassified(100);unclassified(100);unclassified(100);unclassified(100);	0.000126606	0	0	0	0	0	0
Otu00207	101	Eukaryota(100);Archaeplastida(100);Chloroplastida(100);Chlorophyta(100);Chlorophyceae(100);unclassified(100);	8.67161e-06	1.04059e-05	1.90775e-05	3.29521e-05	3.46865e-05	1.90775e-05	2.42805e-05
Otu00208	100	Eukaryota(100);Archaeplastida(100);Chloroplastida(100);Chlorophyta(100);Chlorophyceae(100);Desmodesmus(99);	9.88564e-05	5.20297e-06	2.42805e-05	0	6.93729e-06	1.04059e-05	0
Otu00209	99	Eukaryota(100);unclassified(100);unclassified(100);unclassified(100);unclassified(100);unclassified(100);	1.73432e-06	7.80445e-05	1.38746e-05	6.93729e-06	8.67161e-06	0	3.64208e-05
Otu00210	99	Eukaryota(100);unclassified(100);unclassified(100);unclassified(100);unclassified(100);unclassified(100);	5.20297e-06	1.04059e-05	1.73432e-06	1.56089e-05	5.02954e-05	2.08119e-05	4.16237e-05
Otu00211	99	Eukaryota(100);unclassified(100);unclassified(100);unclassified(100);unclassified(100);unclassified(100);	0	1.73432e-06	0.000126606	1.73432e-06	1.73432e-06	0	0
Otu00212	98	Eukaryota(100);unclassified(100);unclassified(100);unclassified(100);unclassified(100);unclassified(100);	0	1.73432e-06	0	6.93729e-06	1.04059e-05	5.20297e-05	9.01848e-05
Otu00213	98	Eukaryota(100);unclassified(100);unclassified(100);unclassified(100);unclassified(100);unclassified(100);	0	0	5.20297e-06	4.68267e-05	3.81551e-05	4.8561e-05	5.20297e-06
Otu00214	98	Eukaryota(100);Archaeplastida(100);unclassified(100);unclassified(100);unclassified(100);unclassified(100);	5.02954e-05	1.38746e-05	2.77492e-05	3.81551e-05	0	1.21403e-05	0
Otu00215	96	Eukaryota(100);unclassified(100);unclassified(100);unclassified(100);unclassified(100);unclassified(100);	5.20297e-06	0.000121403	0	3.46865e-06	1.73432e-06	1.21403e-05	0
Otu00216	95	Eukaryota(100);unclassified(100);unclassified(100);unclassified(100);unclassified(100);unclassified(100);	2.25462e-05	1.21403e-05	1.04059e-05	4.33581e-05	2.25462e-05	3.12178e-05	5.20297e-06
Otu00217	95	Eukaryota(100);unclassified(100);unclassified(100);unclassified(100);unclassified(100);unclassified(100);	0	1.90775e-05	0.000104059	3.46865e-06	5.20297e-06	0	5.20297e-06
Otu00218	93	unknown(100);unclassified(100);unclassified(100);unclassified(100);unclassified(100);unclassified(100);	4.68267e-05	3.46865e-06	3.46865e-06	5.20297e-06	1.90775e-05	1.38746e-05	5.72326e-05
Otu00219	93	Eukaryota(100);unclassified(100);unclassified(100);unclassified(100);unclassified(100);unclassified(100);	0	0.000114465	0	0	1.73432e-06	3.12178e-05	0
Otu00220	91	Eukaryota(100);unclassified(100);unclassified(100);unclassified(100);unclassified(100);unclassified(100);	6.93729e-06	1.73432e-05	6.93729e-06	1.56089e-05	2.08119e-05	2.77492e-05	4.68267e-05
Otu00221	91	Bacteria(100);Proteobacteria(100);Alphaproteobacteria(100);unclassified(100);unclassified(100);unclassified(100);	4.16237e-05	1.73432e-06	1.73432e-05	2.60148e-05	2.94835e-05	1.73432e-05	1.73432e-06
Otu00222	90	Eukaryota(100);unclassified(100);unclassified(100);unclassified(100);unclassified(100);unclassified(100);	0	5.54983e-05	5.20297e-06	1.73432e-06	5.20297e-06	7.45759e-05	3.46865e-06
Otu00223	88	Eukaryota(100);unclassified(100);unclassified(100);unclassified(100);unclassified(100);unclassified(100);	1.90775e-05	3.29521e-05	0	0	8.67161e-06	7.45759e-05	0
Otu00224	87	Eukaryota(100);unclassified(100);unclassified(100);unclassified(100);unclassified(100);unclassified(100);	0	0	0	0	0	0	0.000147417
Otu00225	85	Eukaryota(100);SAR(100);Alveolata(100);unclassified(100);unclassified(100);unclassified(100);	0.000123137	1.73432e-06	0	0	0	0	0
Otu00226	85	Eukaryota(100);SAR(100);Stramenopiles(100);unclassified(100);unclassified(100);unclassified(100);	0	8.67161e-06	0.000117934	1.73432e-06	1.73432e-06	0	0
Otu00227	84	Bacteria(100);Proteobacteria(100);Alphaproteobacteria(100);Rhizobiales(100);Xanthobacteraceae(81);unclassified(81);	8.67161e-05	3.46865e-06	0	1.21403e-05	5.20297e-06	5.20297e-06	0
Otu00228	83	Eukaryota(100);unclassified(100);unclassified(100);unclassified(100);unclassified(100);unclassified(100);	0	0	3.46865e-06	3.12178e-05	3.12178e-05	3.46865e-05	2.94835e-05
Otu00229	83	Eukaryota(100);unclassified(100);unclassified(100);unclassified(100);unclassified(100);unclassified(100);	0	7.63102e-05	1.73432e-06	1.73432e-06	3.46865e-06	4.50924e-05	3.46865e-06
Otu00230	82	Eukaryota(100);unclassified(100);unclassified(100);unclassified(100);unclassified(100);unclassified(100);	6.93729e-06	7.97788e-05	0	6.93729e-06	2.60148e-05	0	0
Otu00231	82	unknown(100);unclassified(100);unclassified(100);unclassified(100);unclassified(100);unclassified(100);	4.16237e-05	6.93729e-06	5.20297e-06	8.67161e-06	1.90775e-05	1.56089e-05	3.81551e-05
Otu00232	82	Eukaryota(100);unclassified(100);unclassified(100);unclassified(100);unclassified(100);unclassified(100);	0	2.77492e-05	3.29521e-05	1.56089e-05	3.12178e-05	3.46865e-06	1.21403e-05
Otu00233	82	Eukaryota(100);unclassified(100);unclassified(100);unclassified(100);unclassified(100);unclassified(100);	1.90775e-05	3.46865e-06	1.90775e-05	3.64208e-05	1.90775e-05	2.77492e-05	0
Otu00234	80	Eukaryota(100);unclassified(100);unclassified(100);unclassified(100);unclassified(100);unclassified(100);	1.56089e-05	1.56089e-05	2.08119e-05	2.08119e-05	8.67161e-06	4.33581e-05	0
Otu00235	80	Eukaryota(100);unclassified(100);unclassified(100);unclassified(100);unclassified(100);unclassified(100);	0	6.24356e-05	6.93729e-06	0	0	5.72326e-05	0
Otu00236	80	Eukaryota(100);unclassified(100);unclassified(100);unclassified(100);unclassified(100);unclassified(100);	0	0	0	1.73432e-06	1.04059e-05	3.98894e-05	7.97788e-05
Otu00237	80	Eukaryota(100);unclassified(100);unclassified(100);unclassified(100);unclassified(100);unclassified(100);	1.73432e-06	0.000126606	0	0	0	0	0
Otu00238	77	Eukaryota(100);unclassified(100);unclassified(100);unclassified(100);unclassified(100);unclassified(100);	0	0.000119668	0	0	0	0	0
Otu00239	76	Eukaryota(100);unclassified(100);unclassified(100);unclassified(100);unclassified(100);unclassified(100);	0	0	0	5.20297e-06	8.67161e-06	4.50924e-05	6.41699e-05
Otu00240	76	Eukaryota(100);unclassified(100);unclassified(100);unclassified(100);unclassified(100);unclassified(100);	5.20297e-06	7.11072e-05	0	3.46865e-06	2.94835e-05	0	3.46865e-06
Otu00241	76	Eukaryota(100);unclassified(100);unclassified(100);unclassified(100);unclassified(100);unclassified(100);	1.73432e-06	0	5.20297e-06	1.04059e-05	2.94835e-05	3.29521e-05	3.64208e-05
Otu00242	75	Eukaryota(100);unclassified(100);unclassified(100);unclassified(100);unclassified(100);unclassified(100);	0	0	0	5.20297e-06	1.21403e-05	3.12178e-05	6.93729e-05
Otu00243	73	Eukaryota(100);unclassified(100);unclassified(100);unclassified(100);unclassified(100);unclassified(100);	0	8.67161e-06	2.77492e-05	2.42805e-05	2.77492e-05	1.73432e-05	1.73432e-06
Otu00244	72	Eukaryota(100);unclassified(100);unclassified(100);unclassified(100);unclassified(100);unclassified(100);	1.38746e-05	2.08119e-05	1.90775e-05	1.73432e-06	0	5.72326e-05	0
Otu00245	72	Eukaryota(100);unclassified(100);unclassified(100);unclassified(100);unclassified(100);unclassified(100);	0	1.04059e-05	3.46865e-06	1.21403e-05	2.60148e-05	1.56089e-05	4.8561e-05
Otu00246	72	Eukaryota(100);unclassified(100);unclassified(100);unclassified(100);unclassified(100);unclassified(100);	0	6.93729e-06	6.93729e-06	2.77492e-05	8.67161e-06	1.73432e-05	4.50924e-05
Otu00247	71	Eukaryota(100);unclassified(100);unclassified(100);unclassified(100);unclassified(100);unclassified(100);	1.73432e-06	0.000102325	0	0	0	6.93729e-06	0
Otu00248	71	Eukaryota(100);unclassified(100);unclassified(100);unclassified(100);unclassified(100);unclassified(100);	0	6.93729e-06	3.46865e-05	2.42805e-05	2.77492e-05	1.21403e-05	0
Otu00249	71	Eukaryota(100);unclassified(100);unclassified(100);unclassified(100);unclassified(100);unclassified(100);	3.46865e-06	0.000100591	1.73432e-06	0	1.73432e-06	1.04059e-05	0
Otu00250	70	unknown(100);unclassified(100);unclassified(100);unclassified(100);unclassified(100);unclassified(100);	1.73432e-05	1.04059e-05	1.73432e-06	1.38746e-05	1.38746e-05	2.08119e-05	3.29521e-05
Otu00251	70	unknown(100);unclassified(100);unclassified(100);unclassified(100);unclassified(100);unclassified(100);	3.64208e-05	6.93729e-06	8.67161e-06	1.56089e-05	1.04059e-05	1.04059e-05	2.42805e-05
Otu00252	70	unknown(100);unclassified(100);unclassified(100);unclassified(100);unclassified(100);unclassified(100);	2.77492e-05	6.93729e-06	1.21403e-05	1.56089e-05	1.04059e-05	8.67161e-06	2.42805e-05
Otu00253	70	Eukaryota(100);unclassified(100);unclassified(100);unclassified(100);unclassified(100);unclassified(100);	0	0	0	1.73432e-06	1.73432e-06	3.12178e-05	8.32475e-05
Otu00254	70	Eukaryota(100);unclassified(100);unclassified(100);unclassified(100);unclassified(100);unclassified(100);	5.72326e-05	2.60148e-05	6.93729e-06	3.46865e-06	3.46865e-06	1.21403e-05	0
Otu00255	70	Eukaryota(100);Excavata(100);Discoba(100);Discicristata(100);Euglenozoa(100);Kinetoplastea(100);	1.73432e-06	9.71221e-05	5.20297e-06	1.73432e-06	0	0	0
Otu00256	70	Eukaryota(100);unclassified(100);unclassified(100);unclassified(100);unclassified(100);unclassified(100);	5.20297e-06	1.04059e-05	1.56089e-05	6.93729e-06	1.38746e-05	1.56089e-05	3.64208e-05
Otu00257	70	Eukaryota(100);unclassified(100);unclassified(100);unclassified(100);unclassified(100);unclassified(100);	1.73432e-06	8.49818e-05	1.73432e-06	0	0	1.38746e-05	0
Otu00258	69	unknown(100);unclassified(100);unclassified(100);unclassified(100);unclassified(100);unclassified(100);	3.46865e-06	0	0	3.46865e-06	0	8.67161e-06	0.000102325
Otu00259	69	Eukaryota(100);unclassified(100);unclassified(100);unclassified(100);unclassified(100);unclassified(100);	0	0	6.93729e-06	1.04059e-05	3.98894e-05	2.08119e-05	2.42805e-05
Otu00260	68	Bacteria(100);Proteobacteria(100);Alphaproteobacteria(100);unclassified(100);unclassified(100);unclassified(100);	2.94835e-05	5.20297e-06	1.04059e-05	1.38746e-05	5.20297e-06	1.04059e-05	2.77492e-05
Otu00261	68	Eukaryota(100);unclassified(100);unclassified(100);unclassified(100);unclassified(100);unclassified(100);	2.25462e-05	8.67161e-06	6.93729e-06	1.90775e-05	1.73432e-05	6.93729e-06	1.73432e-05
Otu00262	68	Eukaryota(100);unclassified(100);unclassified(100);unclassified(100);unclassified(100);unclassified(100);	9.36534e-05	3.46865e-06	0	1.73432e-06	0	0	0
Otu00263	68	Eukaryota(100);unclassified(100);unclassified(100);unclassified(100);unclassified(100);unclassified(100);	0	5.02954e-05	1.73432e-06	0	1.73432e-06	4.8561e-05	3.46865e-06
Otu00264	67	Eukaryota(100);unclassified(100);unclassified(100);unclassified(100);unclassified(100);unclassified(100);	2.25462e-05	0	8.67161e-06	3.12178e-05	8.67161e-06	2.94835e-05	0
Otu00265	67	Bacteria(100);Proteobacteria(100);Deltaproteobacteria(100);Myxococcales(100);mle1-27(100);unclassified(100);	0	0	0	6.93729e-06	3.29521e-05	2.77492e-05	3.64208e-05
Otu00266	66	Bacteria(100);Proteobacteria(100);Gammaproteobacteria(100);Enterobacteriales(100);Enterobacteriaceae(100);Dickeya(97);	8.67161e-05	5.20297e-06	0	0	0	1.73432e-06	0
Otu00267	65	Eukaryota(100);unclassified(100);unclassified(100);unclassified(100);unclassified(100);unclassified(100);	5.02954e-05	2.25462e-05	3.46865e-06	0	0	0	8.67161e-06
Otu00268	64	Eukaryota(100);unclassified(100);unclassified(100);unclassified(100);unclassified(100);unclassified(100);	0	0	0	3.46865e-06	1.73432e-06	3.64208e-05	6.07013e-05
Otu00269	64	Eukaryota(100);unclassified(100);unclassified(100);unclassified(100);unclassified(100);unclassified(100);	5.20297e-06	9.53877e-05	0	0	0	0	0
Otu00270	62	Eukaryota(100);unclassified(100);unclassified(100);unclassified(100);unclassified(100);unclassified(100);	5.02954e-05	3.46865e-05	3.46865e-06	0	0	0	3.46865e-06
Otu00271	62	Bacteria(100);Planctomycetes(100);OM190(100);unclassified(100);unclassified(100);unclassified(100);	6.93729e-06	3.46865e-06	1.38746e-05	1.73432e-05	6.93729e-06	1.04059e-05	4.33581e-05
Otu00272	62	Eukaryota(100);unclassified(100);unclassified(100);unclassified(100);unclassified(100);unclassified(100);	0	0	0	1.73432e-06	8.67161e-06	3.64208e-05	5.3764e-05
Otu00273	62	Eukaryota(100);unclassified(100);unclassified(100);unclassified(100);unclassified(100);unclassified(100);	2.77492e-05	3.46865e-06	6.93729e-06	2.77492e-05	8.67161e-06	1.73432e-05	1.73432e-06
Otu00274	62	Eukaryota(100);unclassified(100);unclassified(100);unclassified(100);unclassified(100);unclassified(100);	0	5.72326e-05	0	3.46865e-06	0	3.81551e-05	0
Otu00275	61	unknown(100);unclassified(100);unclassified(100);unclassified(100);unclassified(100);unclassified(100);	5.20297e-06	6.93729e-06	5.20297e-06	1.04059e-05	2.25462e-05	1.56089e-05	3.12178e-05
Otu00276	61	Eukaryota(100);unclassified(100);unclassified(100);unclassified(100);unclassified(100);unclassified(100);	8.67161e-06	5.20297e-06	2.42805e-05	1.04059e-05	1.56089e-05	2.42805e-05	5.20297e-06
Otu00277	61	Eukaryota(100);unclassified(100);unclassified(100);unclassified(100);unclassified(100);unclassified(100);	3.46865e-06	1.04059e-05	3.46865e-06	1.38746e-05	1.04059e-05	6.93729e-06	4.50924e-05
Otu00278	61	Bacteria(100);Verrucomicrobia(100);Opitutae(100);Opitutales(100);Opitutaceae(100);Opitutus(100);	1.21403e-05	8.67161e-06	5.20297e-06	1.04059e-05	2.08119e-05	1.38746e-05	1.90775e-05
Otu00279	61	Eukaryota(100);unclassified(100);unclassified(100);unclassified(100);unclassified(100);unclassified(100);	8.67161e-06	1.04059e-05	2.94835e-05	1.90775e-05	8.67161e-06	1.38746e-05	3.46865e-06
Otu00280	60	Eukaryota(100);unclassified(100);unclassified(100);unclassified(100);unclassified(100);unclassified(100);	0	3.98894e-05	0	1.73432e-06	3.46865e-06	4.68267e-05	1.73432e-06
Otu00281	60	unknown(100);unclassified(100);unclassified(100);unclassified(100);unclassified(100);unclassified(100);	3.46865e-06	0	5.20297e-06	1.21403e-05	1.38746e-05	1.21403e-05	5.72326e-05
Otu00282	59	Eukaryota(100);unclassified(100);unclassified(100);unclassified(100);unclassified(100);unclassified(100);	1.21403e-05	1.90775e-05	8.67161e-06	5.20297e-06	0	4.50924e-05	0
Otu00283	59	Eukaryota(100);unclassified(100);unclassified(100);unclassified(100);unclassified(100);unclassified(100);	0	1.90775e-05	2.42805e-05	1.38746e-05	2.08119e-05	0	1.21403e-05
Otu00284	59	Eukaryota(100);Archaeplastida(100);Chloroplastida(100);Chlorophyta(100);Trebouxiophyceae(100);Parachlorella(100);	0	2.60148e-05	1.73432e-06	1.73432e-05	1.21403e-05	2.60148e-05	8.67161e-06
Otu00285	58	Eukaryota(100);unclassified(100);unclassified(100);unclassified(100);unclassified(100);unclassified(100);	1.73432e-05	3.46865e-06	8.67161e-06	2.77492e-05	8.67161e-06	2.42805e-05	0
Otu00286	58	Bacteria(100);Nitrospirae(100);Nitrospira(100);Nitrospirales(100);unclassified(100);unclassified(100);	6.76386e-05	1.21403e-05	0	6.93729e-06	3.46865e-06	0	0
Otu00287	58	Eukaryota(100);Archaeplastida(100);Chloroplastida(100);Chlorophyta(100);Trebouxiophyceae(100);unclassified(64);	0	3.46865e-06	3.46865e-06	3.12178e-05	5.20297e-06	2.25462e-05	3.12178e-05
Otu00288	58	Eukaryota(100);unclassified(100);unclassified(100);unclassified(100);unclassified(100);unclassified(100);	5.20297e-06	1.73432e-06	3.64208e-05	0	5.20297e-06	2.94835e-05	0
Otu00289	56	unknown(100);unclassified(100);unclassified(100);unclassified(100);unclassified(100);unclassified(100);	1.73432e-06	9.01848e-05	0	0	0	0	0
Otu00290	56	Eukaryota(100);unclassified(100);unclassified(100);unclassified(100);unclassified(100);unclassified(100);	0	1.56089e-05	1.73432e-06	2.60148e-05	2.42805e-05	1.90775e-05	0
Otu00291	55	Eukaryota(100);Opisthokonta(100);Holozoa(100);unclassified(100);unclassified(100);unclassified(100);	0	3.46865e-06	2.25462e-05	2.25462e-05	3.29521e-05	5.20297e-06	0
Otu00292	55	Eukaryota(100);unclassified(100);unclassified(100);unclassified(100);unclassified(100);unclassified(100);	0	1.73432e-06	2.60148e-05	1.90775e-05	1.38746e-05	1.56089e-05	0
Otu00293	55	Eukaryota(100);unclassified(100);unclassified(100);unclassified(100);unclassified(100);unclassified(100);	0	4.33581e-05	1.73432e-06	1.73432e-06	1.73432e-06	2.77492e-05	8.67161e-06
Otu00294	55	Eukaryota(100);unclassified(100);unclassified(100);unclassified(100);unclassified(100);unclassified(100);	0	1.04059e-05	1.73432e-06	1.21403e-05	1.56089e-05	1.21403e-05	2.77492e-05
Otu00295	55	unknown(100);unclassified(100);unclassified(100);unclassified(100);unclassified(100);unclassified(100);	1.38746e-05	8.67161e-06	6.93729e-06	6.93729e-06	1.38746e-05	1.21403e-05	1.73432e-05
Otu00296	54	unknown(100);unclassified(100);unclassified(100);unclassified(100);unclassified(100);unclassified(100);	2.60148e-05	5.20297e-06	1.38746e-05	1.73432e-05	6.93729e-06	6.93729e-06	1.38746e-05
Otu00297	54	Eukaryota(100);unclassified(100);unclassified(100);unclassified(100);unclassified(100);unclassified(100);	0	1.04059e-05	8.67161e-06	4.50924e-05	1.21403e-05	3.46865e-06	0
Otu00298	53	Eukaryota(100);unclassified(100);unclassified(100);unclassified(100);unclassified(100);unclassified(100);	0	1.90775e-05	6.93729e-06	1.04059e-05	2.42805e-05	0	1.38746e-05
Otu00299	53	Eukaryota(100);Opisthokonta(100);Holozoa(100);Metazoa(100);Animalia(100);Craniata(100);	1.73432e-05	1.38746e-05	3.46865e-06	3.46865e-06	6.93729e-06	1.56089e-05	2.60148e-05
Otu00300	53	Eukaryota(100);unclassified(100);unclassified(100);unclassified(100);unclassified(100);unclassified(100);	0	0	0	1.73432e-06	3.46865e-06	4.33581e-05	3.81551e-05
[truncated: 4,560 more rows]

## Sheet: 16S_top20
OTU	Size	Taxonomy	S1	S2	S3	S4	S5	S6	S7
[truncated: 20 more rows]

[truncated: 2 more sheets: 18S_top20, Sheet1]
